# Supplementary material
Source: PubMed Central journal article supplement (PMC5985524)

## **Supporting Information**

### **Radical Cation Cyclopropanations via Chromium Photooxidative Catalysis**

Francisco J. Sarabia and Eric M. Ferreira\*

*Department of Chemistry, University of Georgia, Athens, Georgia 30602, United States*

[emferr@uga.edu](mailto:emferr@uga.edu)

**Table of Contents**

|                                          |     |
|------------------------------------------|-----|
| Materials and Methods .....              | S3  |
| Safety/Hazards .....                     | S3  |
| Cyclopropanations - Reaction Scope ..... | S4  |
| Alkene Scope .....                       | S4  |
| Diazo Scope .....                        | S15 |
| Diastereomer Assignments .....           | S21 |
| Optimization Studies .....               | S22 |
| Chemoselectivity Experiments .....       | S23 |
| Nucleophile Competition Experiment ..... | S25 |
| Oxygen-Free Experiments .....            | S26 |
| Substrate Synthesis .....                | S27 |
| Alkene Substrates .....                  | S27 |
| Diazo Substrates .....                   | S32 |
| References .....                         | S35 |
| Spectra Compilation .....                | S36 |

## Materials and Methods

Cr(III) catalysts were synthesized as described by Shores and Damrauer.<sup>1</sup> Ru(bpz)<sub>3</sub>(PF<sub>6</sub>)<sub>2</sub> and Ru(bpy)<sub>3</sub>Cl<sub>2</sub> were purchased from Sigma-Aldrich. Ru(bpy)<sub>3</sub>(PF<sub>6</sub>)<sub>2</sub> and methyl viologen bis(hexafluorophosphate) were prepared according to the procedures by Yoon and coworkers.<sup>2</sup> All solvents, excluding nitromethane and 1,2-dichloroethane, were purified by passing through activated alumina columns. All reagents were used as received unless otherwise noted. Commercially available chemicals were purchased from Alfa Aesar (Ward Hill, MA), Sigma-Aldrich (St. Louis, MO), Oakwood Products (West Columbia, SC), Strem (Newburyport, MA), and TCI America (Portland, OR). Qualitative TLC analysis was performed on 250 mm thick, 60 Å, glass backed, F254 silica (Silicycle, Quebec City, Canada). Visualization was accomplished with UV light and exposure to *p*-anisaldehyde or KMnO<sub>4</sub> stain solutions followed by heating. Flash chromatography was performed using Silicycle silica gel (230-400 mesh). Reactions under near-UV irradiation (NUV) were performed in a Luzchem photoreactor (LZC-ORG) equipped with 10 lamps of wavelengths 419, 350, and 300 nm. Irradiation with visible light was performed in a closed box using a 23 W compact fluorescent light bulb (EcoSmart 23 W bright white CFL spiral light bulb, 1600 lumens). The temperature of this closed box when operating was measured at approximately 35-40 °C. Cycloadditions using all modes of irradiation were performed using borosilicate vials. <sup>1</sup>H NMR spectra were acquired on a Varian Mercury Plus 400 MHz NMR and are reported relative to SiMe<sub>4</sub> (δ 0.00). <sup>13</sup>C NMR spectra were acquired on a Varian Mercury Plus NMR (at 100 MHz) or a Varian Unity Inova NMR (at 125 MHz) and are reported relative to SiMe<sub>4</sub> (δ 0.0). IR spectra were obtained on a Nicolet 380 FT-IR. High-resolution mass spectrometry data was acquired by the University of Georgia Proteomics and Mass Spectrometry Core Facility on a Bruker Esquire 3000 Plus Ion Trap Spectrophotometer.

## Safety/Hazards

Diazo compounds are generally toxic, irritants, and are documented to have numerous physical and health hazards. Care should be taken when handling and synthesizing diazo compounds, and the proper personal protective equipment should be utilized.

## Cyclopropanations - Reaction Scope

**General Procedure for the photocatalyzed cyclopropanation:** A solution of (*E*)-alkene (1 equiv), diazo species (1.1-2.2 equiv), and  $[\text{Cr}(\text{Ph}_2\text{phen})_3](\text{BF}_4)_3$  (1-2 mol %) in DCE (0.10 M) was prepared in a flame-dried borosilicate vial open to air. The vial was then capped and placed on a stir plate in a closed box lined with aluminum foil and equipped with a 23 W compact fluorescent light bulb. The reaction mixture was irradiated with stirring until consumption of the alkene was complete, as determined by TLC. Once finished, the reaction mixture was concentrated via rotary evaporation and purified by flash column chromatography to afford the desired product.

### Alkene Scope

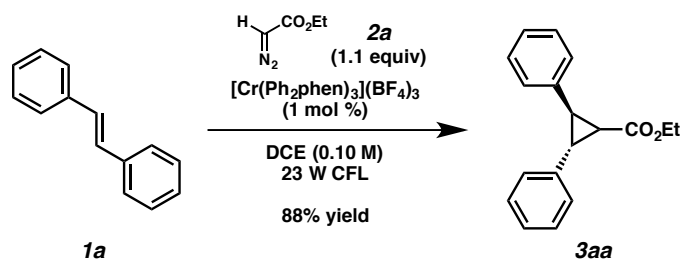

**Cyclopropane 3aa.** Prepared according to the *General Procedure* using 18.0 mg *trans*-stilbene (0.0999 mmol), 14.7 mg ethyl diazoacetate (85% wt. solution in  $\text{CH}_2\text{Cl}_2$ , 0.110 mmol), 1.3 mg  $[\text{Cr}(\text{Ph}_2\text{phen})_3](\text{BF}_4)_3$  (0.999  $\mu\text{mol}$ ), and 1.0 mL DCE. The reaction mixture was irradiated for 14 h. The crude product was purified by flash chromatography (100% hexanes  $\rightarrow$  19:1 hexanes/acetone eluent) to afford cyclopropane **3aa**<sup>3</sup> (23.5 mg, 88% yield) as a colorless oil.

**TLC:**  $R_f$  = 0.32 in 19:1 hexanes/acetone, visualized by UV.

**$^1\text{H}$  NMR** (400 MHz;  $\text{CDCl}_3$ ):  $\delta$  7.36-7.21 (comp. m, 10H), 3.95 (dq,  $J$  = 7.2, 1.8 Hz, 2H), 3.22 (dd,  $J$  = 7.0, 5.2 Hz, 1H), 2.94 (dd,  $J$  = 9.4, 7.0 Hz, 1H), 2.42 (dd,  $J$  = 9.4, 5.2 Hz, 1H), 1.04 (t,  $J$  = 7.2 Hz, 3H).

**$^{13}\text{C}$  NMR** (100 MHz;  $\text{CDCl}_3$ ):  $\delta$  170.1, 139.8, 136.3, 129.3, 128.8, 128.2, 127.1, 126.8, 60.6, 34.6, 31.4, 29.4, 14.2.

**IR** (ATR, neat): 3050, 3997, 1729, 1948, 1177, 752, 696  $\text{cm}^{-1}$ .

**HRMS** (ESI+):  $m/z$  calc'd for  $(\text{M}+\text{H})^+ [\text{C}_{18}\text{H}_{18}\text{O}_2 + \text{H}]^+$ : 267.1380 found 267.1381.

### (Gram Scale Experiment)

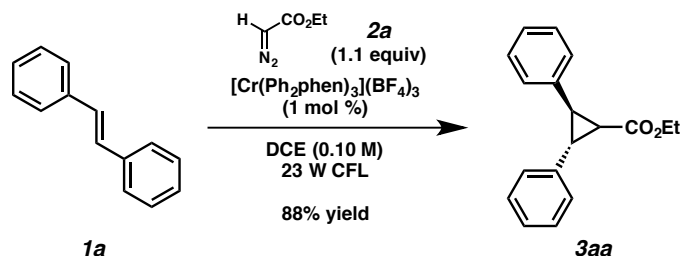

Inside a flame-dried round bottom flask open to air, a solution containing 1.00 g *trans*-stilbene (5.55 mmol), 820 mg ethyl diazoacetate (85% solution in  $\text{CH}_2\text{Cl}_2$ , 6.11 mmol), and 72.7 mg  $[\text{Cr}(\text{Ph}_2\text{phen})_3](\text{BF}_4)_3$  (0.0555 mmol) in 56 mL DCE was prepared. The flask was then fitted with a rubber septa and needle outlet open to air and placed in a closed box, lined with aluminum foil, and equipped with a 23 W compact fluorescent light bulb. The reaction mixture was irradiated with stirring until consumption of the alkene was complete (43 h), as determined by TLC. The reaction was concentrated via rotary evaporation, and the crude product was purified by flash chromatography (100% hexanes  $\rightarrow$  19:1 hexanes/acetone eluent) to afford *trans*-cyclopropane **3aa** (1.30 g, 88% yield) as a colorless oil.



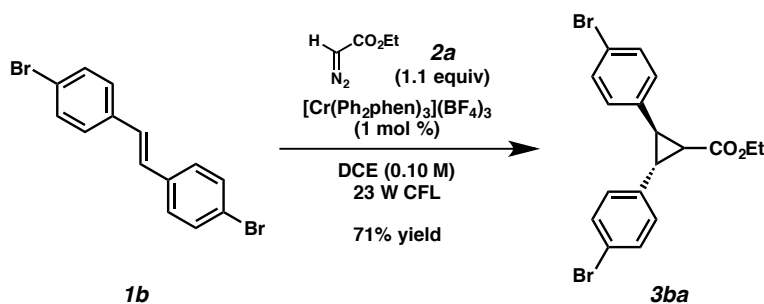

**Cyclopropane 3ba.** Prepared according to the *General Procedure* using 34.0 mg *trans*-4,4'-dibromostilbene (0.101 mmol), 15.0 mg ethyl diazoacetate (85% wt. solution in  $\text{CH}_2\text{Cl}_2$ , 0.111 mmol), 1.3 mg  $[\text{Cr}(\text{Ph}_2\text{phen})_3](\text{BF}_4)_3$  (1.01  $\mu\text{mol}$ ), and 1.0 mL DCE. The reaction mixture was irradiated for 14 h. The crude product was purified by flash chromatography (100% hexanes  $\rightarrow$  9:1 hexanes/ $\text{Et}_2\text{O}$  eluent) to afford cyclopropane **3ba** (30.3 mg, 71% yield) as a white solid.

**TLC:**  $R_f = 0.34$  in 9:1 hexanes/ $\text{Et}_2\text{O}$ , visualized by UV.

**$^1\text{H NMR}$**  (400 MHz;  $\text{CDCl}_3$ ):  $\delta$  7.45 (d,  $J = 8.4$  Hz, 2H), 7.43 (d,  $J = 8.4$  Hz, 2H), 7.20 (d,  $J = 8.4$  Hz, 2H), 7.10 (d,  $J = 8.4$  Hz, 2H), 3.98 (dq,  $J = 7.2, 2.4$  Hz, 2H), 3.12 (dd,  $J = 7.0, 5.2$  Hz, 1H), 2.81 (dd,  $J = 9.6, 7.0$  Hz, 1H), 2.38 (dd,  $J = 9.6, 5.2$  Hz, 1H), 1.09 (t,  $J = 7.2$  Hz, 3H).

**$^{13}\text{C NMR}$**  (100 MHz;  $\text{CDCl}_3$ ):  $\delta$  169.6, 138.3, 134.9, 131.9, 131.4, 130.9, 128.5, 121.1, 120.7, 60.9, 33.8, 31.3, 28.9, 14.3.

**IR** (ATR, neat): 1724, 1490, 1178, 1073, 1010, 817  $\text{cm}^{-1}$ .

**HRMS** (ESI+):  $m/z$  calc'd for  $(\text{M}+\text{H})^+ [\text{C}_{18}\text{H}_{16}\text{Br}_2\text{O}_2 + \text{H}]^+$ : 424.9569, found 424.9572.

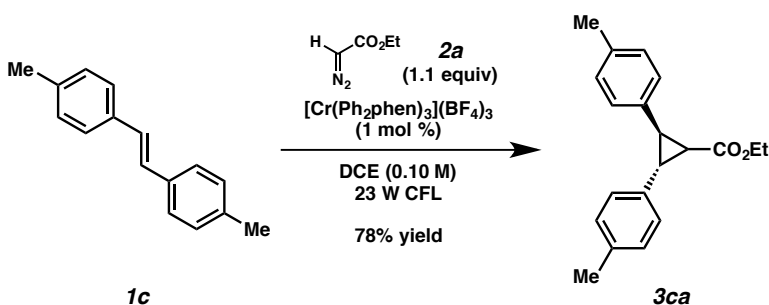

**Cyclopropane 3ca.** Prepared according to the *General Procedure* using 21.1 mg 4,4'-dimethyl-*trans*-stilbene (0.101 mmol), 15.0 mg ethyl diazoacetate (85% wt. solution in  $\text{CH}_2\text{Cl}_2$ , 0.111 mmol), 1.3 mg  $[\text{Cr}(\text{Ph}_2\text{phen})_3](\text{BF}_4)_3$  (1.01  $\mu\text{mol}$ ), and 1.0 mL DCE. The reaction mixture was irradiated for 24 h. The crude product was purified by flash chromatography (100% hexanes  $\rightarrow$  9:1 hexanes/ $\text{Et}_2\text{O}$  eluent) to afford cyclopropane **3ca** (23.3 mg, 78% yield) as a colorless oil.

**TLC:**  $R_f = 0.37$  in 9:1 hexanes/ $\text{Et}_2\text{O}$ , visualized by UV.

Spectroscopic data were in accordance with the published values.<sup>3</sup>

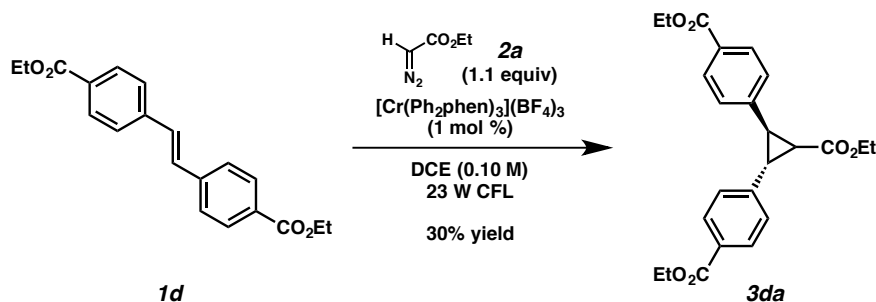

**Cyclopropane 3da.** Prepared according to the *General Procedure* using 32.0 mg *E*-alkene **1d** (0.0986 mmol), 14.6 mg ethyl diazoacetate (85% wt. solution in  $\text{CH}_2\text{Cl}_2$ , 0.109 mmol), 1.3 mg  $[\text{Cr}(\text{Ph}_2\text{phen})_3](\text{BF}_4)_3$  (0.986  $\mu\text{mol}$ ), and 1.0 mL DCE. The

reaction mixture was irradiated for 72 h. The crude product was purified by flash chromatography (3:2 hexanes/Et<sub>2</sub>O as eluent) to afford cyclopropane **3da** (12.0 mg, 30% yield) as a colorless oil.

TLC:  $R_f$  = 0.33 in 3:2 hexanes/Et<sub>2</sub>O, visualized by UV.

<sup>1</sup>H NMR (400 MHz; CDCl<sub>3</sub>): δ 8.01 (d,  $J$  = 8.4 Hz, 2H), 7.99 (d,  $J$  = 8.4 Hz, 2H), 7.41 (d,  $J$  = 8.0 Hz, 2H), 7.30 (d,  $J$  = 8.0 Hz, 2H), 4.40-4.34 (comp. m, 4H), 3.96 (q,  $J$  = 7.0 Hz, 1H), 3.28 (dd,  $J$  = 7.0, 5.2 Hz, 1H), 2.98 (dd,  $J$  = 9.8, 7.0 Hz, 1H), 2.52 (dd,  $J$  = 9.8, 5.2 Hz, 1H), 1.40 (t,  $J$  = 7.2 Hz, 3H), 1.39 (t,  $J$  = 7.2 Hz, 3H), 1.06 (t,  $J$  = 7.0 Hz, 3H).

<sup>13</sup>C NMR (100 MHz; CDCl<sub>3</sub>): δ 169.4, 166.5, 166.4, 144.5, 141.0, 130.1, 129.6, 129.4, 129.3, 129.2, 126.6, 61.13, 61.06, 61.0, 34.7, 32.0, 29.5, 14.5, 14.3.

IR (ATR, neat): 2984, 1717, 1275, 1180, 1104, 1020 cm<sup>-1</sup>.

HRMS (ESI+):  $m/z$  calc'd for (M+H)<sup>+</sup> [C<sub>24</sub>H<sub>26</sub>O<sub>6</sub> + H]<sup>+</sup>: 411.1802, found 411.1804.

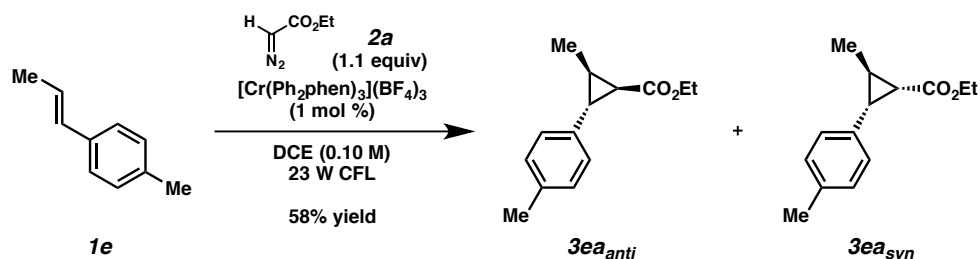

**Cyclopropane 3ea.** Prepared according to the *General Procedure* using 13.5 mg *E*-alkene **1e** (0.102 mmol), 15.1 mg ethyl diazoacetate (85% wt. solution in CH<sub>2</sub>Cl<sub>2</sub>, 0.112 mmol), 1.3 mg [Cr(Ph<sub>2</sub>phen)<sub>3</sub>](BF<sub>4</sub>)<sub>3</sub> (1.02 μmol), and 1.0 mL DCE. The reaction mixture was irradiated for 24 h. Diastereomeric ratio (1:1.1 *anti*/*syn*) was determined by <sup>1</sup>H NMR analysis of the crude mixture. The crude product was purified by flash chromatography (100% hexanes → 19:1 hexanes/EtOAc eluent) to afford *trans*-cyclopropane **3ea** (13.0 mg, 58% yield) as a colorless oil.

TLC:  $R_f$  = 0.36 in 9:1 hexanes/Et<sub>2</sub>O, visualized by UV. Stained purple by *p*-anisaldehyde.

<sup>1</sup>H NMR (400 MHz; CDCl<sub>3</sub>): Major (syn): δ 7.12 (d,  $J$  = 8.2 Hz, 2H), 7.05 (d,  $J$  = 8.2 Hz, 2H), 4.16 (dq,  $J$  = 7.2, 4.4 Hz, 2H), 2.34-2.33 (m, 1H), 2.29 (s, 3H), 2.04 (app. quintet,  $J$  = 6.0 Hz, 1H), 1.78 (dd,  $J$  = 9.2, 5.2 Hz, 1H), 1.26 (d,  $J$  = 6.0 Hz, 3H), 1.02 (t,  $J$  = 7.2 Hz, 3H).

Minor (anti): δ 6.97 (d,  $J$  = 7.8 Hz, 2H), 7.08 (d,  $J$  = 7.8 Hz, 2H), 3.89 (dq,  $J$  = 7.2, 2.8 Hz, 2H), 2.37 (dd,  $J$  = 6.4, 5.2 Hz, 1H), 2.31 (s, 3H), 1.97 (dd,  $J$  = 9.2, 5.2 Hz, 1H), 1.67-1.62 (comp. m, 1H), 1.34 (d,  $J$  = 6.0 Hz, 3H), 1.28 (t,  $J$  = 7.2 Hz, 3H).

<sup>13</sup>C NMR (125 MHz; CDCl<sub>3</sub>): δ 171.9, 171.2, 137.7, 136.1, 133.7, 129.4, 129.2, 129.1, 128.7, 126.1, 60.6, 60.2, 34.1, 32.2, 30.1, 29.4, 25.6, 21.2, 21.1, 19.9, 17.9, 14.5, 14.2, 12.2.

IR (ATR, neat): 2981, 1731, 1439, 1375, 1181, 1163, 1047 cm<sup>-1</sup>.

HRMS (ESI+):  $m/z$  calc'd for (M + Na)<sup>+</sup> [C<sub>14</sub>H<sub>18</sub>O<sub>2</sub> + Na]<sup>+</sup>: 241.1199, found 241.1200.

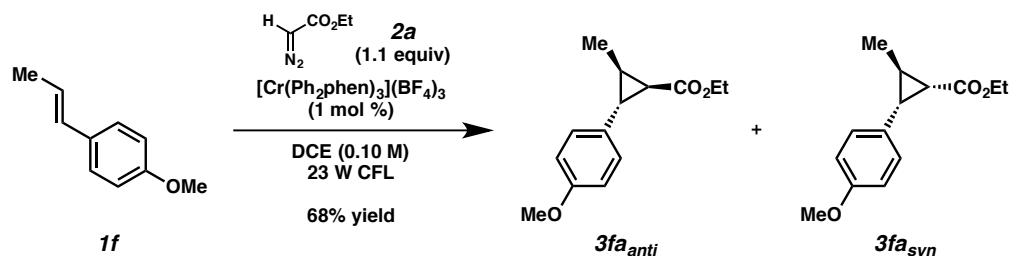

**Cyclopropane 3fa.** Prepared according to the *General Procedure* using 14.7 mg *trans*-anethole (0.0992 mmol), 14.6 mg ethyl diazoacetate (85% wt. solution in CH<sub>2</sub>Cl<sub>2</sub>, 0.109 mmol), 1.3 mg [Cr(Ph<sub>2</sub>phen)<sub>3</sub>](BF<sub>4</sub>)<sub>3</sub> (0.992 μmol), and 1.0 mL DCE. The reaction mixture was irradiated for 25 h. Diastereomeric ratio (1:1:1 *anti*/*syn*) was determined by <sup>1</sup>H NMR analysis of the crude mixture. The crude product was purified by flash chromatography (100% hexanes → 9:1 hexanes/EtOAc eluent) to afford cyclopropane **3fa** (15.8 mg, 68% yield) as a colorless oil.

TLC:  $R_f$  = 0.45 in 9:1 hexanes/EtOAc, visualized by UV.

<sup>1</sup>H NMR (400 MHz; CDCl<sub>3</sub>): Major (anti): δ 7.01 (d,  $J$  = 8.8 Hz, 2H), 6.82 (d,  $J$  = 8.8 Hz, 2H), 4.17 (dq,  $J$  = 7.2, 1.6 Hz, 2H), 3.78 (s, 3H), 2.36 (dd,  $J$  = 6.2, 5.2 Hz, 1H), 1.93 (dd,  $J$  = 9.0, 5.2 Hz, 1H), 1.65-1.59 (comp. m, 1H), 1.34 (d,  $J$  = 6.4 Hz,

3H), 1.28 (t,  $J = 7.2$  Hz, 3H).

**Minor (syn):**  $\delta$  7.16 (d,  $J = 8.8$  Hz, 2H), 6.79 (d,  $J = 8.8$  Hz, 2H), 3.89 (dq,  $J = 7.2, 1.2$  Hz, 2H), 3.77 (s, 3H), 2.29 (dd,  $J = 8.8, 7.2$  Hz, 1H), 2.02 (app. sextet,  $J = 6.0$  Hz, 1H), 1.77 (dd,  $J = 8.8, 5.2$  Hz, 1H), 1.26 (d,  $J = 6.0$  Hz, 3H), 1.03 (t,  $J = 7.2$  Hz, 3H).

**$^{13}\text{C}$  NMR** (100 MHz;  $\text{CDCl}_3$ ):  $\delta$  171.9, 171.1, 158.32, 158.27, 132.7, 130.2, 128.8, 127.3, 114.0, 113.4, 60.5, 60.2, 55.4, 55.3, 33.7, 31.9, 30.1, 29.2, 25.3, 20.0, 17.9, 14.5, 14.3, 12.1.

**IR** (ATR, neat): 2959, 1722, 1518, 1246, 1163, 1035, 829  $\text{cm}^{-1}$ .

**HRMS** (ESI+):  $m/z$  calc'd for  $(\text{M} + \text{Na})^+$  [ $\text{C}_{14}\text{H}_{18}\text{O}_3 + \text{Na}$ ] $^+$ : 257.1154, found 257.1149.

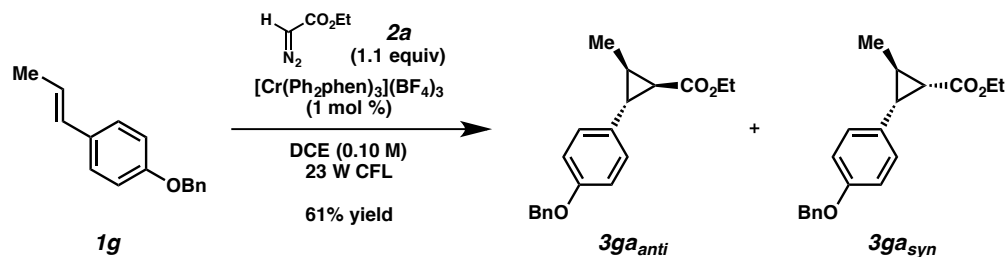

**Cyclopropane 3ga.** Prepared with a slight modification to the *General Procedure* using 22.5 mg *E*-alkene **1g** (0.100 mmol), 14.8 mg ethyl diazoacetate (85% wt. solution in  $\text{CH}_2\text{Cl}_2$ , 0.110 mmol), 1.3 mg  $[\text{Cr}(\text{Ph}_2\text{phen})_3](\text{BF}_4)_3$  (1.00  $\mu\text{mol}$ ), and 1.0 mL DCE. The reaction mixture was irradiated for 42 h *with a needle outlet open to air*. Diastereomeric ratio (~1:1 anti/syn) was determined by  $^1\text{H}$  NMR analysis of the crude mixture. The crude product was purified by flash chromatography (100% hexanes  $\rightarrow$  9:1 hexanes/EtOAc eluent) to afford cyclopropane **3ga** (19.1 mg, 61% yield) as a white solid.

**TLC:**  $R_f = 0.44$  in 9:1 hexanes/EtOAc, visualized by UV.

**$^1\text{H}$  NMR** (400 MHz;  $\text{CDCl}_3$ ): **Anti:**  $\delta$  7.43-7.30 (comp. m, 5H), 7.01 (d,  $J = 8.4$  Hz, 2H), 6.89 (d,  $J = 8.4$  Hz, 2H), 5.04 (s, 2H), 4.17 (qd,  $J = 7.0, 2.0$  Hz, 2H), 2.37 (dd,  $J = 6.4, 5.0$  Hz, 1H), 1.94 (dd,  $J = 9.2, 5.0$  Hz, 1H), 1.65-1.59 (comp. m, 1H), 1.34 (d,  $J = 6.0$  Hz, 3H), 1.29 (t,  $J = 7.0$  Hz, 3H).

**Syn:**  $\delta$  7.43-7.30 (comp. m, 5H), 7.16 (d,  $J = 8.4$  Hz, 2H), 6.87 (d,  $J = 8.4$  Hz, 2H), 5.03 (s, 3H), 3.89 (qd,  $J = 7.2, 1.2$  Hz, 2H), 2.30 (dd,  $J = 9.2, 7.0$  Hz, 1H), 2.03 (app. sextet,  $J = 6.0$  Hz, 1H), 1.78 (dd,  $J = 9.2, 5.2$  Hz, 1H), 1.26 (d,  $J = 6.0$  Hz, 3H), 1.02 (t,  $J = 7.2$  Hz, 3H).

**$^{13}\text{C}$  NMR** (100 MHz;  $\text{CDCl}_3$ ):  $\delta$  171.9, 171.1, 157.6, 157.5, 137.3, 137.2, 133.0, 130.2, 129.2, 128.70, 128.67, 128.1, 128.0, 127.6, 127.5, 127.3, 115.0, 114.4, 70.2, 70.1, 60.5, 60.2, 33.8, 31.9, 30.1, 29.3, 25.3, 20.0, 17.9, 14.5, 14.3, 12.1.

**IR** (ATR, neat): 2980, 1721, 1514, 1454, 1371, 1242, 1175, 1026  $\text{cm}^{-1}$ .

**HRMS** (ESI+):  $m/z$  calc'd for  $(\text{M} + \text{H})^+$  [ $\text{C}_{20}\text{H}_{22}\text{O}_3 + \text{H}$ ] $^+$ : 311.1647, found 311.1643.

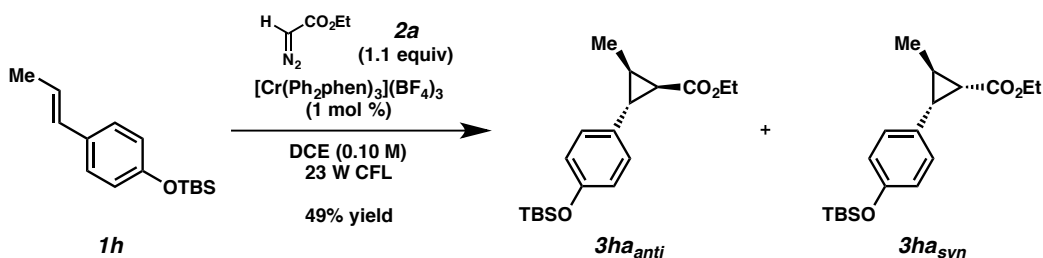

**Cyclopropane 3ha.** Prepared according to the *General Procedure* using 26.4 mg *E*-alkene **1h** (0.106 mmol), 15.7 mg ethyl diazoacetate (85% wt. solution in  $\text{CH}_2\text{Cl}_2$ , 0.117 mmol), 1.4 mg  $[\text{Cr}(\text{Ph}_2\text{phen})_3](\text{BF}_4)_3$  (1.06  $\mu\text{mol}$ ), and 1.1 mL DCE. The reaction mixture was irradiated for 25 h. Diastereomeric ratio (1.2:1 anti/syn) was determined by  $^1\text{H}$  NMR analysis of the crude mixture. The crude product was purified by flash chromatography (100% hexanes  $\rightarrow$  9:1 hexanes/Et<sub>2</sub>O eluent) to afford cyclopropane **3ha** (17.4 mg, 49% yield) as a colorless oil.

**TLC:**  $R_f = 0.40$  in 9:1 hexanes/Et<sub>2</sub>O, visualized by UV.

**$^1\text{H}$  NMR** (400 MHz;  $\text{CDCl}_3$ ): **Major (anti):**  $\delta$  6.93 (d,  $J = 7.8$  Hz, 2H), 6.74 (d,  $J = 7.8$  Hz, 2H), 4.16 (qd,  $J = 7.2, 1.6$  Hz, 2H), 2.34 (dd,  $J = 6.2, 5.1$  Hz, 1H), 1.93 (dd,  $J = 9.2, 5.1$  Hz, 1H), 1.64-1.59 (comp. m, 1H), 1.33 (d,  $J = 6.0$  Hz, 3H), 0.98 (t,  $J = 7.2$  Hz, 3H), 0.98 (s, 9H), 0.17 (s, 6H).

**Minor (syn):**  $\delta$  7.09 (d,  $J$  = 8.4 Hz, 2H), 6.72 (d,  $J$  = 8.4 Hz, 2H), 3.86 (qd,  $J$  = 7.2, 3.0 Hz, 2H), 2.27 (dd,  $J$  = 9.2, 7.0 Hz, 1H), 2.02 (app. sextet,  $J$  = 6.0 Hz, 1H), 1.76 (dd,  $J$  = 9.2, 5.2 Hz, 1H), 1.28 (t,  $J$  = 7.2 Hz, 3H), 1.24 (d,  $J$  = 6.0 Hz, 3H), 0.96 (s, 9H), 0.16 (s, 6H).

**$^{13}\text{C}$  NMR** (100 MHz;  $\text{CDCl}_3$ ):  $\delta$  171.9, 171.0, 154.4, 154.2, 133.3, 130.1, 129.5, 127.1, 120.2, 119.6, 60.5, 60.1, 33.8, 32.0, 30.4, 29.4, 25.8, 25.7, 25.4, 19.7, 18.4, 17.9, 14.5, 14.3, 12.2, -4.3.

**IR** (ATR, neat): 2957, 2856, 1724, 1512, 1254, 1175, 914, 837, 781  $\text{cm}^{-1}$ .

**HRMS** (ESI+):  $m/z$  calc'd for  $(\text{M} + \text{H})^+$  [ $\text{C}_{19}\text{H}_{30}\text{O}_3\text{Si} + \text{H}$ ] $^+$ : 335.2037, found 335.2033.

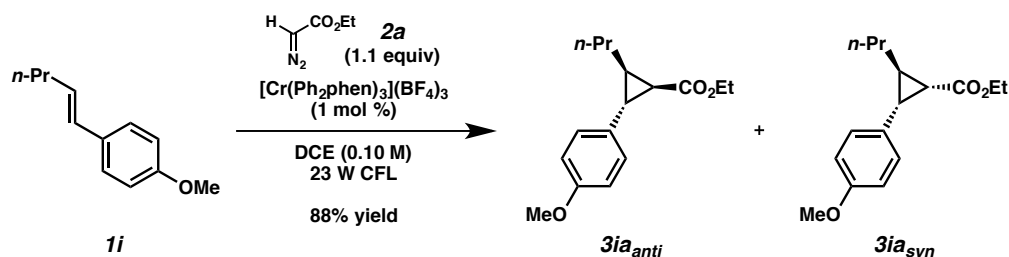

**Cyclopropane 3ia.** Prepared according to the *General Procedure* using 18.4 mg *E*-alkene **1i** (0.104 mmol), 15.4 mg ethyl diazoacetate (85% wt. solution in  $\text{CH}_2\text{Cl}_2$ , 0.115 mmol), 1.4 mg  $[\text{Cr}(\text{Ph}_2\text{phen})_3](\text{BF}_4)_3$  (1.04  $\mu\text{mol}$ ), and 1.0 mL DCE. The reaction mixture was irradiated for 14 h. Diastereomeric ratio (1.2:1 anti/syn) was determined by  $^1\text{H}$  NMR analysis of the crude mixture. The crude product was purified by flash chromatography (100% hexanes  $\rightarrow$  9:1 hexanes/EtOAc eluent) to afford cyclopropane **3ia** (24.0 mg, 88% yield) as a colorless oil.

**TLC:**  $R_f$  = 0.45 in 9:1 hexanes/EtOAc, visualized by UV.

**$^1\text{H}$  NMR** (400 MHz;  $\text{CDCl}_3$ ): **Major (anti):**  $\delta$  7.02 (d,  $J$  = 8.6 Hz, 2H), 6.81 (d,  $J$  = 8.6 Hz, 2H), 4.16 (q,  $J$  = 7.2 Hz, 2H), 3.78 (s, 3H), 2.41 (dd,  $J$  = 6.4, 5.1 Hz, 1H), 1.94 (dd,  $J$  = 9.0, 5.1 Hz, 1H), 1.74-1.34 (comp. m, 5H), 1.28 (t,  $J$  = 7.2 Hz, 3H), 0.93 (t,  $J$  = 7.2 Hz, 3H).

**Minor (syn):**  $\delta$  7.16 (d,  $J$  = 8.2 Hz, 2H), 6.80 (d,  $J$  = 8.2 Hz, 2H), 3.90 (qd,  $J$  = 7.2, 1.2 Hz, 2H), 3.77 (s, 3H), 2.31 (dd,  $J$  = 9.2, 7.0 Hz, 1H), 2.01-1.98 (comp. m, 1H), 1.79 (dd,  $J$  = 9.2, 4.8 Hz, 1H), 1.74-1.34 (comp. m, 4H), 1.03 (t,  $J$  = 7.2 Hz, 3H), 0.98 (t,  $J$  = 7.2 Hz, 3H).

**$^{13}\text{C}$  NMR** (100 MHz;  $\text{CDCl}_3$ ):  $\delta$  172.1, 171.2, 158.34, 158.27, 132.8, 130.3, 129.0, 127.4, 114.0, 113.4, 60.5, 60.2, 55.4, 55.3, 35.1, 32.7, 31.1, 31.0, 29.0, 28.9, 28.6, 25.6, 22.8, 22.3, 14.5, 14.3, 14.03, 13.96.

**IR** (ATR, neat): 2959, 1721, 1516, 1246, 1175, 1036, 843  $\text{cm}^{-1}$ .

**HRMS** (ESI+):  $m/z$  calc'd for  $(\text{M} + \text{H})^+$  [ $\text{C}_{16}\text{H}_{22}\text{O}_3 + \text{H}$ ] $^+$ : 263.1642, found 262.1638.

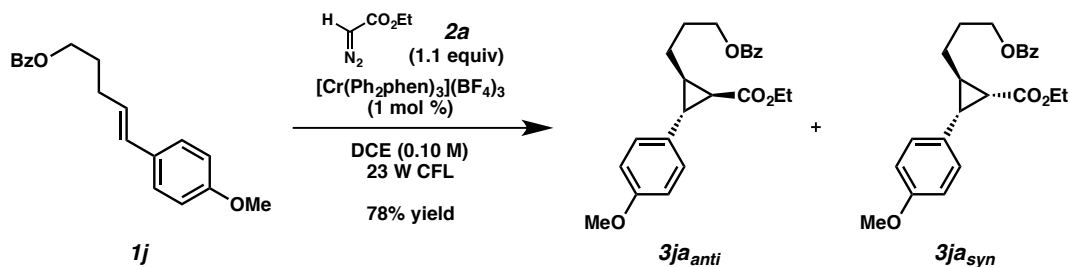

**Cyclopropane 3ja.** Prepared according to the *General Procedure* using 24.0 mg *E*-alkene **1j** (0.0810 mmol), 12.0 mg ethyl diazoacetate (85% wt. solution in  $\text{CH}_2\text{Cl}_2$ , 0.0891 mmol), 1.1 mg  $[\text{Cr}(\text{Ph}_2\text{phen})_3](\text{BF}_4)_3$  (0.810  $\mu\text{mol}$ ), and 0.8 mL DCE. The reaction mixture was irradiated for 9 h. Diastereomeric ratio (1.2:1 anti/syn) was determined by  $^1\text{H}$  NMR analysis of the crude mixture. The crude product was purified by flash chromatography (100% hexanes  $\rightarrow$  4:1 hexanes/EtOAc eluent) to afford cyclopropane **3ja** (24.1 mg, 78% yield) as a colorless oil.

**TLC:**  $R_f$  = 0.47 in 4:1 hexanes/EtOAc, visualized by UV.

**$^1\text{H}$  NMR** (400 MHz;  $\text{CDCl}_3$ ): **Major (anti):**  $\delta$  8.05 (d,  $J$  = 7.2 Hz, 2H), 7.58-7.54 (m, 1H), 7.47-7.42 (m, 2H), 7.02 (d,  $J$  = 8.8 Hz, 2H), 6.81 (d,  $J$  = 8.8 Hz, 2H), 4.39 (t,  $J$  = 6.4 Hz, 2H), 4.15 (q,  $J$  = 7.2 Hz, 2H), 3.78 (s, 3H), 2.45 (dd,  $J$  = 6.4, 5.6 Hz, 1H), 2.10-1.52 (comp. m, 6H), 1.27 (t,  $J$  = 7.2 Hz, 3H).

**Minor (syn):**  $\delta$  8.05 (d,  $J$  = 7.2 Hz, 2H), 7.58-7.54 (m, 1H), 7.47-7.42 (m, 2H), 7.16 (d,  $J$  = 8.2 Hz, 2H), 6.79 (d,  $J$  = 8.2 Hz,

2H), 4.35 (t,  $J = 5.8$  Hz, 2H), 3.90 (qd,  $J = 7.2, 0.8$  Hz, 2H), 3.77 (s, 3H), 2.36 (dd,  $J = 9.2, 7.0$  Hz, 1H), 2.10-1.52 (comp. m, 6H), 1.02 (t,  $J = 7.2$  Hz, 3H).

$^{13}\text{C}$  NMR (100 MHz;  $\text{CDCl}_3$ ):  $\delta$  171.9, 170.9, 166.7, 158.45, 158.38, 133.1, 133.0, 132.3, 130.7, 130.5, 130.4, 130.2, 129.7, 128.50, 128.46, 127.4, 114.1, 113.5, 97.5, 64.63, 64.58, 60.7, 60.3, 55.5, 55.3, 32.6, 31.1, 30.6, 29.6, 29.0, 28.7, 28.53, 28.46, 25.1, 23.6, 14.5, 14.3, 11.4.

IR (ATR, neat): 2935, 1717, 1515, 1452, 1272, 1247, 1175, 1111, 1026, 830, 711  $\text{cm}^{-1}$ .

HRMS (ESI+):  $m/z$  calc'd for  $(\text{M}+\text{H})^+$  [ $\text{C}_{23}\text{H}_{26}\text{O}_5 + \text{H}$ ] $^+$ : 383.1853, found 383.1847.

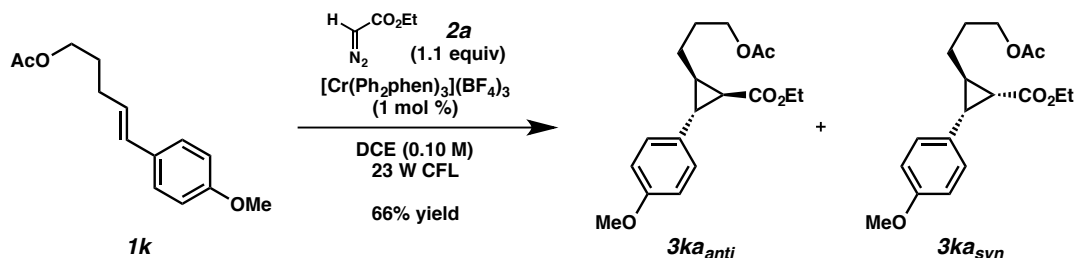

**Cyclopropane 3ka.** Prepared according to the *General Procedure* using 41.5 mg *E*-alkene **1k** (0.177 mmol), 26.1 mg ethyl diazoacetate (85% wt. solution in  $\text{CH}_2\text{Cl}_2$ , 0.195 mmol), 2.3 mg  $[\text{Cr}(\text{Ph}_2\text{phen})_3](\text{BF}_4)_3$  (1.77  $\mu\text{mol}$ ), and 1.8 mL DCE. The reaction mixture was irradiated for 48 h. Diastereomeric ratio (1.2:1 anti/syn) was determined by  $^1\text{H}$  NMR analysis of the crude mixture. The crude product was purified by flash chromatography (1:1 hexanes/ $\text{Et}_2\text{O}$  eluent) to afford cyclopropane **3ka** (37.6 mg, 66% yield) as a colorless oil.

TLC:  $R_f = 0.43$  in 1:1 hexanes/ $\text{Et}_2\text{O}$ , visualized by UV.

$^1\text{H}$  NMR (400 MHz;  $\text{CDCl}_3$ ): Major (anti):  $\delta$  7.01 (d,  $J = 8.6$  Hz, 2H), 6.82 (d,  $J = 8.6$  Hz, 2H), 4.16 (qd,  $J = 7.2, 0.8$  Hz, 2H), 4.13 (t,  $J = 6.4$  Hz, 2H), 3.78 (s, 3H), 2.42 (dd,  $J = 6.6, 5.0$  Hz, 1H), 2.03 (s, 3H), 1.97 (dd,  $J = 9.0, 5.0$  Hz, 1H), 1.86-1.80 (comp. m, 3H), 1.63-1.55 (comp. m, 2H), 1.28 (t,  $J = 7.2$  Hz, 3H).

Minor (syn):  $\delta$  7.15 (d,  $J = 8.4$  Hz, 2H), 6.79 (d,  $J = 8.4$  Hz, 2H), 4.09 (t,  $J = 6.0$  Hz, 2H), 3.90 (qd,  $J = 7.2, 0.8$  Hz, 2H), 3.77 (s, 3H), 2.33 (dd,  $J = 9.0, 7.0$  Hz, 1H), 2.05 (s, 3H), 2.02-1.97 (comp. m, 1H), 1.80-1.71 (comp. m, 3H), 1.50-1.43 (comp. m, 2H), 1.02 (t,  $J = 7.2$  Hz, 3H).

$^{13}\text{C}$  NMR (100 MHz;  $\text{CDCl}_3$ ):  $\delta$  171.8, 171.2, 170.8, 158.42, 158.36, 132.3, 130.2, 128.5, 127.4, 114.0, 113.5, 64.13, 64.11, 60.6, 60.3, 55.4, 55.3, 32.6, 31.1, 30.5, 29.5, 28.9, 28.6, 28.5, 28.2, 25.1, 23.4, 21.1, 14.4, 14.2.

IR (ATR, neat): 2963, 1729, 1517, 1454, 1368, 1244, 1174, 1033, 830  $\text{cm}^{-1}$ .

HRMS (ESI+):  $m/z$  calc'd for  $(\text{M}+\text{H})^+$  [ $\text{C}_{18}\text{H}_{24}\text{O}_5 + \text{H}$ ] $^+$ : 321.1697, found 321.1693.

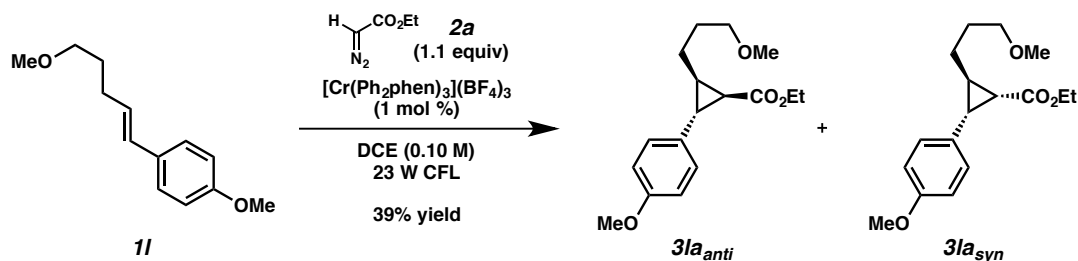

**Cyclopropane 3la.** Prepared according to the *General Procedure* using 21.2 mg *E*-alkene **1l** (0.103 mmol), 15.2 mg ethyl diazoacetate (85% wt. solution in  $\text{CH}_2\text{Cl}_2$ , 0.113 mmol), 1.3 mg  $[\text{Cr}(\text{Ph}_2\text{phen})_3](\text{BF}_4)_3$  (1.03  $\mu\text{mol}$ ), and 1.0 mL DCE. The reaction mixture was irradiated for 42 h. Diastereomeric ratio (1.1:1 anti/syn) was determined by  $^1\text{H}$  NMR analysis of the crude mixture. The crude product was purified by flash chromatography (100% hexanes  $\rightarrow$  7:1:1:1 hexanes/ $\text{EtOAc}/\text{Et}_2\text{O}/\text{CH}_2\text{Cl}_2$  eluent) to afford cyclopropane **3la** (11.7 mg, 39% yield) as a pale yellow oil.

TLC:  $R_f = 0.51$  in 7:1:1:1 hexanes/ $\text{EtOAc}/\text{Et}_2\text{O}/\text{CH}_2\text{Cl}_2$ , visualized by UV.

$^1\text{H}$  NMR (400 MHz;  $\text{CDCl}_3$ ): Major (anti):  $\delta$  7.02 (d,  $J = 8.4$  Hz, 2H), 6.81 (d,  $J = 8.4$  Hz, 2H), 4.16 (q,  $J = 7.2$  Hz, 2H), 3.78 (s, 3H), 3.44 (t,  $J = 6.2$  Hz, 2H), 3.33 (s, 3H), 2.41 (dd,  $J = 6.2, 5.2$  Hz, 1H), 1.95 (dd,  $J = 9.2, 5.2$  Hz, 1H), 1.83-1.57 (comp. m, 5H), 1.28 (t,  $J = 7.2$  Hz, 3H).

Minor (syn):  $\delta$  7.15 (d,  $J = 8.4$  Hz, 2H), 6.80 (d,  $J = 8.4$  Hz, 2H), 3.90 (qd,  $J = 7.2, 1.2$  Hz, 2H), 3.77 (s, 3H), 3.39 (t,  $J = 6.0$

Hz, 2H), 3.32 (s, 3H), 2.33 (dd,  $J = 9.2, 7.2$  Hz, 1H), 2.00-1.94 (comp. m, 1H), 1.83-1.57 (comp. m, 4H), 1.52-1.43 (comp. m, 1H), 1.03 (t,  $J = 7.2$  Hz, 3H).

$^{13}\text{C}$  NMR (100 MHz;  $\text{CDCl}_3$ ):  $\delta$  172.0, 171.1, 158.4, 143.5, 132.6, 130.3, 128.8, 127.4, 114.0, 113.5, 72.5, 72.2, 60.6, 60.3, 58.74, 58.68, 55.5, 55.3, 32.7, 31.2, 30.9, 29.59, 29.57, 29.2, 28.9, 28.6, 25.4, 23.6, 14.5, 14.3.

IR (ATR, neat): 2934, 1724, 1516, 1449, 1377, 1248, 1175, 1117, 1036  $\text{cm}^{-1}$ .

HRMS (ESI+):  $m/z$  calc'd for  $(\text{M}+\text{H})^+$  [ $\text{C}_{17}\text{H}_{24}\text{O}_4 + \text{H}$ ] $^+$ : 293.1747, found 293.1746.

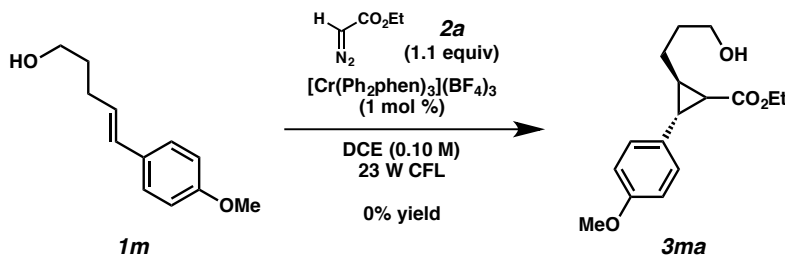

**Cyclopropane 3ma.** Reaction performed according to the *General Procedure* using 19.2 mg of *E*-alkene **1m** (0.0999 mmol), 14.7 mg ethyl diazoacetate (85% wt. solution in  $\text{CH}_2\text{Cl}_2$ , 0.113 mmol), 1.3 mg  $[\text{Cr}(\text{Ph}_2\text{phen})_3](\text{BF}_4)_3$  (0.999  $\mu\text{mol}$ ), and 1.0 mL DCE. The reaction mixture was irradiated for 40 h. Cyclopropane **3ma** was not observed.

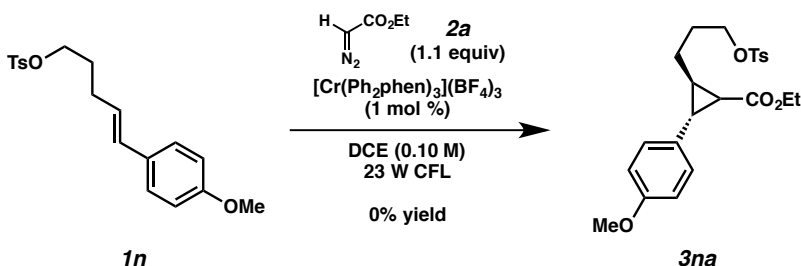

**Cyclopropane 3na.** Reaction performed according to the *General Procedure* using 35.6 mg of *E*-alkene **1n** (0.103 mmol), 15.2 mg ethyl diazoacetate (85% wt. solution in  $\text{CH}_2\text{Cl}_2$ , 0.113 mmol), 1.3 mg  $[\text{Cr}(\text{Ph}_2\text{phen})_3](\text{BF}_4)_3$  (1.03  $\mu\text{mol}$ ), and 1.0 mL DCE. The reaction mixture was irradiated for 43 h. Cyclopropane **3na** was not observed. Instead, a product resulting from a tosyloxy transfer to ethyl diazoacetate<sup>4</sup> was observed.

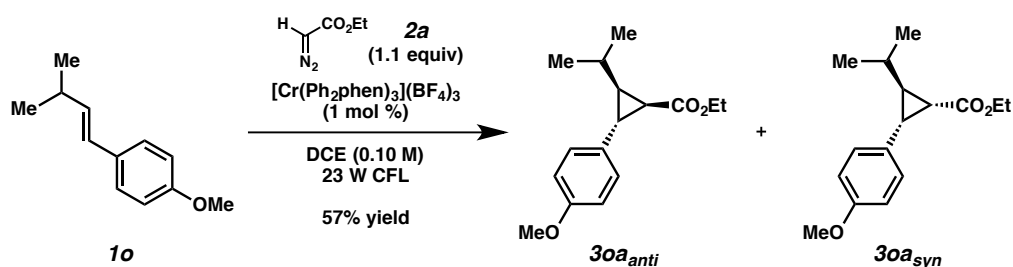

**Cyclopropane 3oa.** Prepared according to the *General Procedure* using 18.8 mg *E*-alkene **1o** (0.107 mmol), 15.8 mg ethyl diazoacetate (85% wt. solution in  $\text{CH}_2\text{Cl}_2$ , 0.118 mmol), 1.4 mg  $[\text{Cr}(\text{Ph}_2\text{phen})_3](\text{BF}_4)_3$  (0.999  $\mu\text{mol}$ ), and 1.1 mL DCE. The reaction mixture was irradiated for 17 h. Diastereomeric ratio (1:1.1 anti/syn) was determined by  $^1\text{H}$  NMR analysis of the crude mixture. The crude product was purified by flash chromatography (100% hexanes  $\rightarrow$  9:1 hexanes/ $\text{Et}_2\text{O}$  eluent) to afford *trans*-cyclopropane **3oa** (15.9 mg, 57% yield) as a colorless oil.

TLC:  $R_f = 0.29$  in 9:1 hexanes/ $\text{Et}_2\text{O}$ , visualized by UV. Stained blue by *p*-anisaldehyde.

$^1\text{H}$  NMR (400 MHz;  $\text{CDCl}_3$ ): Major (syn):  $\delta$  7.03 (d,  $J = 8.4$  Hz, 2H), 6.81 (d,  $J = 8.4$  Hz, 2H), 4.17 (qd,  $J = 5.4, 7.0$  Hz, 2H), 3.77 (s, 3H), 2.36 (app. t,  $J = 8.0$  Hz, 1H), 1.88-1.80 (comp. m, 3H), 1.28 (t,  $J = 7.0$  Hz, 3H), 1.09 (d,  $J = 6.4$  Hz, 6H).

Minor (anti):  $\delta$  7.15 (d,  $J = 8.6$  Hz, 2H), 6.80 (d,  $J = 8.6$  Hz, 2H), 3.90 (q,  $J = 7.2$  Hz, 2H), 3.78 (s, 3H), 2.46 (dd,  $J = 6.4,$

5.1 Hz, 1H), 1.95 (dd,  $J = 9.4, 5.1$  Hz, 1H), 1.34-1.20 (comp. m, 2H), 1.06 (d,  $J = 6.8$  Hz, 3H), 1.02 (t,  $J = 7.2$  Hz, 3H), 0.92 (d,  $J = 6.8$  Hz, 3H).

$^{13}\text{C}$  NMR (125 MHz;  $\text{CDCl}_3$ ):  $\delta$  172.2, 171.3, 158.4, 158.3, 132.8, 130.3, 129.1, 127.6, 114.0, 113.5, 60.6, 60.2, 55.5, 55.3, 39.3, 33.7, 32.2, 31.8, 30.9, 28.7, 28.0, 26.8, 22.7, 22.3, 21.9, 14.5, 14.3.

IR (ATR, neat): 2959, 1731, 1518, 1247, 1178, 1159, 1038  $\text{cm}^{-1}$ .

HRMS (ESI+):  $m/z$  calc'd for  $(\text{M} + \text{Na})^+$  [ $\text{C}_{16}\text{H}_{22}\text{O}_3 + \text{Na}$ ] $^+$ : 285.1461, found 285.1461.

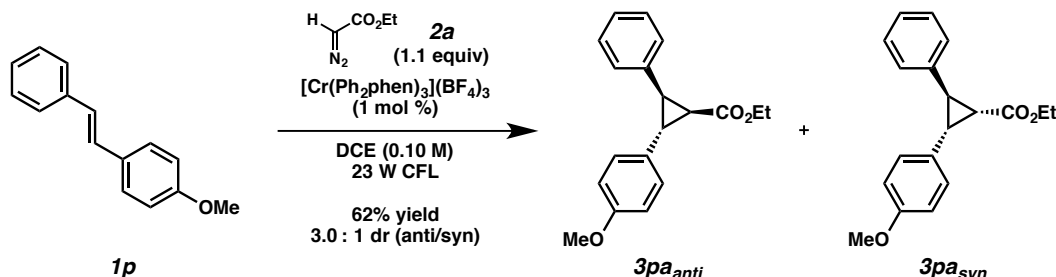

**Cyclopropane 3pa.** Prepared according to the *General Procedure* using 20.8 mg *E*-alkene **1p** (0.0989 mmol), 14.6 mg ethyl diazoacetate (85% wt. solution in  $\text{CH}_2\text{Cl}_2$ , 0.109 mmol), 1.3 mg  $[\text{Cr}(\text{Ph}_2\text{phen})_3](\text{BF}_4)_3$  (0.989  $\mu\text{mol}$ ), and 1.0 mL DCE. The reaction mixture was irradiated for 72 h. Diastereomeric ratio (3.0:1 anti/syn) was determined by  $^1\text{H}$  NMR analysis of the crude mixture. The crude product was purified by flash chromatography (100% hexanes  $\rightarrow$  9:1 hexanes/EtOAc eluent) to afford cyclopropane **3pa** (18.2 mg, 62% yield) as a colorless oil.

TLC:  $R_f = 0.21$  in 9:1 hexanes/Et $_2$ O, visualized by UV.

$^1\text{H}$  NMR (400 MHz;  $\text{CDCl}_3$ ): Major (anti):  $\delta$  7.38-6.83 (comp. m, 9H), 4.00-3.90 (comp. m, 2H), 3.80 (s, 3H), 3.18 (dd,  $J = 7.2, 5.2$  Hz, 1H), 2.88 (dd,  $J = 7.2, 5.2$  Hz, 1H), 2.39-2.32 (comp. m, 1H), 1.10-1.02 (comp. m, 3H).

Minor (syn):  $\delta$  7.38-6.83 (comp. m, 9H), 4.00-3.90 (comp. m, 2H), 3.79 (s, 3H), 3.19 (dd,  $J = 7.2, 5.2$  Hz, 1H), 2.88 (dd,  $J = 7.2, 5.2$  Hz, 1H), 2.39-2.32 (comp. m, 1H), 1.10-1.02 (comp. m, 3H).

$^{13}\text{C}$  NMR (100 MHz;  $\text{CDCl}_3$ ):  $\delta$  170.3, 158.6, 143.5, 136.4, 132.7, 131.7, 130.3, 129.3, 128.7, 128.3, 128.2, 128.0, 127.0, 126.7, 114.6, 114.2, 113.7, 113.6, 60.60, 60.56, 55.5, 55.3, 34.3, 34.0, 31.4, 31.2, 29.6, 28.8, 14.3, 14.2.

IR (ATR, neat): 2980, 1724, 1516, 1248, 1177, 1036, 827, 696  $\text{cm}^{-1}$ .

HRMS (ESI+):  $m/z$  calc'd for  $(\text{M} + \text{H})^+$  [ $\text{C}_{19}\text{H}_{20}\text{O}_3 + \text{H}$ ] $^+$ : 297.1485, found 297.1482.

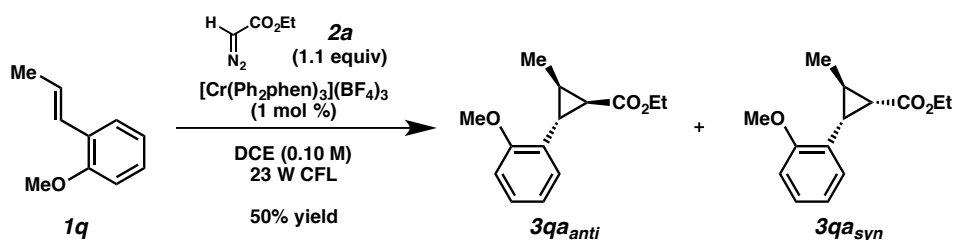

**Cyclopropane 3qa.** Prepared according to the *General Procedure* using 16.5 mg *E*-alkene **1q** (0.111 mmol), 16.4 mg ethyl diazoacetate (85% wt. solution in  $\text{CH}_2\text{Cl}_2$ , 0.122 mmol), 1.5 mg  $[\text{Cr}(\text{Ph}_2\text{phen})_3](\text{BF}_4)_3$  (1.11  $\mu\text{mol}$ ), and 1.10 mL DCE. The reaction mixture was irradiated for 27 h. Diastereomeric ratio (1:1.2 anti/syn) was determined by  $^1\text{H}$  NMR analysis of the crude mixture. The crude product was purified by flash chromatography (100% hexanes  $\rightarrow$  3:1 hexanes/Et $_2$ O eluent) to afford cyclopropane **3qa** (18.2 mg, 50% yield) as a colorless oil.

TLC:  $R_f = 0.55$  in 3:1 hexanes/Et $_2$ O, visualized by UV.

$^1\text{H}$  NMR (400 MHz;  $\text{CDCl}_3$ ): Major (syn):  $\delta$  7.21-7.17 (comp. m, 2H), 6.88 (app. td,  $J = 7.6, 2.4$  Hz, 1H), 6.80 (d,  $J = 7.6$  Hz, 1H), 3.88 (q,  $J = 7.2$  Hz, 2H), 3.80 (s, 3H), 2.29 (dd,  $J = 9.2, 7.2$  Hz, 1H), 2.00-1.92 (comp. m, 1H), 1.84 (dd,  $J = 9.2, 5.2$  Hz, 1H), 1.28 (d,  $J = 6.0$  Hz, 3H), 1.00 (t,  $J = 7.2$  Hz, 3H).

Minor (anti):  $\delta$  7.17 (ddd,  $J = 8.4, 6.8, 2.6$  Hz, 1H), 6.90-6.83 (comp. m, 3H), 4.18 (m, 2H), 3.83 (s, 3H), 2.63 (dd,  $J = 6.8, 5.2$  Hz, 1H), 1.97 (dd,  $J = 9.2, 5.2$  Hz, 1H), 1.67-1.61 (comp. m, 1H), 1.36 (d,  $J = 6.0$  Hz, 2H), 1.29 (t,  $J = 7.2$  Hz, 3H).

$^{13}\text{C}$  NMR (100 MHz;  $\text{CDCl}_3$ ):  $\delta$  172.3, 171.6, 158.7, 130.3, 129.0, 127.9, 127.4, 126.0, 125.5, 120.5, 120.1, 110.5, 109.9, 60.4, 59.9, 55.6, 55.4, 31.7, 29.9, 29.3, 27.9, 27.4, 24.5, 20.2, 18.0, 14.6, 14.3, 12.3.

IR (ATR, neat): 2978, 1724, 1497, 1248, 1180, 1163, 1030, 750  $\text{cm}^{-1}$ .

HRMS (ESI+):  $m/z$  calc'd for  $(\text{M}+\text{H})^+$   $[\text{C}_{14}\text{H}_{18}\text{O}_3 + \text{H}]^+$ : 235.1329, found 235.1330.

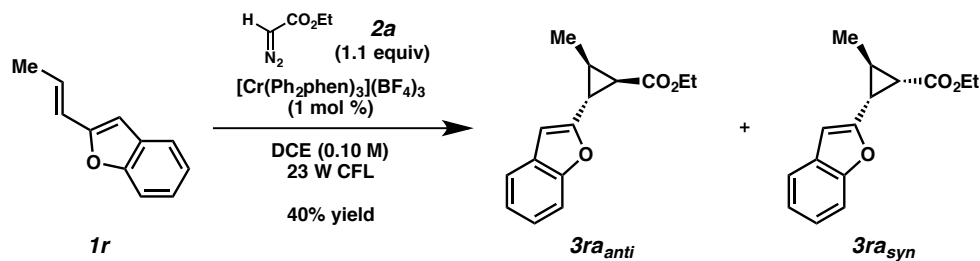

**Cyclopropane 3ra.** Prepared according to the *General Procedure* using 17.3 mg alkene **1r** (0.109 mmol, 9:1 *E/Z* mixture), 16.1 mg ethyl diazoacetate (85% wt. solution in  $\text{CH}_2\text{Cl}_2$ , 0.120 mmol), 1.4 mg  $[\text{Cr}(\text{Ph}_2\text{phen})_3](\text{BF}_4)_3$  (1.09  $\mu\text{mol}$ ), and 1.1 mL DCE. Diastereomeric ratio (1:1.1 anti/syn) was determined by  $^1\text{H}$  NMR analysis of the crude mixture. The reaction mixture was irradiated for 36 h. The crude product was purified by flash chromatography (100% hexanes  $\rightarrow$  9:1 hexanes/ $\text{Et}_2\text{O}$  eluent) to afford *trans*-cyclopropane **3ra** (10.7 mg, 40% yield) as a colorless oil.

TLC:  $R_f$  = 0.47 in 9:1 hexanes/ $\text{EtOAc}$ , visualized by UV. Stained pink by *p*-anisaldehyde.

$^1\text{H}$  NMR (400 MHz;  $\text{CDCl}_3$ ): Major (syn):  $\delta$  7.48-7.44 (m, 1H), 7.39-7.34 (m, 1H), 7.21-7.15 (m, 2H), 6.50 (s, 1H), 4.18 (dq,  $J$  = 7.2, 5.2 Hz, 2H), 2.34 (dd,  $J$  = 8.6, 6.6 Hz, 1H), 2.12 (app. quintet,  $J$  = 6.0 Hz, 1H), 1.92-1.89 (m, 1H), 1.31 (d,  $J$  = 6.4 Hz, 3H), 1.03 (t,  $J$  = 7.2 Hz, 3H).

Minor (anti):  $\delta$  7.48-7.44 (m, 1H), 7.39-7.34 (m, 2H), 7.21-7.15 (m, 2H), 6.44 (s, 1H), 3.95 (dq,  $J$  = 7.2, 3.6 Hz, 2H), 2.53 (dd,  $J$  = 6.2, 5.0 Hz, 1H), 2.28 (dd,  $J$  = 9.6, 5.0 Hz, 1H), 1.96-1.92 (m, 1H), 1.36 (d,  $J$  = 6.4 Hz, 3H), 1.29 (t,  $J$  = 7.2 Hz, 3H).

$^{13}\text{C}$  NMR (125 MHz;  $\text{CDCl}_3$ ):  $\delta$  171.1, 170.3, 156.8, 154.7, 154.5, 154.4, 128.9, 123.6, 123.5, 122.8, 122.6, 120.7, 120.3, 111.0, 110.83, 110.81, 104.3, 102.0, 60.9, 60.6, 29.9, 27.8, 26.5, 25.7, 23.6, 20.6, 17.5, 14.5, 14.2, 11.7.

IR (ATR, neat): 2961, 1728, 1454, 1257, 1184, 750  $\text{cm}^{-1}$ .

HRMS (ESI+):  $m/z$  calc'd for  $(\text{M} + \text{Na})^+$   $[\text{C}_{15}\text{H}_{16}\text{O}_3 + \text{Na}]^+$ : 267.0992, found 267.0993.

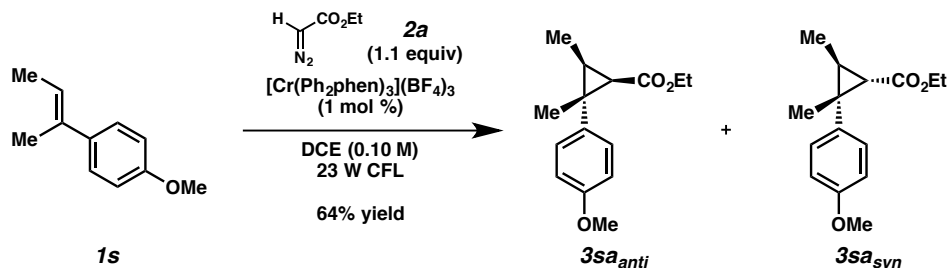

**Cyclopropane 3sa.** Prepared according to the *General Procedure* using 16.2 mg (*E*)-alkene **1s** (0.0999 mmol), 14.7 mg ethyl diazoacetate (85% wt. solution in  $\text{CH}_2\text{Cl}_2$ , 0.110 mmol), 1.3 mg  $[\text{Cr}(\text{Ph}_2\text{phen})_3](\text{BF}_4)_3$  (0.999  $\mu\text{mol}$ ), and 1.0 mL DCE. The reaction mixture was irradiated for 14 h. Diastereomeric ratio (1:1.2 anti/syn) was determined by  $^1\text{H}$  NMR analysis of the crude mixture. The crude product was purified by flash chromatography (100% hexanes  $\rightarrow$  9:1 hexanes/ $\text{EtOAc}$  eluent) to afford *trans*-cyclopropane **3sa** (15.9 mg, 64% yield) as a colorless oil.

TLC:  $R_f$  = 0.41 in 9:1 hexanes/ $\text{EtOAc}$ , visualized by UV.

$^1\text{H}$  NMR (400 MHz;  $\text{CDCl}_3$ ): Major (syn):  $\delta$  7.14 (d,  $J$  = 8.6 Hz, 2H), 6.80 (d,  $J$  = 8.6 Hz, 2H), 3.91-3.84 (m, 2H), 3.77 (s, 3H), 2.05 (app. quintet,  $J$  = 6.3 Hz, 1H), 1.49 (d,  $J$  = 5.6 Hz, 1H), 1.41 (s, 3H), 1.28 (d,  $J$  = 6.3 Hz, 3H), 1.02 (t,  $J$  = 7.0 Hz, 3H).

Minor (anti):  $\delta$  7.20 (d,  $J$  = 8.8 Hz, 2H), 6.83 (d,  $J$  = 8.8 Hz, 2H), 4.18-4.12 (dq,  $J$  = 7.2, 1.2 Hz, 2H), 3.79 (s, 3H), 1.87 (d,  $J$  = 8.8 Hz, 1H), 1.71-1.63 (comp. m, 1H), 1.48 (s, 3H), 1.38 (d,  $J$  = 6.8 Hz, 3H), 1.29 (t,  $J$  = 7.2 Hz, 3H).

$^{13}\text{C}$  NMR (100 MHz;  $\text{CDCl}_3$ ):  $\delta$  171.82, 171.77, 158.2, 158.1, 140.5, 136.2, 129.8, 128.6, 113.9, 113.7, 60.2, 60.0, 55.4, 55.3, 36.1, 35.5, 33.2, 29.0, 26.4, 24.7, 23.0, 15.7, 14.6, 14.3, 12.8, 8.4.

IR (ATR, neat): 2976, 1724, 1516, 1244, 1171, 1036, 831  $\text{cm}^{-1}$ .

HRMS (ESI+):  $m/z$  calc'd for  $(\text{M} + \text{H})^+$   $[\text{C}_{15}\text{H}_{20}\text{O}_3 + \text{H}]^+$ : 249.1485, found 249.1488.



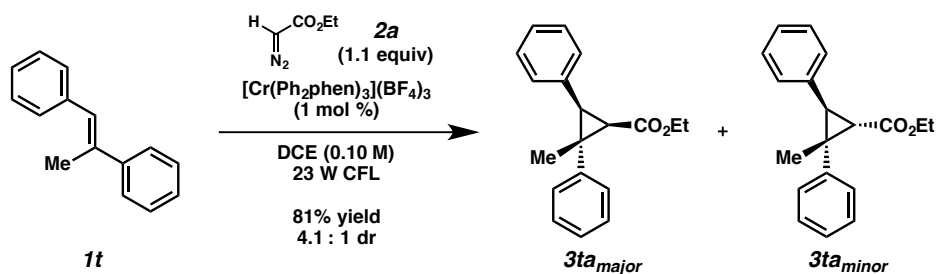

**Cyclopropane 3ta.** Prepared according to the *General Procedure* using 19.5 mg *E*-alkene **1t** (0.100 mmol), 14.8 mg ethyl diazoacetate (85% wt. solution in  $\text{CH}_2\text{Cl}_2$ , 0.110 mmol), 1.3 mg  $[\text{Cr}(\text{Ph}_2\text{phen})_3](\text{BF}_4)_3$  (1.00  $\mu\text{mol}$ ), and 1.0 mL DCE. The reaction mixture was irradiated for 14 h. Diastereomeric ratio (4.1:1 major/minor) was determined by  $^1\text{H}$  NMR analysis of the crude mixture. The crude product was purified by flash chromatography (100% petroleum ether  $\rightarrow$  9:1 petroleum ether/EtOAc eluent) to afford cyclopropane **3ta** (22.9 mg, 81% yield) as a colorless oil.

TLC:  $R_f = 0.47$  in 9:1 hexanes/Et<sub>2</sub>O, visualized by UV.

$^1\text{H}$  NMR (400 MHz;  $\text{CDCl}_3$ ): Major:  $\delta$  7.43-7.17 (m, 10H), 4.19-4.10 (m, 2H), 2.97 (d,  $J = 9.6$  Hz, 1H), 2.37 (d,  $J = 9.6$  Hz, 1H), 1.54 (s, 3H), 1.26 (t,  $J = 7.2$  Hz, 3H).

Minor:  $\delta$  7.43-7.17 (m, 10H), 3.98-3.88 (m, 2H), 3.40 (d,  $J = 5.8$  Hz, 1H), 2.33 (d,  $J = 5.8$  Hz, 1H), 1.20 (s, 3H), 1.01 (t,  $J = 7.2$  Hz, 3H).

$^{13}\text{C}$  NMR (100 MHz;  $\text{CDCl}_3$ ):  $\delta$  170.6, 147.6, 136.8, 135.1, 130.5, 129.2, 128.8, 128.5, 128.2, 127.8, 126.8, 60.5, 60.3, 38.3, 35.6, 35.1, 35.0, 33.0, 30.4, 24.0, 18.4, 14.5, 14.2.

IR (ATR, neat): 2980, 1732, 1445, 1152, 1053, 764, 698  $\text{cm}^{-1}$ .

HRMS (ESI+):  $m/z$  calc'd for  $(\text{M} + \text{H})^+ [\text{C}_{19}\text{H}_{20}\text{O}_2 + \text{H}]^+$ : 281.1536, found 281.1537.

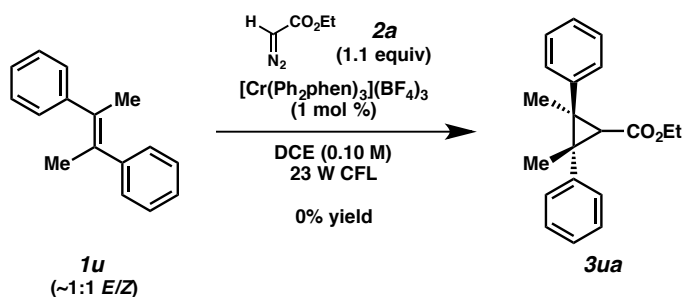

**Cyclopropane 3ua.** Reaction performed according to the *General Procedure* using 21.5 mg of alkene **1u** (0.103 mmol), 15.2 mg ethyl diazoacetate (85% wt. solution in  $\text{CH}_2\text{Cl}_2$ , 0.114 mmol), 1.3 mg  $[\text{Cr}(\text{Ph}_2\text{phen})_3](\text{BF}_4)_3$  (1.03  $\mu\text{mol}$ ), and 1.0 mL DCE. The reaction mixture was irradiated for 72 h. Cyclopropane **3ua** was not observed.

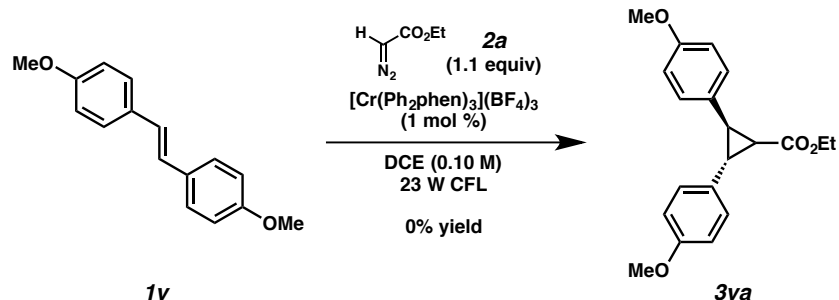

**Cyclopropane 3va.** Reaction performed according to the *General Procedure* using 24.0 mg of *E*-alkene **1v** (0.0999 mmol), 14.7 mg ethyl diazoacetate (85% wt. solution in  $\text{CH}_2\text{Cl}_2$ , 0.113 mmol), 1.3 mg  $[\text{Cr}(\text{Ph}_2\text{phen})_3](\text{BF}_4)_3$  (0.999  $\mu\text{mol}$ ), and 1.0 mL DCE. The reaction mixture was irradiated for 53 h. Cyclopropane **3va** was not observed.

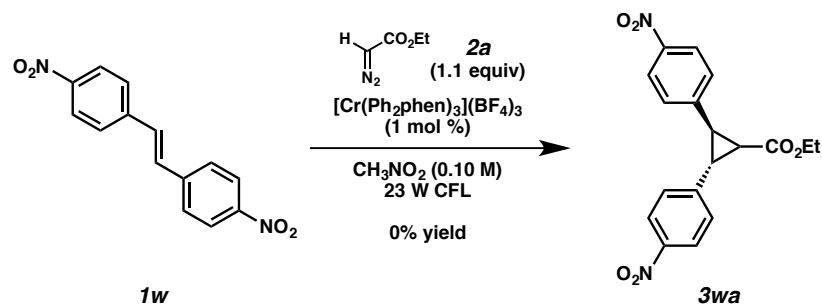

**Cyclopropane 3wa.** Reaction performed according to the *General Procedure* using 27.0 mg of *E*-alkene **1w** (0.0999 mmol), 14.7 mg ethyl diazoacetate (85% wt. solution in  $\text{CH}_2\text{Cl}_2$ , 0.113 mmol), 1.3 mg  $[\text{Cr}(\text{Ph}_2\text{phen})_3](\text{BF}_4)_3$  (0.999  $\mu\text{mol}$ ), and 1.0 mL  $\text{CH}_3\text{NO}_2$ . The reaction mixture was irradiated for 24 h. Cyclopropane **3wa** was not observed.

## Diazo Scope

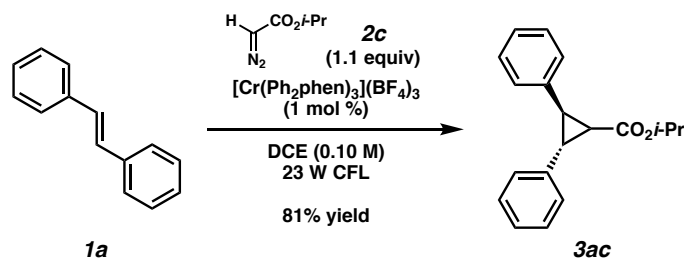

**Cyclopropane 3ac.** Prepared according to the *General Procedure* using 18.1 mg *trans*-stilbene (0.100 mmol), 14.8 mg diazoacetate **2c** (0.110 mmol), 1.3 mg  $[\text{Cr}(\text{Ph}_2\text{phen})_3](\text{BF}_4)_3$  (1.00  $\mu\text{mol}$ ), and 1.0 mL DCE. The reaction mixture was irradiated for 24 h. The crude product was purified by flash chromatography (100% hexanes  $\rightarrow$  9:1 hexanes/acetone eluent) to afford cyclopropane **3ac** (22.7 mg, 81% yield) as a colorless oil.

**TLC:**  $R_f$  = 0.52 in 9:1 hexanes/acetone, visualized by UV.

**$^1\text{H NMR}$**  (400 MHz;  $\text{CDCl}_3$ ):  $\delta$  7.35-7.21 (m, 10H), 4.84-4.75 (app. septet,  $J$  = 6.2 Hz, 1H), 3.21 (dd,  $J$  = 6.8, 5.2 Hz, 1H), 2.92 (dd,  $J$  = 9.6, 6.8 Hz, 1H), 2.40 (dd,  $J$  = 9.6, 5.2 Hz, 1H), 1.04 (d,  $J$  = 6.4 Hz, 3H), 0.97 (d,  $J$  = 6.0 Hz, 3H).

**$^{13}\text{C NMR}$**  (100 MHz;  $\text{CDCl}_3$ ):  $\delta$  169.6, 139.8, 136.3, 129.3, 128.7, 128.2, 127.0, 126.8, 68.0, 34.5, 31.6, 29.0, 22.0, 21.6.

**IR** (ATR, neat): 2978, 1721, 1179, 1105, 750, 696  $\text{cm}^{-1}$ .

**HRMS** (ESI+):  $m/z$  calc'd for  $(\text{M} + \text{H})^+$   $[\text{C}_{19}\text{H}_{20}\text{O}_2 + \text{H}]^+$ : 281.1536, found 281.1536.

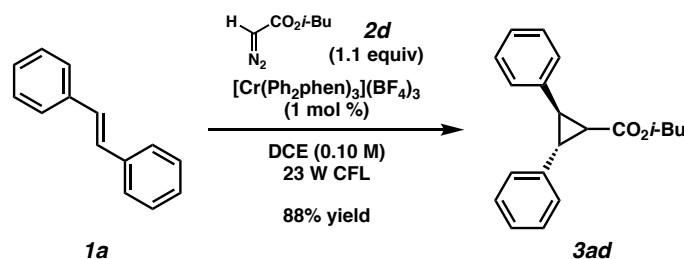

**Cyclopropane 3ad.** Prepared according to the *General Procedure* using 18.1 mg *trans*-stilbene (0.100 mmol), 15.7 mg diazoacetate **2d** (0.110 mmol), 1.3 mg  $[\text{Cr}(\text{Ph}_2\text{phen})_3](\text{BF}_4)_3$  (1.00  $\mu\text{mol}$ ), and 1.0 mL DCE. The reaction mixture was irradiated for 60 h. The crude product was purified by flash chromatography (100% hexanes  $\rightarrow$  19:1 hexanes/acetone eluent) to afford cyclopropane **3ad** (25.9 mg, 88% yield) as a colorless oil.

**TLC:**  $R_f$  = 0.28 in hexanes/ $\text{Et}_2\text{O}$ , visualized by UV.

**$^1\text{H NMR}$**  (400 MHz;  $\text{CDCl}_3$ ):  $\delta$  7.40-7.23 (m, 10H), 3.74-3.62 (m, 2H), 3.21 (dd,  $J$  = 7.0, 5.2 Hz, 1H), 2.94 (dd,  $J$  = 9.6, 7.0 Hz, 1H), 2.44 (dd,  $J$  = 9.6, 5.2 Hz, 1H), 1.71 (app. septet,  $J$  = 6.6 Hz, 1H), 0.79 (d,  $J$  = 6.4 Hz, 6H).

**$^{13}\text{C NMR}$**  (100 MHz;  $\text{CDCl}_3$ ):  $\delta$  170.2, 139.8, 136.3, 129.3, 128.8, 128.3, 127.1, 126.82, 126.77, 70.9, 34.6, 31.5, 29.4, 27.7, 19.12, 19.10.

**IR** (ATR, neat): 2961, 1728, 1171, 752, 696  $\text{cm}^{-1}$ .

**HRMS** (ESI+):  $m/z$  calc'd for  $(\text{M} + \text{H})^+$   $[\text{C}_{20}\text{H}_{22}\text{O}_2 + \text{H}]^+$ : 295.1693, found 295.1693.

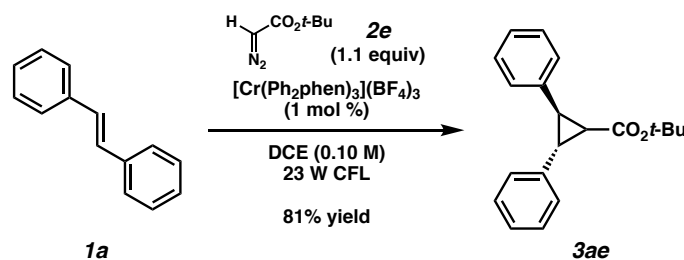

**Cyclopropane 3ae.** Prepared according to the *General Procedure* using 17.7 mg *trans*-stilbene (0.0982 mmol), 15.4 mg diazoacetate **2e** (0.108 mmol), 1.3 mg  $[\text{Cr}(\text{Ph}_2\text{phen})_3](\text{BF}_4)_3$  (0.982  $\mu\text{mol}$ ), and 1.0 mL DCE. The reaction mixture was irradiated for 48 h. The crude product was purified by flash chromatography (100% hexanes  $\rightarrow$  19:1 hexanes/acetone eluent) to afford *trans*-cyclopropane **3ae** (20.2 mg, 70% yield) as a colorless oil.

TLC:  $R_f$  = 0.32 in 19:1 hexanes/acetone, visualized by UV.

$^1\text{H NMR}$  (400 MHz;  $\text{CDCl}_3$ ):  $\delta$  7.37-7.23 (m, 10H), 3.15 (dd,  $J$  = 6.8, 5.2 Hz, 1H), 2.88 (dd,  $J$  = 9.6, 6.8 Hz, 1H), 2.35 (dd,  $J$  = 9.6, 5.2 Hz, 1H), 1.21 (s, 9H).

$^{13}\text{C NMR}$  (100 MHz;  $\text{CDCl}_3$ ):  $\delta$  169.2, 140.1, 136.5, 129.5, 128.7, 128.1, 126.9, 126.8, 126.7, 80.7, 34.4, 32.4, 28.8, 28.0.

IR (ATR, neat): 2976, 1724, 1497, 1366, 1144, 741, 696  $\text{cm}^{-1}$ .

HRMS (ESI+):  $m/z$  calc'd for  $(\text{M} + \text{H})^+$   $[\text{C}_{20}\text{H}_{22}\text{O}_2 + \text{H}]^+$ : 295.1693, found 295.1693.

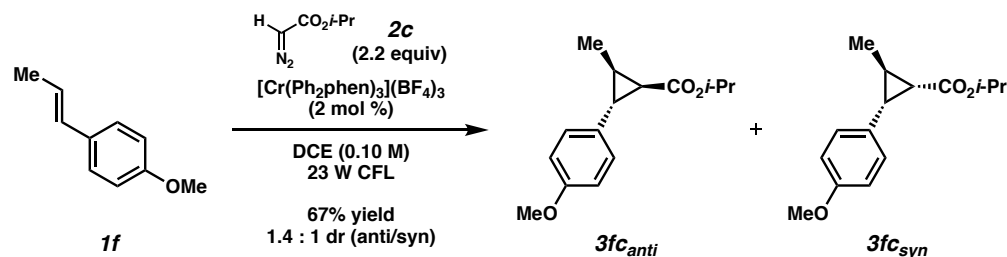

**Cyclopropane 3fc.** Prepared with a modification to the *General Procedure* using 15.4 mg *trans*-anethole (0.104 mmol), 14.6 mg diazoacetate **2c** (0.114 mmol), 1.4 mg  $[\text{Cr}(\text{Ph}_2\text{phen})_3](\text{BF}_4)_3$  (1.04  $\mu\text{mol}$ ), and 1.0 mL DCE. The reaction mixture was irradiated for 36 h. Then, an additional 1.3 mg (1.04  $\mu\text{mol}$ ) of catalyst and 14.6 mg (0.114 mmol) of diazoacetate were added to the mixture, and the reaction mixture was irradiated for another 33 h. Diastereomeric ratio (1.4:1 anti/syn) was determined by  $^1\text{H NMR}$  analysis of the crude mixture. The crude product was purified by flash chromatography (100% hexanes  $\rightarrow$  9:1 hexanes/EtOAc eluent) to afford cyclopropane **3fc** (17.3 mg, 67% yield) as a colorless oil.

TLC:  $R_f$  = 0.41 in 9:1 hexanes/EtOAc, visualized by UV.

$^1\text{H NMR}$  (400 MHz;  $\text{CDCl}_3$ ): Major (anti):  $\delta$  7.01 (d,  $J$  = 8.6 Hz, 2H), 6.81 (d,  $J$  = 8.6 Hz, 2H), 5.04 (app. septet,  $J$  = 6.4 Hz, 1H), 3.78 (s, 3H), 2.35 (dd,  $J$  = 6.2, 5.0 Hz, 1H), 1.91 (dd,  $J$  = 9.2, 5.0 Hz, 1H), 1.62-1.58 (comp. m, 1H), 1.33 (d,  $J$  = 6.4 Hz, 3H), 1.25 (d,  $J$  = 6.4 Hz, 6H).

Minor (syn):  $\delta$  7.15 (d,  $J$  = 8.6 Hz, 2H), 6.79 (d,  $J$  = 8.6 Hz, 2H), 4.74 (app. septet,  $J$  = 6.1 Hz, 1H), 3.77 (s, 3H), 2.28 (dd,  $J$  = 9.2, 6.8 Hz, 1H), 2.01 (app. sextet,  $J$  = 6.2 Hz, 1H), 1.74 (dd,  $J$  = 9.2, 5.2 Hz, 1H), 1.25 (d,  $J$  = 6.2 Hz, 3H), 1.00 (d,  $J$  = 6.1 Hz, 3H), 0.97 (d,  $J$  = 6.1 Hz, 3H).

$^{13}\text{C NMR}$  (100 MHz;  $\text{CDCl}_3$ ):  $\delta$  171.4, 158.2, 136.6, 132.9, 130.3, 129.5, 129.0, 127.7, 127.2, 114.0, 113.4, 67.9, 67.4, 55.5, 55.3, 33.6, 31.6, 30.3, 29.6, 25.3, 22.2, 22.1, 21.6, 19.6, 17.9, 12.1.

IR (ATR, neat): 2980, 1721, 1516, 1248, 1175, 1146, 1109, 1038  $\text{cm}^{-1}$ .

HRMS (ESI+):  $m/z$  calc'd for  $(\text{M} + \text{H})^+$   $[\text{C}_{15}\text{H}_{20}\text{O}_3 + \text{H}]^+$ : 249.1485, found 249.1486.

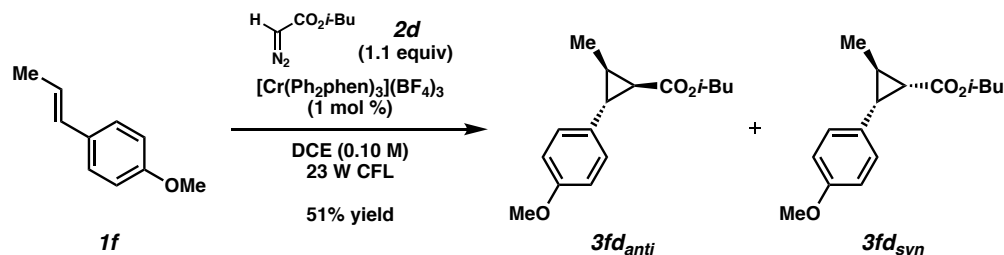

**Cyclopropane 3fd.** Prepared according to the *General Procedure* using 15.5 mg *trans*-anethole (0.105 mmol), 16.4 mg diazoacetate **2d** (0.115 mmol), 1.4 mg  $[\text{Cr}(\text{Ph}_2\text{phen})_3](\text{BF}_4)_3$  (1.05  $\mu\text{mol}$ ), and 1.1 mL DCE. The reaction mixture was irradiated for 60 h. Diastereomeric ratio (1.1:1 anti/syn) was determined by  $^1\text{H NMR}$  analysis of the crude mixture. The crude product was purified by flash chromatography (100% hexanes  $\rightarrow$  9:1 hexanes/EtOAc eluent) to afford *trans*-cyclopropane **3fd** (14.0 mg, 51% yield) as a colorless oil.

TLC:  $R_f$  = 0.33 in 9:1 hexanes/ $\text{Et}_2\text{O}$ , visualized by UV.

**<sup>1</sup>H NMR** (400 MHz; CDCl<sub>3</sub>): Major (anti): δ 7.01 (d, *J* = 8.6 Hz, 2H), 6.82 (d, *J* = 8.6 Hz, 2H), 3.94-3.87 (m, 2H), 3.78 (s, 3H), 2.37 (dd, *J* = 6.0, 5.2 Hz, 1H), 1.98-1.91 (comp. m, 2H), 1.64-1.60 (comp. m, 1H), 1.34 (d, *J* = 6.4 Hz, 3H), 0.95 (d, *J* = 6.8 Hz, 6H).

Minor (syn): δ 7.15 (d, *J* = 8.8 Hz, 2H), 6.79 (d, *J* = 8.8 Hz, 2H), 3.77 (m, 3H), 3.68-3.56 (m, 2H), 2.29 (dd, *J* = 9.2, 7.0 Hz, 1H), 2.03-1.99 (m, 1H), 1.79 (dd, *J* = 9.2, 5.2 Hz, 1H), 1.72-1.65 (m, 1H), 1.26 (d, *J* = 6.0 Hz, 3H), 0.77 (d, *J* = 6.4 Hz, 6H).

**<sup>13</sup>C NMR** (100 MHz; CDCl<sub>3</sub>): δ 172.0, 171.3, 158.4, 158.3, 132.8, 130.2, 128.9, 127.3, 114.0, 113.5, 70.8, 70.5, 55.5, 55.3, 33.7, 31.9, 30.1, 29.3, 27.9, 27.7, 25.3, 20.0, 19.3, 19.1, 17.9, 12.2.

**IR** (ATR, neat): 2959, 1724, 1516, 1285, 1248, 1171, 1038 cm<sup>-1</sup>.

**HRMS** (ESI+): *m/z* calc'd for (M + H)<sup>+</sup> [C<sub>16</sub>H<sub>22</sub>O<sub>3</sub> + H]<sup>+</sup>: 263.1642, found 263.1638.

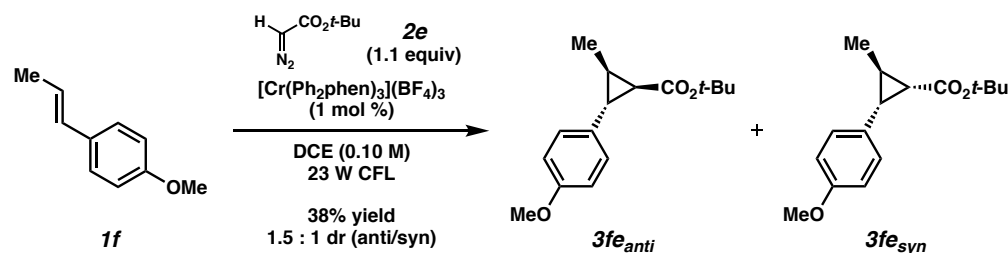

**Cyclopropane 3fe**. Prepared according to the *General Procedure* using 14.8 mg *trans*-anethole (0.0999 mmol), 15.6 mg diazoacetate **2e** (0.110 mmol) 1.3 mg **[Cr(Ph<sub>2</sub>phen)<sub>3</sub>](BF<sub>4</sub>)<sub>3</sub>** (0.999 μmol), and 1.0 mL DCE. The reaction mixture was irradiated for 69 h. Diastereomeric ratio (1.5:1 anti/syn) was determined by <sup>1</sup>H NMR analysis of the crude mixture. The crude product was purified by flash chromatography (100% hexanes → 9:1 hexanes/EtOAc eluent) to afford cyclopropane **3fe** (10.0 mg, 38% yield) as a colorless oil.

**TLC**: R<sub>f</sub> = 0.52 in 9:1 hexanes/EtOAc, visualized by UV.

**<sup>1</sup>H NMR** (400 MHz; CDCl<sub>3</sub>): Major (anti): δ 7.00 (d, *J* = 8.6 Hz, 2H), 6.81 (d, *J* = 8.6 Hz, 2H), 3.78 (s, 3H), 2.29 (dd, *J* = 6.0, 5.3 Hz, 1H), 1.87 (dd, *J* = 9.4, 5.3 Hz, 1H), 1.56-1.50 (comp. m, 1H), 1.47 (s, 9H), 1.31 (d, *J* = 6.4 Hz, 3H).

Minor (syn): δ 7.15 (d, *J* = 8.2 Hz, 2H), 6.79 (d, *J* = 8.2 Hz, 2H), 3.77 (s, 3H), 2.24 (dd, *J* = 9.2, 6.8 Hz, 1H), 1.94 (app. sextet, *J* = 6.0 Hz, 1H), 1.68 (dd, *J* = 9.2, 5.0 Hz, 1H), 1.23 (d, *J* = 6.0 Hz, 3H), 1.18 (s, 9H).

**<sup>13</sup>C NMR** (100 MHz; CDCl<sub>3</sub>): δ 171.1, 158.3, 158.2, 133.1, 130.4, 129.3, 127.2, 114.0, 113.4, 80.6, 80.0, 55.5, 55.4, 33.3, 31.2, 31.1, 30.4, 28.4, 28.0, 25.2, 19.2, 17.8, 12.1.

**IR** (ATR, neat): 2976, 1717, 1516, 1366, 1248, 1152, 1038 cm<sup>-1</sup>.

**HRMS** (ESI+): *m/z* calc'd for (M + Na)<sup>+</sup> [C<sub>16</sub>H<sub>22</sub>O<sub>3</sub> + Na]<sup>+</sup>: 285.1461, found 285.1463.

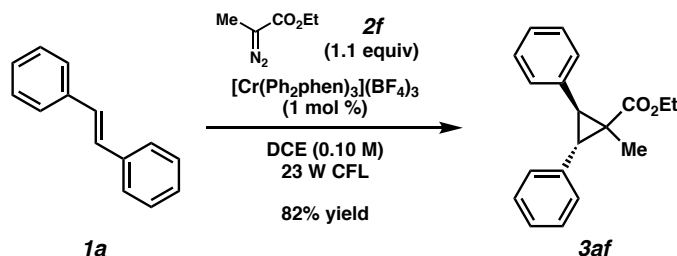

**Cyclopropane 3af**. Prepared with a slight modification to the *General Procedure* using 17.9 mg *trans*-stilbene (0.0993 mmol), 14.0 mg diazoacetate **2f** (0.109 mmol), 1.3 mg **[Cr(Ph<sub>2</sub>phen)<sub>3</sub>](BF<sub>4</sub>)<sub>3</sub>** (0.993 μmol), and 1.0 mL DCE. The reaction mixture was irradiated for 48 h. The crude product was purified by flash chromatography (100% hexanes → 19:1 hexanes/EtOAc as eluent) to afford cyclopropane **3af** (22.8 mg, 82% yield) as a colorless oil.

**TLC**: R<sub>f</sub> = 0.37 in 19:1 hexanes/EtOAc, visualized by UV.

**<sup>1</sup>H NMR** (400 MHz; CDCl<sub>3</sub>): δ 7.36-7.22 (m, 10H), 3.87-3.84 (m, 2H), 3.60 (d, *J* = 7.4 Hz, 1H), 2.78 (d, *J* = 7.4 Hz, 1H), 1.21 (s, 3H), 0.88 (t, *J* = 7.2 Hz, 3H).

**<sup>13</sup>C NMR** (100 MHz; CDCl<sub>3</sub>): δ 172.3, 137.3, 137.2, 129.4, 129.2, 128.5, 128.1, 127.0, 126.8, 60.6, 37.7, 33.9, 33.7, 16.5, 14.0.

**IR** (ATR, neat): 2981, 1717, 1498, 1447, 1260, 1243, 1145, 1029, 749, 697 cm<sup>-1</sup>.

**HRMS** (ESI+): *m/z* calc'd for (M+H)<sup>+</sup> [C<sub>19</sub>H<sub>20</sub>O<sub>2</sub> + H]<sup>+</sup>: 281.1536, found 281.1522.

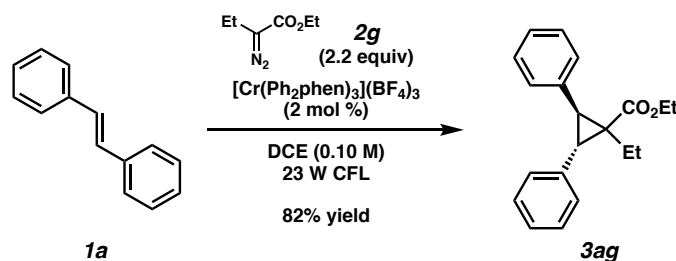

**Cyclopropane 3ag.** Prepared with a modification to the *General Procedure* using 17.8 mg *trans*-stilbene (0.0988 mmol), 15.5 mg diazoacetate **2g** (0.109 mmol), 1.3 mg [Cr(Ph<sub>2</sub>phen)<sub>3</sub>](BF<sub>4</sub>)<sub>3</sub> (0.988 μmol), and 1.0 mL DCE. The reaction mixture was irradiated for 48 h, at which point an additional 1.3 mg (0.988 μmol) of catalyst and 15.5 mg (0.109 mmol) of diazoacetate were added, and the reaction mixture was irradiated for another 24 h. The crude product was purified by flash chromatography (100% hexanes → 9:1 hexanes/Et<sub>2</sub>O eluent) to afford cyclopropane **3ag** (23.8 mg, 82% yield) as a colorless oil.

**TLC:** R<sub>f</sub> = 0.52 in 9:1 hexanes/Et<sub>2</sub>O, visualized by UV.

**<sup>1</sup>H NMR** (400 MHz; CDCl<sub>3</sub>): δ 7.34-7.21 (m, 10H), 3.91-3.83 (m, 2H), 3.64 (d, *J* = 7.6 Hz, 1H), 2.84 (d, *J* = 7.6 Hz, 1H), 1.66 (dq, *J* = 14.4, 7.3 Hz, 1H), 1.43 (dq, *J* = 14.4, 7.1 Hz, 1H), 0.94-0.88 (m, 6H).

**<sup>13</sup>C NMR** (100 MHz; CDCl<sub>3</sub>): δ 171.6, 137.3, 137.0, 129.4, 129.1, 128.4, 128.1, 126.9, 126.7, 60.4, 40.3, 35.6, 34.4, 23.5, 14.0, 12.0.

**IR** (ATR, neat): 2976, 1721, 1497, 1246, 1148, 745, 696 cm<sup>-1</sup>.

**HRMS** (ESI<sup>+</sup>): *m/z* calc'd for (M + H)<sup>+</sup> [C<sub>20</sub>H<sub>22</sub>O<sub>2</sub> + H]<sup>+</sup>: 295.1693, found 295.1694.

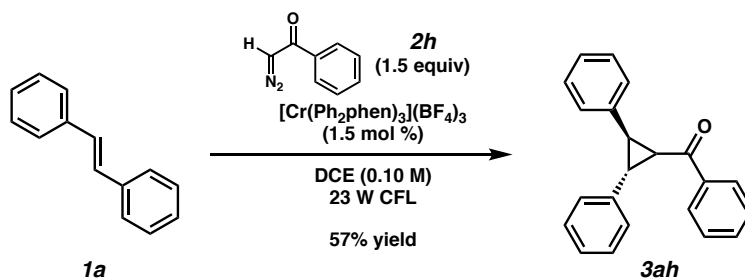

**Cyclopropane 3ah.** Prepared according to the *General Procedure* using 18.0 mg *trans*-stilbene (0.0999 mmol), 16.0 mg diazoketone **2h** (0.150 mmol), 2.0 mg [Cr(Ph<sub>2</sub>phen)<sub>3</sub>](BF<sub>4</sub>)<sub>3</sub> (1.50 μmol), and 1.0 mL DCE. The reaction mixture was irradiated for 48 h. The crude product was purified by flash chromatography (100% hexanes → 9:1 hexanes/Et<sub>2</sub>O eluent) to afford *trans*-cyclopropane **3ah** (16.9 mg, 57% yield) as a white solid.

**TLC:** R<sub>f</sub> = 0.36 in 9:1 hexanes/Et<sub>2</sub>O, visualized by UV.

All spectroscopic data were in accordance with the published values.<sup>5</sup>

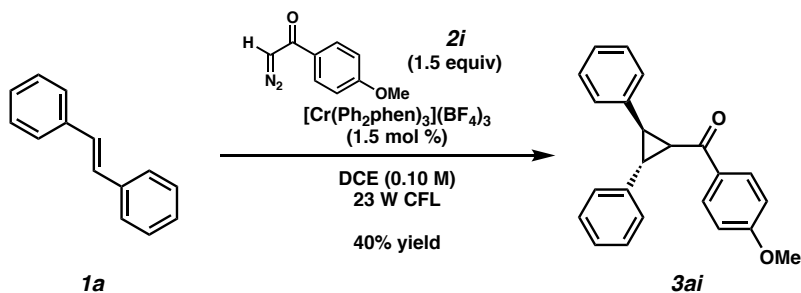

**Cyclopropane 3ai.** Prepared according to the *General Procedure* using 18.0 mg *trans*-stilbene (0.0999 mmol), 26.4 mg diazoketone **2i** (0.150 mmol), 1.3 mg  $[\text{Cr}(\text{Ph}_2\text{phen})_3](\text{BF}_4)_3$  (0.999  $\mu\text{mol}$ ), and 1.0 mL DCE. The reaction mixture was irradiated for 48 h. The crude product was purified by flash chromatography (100% hexanes  $\rightarrow$  4:1 hexanes/ $\text{Et}_2\text{O}$  eluent) to afford *trans*-cyclopropane **3ai** (13.2 mg, 40% yield) as a white solid.

**TLC:**  $R_f = 0.26$  in 4:1 hexanes/ $\text{Et}_2\text{O}$ , visualized by UV.

All spectroscopic data were in accordance with the published values.<sup>5</sup>

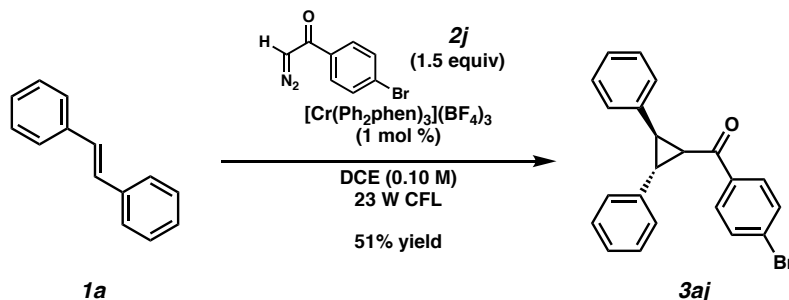

**Cyclopropane 3aj.** Prepared according to the *General Procedure* using 18.0 mg *trans*-stilbene (0.0999 mmol), 33.8 mg diazoketone **2j** (0.150 mmol), 1.3 mg  $[\text{Cr}(\text{Ph}_2\text{phen})_3](\text{BF}_4)_3$  (0.999  $\mu\text{mol}$ ), and 1.0 mL DCE. The reaction mixture was irradiated for 48 h. The crude product was purified by flash chromatography (100% hexanes  $\rightarrow$  9:1 hexanes/ $\text{Et}_2\text{O}$  eluent) to afford *trans*-cyclopropane **3aj** (19.1 mg, 51% yield) as a pale yellow solid.

**TLC:**  $R_f = 0.41$  in 9:1 hexanes/ $\text{Et}_2\text{O}$ , visualized by UV.

All spectroscopic data were in accordance with the published values.<sup>5</sup>

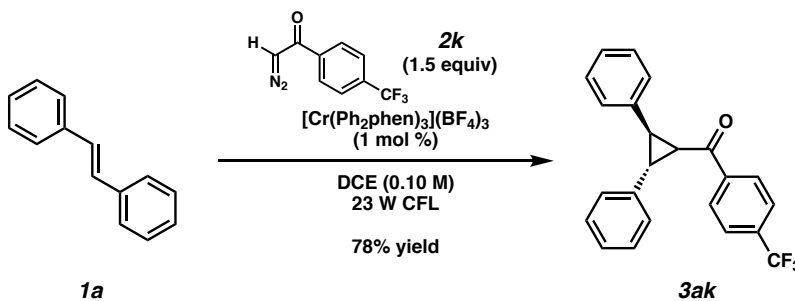

**Cyclopropane 3ak.** Prepared according to the *General Procedure* using 18.1 mg *trans*-stilbene (0.100 mmol), 32.0 mg diazoketone **2k** (0.110 mmol), 1.3 mg  $[\text{Cr}(\text{Ph}_2\text{phen})_3](\text{BF}_4)_3$  (1.00  $\mu\text{mol}$ ), and 1.0 mL DCE. The reaction mixture was irradiated for 13 h. The crude product was purified by flash chromatography (100% hexanes  $\rightarrow$  19:1 hexanes/ $\text{EtOAc}$  eluent) to afford *trans*-cyclopropane **3ak** (28.6 mg, 78% yield) as a colorless oil that solidified upon standing.

**TLC:**  $R_f = 0.35$  in 19:1 hexanes/ $\text{EtOAc}$ , visualized by UV.

**$^1\text{H NMR}$**  (400 MHz;  $\text{CDCl}_3$ ):  $\delta$  8.04 (d,  $J = 8.3$  Hz, 2H), 7.70 (d,  $J = 8.3$  Hz, 2H), 7.38-7.19 (comp. m, 10H), 3.66 (app. t,  $J = 6.2$  Hz, 1H), 3.35 (app. d,  $J = 6.0$  Hz, 2H).

**$^{13}\text{C NMR}$**  (125 MHz;  $\text{CDCl}_3$ ):  $\delta$  194.3, 141.1, 139.6, 135.2, 129.2, 128.8, 128.5, 128.4, 127.3, 127.1, 127.0, 126.6, 125.8 (q,  $J_{\text{C-F}} = 15$  Hz), 125.7, 38.4, 36.9, 30.4.

**IR** (ATR, neat): 3054, 1577, 1324, 1170, 1128, 1067, 1016, 756, 696  $\text{cm}^{-1}$ .

**HRMS** (ESI+):  $m/z$  calc'd for  $(\text{M}+\text{H})^+$   $[\text{C}_{23}\text{H}_{17}\text{F}_3\text{O} + \text{H}]^+$ : 367.1304, found 367.1306.

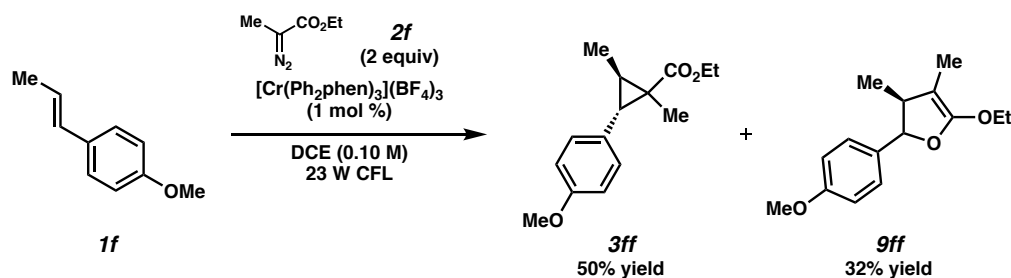

**Cyclopropane 3ff.** Prepared according to the *General Procedure* using 14.7 mg *trans*-anethole (0.0992 mmol), 14.0 mg diazoacetate **2f** (0.109 mmol), 1.3 mg  $[\text{Cr}(\text{Ph}_2\text{phen})_3](\text{BF}_4)_3$  (0.992  $\mu\text{mol}$ ), and 1.0 mL DCE. The reaction mixture was irradiated for 48 h. Diastereomeric ratio (**3ff**: 1.1:1 anti/syn; **9ff**: 1.5:1 major/minor) was determined by  $^1\text{H}$  NMR analysis of the crude mixture. The crude products were purified by flash chromatography (100% hexanes  $\rightarrow$  9:1 hexanes/Et<sub>2</sub>O  $\rightarrow$  9:1 hexanes/EtOAc eluent) to afford 12.3 mg of cyclopropane **3ff** (50% yield) and 7.8 mg of dihydrofuran **9ff** (32% yield).

**TLC:**  $R_f$  = 0.43 in 9:1 hexanes/EtOAc, visualized by UV and stained purple with *p*-anisaldehyde.

**$^1\text{H}$  NMR** (400 MHz;  $\text{CDCl}_3$ ): Major (anti):  $\delta$  7.09 (d,  $J$  = 8.6 Hz, 2H), 6.82 (d,  $J$  = 8.6 Hz, 2H), 4.19 (q,  $J$  = 7.2 Hz, 2H), 3.79 (s, 3H), 2.72 (d,  $J$  = 7.2 Hz, 1H), 2.21 (app. q,  $J$  = 6.4 Hz, 1H), 1.31 (d,  $J$  = 6.4 Hz, 3H), 1.29 (t,  $J$  = 7.2 Hz, 3H), 0.97 (s, 3H).

Minor (syn):  $\delta$  7.11 (d,  $J$  = 8.6 Hz, 2H), 6.77 (d,  $J$  = 8.6 Hz, 2H), 3.81-3.77 (comp m., 2H), 3.77 (s, 3H), 1.92 (d,  $J$  = 7.2 Hz, 1H), 1.46-1.40 (m, 1H), 1.43 (s, 3H), 1.26 (d,  $J$  = 6.4 Hz, 3H), 0.89 (t,  $J$  = 7.0 Hz, 3H).

**$^{13}\text{C}$  NMR** (100 MHz;  $\text{CDCl}_3$ ):  $\delta$  174.0, 173.1, 158.3, 158.2, 130.2, 130.0, 129.8, 113.6, 113.3, 60.6, 60.2, 55.4, 40.7, 36.4, 31.7, 30.6, 28.3, 23.3, 16.2, 15.3, 14.5, 14.1, 13.4, 12.7.

**IR** (ATR, neat): 2975, 1719, 1515, 1474, 1247, 1174, 1158, 1033  $\text{cm}^{-1}$ .

**HRMS** (ESI+):  $m/z$  calc'd for  $(\text{M}+\text{Na})^+$   $[\text{C}_{15}\text{H}_{20}\text{O}_3 + \text{Na}]^+$ : 271.1305, found 271.1305.

#### Dihydrofuran 9ff.

**TLC:**  $R_f$  = 0.31 in 17:3 hexanes/EtOAc, visualized by UV and stained gray with *p*-anisaldehyde.

**$^1\text{H}$  NMR** (400 MHz;  $\text{CDCl}_3$ ): Major:  $\delta$  7.31 (d,  $J$  = 8.6 Hz, 2H), 6.90 (d,  $J$  = 8.6 Hz, 2H), 4.89 (d,  $J$  = 9.6 Hz, 1H), 4.35-4.25 (comp. m, 2H), 3.81 (s, 3H), 2.69 (dq,  $J$  = 9.6, 7.0 Hz, 1H), 1.65 (s, 3H), 1.36 (t,  $J$  = 7.2 Hz, 3H), 1.03 (d,  $J$  = 7.0 Hz, 3H).

Minor:  $\delta$  7.29 (d,  $J$  = 8.6 Hz, 2H), 6.89 (d,  $J$  = 8.6 Hz, 2H), 4.68 (d,  $J$  = 8.4 Hz, 1H), 4.35-4.25 (comp. m, 2H), 3.80 (s, 3H), 3.25 (qd,  $J$  = 8.4 Hz, 7.2 Hz, 1H), 1.46 (s, 3H), 1.34 (t,  $J$  = 6.4 Hz, 3H), 1.12 (d,  $J$  = 7.2 Hz, 3H).

**$^{13}\text{C}$  NMR** (125 MHz;  $\text{CDCl}_3$ ):  $\delta$  173.8, 171.3, 160.4, 160.3, 129.2, 128.8, 127.0, 126.7, 114.4, 114.3, 90.9, 88.6, 88.4, 87.9, 61.9, 61.7, 61.1, 55.4, 54.6, 21.8, 17.4, 14.5, 14.4, 12.5, 11.5.

**IR** (ATR, neat): 2981, 1733, 1612, 1516, 1462, 1251, 1177, 1109, 1030, 829  $\text{cm}^{-1}$ .

**HRMS** (ESI+):  $m/z$  calc'd for  $(\text{M}+\text{H})^+$   $[\text{C}_{15}\text{H}_{20}\text{O}_3 + \text{H}]^+$ : 249.1485, found 249.1485.

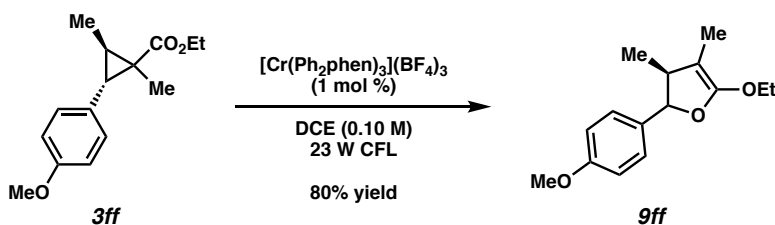

**Cyclopropane to Dihydrofuran Rearrangement.** A solution of cyclopropane **3ff** (7.7 mg (0.0310 mmol)) and  $[\text{Cr}(\text{Ph}_2\text{phen})_3](\text{BF}_4)_3$  (0.4 mg) in DCE (0.5 mL) was prepared in a flame-dried borosilicate vial open to air. The vial was then capped and placed in a closed box, lined with aluminum foil, and equipped with a 23 W compact fluorescent light bulb. The reaction mixture was irradiated for 45 h. The reaction mixture was concentrated via rotary evaporation and purified by flash column chromatography (100% hexanes  $\rightarrow$  17:3 hexanes/EtOAc eluent) to afford 6.1 mg of dihydrofuran **9ff** (80% yield).



## Diastereomer Assignments

For the cyclopropane products where diastereomers were formed, their stereochemistry was assigned by analysis of NMR data. Specifically, coupling constants for two of the cyclopropyl protons could be identified and evaluated, and their relative values gave a strong indication of relative positioning. An anti relationship of the two protons would have a smaller coupling constant than the corresponding syn relationship. An example using compound **3fa** is depicted below.

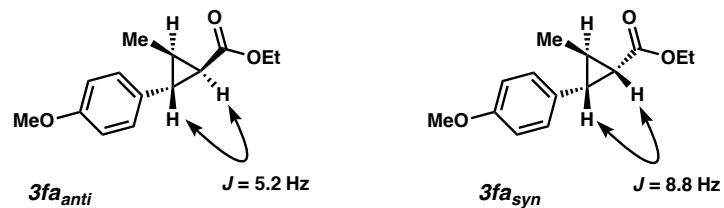

## Optimization Studies

Table 1 (Reproduced). Optimization of Cr-catalyzed cyclopropanation.

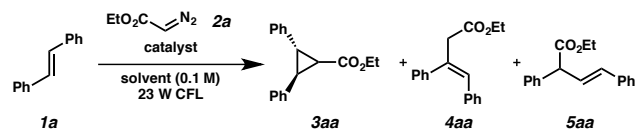

| entry           | catalyst (mol %)                  | solvent                         | equiv 2a | time (h) | NMR yield <sup>a</sup> |     |     |
|-----------------|-----------------------------------|---------------------------------|----------|----------|------------------------|-----|-----|
|                 |                                   |                                 |          |          | 3aa                    | 4aa | 5aa |
| 1 <sup>b</sup>  | Cr1 (1)                           | CH <sub>3</sub> NO <sub>2</sub> | 5        | 24       | 60                     | 8   | 7   |
| 2               | Cr1 (1)                           | CH <sub>3</sub> NO <sub>2</sub> | 5        | 24       | 61                     | 10  | 8   |
| 3               | Cr1 (1)                           | CH <sub>3</sub> NO <sub>2</sub> | 1.1      | 40       | 60                     | 8   | 11  |
| 4               | Cr2 (1)                           | CH <sub>3</sub> NO <sub>2</sub> | 1.1      | 40       | 5                      | 1   | 1   |
| 5               | Cr3 (1)                           | CH <sub>3</sub> NO <sub>2</sub> | 1.1      | 40       | 40                     | 8   | 7   |
| 6               | Cr4 (1)                           | CH <sub>3</sub> NO <sub>2</sub> | 1.1      | 40       | 50                     | 9   | 8   |
| 7               | Ru1 (1)                           | CH <sub>3</sub> NO <sub>2</sub> | 1.1      | 24       | 3                      | 0   | 0   |
| 8               | Ru1 (1)                           | CH <sub>3</sub> NO <sub>2</sub> | 5        | 14       | 9                      | 4   | 5   |
| 9               | Ru2 (5)<br>+ MV (15) <sup>c</sup> | CH <sub>3</sub> NO <sub>2</sub> | 5        | 21       | 12                     | 2   | 2   |
| 10              | Ru2 (5)                           | CH <sub>3</sub> NO <sub>2</sub> | 5        | 21       | 0                      | 0   | 0   |
| 11              | Cr1 (1)                           | CHCl <sub>3</sub>               | 1.1      | 24       | 18                     | 1   | 2   |
| 12              | Cr1 (1)                           | acetone                         | 1.1      | 24       | 57                     | 5   | 8   |
| 13              | Cr1 (1)                           | CH <sub>2</sub> Cl <sub>2</sub> | 1.1      | 24       | 73                     | 2   | 7   |
| 14              | Cr1 (1)                           | CH <sub>3</sub> CN              | 1.1      | 24       | 67                     | 8   | 10  |
| 15              | Cr1 (1)                           | DCE                             | 1.1      | 24       | 73                     | 0   | 5   |
| 16              | none                              | DCE                             | 1.1      | 14       | 0                      | 0   | 0   |
| 17              | CrCl <sub>3</sub> (10)            | DCE                             | 1.1      | 49       | 0                      | 0   | 0   |
| 18 <sup>d</sup> | Cr1 (1)                           | DCE                             | 1.1      | 49       | 0                      | 0   | 0   |

<sup>a</sup> Determined using veratraldehyde as a standard. <sup>c</sup> Near UV light (bulbs at 300, 350, and 419 nm) used instead of 23 W CFL. <sup>e</sup> MV: methyl viologen<sup>2+</sup>(PF<sub>6</sub>)<sub>2</sub>. <sup>d</sup> Reaction performed in dark (foil wrapped).

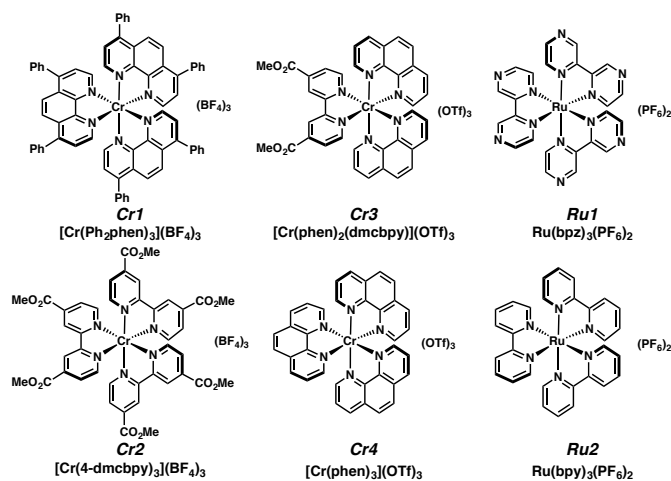

**General Procedure for Optimization Experiments:** A flame-dried 1-dram borosilicate vial open to air was charged with *trans*-stilbene (18.0 mg, 0.0999 mmol), ethyl diazoacetate (1.1 or 5.0 equiv), catalyst, and 1.0 mL solvent (0.1 M). The vial was then capped. The solution was irradiated with the indicated light source, stirring for the indicated time and then concentrated via rotary evaporation. The resulting crude product was analyzed by <sup>1</sup>H NMR, using veratraldehyde as a standard. Compounds 4aa and 5aa were identified by comparison to compounds reported in the literature.<sup>6</sup>

## Chemoselectivity Experiments

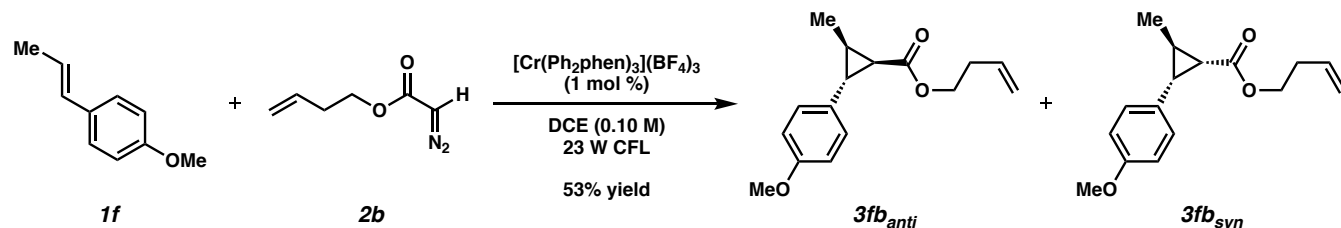

**Cyclopropane 3fb.** Prepared according to the *General Procedure* using 14.8 mg *trans*-anethole (0.0999 mmol), 15.4 mg diazoacetate **2b** (0.110 mmol), 1.3 mg  $[\text{Cr}(\text{Ph}_2\text{phen})_3](\text{BF}_4)_3$  (0.999  $\mu\text{mol}$ ), and 1.0 mL DCE. The reaction mixture was irradiated for 72 h. Diastereomeric ratio (1.1:1 anti/syn) was determined by  $^1\text{H}$  NMR analysis of the crude mixture. The crude product was purified by flash chromatography (100% hexanes  $\rightarrow$  9:1 hexanes/EtOAc eluent) to afford *trans*-cyclopropane **3fb** (13.9 mg, 53% yield) as a colorless oil.

**TLC:**  $R_f = 0.29$  in 9:1 hexanes/Et<sub>2</sub>O, visualized by UV. Stained blue by *p*-anisaldehyde.

**$^1\text{H}$  NMR** (400 MHz; CDCl<sub>3</sub>): Major (anti):  $\delta$  7.01 (d,  $J = 8.6$  Hz, 2H), 6.82 (d,  $J = 8.6$  Hz, 2H), 5.81 (ddt,  $J = 17.0, 10.3, 6.8$  Hz, 1H), 5.15-4.98 (comp. m, 2H), 4.17 (dt,  $J = 6.8, 1.5$  Hz, 2H), 3.78 (s, 3H), 2.41 (app. q,  $J = 6.8$  Hz, 2H), 2.36 (dd,  $J = 6.6, 5.0$  Hz, 1H), 1.93 (dd,  $J = 9.2, 5.0$  Hz, 1H), 1.67-1.58 (comp. m, 1H), 1.33 (d,  $J = 6.4$  Hz, 3H).

Minor (syn):  $\delta$  7.15 (d,  $J = 8.4$  Hz, 2H), 6.79 (d,  $J = 8.4$  Hz, 2H), 5.63 (ddt,  $J = 17.0, 10.5, 6.6$  Hz, 1H), 5.15-4.98 (comp. m, 2H), 3.95-3.84 (comp. m, 2H), 3.77 (s, 3H), 2.30 (dd,  $J = 9.2, 7.0$  Hz, 1H), 2.15 (app. qd,  $J = 6.8, 1.2$  Hz, 2H), 2.01 (app. sextet,  $J = 6.0$  Hz, 1H), 1.78 (dd,  $J = 9.2, 5.2$  Hz, 1H), 1.26 (d,  $J = 6.0$  Hz, 3H).

**$^{13}\text{C}$  NMR** (100 MHz; CDCl<sub>3</sub>):  $\delta$  171.9, 171.1, 158.4, 158.3, 134.31, 134.27, 132.7, 130.2, 128.8, 127.3, 117.3, 117.0, 114.0, 113.5, 63.7, 63.4, 55.5, 55.3, 33.9, 33.4, 33.1, 32.0, 30.0, 29.2, 25.4, 20.1, 17.9, 12.2.

**IR** (ATR, neat): 2960, 1724, 1517, 1248, 1168, 1037, 917, 829  $\text{cm}^{-1}$ .

**HRMS** (ESI+):  $m/z$  calc'd for  $(\text{M} + \text{H})^+$  [ $\text{C}_{16}\text{H}_{20}\text{O}_3 + \text{H}$ ]<sup>+</sup>: 261.1485, found 261.1472.

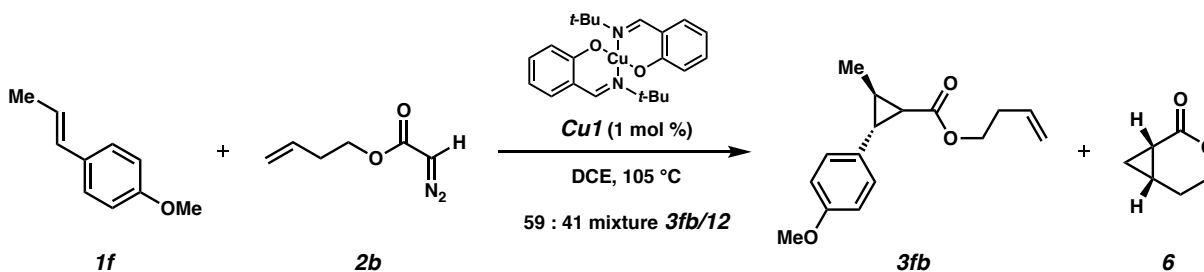

**Cu-Catalyzed Experiment.** To a flame-dried round bottom flask was added *trans*-anethole (**1f**, 0.150 mL, 1.01 mmol), copper catalyst **Cu1**<sup>7</sup> (4.2 mg, 0.0101 mmol), and 3.0 mL of DCE. The flask was fitted with a reflux condenser and placed in an oil bath that was subsequently heated to 105 °C. To this reaction mixture, a solution of diazo **2b** (1.10 mL, 1.0 M solution in CH<sub>2</sub>Cl<sub>2</sub>, 1.10 mmol) in 2.0 mL of DCE, was added *via* syringe pump at a rate of 500  $\mu\text{L}/\text{h}$ . After  $\sim 6$  h, the reaction mixture was allowed to cool to room temperature. The reaction mixture was concentrated via rotary evaporation and the crude reaction mixture was analyzed by  $^1\text{H}$  NMR. Through  $^1\text{H}$  NMR analysis, it was determined that a 59:41 ratio was obtained of **3fb**:**12**, with <20% consumption of either **1f** or **2b**. The presence of compound **12** was confirmed by comparison to literature data.<sup>8</sup> Unreacted *trans*-anethole was observed, as were diazo dimerization products (assigned by comparison to dimethyl fumarate and maleate).

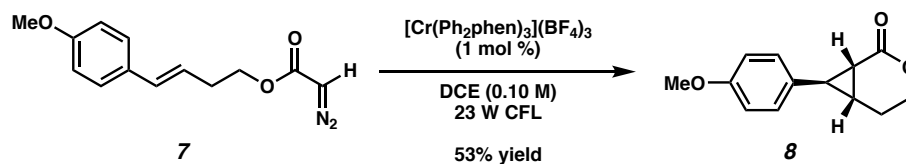

**Cyclopropane 8.** Prepared using 25.7 mg diazo ester **7** (0.104 mmol), 1.3 mg  $[\text{Cr}(\text{Ph}_2\text{phen})_3](\text{BF}_4)_3$  (1.04  $\mu\text{mol}$ ), and 1.0 mL DCE. The reaction mixture was irradiated for 48 h. The crude product was purified by flash chromatography (3:1  $\rightarrow$  1:1 hexanes/EtOAc eluent) to afford cyclopropane **8** (12.1 mg, 53% yield) as a colorless oil. The stereochemical assignment of cyclopropane **8** was determined by analogy to a similar lactone compound.<sup>8</sup>

**TLC:**  $R_f$  = 0.40 in 1:1 hexanes/EtOAc, visualized by UV and stained blue with *p*-anisaldehyde.

**<sup>1</sup>H NMR** (400 MHz;  $\text{CDCl}_3$ ):  $\delta$  7.04 (d,  $J$  = 8.6 Hz, 2H), 6.84 (d,  $J$  = 8.6 Hz, 2H), 4.34 (dd,  $J$  = 12.3, 6.2 Hz, 1H), 4.25 (app. td,  $J$  = 12.3, 4.1 Hz, 1H), 3.79 (s, 3H), 2.90 (app. t,  $J$  = 4.1 Hz, 1H), 2.25 (app. td,  $J$  = 13.0, 6.2 Hz, 1H), 2.14-2.10 (comp. m, 3H).

**<sup>13</sup>C NMR** (100 MHz;  $\text{CDCl}_3$ ):  $\delta$  169.9, 158.8, 130.1, 127.6, 114.3, 64.7, 55.5, 26.5, 24.6, 23.5, 20.6.

**IR** (ATR, neat): 2934, 1721, 1516, 1248, 1082, 1034, 806  $\text{cm}^{-1}$ .

**HRMS** (ESI+):  $m/z$  calc'd for  $(\text{M} + \text{H})^+$   $[\text{C}_{13}\text{H}_{14}\text{O}_3 + \text{H}]^+$ : 219.1016, found 219.1016.

## Nucleophile Competition Experiment

A solution containing 14.8 mg *trans*-anethole (0.0999 mmol, 1 equiv), 37.3  $\mu$ L ethyl diazoacetate (85% wt. solution in  $\text{CH}_2\text{Cl}_2$ , 0.300 mmol, 3 equiv), 30.0  $\mu$ L isoprene (0.300 mmol, 3 equiv), and 1.3 mg  $[\text{Cr}(\text{Ph}_2\text{phen})_3](\text{BF}_4)_3$  (0.999  $\mu$ mol, 1 mol %) in 1.0 mL DCE was prepared in a flame-dried borosilicate vial open to air. The vial was then capped and placed in a closed box, lined with aluminum foil, and equipped with a 23 W compact fluorescent light bulb. The mixture was irradiated for 48 h at which point it was concentrated *via* rotary evaporation. The crude product was analyzed by  $^1\text{H}$  NMR to determine the ratio of product distribution.

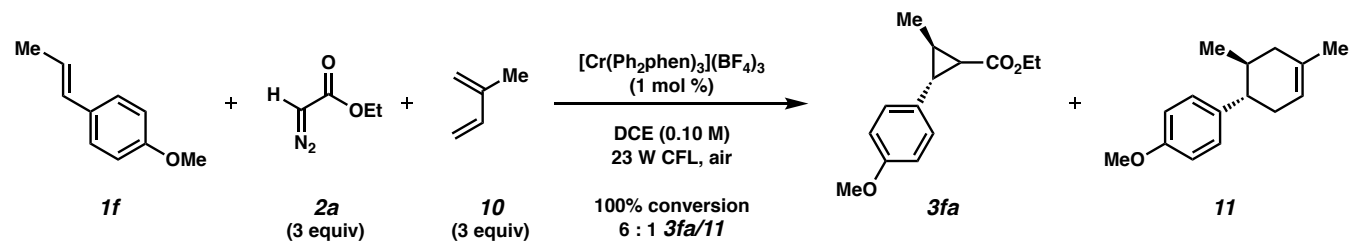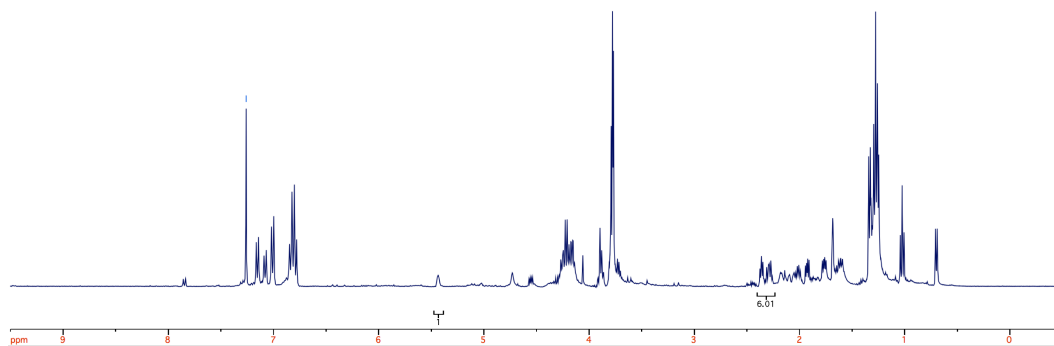

## Oxygen-Free Experiments

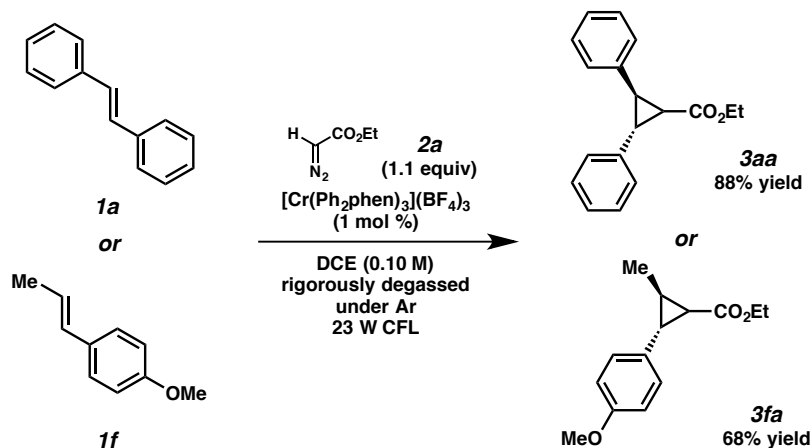

**Cyclopropane 3aa.** A solution containing 18.0 mg *trans*-stilbene (0.0999 mmol), 14.7 mg ethyl diazoacetate (0.110 mmol, 85% wt. solution in  $\text{CH}_2\text{Cl}_2$ , 1.1 equiv), and 1.3 mg  $[\text{Cr}(\text{Ph}_2\text{phen})_3](\text{BF}_4)_3$  (0.999  $\mu\text{mol}$ , 1 mol %) in 1.0 mL of deoxygenated DCE was prepared in a flame-dried schlenk flask under argon. The reaction mixture was degassed by freeze-pump-thaw method (3x) and kept under argon. The flask was placed above a stir plate, surrounded with aluminum foil, and irradiated with a 23 W compact fluorescent light bulb. The mixture was irradiated for 60 h at which point it was concentrated *via* rotary evaporation. The crude product was purified by flash column chromatography (100% hexanes  $\rightarrow$  19:1 hexanes/acetone eluent) to afford cyclopropane **3aa** (23.5 mg, 88% yield) as a colorless oil.

**Cyclopropane 3fa.** A solution containing 14.7 mg *trans*-anethole (0.0992 mmol), 14.6 mg ethyl diazoacetate (0.110 mmol, 85% wt. solution in  $\text{CH}_2\text{Cl}_2$ , 1.1 equiv), and 1.3 mg  $[\text{Cr}(\text{Ph}_2\text{phen})_3](\text{BF}_4)_3$  (0.992  $\mu\text{mol}$ , 1 mol %) in 1.00 mL of deoxygenated DCE was prepared in a flame-dried schlenk flask under argon. The reaction mixture was degassed by freeze-pump-thaw method (3x) and kept under argon. The flask was placed above a stir plate, surrounded with aluminum foil, and irradiated with a 23 W compact fluorescent light bulb. The mixture was irradiated for 60 h at which point it was concentrated *via* rotary evaporation. The crude product was purified by flash column chromatography (100% hexanes  $\rightarrow$  9:1 hexanes/EtOAc eluent) to afford cyclopropane **3fa** (15.8mg, 68% yield) as a colorless oil.

## Substrate Synthesis

**General Notes:** All reactions were performed in flame-dried glassware under argon. Aldehydes were used directly from commercial sources with no further purification. Alkyltriphenylphosphonium halides for Wittig reactions were dried under vacuum at 105 °C overnight prior to use. Alkenes were prepared from the reported procedures in the literature and the pure *E* isomer was subjected to the *General Procedure*. Where relevant, all spectroscopic data were consistent with the published values.

### Alkene Substrates

*General Procedure for alkene geometry enrichment:* When mixtures of *E* and *Z* isomers could be improved to greatly favor the *E* isomer, the protocol as previously described by Yoon<sup>9</sup> was followed. The mixture of isomers was dissolved in benzene (0.25 M), AIBN (0.15 equiv), and PhSH (0.5 equiv) were added, and the reaction was heated at reflux for 1 h. Upon cooling to room temperature, the mixture was washed sequentially with 1 M aq. NaOH and brine, dried over MgSO<sub>4</sub>, and concentrated using rotary evaporation. The residue was purified by flash column chromatography to afford the desired product as a single *E* isomer.

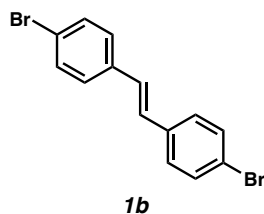

**Stilbene 1b.** Stilbene **1b** was synthesized according to the procedure described by Winter.<sup>10</sup>

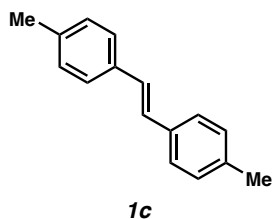

**Stilbene 1c.** Stilbene **1c** was synthesized according to the procedure described by Batey.<sup>11</sup>

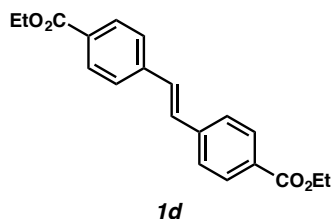

**Stilbene 1d.** Stilbene **1d** was synthesized in two steps from the corresponding dicarboxylic acid via reported procedures.<sup>12</sup>

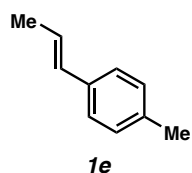

**Alkene 1e.** Alkene **1e** was prepared according to the procedure described by Nicewicz and coworkers.<sup>13</sup> To improve the isomeric ratio, the *E/Z* mixture was dissolved in benzene (0.25 M), AIBN (0.10 equiv) and PhSH (0.10 equiv) were added, and the reaction was heated at reflux overnight. The mixture was cooled to room temperature, diluted with Et<sub>2</sub>O, and washed sequentially with sat. aq. NaHCO<sub>3</sub>, then brine. The organic layer was dried over MgSO<sub>4</sub>, filtered, concentrated via rotary evaporation, and purified by flash column chromatography to afford alkene **1e** as a single *E* isomer.

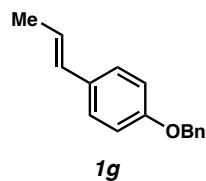

**Alkene 1g.** Alkene **1g** was prepared according to our reported procedure,<sup>14</sup> and the alkene geometry was enriched according to the above General Procedure.

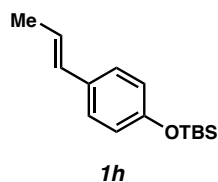

**Alkene 1h.** Alkene **1h** was prepared according to the procedure described by Yoon.<sup>15</sup>

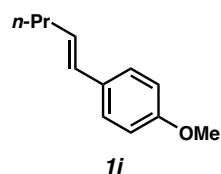

**Alkene 1i.** Alkene **1i** was prepared according to our reported procedure,<sup>14</sup> and the alkene geometry was enriched according to the above General Procedure.

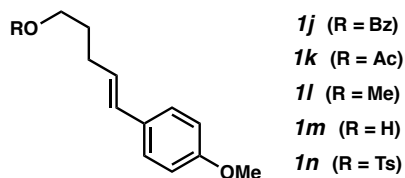

**Alkenes 1j-1n.** Alkenes **1j-1n** were prepared according to our reported procedures,<sup>14</sup> and the alkene geometry was enriched according to the above General Procedure.



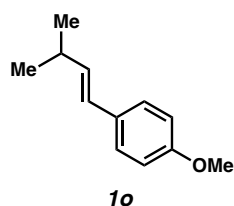

**Alkene 1o.** Alkene **1o** was prepared according to the procedure described by Yoon, and the alkene geometry was enriched according to the above General Procedure.<sup>9a</sup>

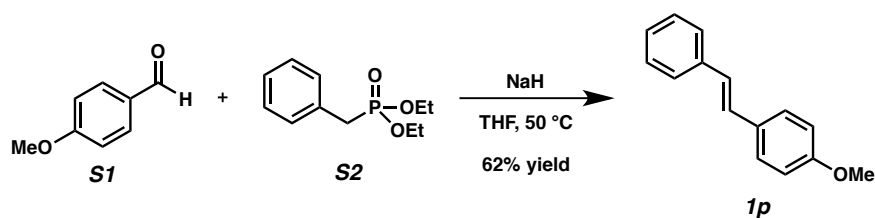

**Stilbene 1p.** Under an argon atmosphere, NaH (792 mg, 60% dispersion in mineral oil, 19.8 mmol, 3.0 equiv) was added to a solution of *p*-anisaldehyde (0.80 mL, 6.60 mmol, 1.0 equiv) and diethyl benzylphosphonate (1.40 mL, 6.60 mmol, 1.0 equiv) in THF (22.0 mL, 0.3 M) at room temperature. The resulting mixture was stirred at 50 °C for 30 min. The reaction mixture was cooled to room temperature and H<sub>2</sub>O (25 mL) was added, which caused a white solid to precipitate. The reaction mixture was filtered, and the white precipitate was washed with water. The crude product was recrystallized from hot EtOH, filtered, washed with cold EtOH, and dried in vacuo to yield alkene **1p** (857 mg, 62% yield) as fine white crystals. TLC:  $R_f = 0.63$  in 9:1 hexanes/EtOAc, visualized by UV.

All spectroscopic data were in accordance with the published values.<sup>16</sup>

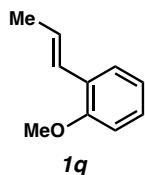

**Alkene 1q.** Alkene **1q** was prepared according to our reported procedure,<sup>14</sup> and the alkene geometry was enriched according to the above General Procedure.

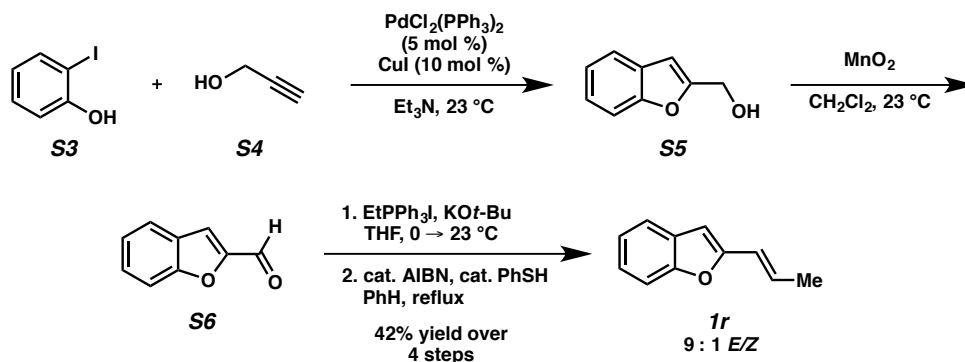

**Alkene 1r.** Alkene **1r** was synthesized in 4 steps from 2-iodophenol. A solution of 2-iodophenol (500 mg, 2.27 mmol) and propargyl alcohol (0.144 mL, 2.50 mmol) in triethylamine (5.0 mL, 0.454 M) at 23 °C was degassed with argon via bubbling for 15 min. CuI (43.0 mg, 0.227 mmol) was added followed by PdCl<sub>2</sub>(PPh<sub>3</sub>)<sub>2</sub> (80.0 mg, 0.114 mmol), and the mixture was

stirred at 23 °C overnight. Upon completion, the mixture was filtered through a SiO<sub>2</sub> plug, washing with EtOAc (25 mL). The filtrate was concentrated under reduced pressure and carried directly to the next transformation without further purification. The crude carbinol (**S5**) was dissolved in 13.6 mL CH<sub>2</sub>Cl<sub>2</sub> (0.484 M), and 1.90 g (10 equiv) of MnO<sub>2</sub> was added to the mixture. After stirring overnight, the mixture was filtered through a celite plug using CH<sub>2</sub>Cl<sub>2</sub> as the eluent (25 mL). The filtrate was concentrated under reduced pressure to give crude aldehyde **S6**, which was carried directly to the next transformation without further purification. In a dry round bottom flask, 1.11 g of EtPPh<sub>3</sub>I (2.66 mmol, 1.4 equiv) and KO<sup>t</sup>-Bu (2.47 mmol, 1.3 equiv) were added. The reaction flask was placed in an ice-water bath, and THF (5 mL, 0.4 M) was added to the mixture. The solution was stirred at 0 °C for 0.5 h, at which point a solution of aldehyde **S6** in 1.0 mL THF was added dropwise via syringe. The mixture was allowed to warm to room temperature and stirred overnight. Once complete, the mixture was quenched with sat. aq. NH<sub>4</sub>Cl (10 mL) and H<sub>2</sub>O (5 mL), and it was extracted with Et<sub>2</sub>O (3 x 25 mL). The combined organic layers were washed with brine (40 mL) and dried over MgSO<sub>4</sub>. The MgSO<sub>4</sub> was filtered, and the solvent was removed via rotary evaporation to give an amorphous residue that was purified by silica gel chromatography (100% hexanes → 19:1 hexanes/Et<sub>2</sub>O) to afford alkene **1r** (253 mg, 4:1 *E/Z* mixture, 70% yield over 3 steps) as a colorless oil. To further enrich the *E* geometry, 250 mg (1.58 mmol) of alkene **1r** was dissolved in 6.4 mL of benzene (0.25 M). To the solution was added 26.0 mg AIBN (0.158 mmol) and 0.02 mL PhSH (0.158 mmol), and the mixture was heated to reflux and stirred overnight. After cooling to room temperature, the mixture was diluted with Et<sub>2</sub>O (15 mL), transferred to a separatory funnel and washed with sat. aq. NaHCO<sub>3</sub> (10 mL). The organic layer was dried over MgSO<sub>4</sub>, filtered, and concentrated via rotary evaporation to afford a cloudy oil that was purified by flash column chromatography (100% hexanes → 19:1 hexanes/Et<sub>2</sub>O) to afford alkene **1r** (152 mg, 60% yield, ~9:1 *trans/cis*) as a colorless oil.

**TLC:** R<sub>f</sub> = 0.79 in 9:1 hexanes/Et<sub>2</sub>O, visualized by UV, stained yellow by KMnO<sub>4</sub>.

(Note: NMR spectroscopic data reported is for the *E* isomer only.)

**<sup>1</sup>H NMR** (400 MHz; CDCl<sub>3</sub>): δ 7.49 (d, *J* = 7.6 Hz, 1H), 7.41 (d, *J* = 7.6 Hz, 1H), 7.23-7.15 (m, 2H), 6.49 (dd, *J* = 15.6, 6.8 Hz, 1H), 6.45 (br s, 1H), 6.34 (dd, *J* = 15.6, 1.6 Hz, 1H), 1.94 (dd, *J* = 6.8, 1.2 Hz, 3H).

**<sup>13</sup>C NMR** (125 MHz; CDCl<sub>3</sub>): δ 155.3, 154.7, 129.2, 128.7, 124.0, 122.8, 120.7, 120.1, 110.9, 102.6, 18.7.

**IR** (ATR, neat): 2932, 1652, 1453, 1254, 959, 748 cm<sup>-1</sup>.

**HRMS** (ESI+): *m/z* calc'd for (M)<sup>+</sup> [C<sub>11</sub>H<sub>10</sub>O]<sup>+</sup>: 158.0726, found 158.0726.

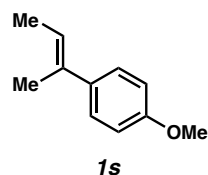

**Alkene 1s.** Alkene **1s** was prepared according to the procedure described by Castle.<sup>17</sup>

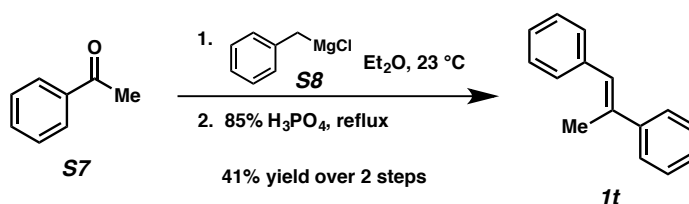

**Stilbene 1t.** A suspension of magnesium turnings (560 mg, 23.0 mmol, 2.3 equiv) in dry Et<sub>2</sub>O (11.1 mL) was prepared in a flame-dried round bottom flask fitted with a reflux condenser. A solution of benzyl chloride (2.30 mL, 20.0 mmol, 2.0 equiv) in dry Et<sub>2</sub>O (11.1 mL) was added dropwise at room temperature, and bubbling indicated the formation of benzyl magnesium chloride. Once bubbling ceased, the mixture was set to a gentle reflux at 35 °C for approximately 15 min, and then cooled to room temperature. To this freshly prepared Grignard solution was added acetophenone (1.17 mL, 10.0 mmol, 1.0 equiv) dropwise at ambient temperature. The reaction mixture was stirred at room temperature until determined complete by TLC (~1 h). The reaction mixture was quenched with sat. aq. NH<sub>4</sub>Cl (25 mL) and extracted with Et<sub>2</sub>O (3 x 25 mL). The combined organic phases were washed with brine (60 mL), dried over MgSO<sub>4</sub>, filtered, and concentrated by rotary evaporation. The crude product was then refluxed in 85% phosphoric acid (17.0 mL, 0.6 M) for 12 h. After cooling to room temperature, the reaction mixture was poured into H<sub>2</sub>O (25 mL) and extracted with Et<sub>2</sub>O (3 x 25 mL). The combined organic phases were then washed with H<sub>2</sub>O (60 mL), then brine (60 mL), dried over MgSO<sub>4</sub>, filtered, and concentrated by rotary

evaporation. The crude product was recrystallized from hot EtOH. The crystals were collected by filtration, washed with cold EtOH, and dried in vacuo to provide alkene **1t** (800 mg, 41% yield over two steps) as white crystals.

TLC:  $R_f = 0.77$  in 9:1 hexanes/Et<sub>2</sub>O, visualized by UV.

All spectroscopic data were consistent with previously reported values.<sup>18</sup>

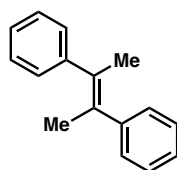

**1u**  
(~1:1 E/Z)

**Alkene 1u.** Alkene **1u** was prepared according to the procedure described by Konwar and Dutta.<sup>19</sup>

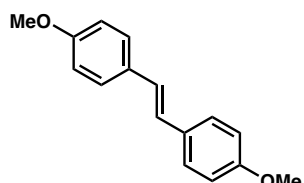

**1v**

**Stilbene 1v.** Stilbene **1v** was synthesized according to the procedure described by Kam.<sup>20</sup>

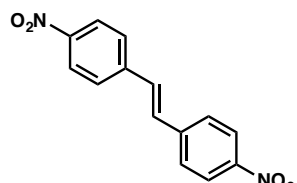

**1w**

**Stilbene 1w.** Stilbene **1w** was synthesized according to the procedure described by Bendig.<sup>21</sup>

## Diazo Substrates

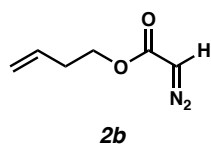

**Diazoester 2b.** Diazoester **2b** was synthesized according to the procedure described by Moody.<sup>22</sup>

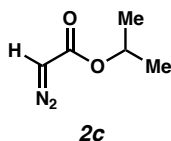

**Diazoacetate 2c.** Diazoacetate **2c** was synthesized according to the procedure described by Hodgson.<sup>23</sup>

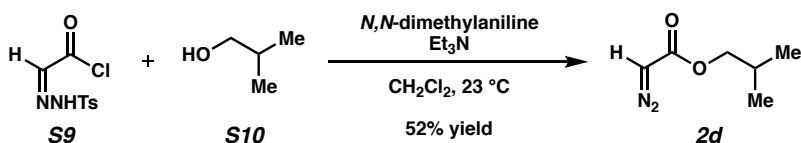

**Diazoacetate 2d.** To synthesize diazoacetate **2d**, a modified procedure by Corey and Myers<sup>24</sup> was followed. At room temperature, *N,N*-dimethylaniline (0.600 mL, 4.60 mmol, 1.2 equiv) was added dropwise to a solution of dry dichloromethane (6.30 mL) containing glyoxalyl chloride tosylhydrazone (1.00 g, 3.80 mmol) and 2-methyl-1-propanol (0.530 mL, 5.70 mmol, 1.5 equiv). The resulting mixture was stirred at room temperature for 1 h. Triethylamine (2.70 mL, 19.0 mmol, 5.0 equiv) was added, and the resulting mixture was stirred for 30 min, before being poured into water (10 mL). The resulting mixture was extracted with Et<sub>2</sub>O (3 x 10 mL). The combined organic extracts were washed once with brine (40 mL) and dried over MgSO<sub>4</sub>. The MgSO<sub>4</sub> was filtered, and the solvent removed via rotary evaporation to give a yellow oil, which was purified by silica gel flash chromatography (9:1 hexanes/Et<sub>2</sub>O eluent) to give diazoacetate **2d** (280 mg, 52% yield) as a yellow oil.

TLC:  $R_f = 0.52$  in 9:1 hexanes/EtOAc, visualized by UV.

All spectroscopic data were in accordance with the published values.<sup>25</sup>

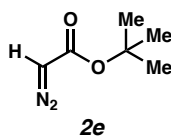

**Diazoacetate 2e.** Diazoacetate **2e** was synthesized according to the procedure described by Johnson.<sup>26</sup>

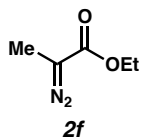

**Diazopropionate 2f.** Diazopropionate **2f** was synthesized according to the procedure described by Wang and Lin.<sup>27</sup>

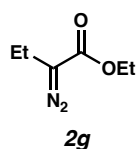

**Diazobutyrate 2g.** Diazobutyrate **2g** was synthesized according to the procedure described by Wulff.<sup>28</sup>

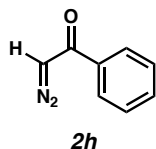

**Diazoketone 2h.** Diazoketone **2h** was synthesized according to the procedure described by Wu.<sup>29</sup>

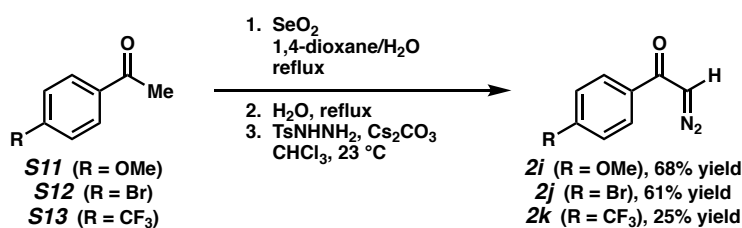

**Diazoketones 2i-2k.** Diazoketones **2i-2k** were synthesized from their respective, commercially available, para-substituted acetophenone precursors. Employing a reported  $\alpha$ -oxidation procedure,<sup>30</sup> to a round bottom flask containing 333 mg of SeO<sub>2</sub> (3.00 mmol, 1 equiv), 1.5 mL of 1,4-dioxane (1.98 M) and 0.1 mL of H<sub>2</sub>O (41.6 M) was added *p*-substituted acetophenone (3.00 mmol, 1 equiv). The mixture was refluxed overnight and after cooling to room temperature, the solvent was removed via rotary evaporation. 7.2 mL of H<sub>2</sub>O (0.416 M) was added to the crude residue, and the mixture was refluxed for another 5 h. The mixture was allowed to cool to room temperature then placed in an ice-water bath to give an off-white precipitate that was filtered and dried in vacuo. Employing a reported diazotization procedure,<sup>29</sup> approximately 1 mmol of the crude solid was dissolved in 2.0 mL of CHCl<sub>3</sub> (0.5 M) along with 186 mg of TsNHNH<sub>2</sub> (0.999 mmol, 1 equiv) and 977 mg of Cs<sub>2</sub>CO<sub>3</sub> (3.00 mmol, 3 equiv). The mixture was stirred for 5 min at room temperature. 50 mL of H<sub>2</sub>O was added, and the mixture was extracted with EtOAc (3 x 40 mL). The combined organic layers were washed with brine (50 mL) and dried over MgSO<sub>4</sub>. The MgSO<sub>4</sub> was filtered, and the solvent was removed via rotary evaporation to give a yellow amorphous residue that was purified by silica gel flash chromatography to give pure diazoketone (R = OCH<sub>3</sub> (68%), Br (61%), CF<sub>3</sub> (25%) yields over three steps). All spectroscopic data were in accordance with the published values (–OCH<sub>3</sub>,<sup>30</sup> –Br,<sup>30</sup> and –CF<sub>3</sub>.<sup>31</sup>).

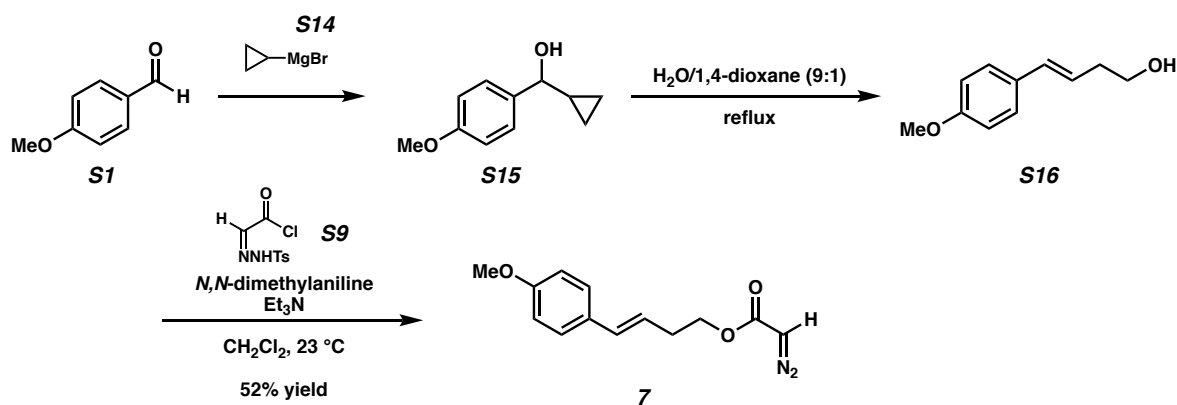

**Diazoacetate 7.** To synthesize diazoacetate **13**, the procedure of McCormick procedure was followed to synthesize carbinol **S15**,<sup>32</sup> which was rearranged to homoallylic alcohol **S16** using the conditions reported by Qu.<sup>33</sup> A modification of the Corey and Myers protocol<sup>24</sup> for the synthesis of diazoacetates was then followed to furnish diazoacetate **13**. At room temperature, *N,N*-dimethylaniline (0.150 mL, 1.20 mmol, 1.2 equiv) was added dropwise to a solution of dry dichloromethane (1.60 mL) containing glyoxalyl chloride tosylhydrazone (287 mg, 1.10 mmol, 1.1 equiv) and alcohol **S16** (178 mg, 1.00 mmol). The resulting mixture was stirred at room temperature for 1 h. Triethylamine (0.700 mL, 5.00 mmol, 5.0 equiv) was added, and the resulting mixture was stirred for 30 min, before being poured into water (5.0 mL). The resulting mixture was extracted with Et<sub>2</sub>O (3 x 5 mL). The combined organic extracts were washed once with brine (15 mL) and dried over MgSO<sub>4</sub>. The MgSO<sub>4</sub> was filtered and the solvent removed via rotary evaporation to give a yellow oil, which was purified by silica gel flash chromatography (9:1 hexanes/EtOAc eluent) to give diazoacetate **7** (118 mg, 48% yield) as a yellow oil that solidified upon cooling.

**TLC:** R<sub>f</sub> = 0.28 in 9:1 hexanes/EtOAc, visualized by UV.

**<sup>1</sup>H NMR** (400 MHz; CDCl<sub>3</sub>): δ 7.28 (d, *J* = 8.8 Hz, 2H), 6.85 (d, *J* = 8.8 Hz, 2H), 6.41 (d, *J* = 16.0 Hz, 1H), 6.01 (dt, *J* = 16.0, 7.2 Hz, 1H), 4.75 (br. s, 1H), 4.26 (t, *J* = 6.6 Hz, 2H), 3.80 (s, 3H), 2.54 (app. qd, *J* = 6.8, 1.2 Hz, 2H).

**<sup>13</sup>C NMR** (100 MHz; CDCl<sub>3</sub>): δ 159.1, 132.1, 130.2, 127.4, 125.4, 123.2, 114.1, 64.4, 55.4, 46.4, 32.7.

**IR** (ATR, neat): 2109, 1692, 1608, 1511, 1395, 1359, 1246, 1175, 1033 cm<sup>-1</sup>.

**HRMS** (ESI+): *m/z* calc'd for (M + Na)<sup>+</sup> [C<sub>13</sub>H<sub>14</sub>N<sub>2</sub>O<sub>3</sub> + Na]<sup>+</sup>: 269.0897, found 269.0898.

## References

- <sup>1</sup> McDaniel, A. M.; Tseng, H.; Damrauer, N. H.; Shores, M. P. *Inorg. Chem.* **2010**, *49*, 7981–7991.
- <sup>2</sup> Ischay, M. A.; Lu, Z.; Yoon, T. P. *J. Am. Chem. Soc.* **2010**, *132*, 8572–8574.
- <sup>3</sup> Yueh, W.; Bauld, N. L. *J. Am. Chem. Soc.* **1995**, *117*, 5671–5676.
- <sup>4</sup> Dumitrescu, L.; Azzouzi-Zriba, K.; Bonnet-Delpon, D.; Crousse, B. *Org. Lett.* **2011**, *13*, 692–695.
- <sup>5</sup> Guzic, F. S.; Luzzio, F. A. *J. Org. Chem.* **1983**, *48*, 2434–2437.
- <sup>6</sup> (a) Hilt, G.; Galbiati, F. *Org. Lett.* **2006**, *8*, 2195–2198. (b) Kamigata, N.; Satoh, M.; Fukushima, T. *Bull. Chem. Soc. Jpn.* **1990**, *63*, 2118–2120.
- <sup>7</sup> (a) Sacconi, L.; Ciampolini, M. *J. Chem. Soc.* **1964**, 276–280. (b) Charles, R. G. *J. Org. Chem.* **1957**, *22*, 677–679.
- <sup>8</sup> Doyle, M. P.; Austin, R. E.; Bailey, A. S.; Dwyer, M. P.; Dyatkin, A. B.; Kalinin, A. V.; Kwan, M. M. Y.; Liras, S.; Oalmann, C. J.; Pieters, R. J.; Protopopova, M. N.; Raab, C. E.; Roos, G. H. P.; Zhou, Q.-L.; Martin, S. F. *J. Am. Chem. Soc.* **1995**, *117*, 5763–5775.
- <sup>9</sup> (a) Blum, T. R.; Zhu, Y.; Nordeen, S. A.; Yoon, T. P. *Angew. Chem. Int. Ed.* **2014**, *53*, 11056–11059. (b) Ischay, M. A.; Ament, M. S.; Yoon, T. P. *Chem. Sci.* **2012**, *3*, 2801–2811.
- <sup>10</sup> Linseis, M.; Zališ, S.; Zabel, M.; Winter, R. F. *J. Am. Chem. Soc.* **2012**, *134*, 16671–16692.
- <sup>11</sup> Rosocha, G.; Batey, R. A. *Tetrahedron* **2013**, *69*, 8758–8768.
- <sup>12</sup> (a) Kluger, R.; Grant, A. S.; Bearne, S. L.; Trachsel, M. R. *J. Org. Chem.* **1990**, *55*, 2864–2868. (b) Khalaf, A. I.; Pitt, A. R.; Scobie, M.; Suckling, C. J.; Urwin, J.; Waigh, R. D.; Fishleigh, R. V.; Young, S. C.; Wylie, W. A. *Tetrahedron* **2000**, *56*, 5225–5239.
- <sup>13</sup> Gesmundo, N. J.; Grandjean, J. -M., M.; Nicewicz, D. A. *Org. Lett.* **2015**, *17*, 1316–1319.
- <sup>14</sup> Stevenson, S. M.; Shores, M. P.; Ferreira, E. M. *Angew. Chem. Int. Ed.* **2015**, *54*, 6506–6510.
- <sup>15</sup> Lin, S.; Ischay, M. A.; Fry, C. G. Yoon, T. P. *J. Am. Chem. Soc.* **2011**, *133*, 19350–19353.
- <sup>16</sup> Belger, C.; Plietker, B. *Chem. Commun.* **2012**, *48*, 5419–5421.
- <sup>17</sup> Baldwin, L. J.; Pakray, S.; Castle, R. N.; Lee, M. L. *J. Heterocyclic Chem.* **1985**, *22*, 1667–1669.
- <sup>18</sup> Zhou, X.; Luo, J.; Liu, J.; Peng, S.; Deng, G. -J. *Org. Lett.* **2011**, *13*, 1432–1435.
- <sup>19</sup> Dutta, D.K.; Konwar, D. *Tetrahedron Lett.* **2000**, *41*, 6227–6229.
- <sup>20</sup> Hong, F. -J.; Low, Y. -Y.; Chong, K. -W.; Thomas, N. F.; Kam, T. -S. *J. Org. Chem.* **2014**, *79*, 4528–4543.
- <sup>21</sup> Harder, T.; Wessig, P.; Bendig, J.; Stösser, R. *J. Am. Chem. Soc.* **1999**, *121*, 6580–6588.
- <sup>22</sup> Moody, C. J.; Slawin, A. M. Z.; Willows, D. *Org. Biomol. Chem.* **2003**, *1*, 2716–2722.
- <sup>23</sup> Hodgson, D. M.; Angrish, D. *Chem. Eur. J.* **2007**, *13*, 3470–3479.
- <sup>24</sup> Corey, E. J.; Myers, A. G. *Tetrahedron Lett.* **1984**, *25*, 3559–3562.
- <sup>25</sup> Doyle, M. P.; Dyatkin, A. B. *J. Org. Chem.* **1995**, *60*, 3035–3038.
- <sup>26</sup> Nicewicz, D. A.; Brétéché, G.; Johnson, J. S. *Org. Synth.* **2008**, *85*, 278–286.
- <sup>27</sup> Yu, Z.; Pan, Y.; Wang, Z.; Wang, J.; Lin, Q. *Angew. Chem. Int. Ed.* **2012**, *51*, 10600–10604.
- <sup>28</sup> Huang, L.; Wulff, W. D. *J. Am. Chem. Soc.* **2011**, *133*, 8892–8895.
- <sup>29</sup> Shu, W. -M.; Ma, J. -R.; Zheng, K. -L.; Sun, H. -Y.; Wang, M.; Yang, Y.; Wu, A. -X. *Tetrahedron* **2014**, *70*, 9321–9329.
- <sup>30</sup> Fodor, G.; Kovacs, O. *J. Am. Chem. Soc.* **1949**, *71*, 1045–1048.
- <sup>31</sup> Badal, M. R.; Zhang, M.; Kobayashi, S.; Mishima, M. *Bull. Chem. Soc. Jpn.* **2013**, *86*, 856–863.
- <sup>32</sup> McCormick, J. P.; Fitterman, A. S.; Barton, D. L. *J. Org. Chem.* **1981**, *46*, 4708–4712.
- <sup>33</sup> Li, P. -F.; Yi, C. -B.; Qu, J. *Org. Biomol. Chem.* **2015**, *13*, 5012–5021.

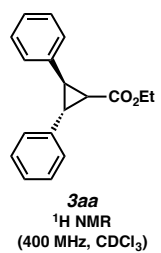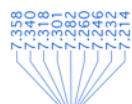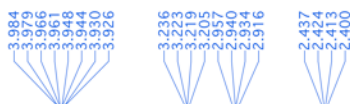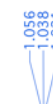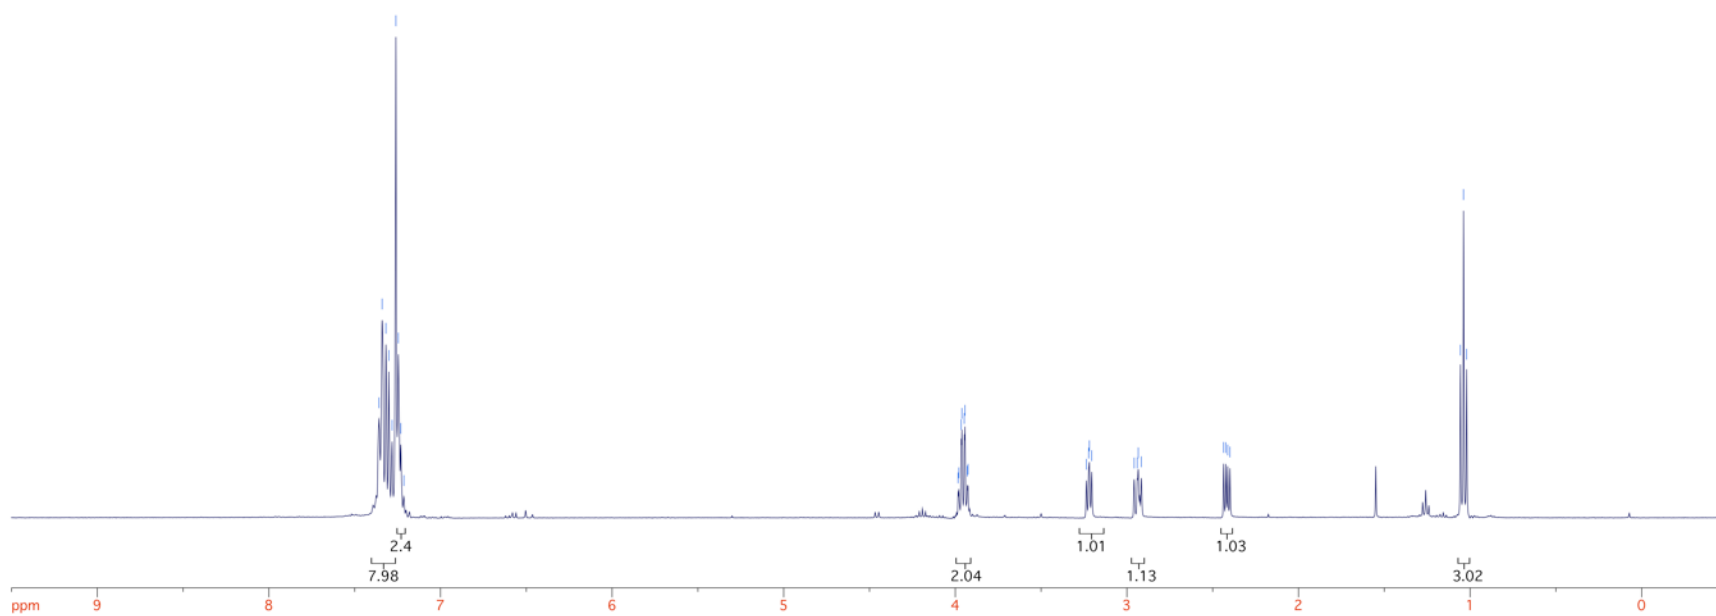



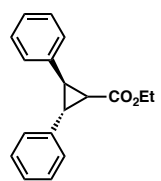

**3aa**  
<sup>13</sup>C NMR  
(100 MHz, CDCl<sub>3</sub>)

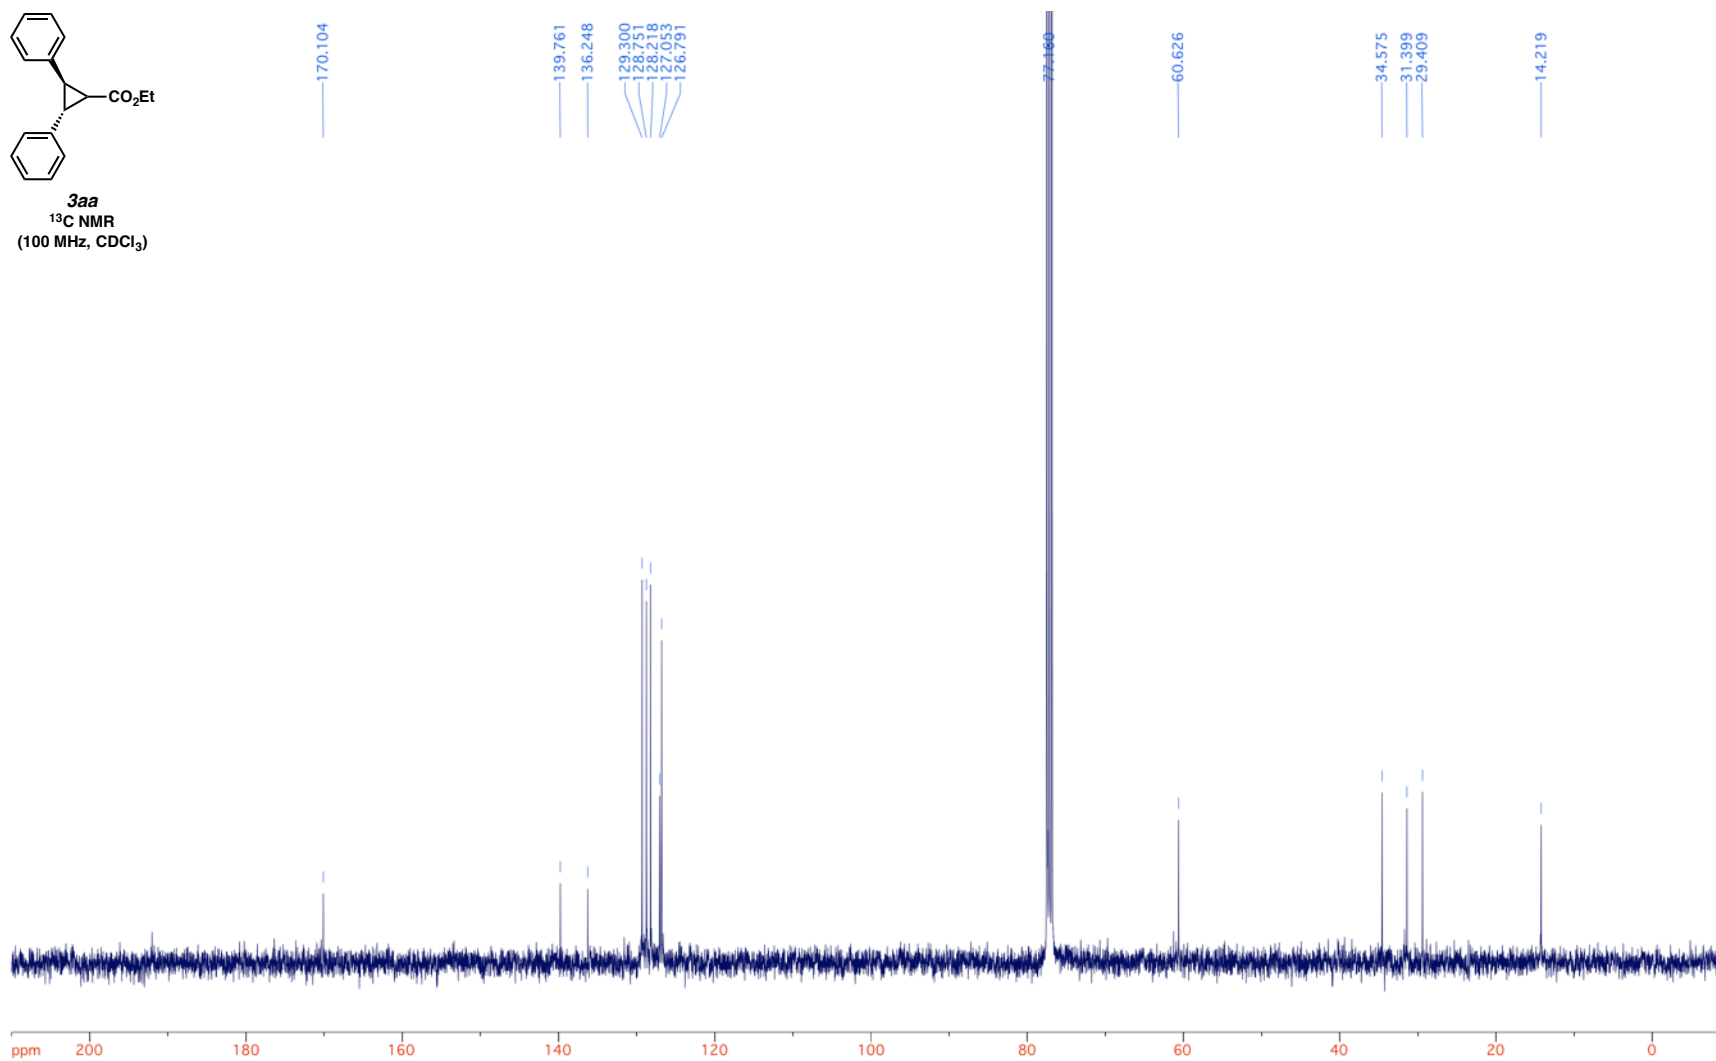

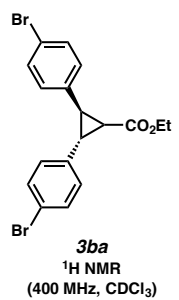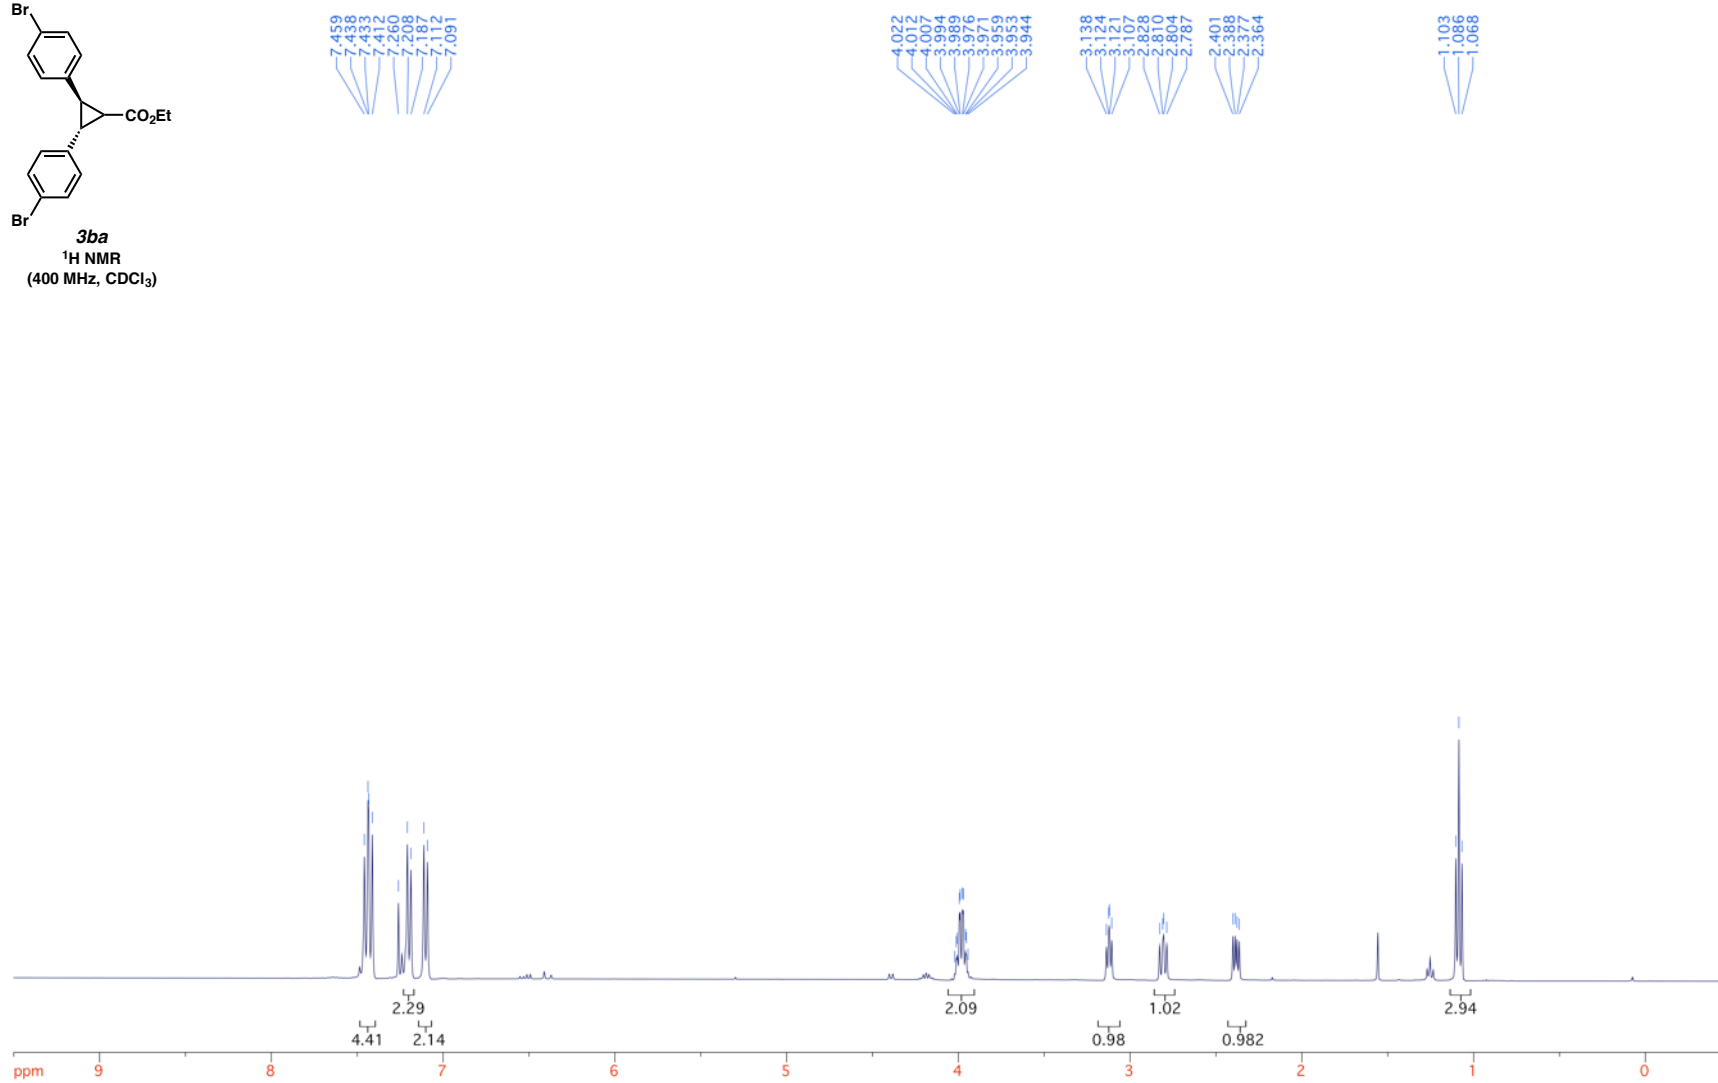

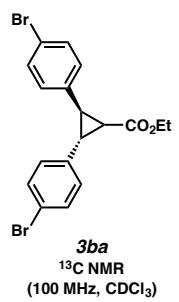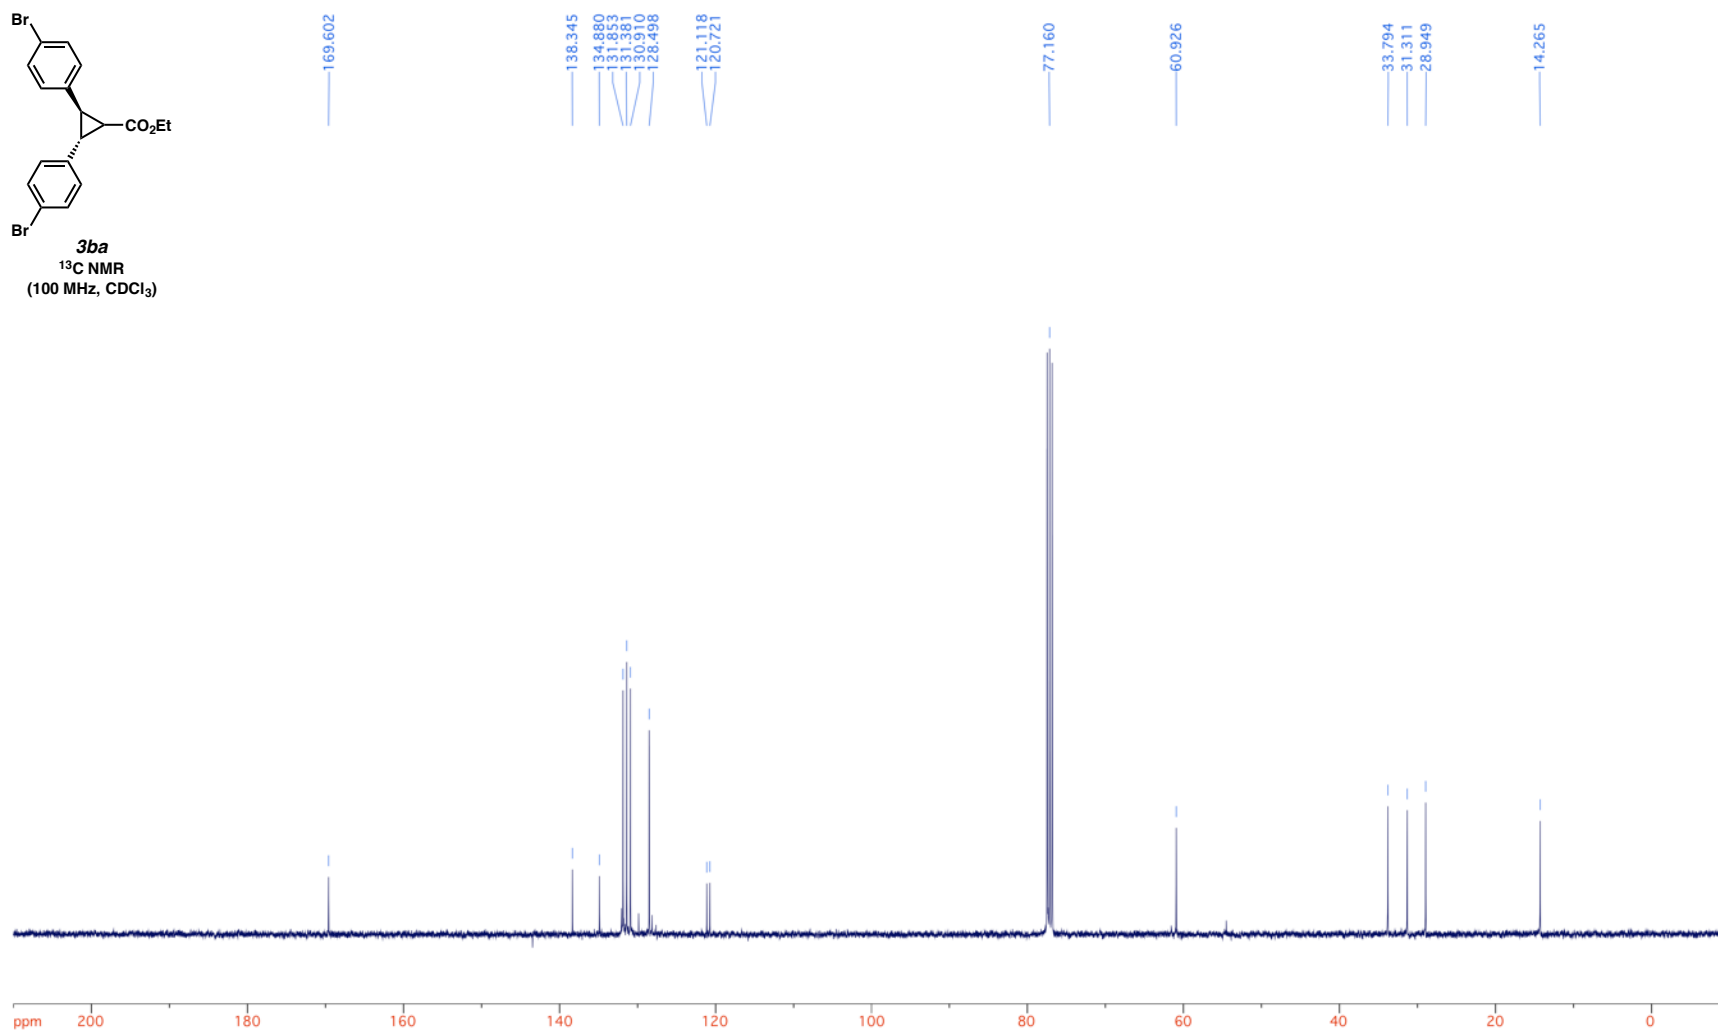

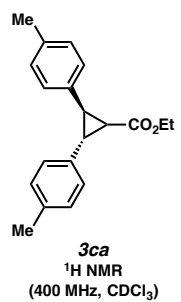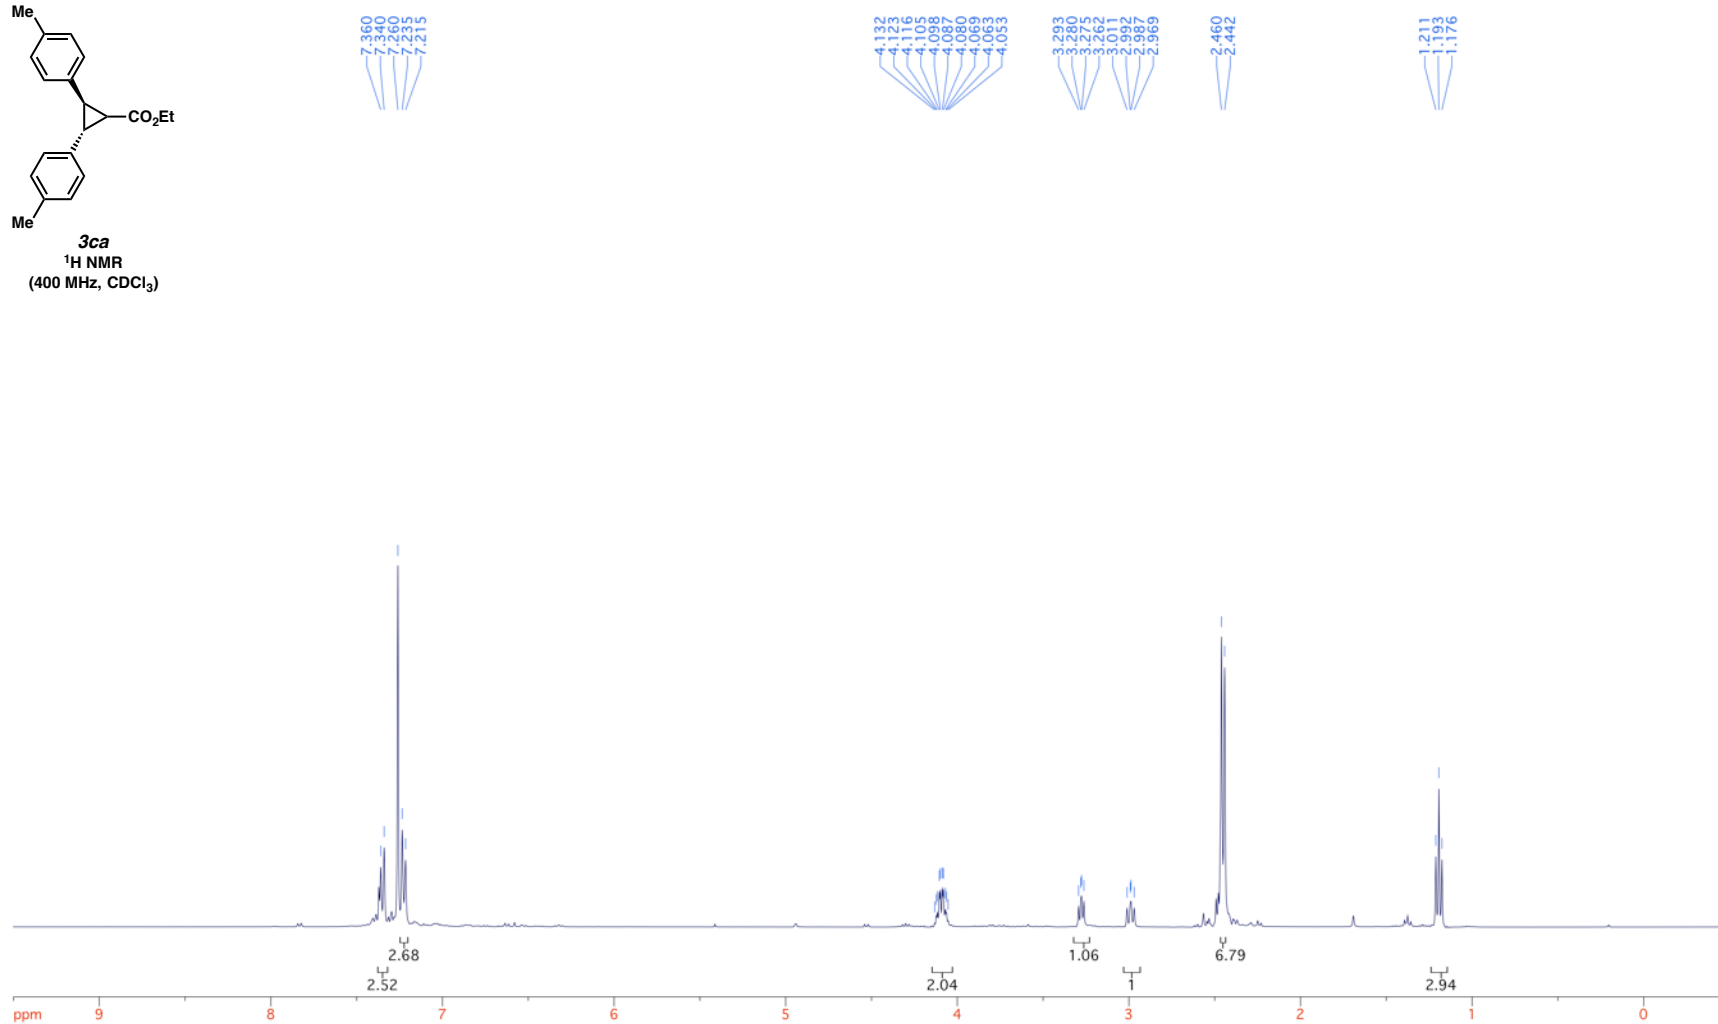

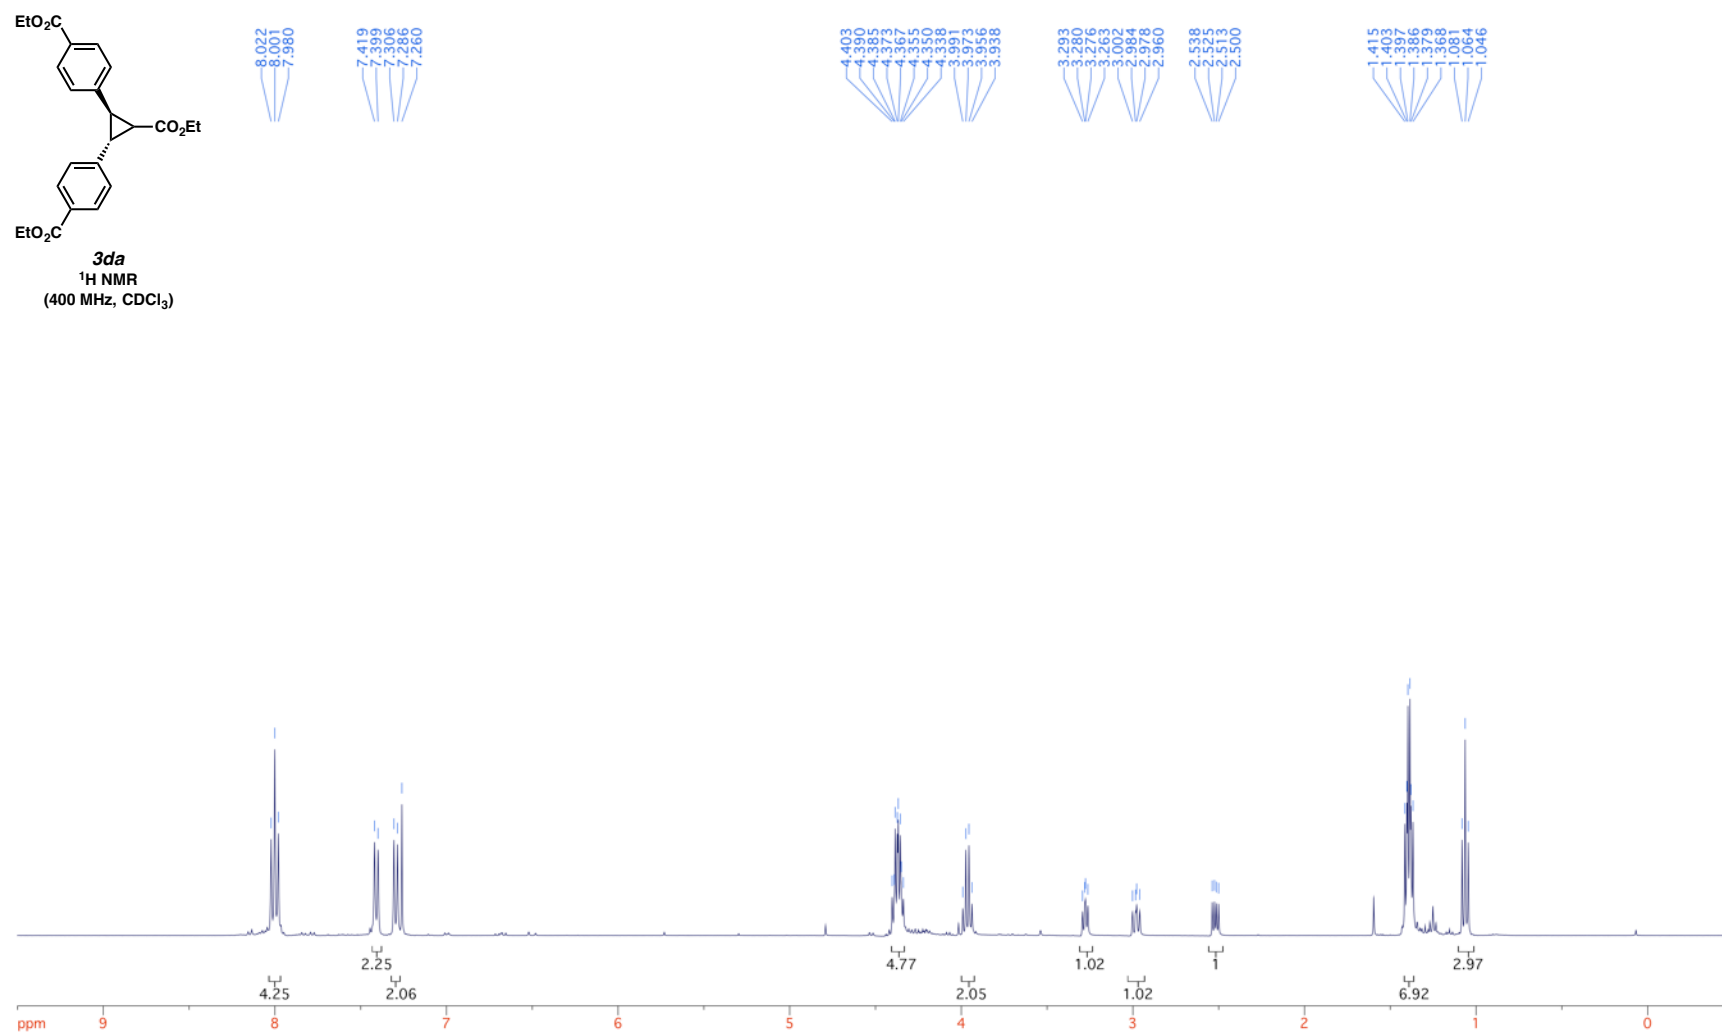

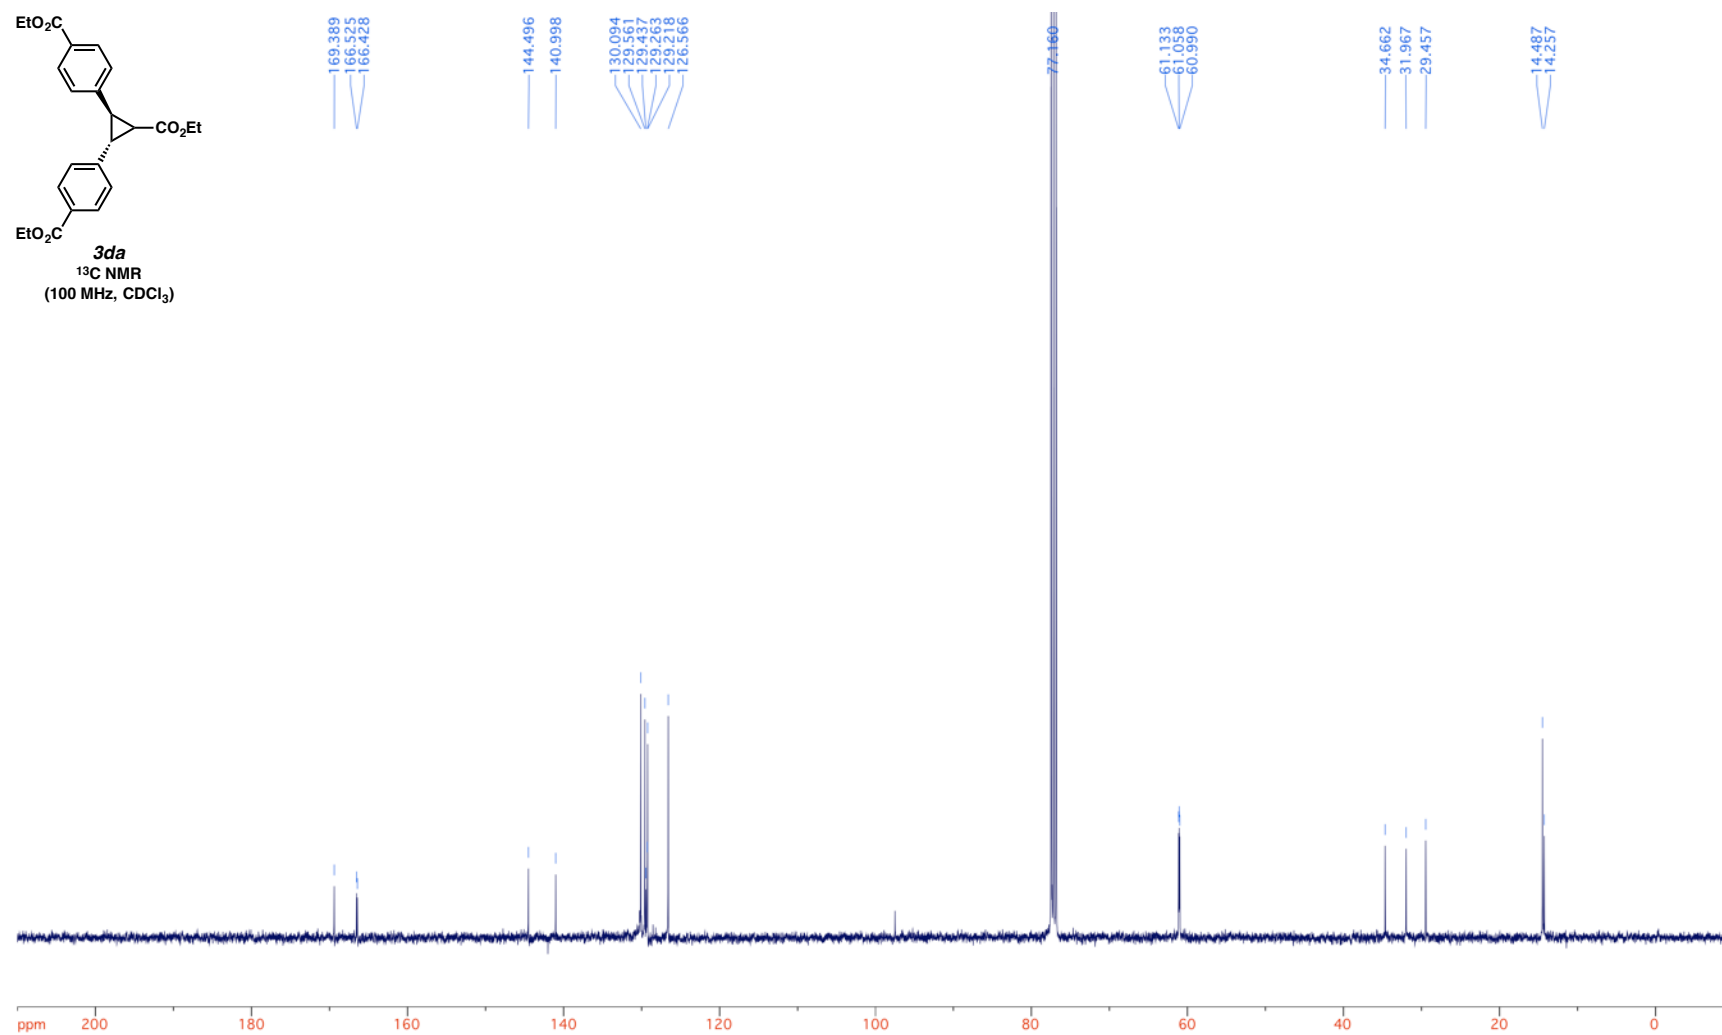

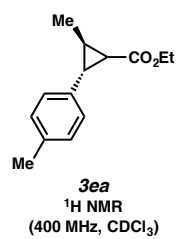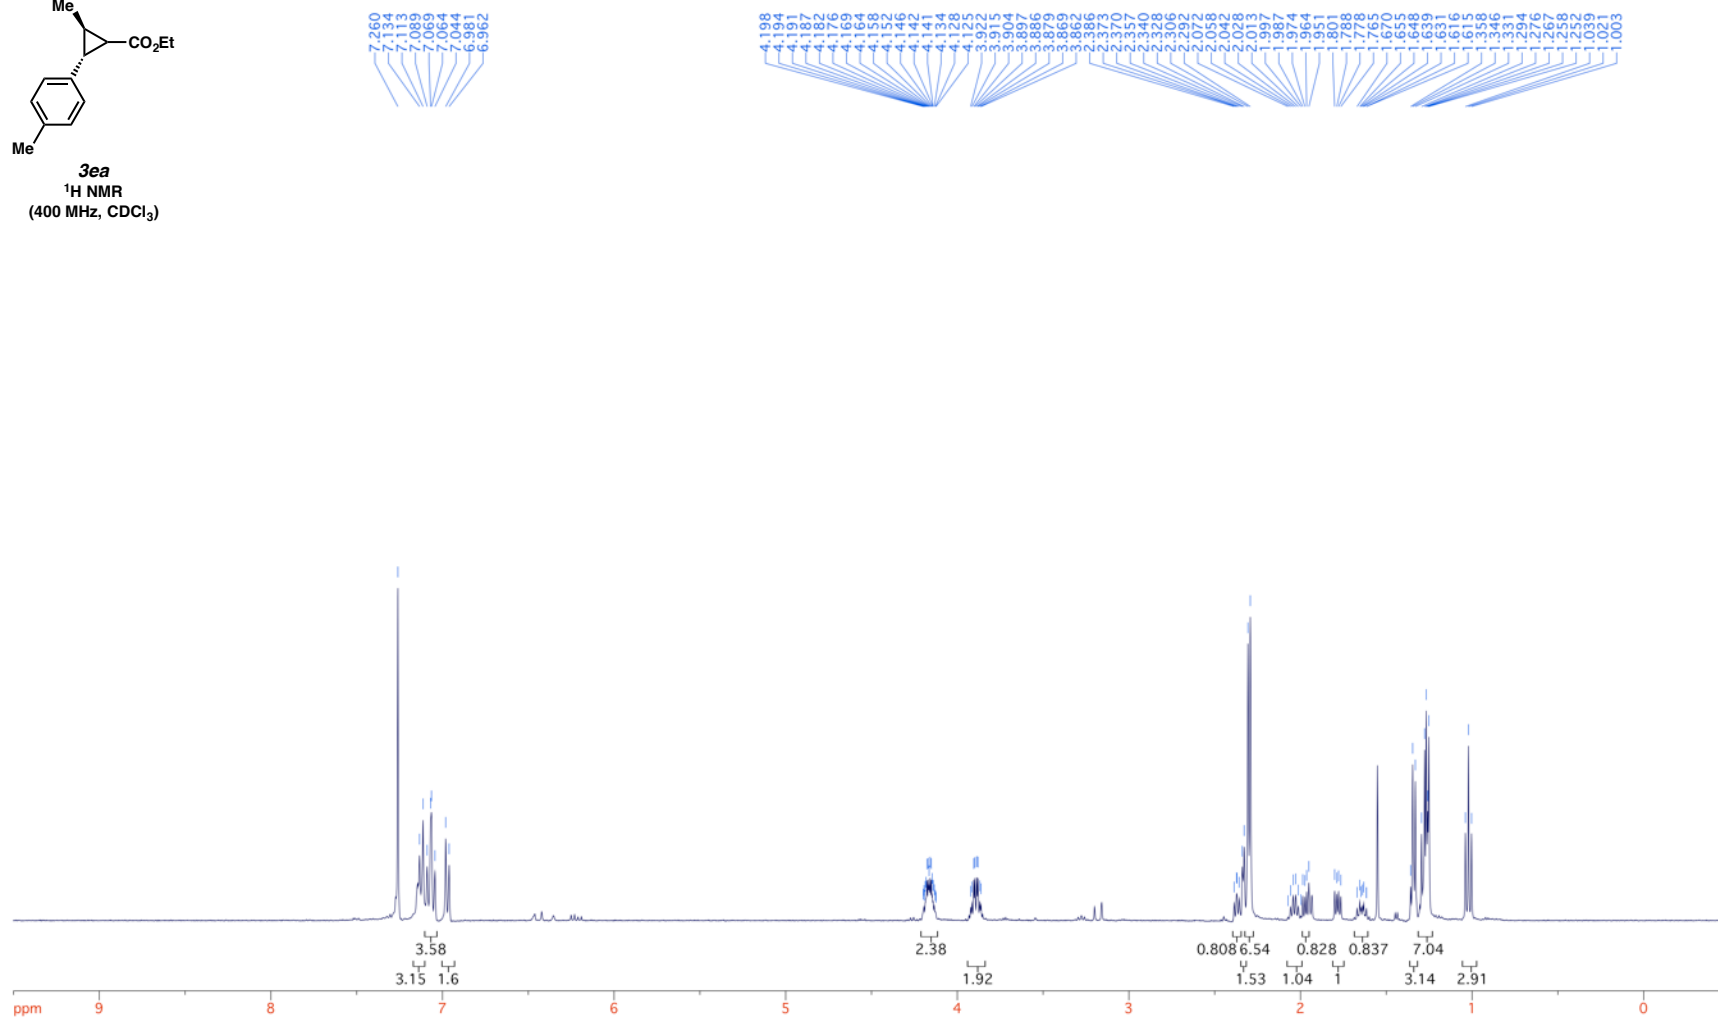

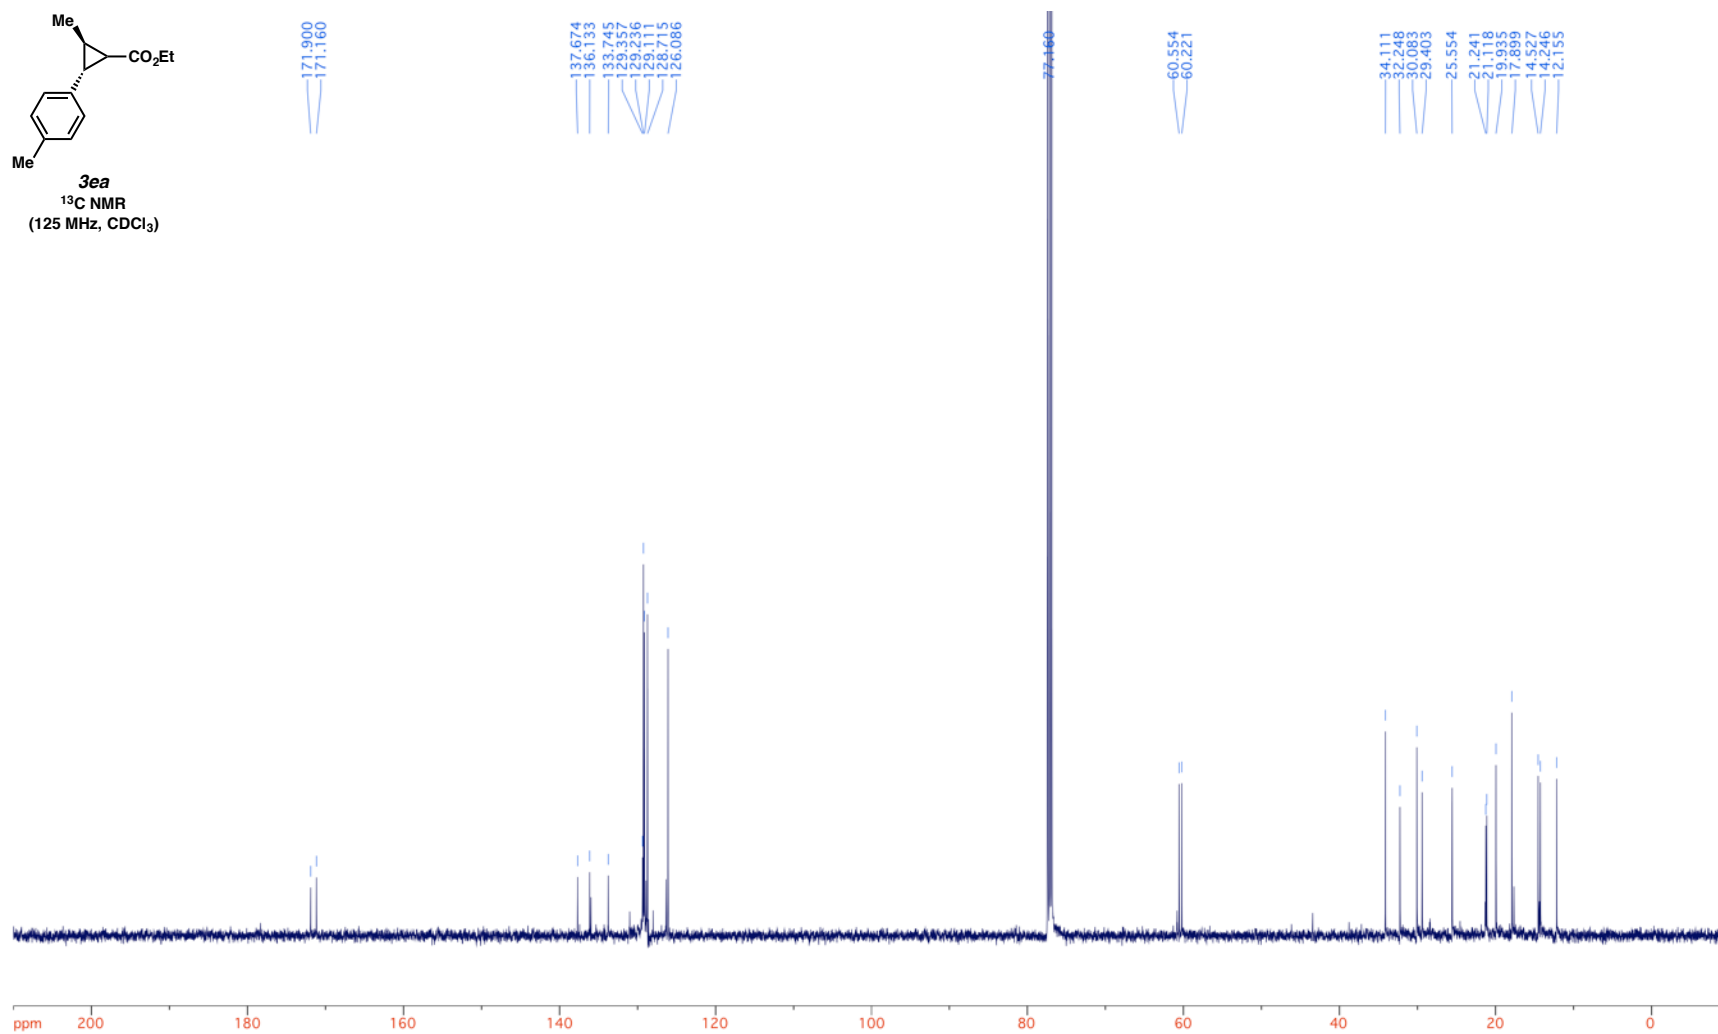



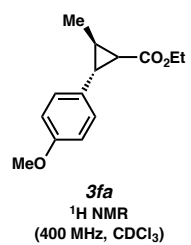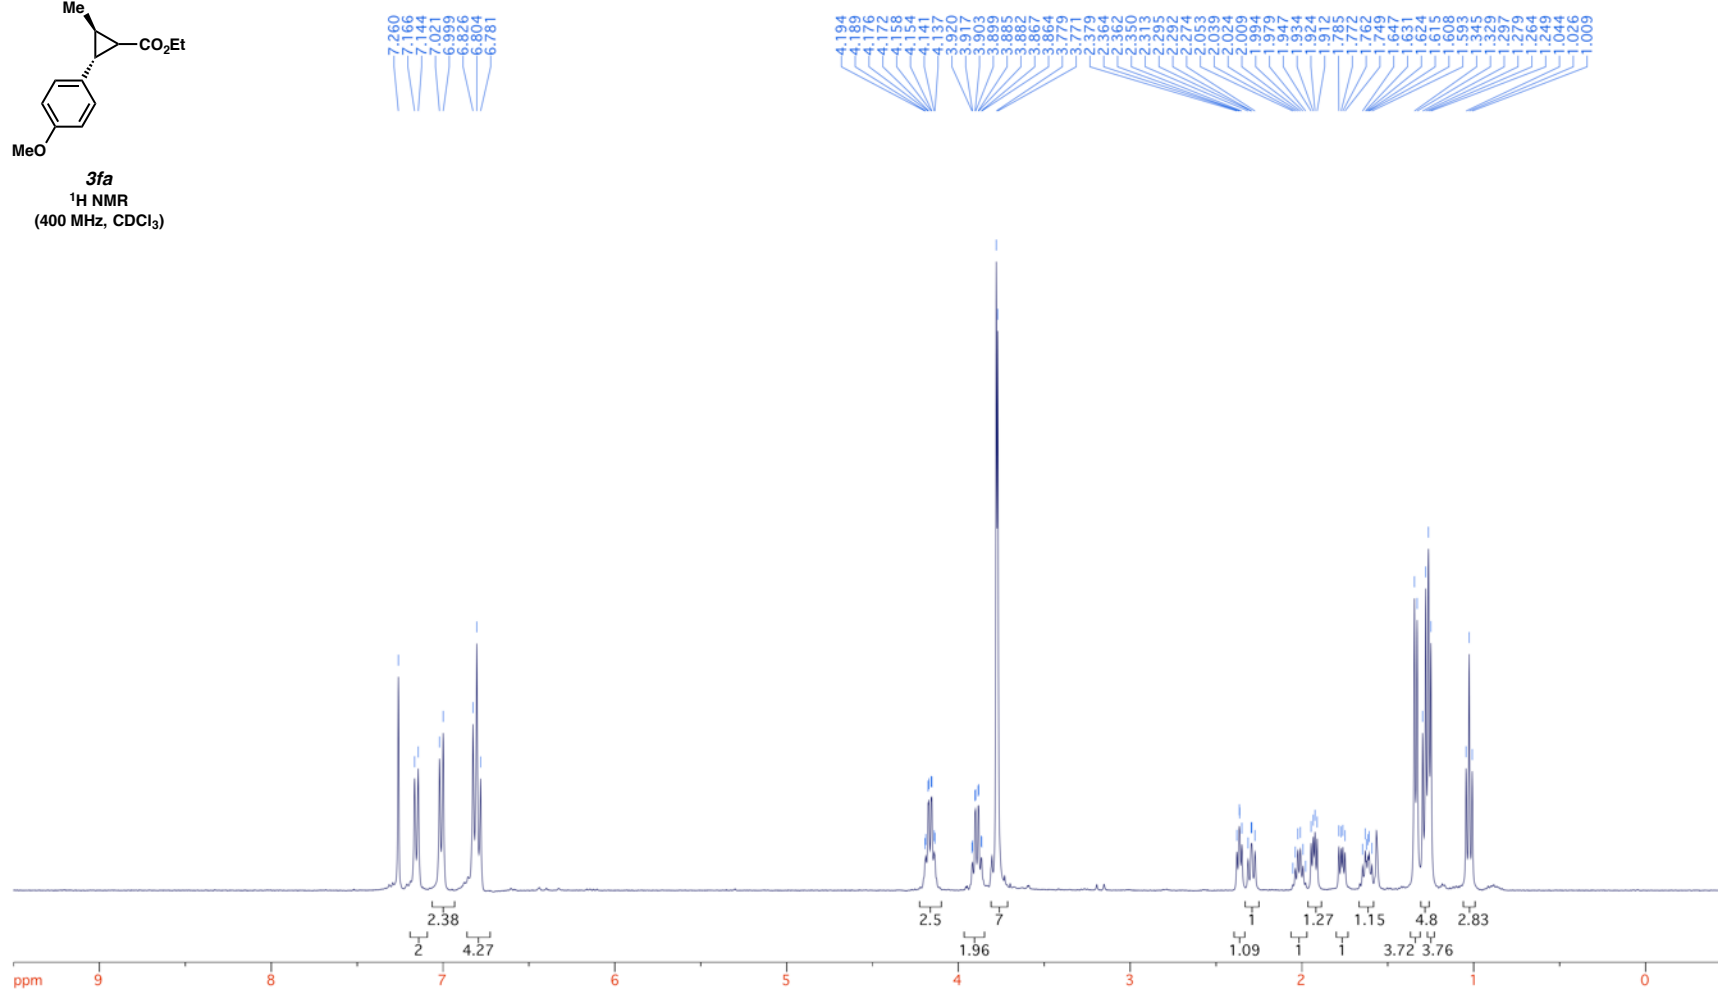

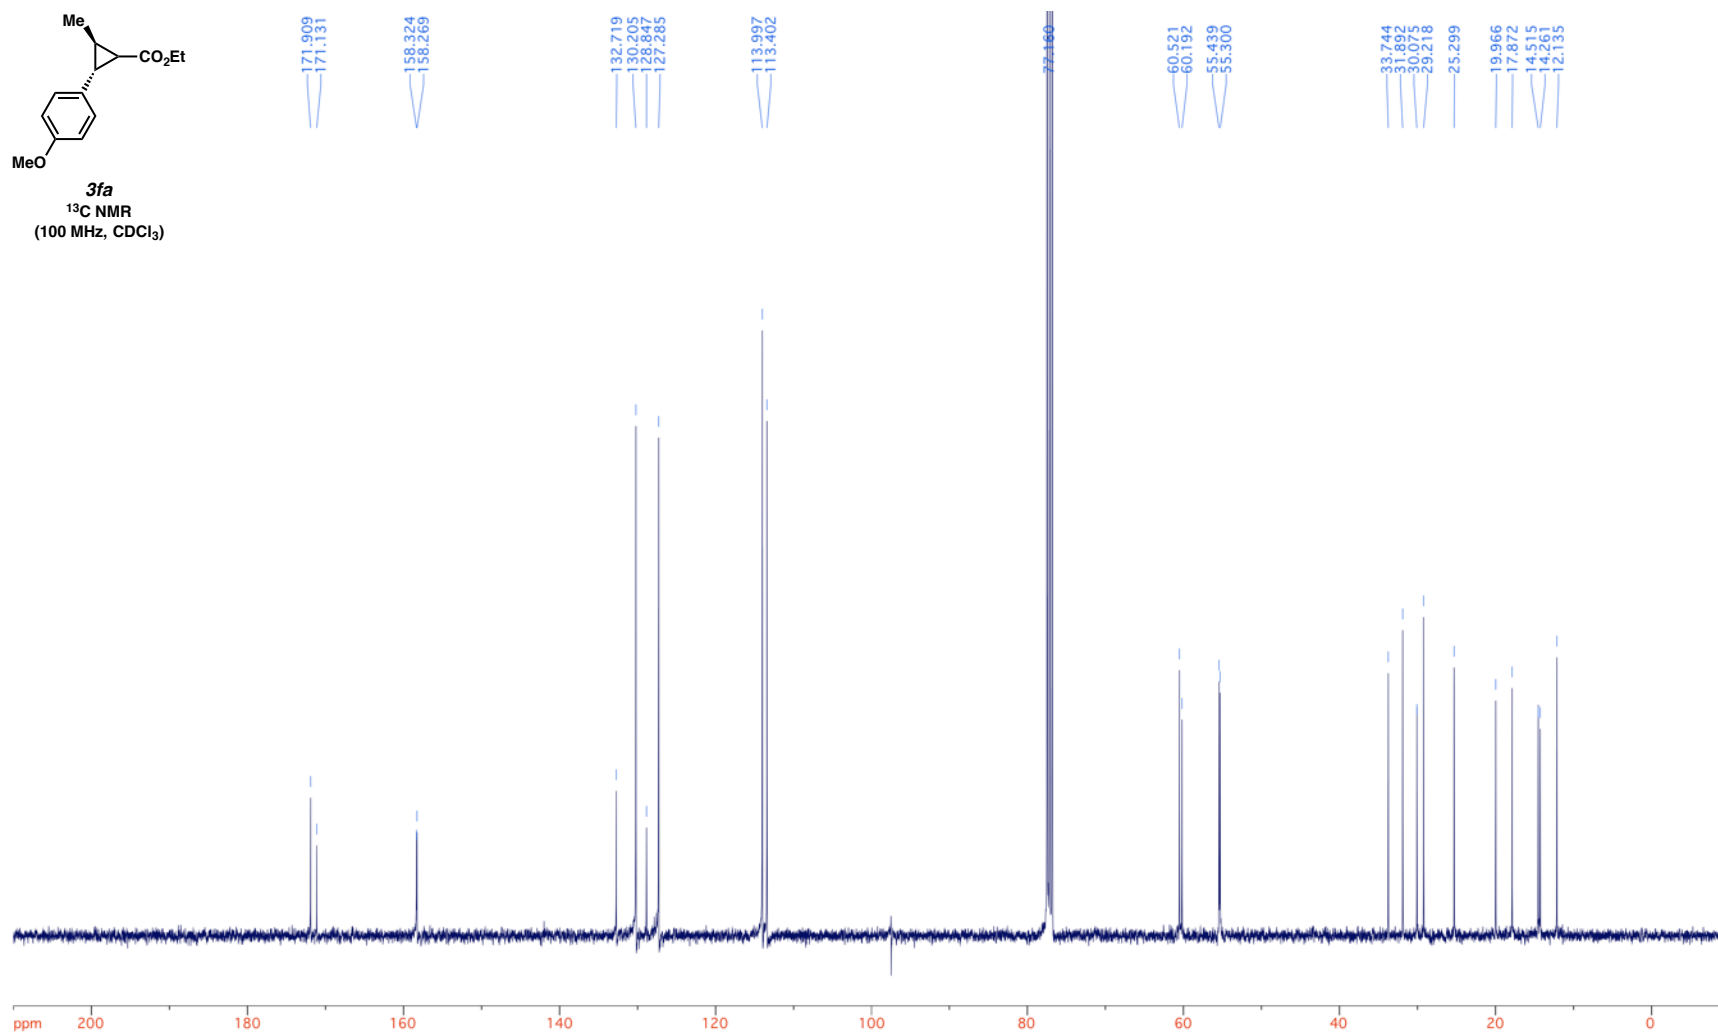

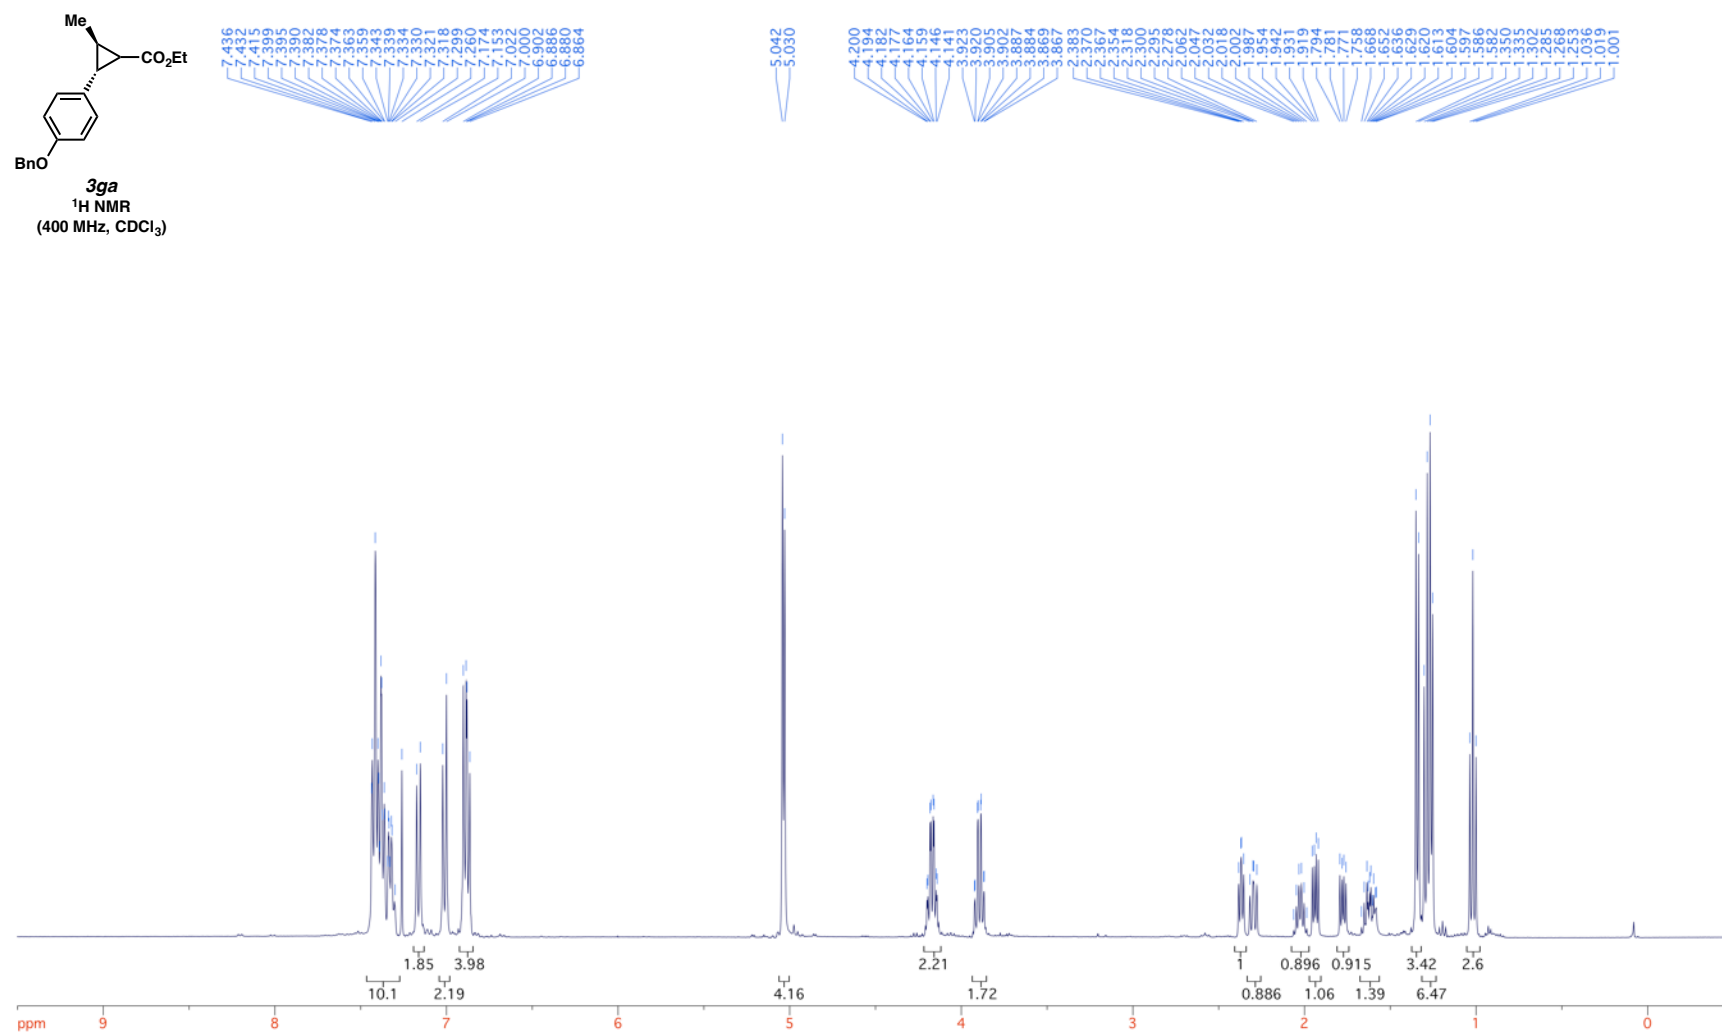

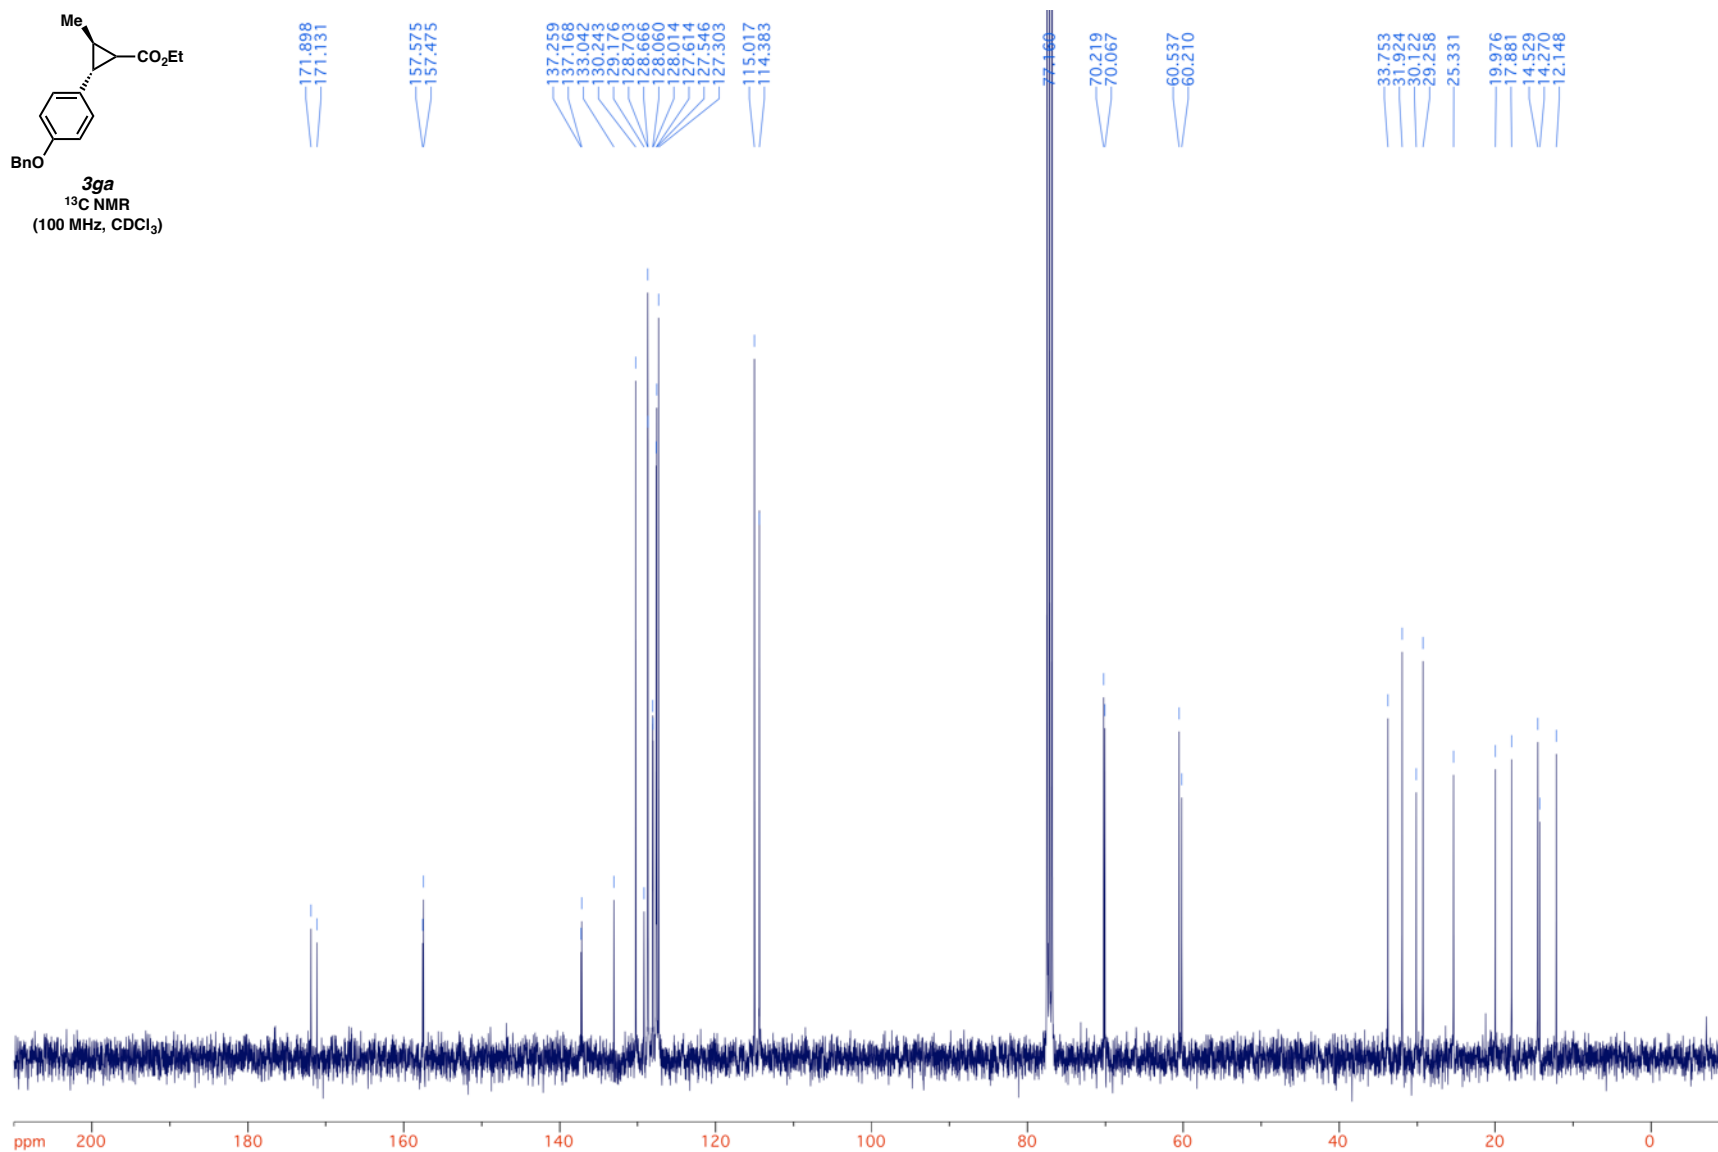

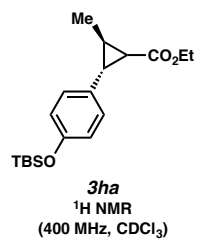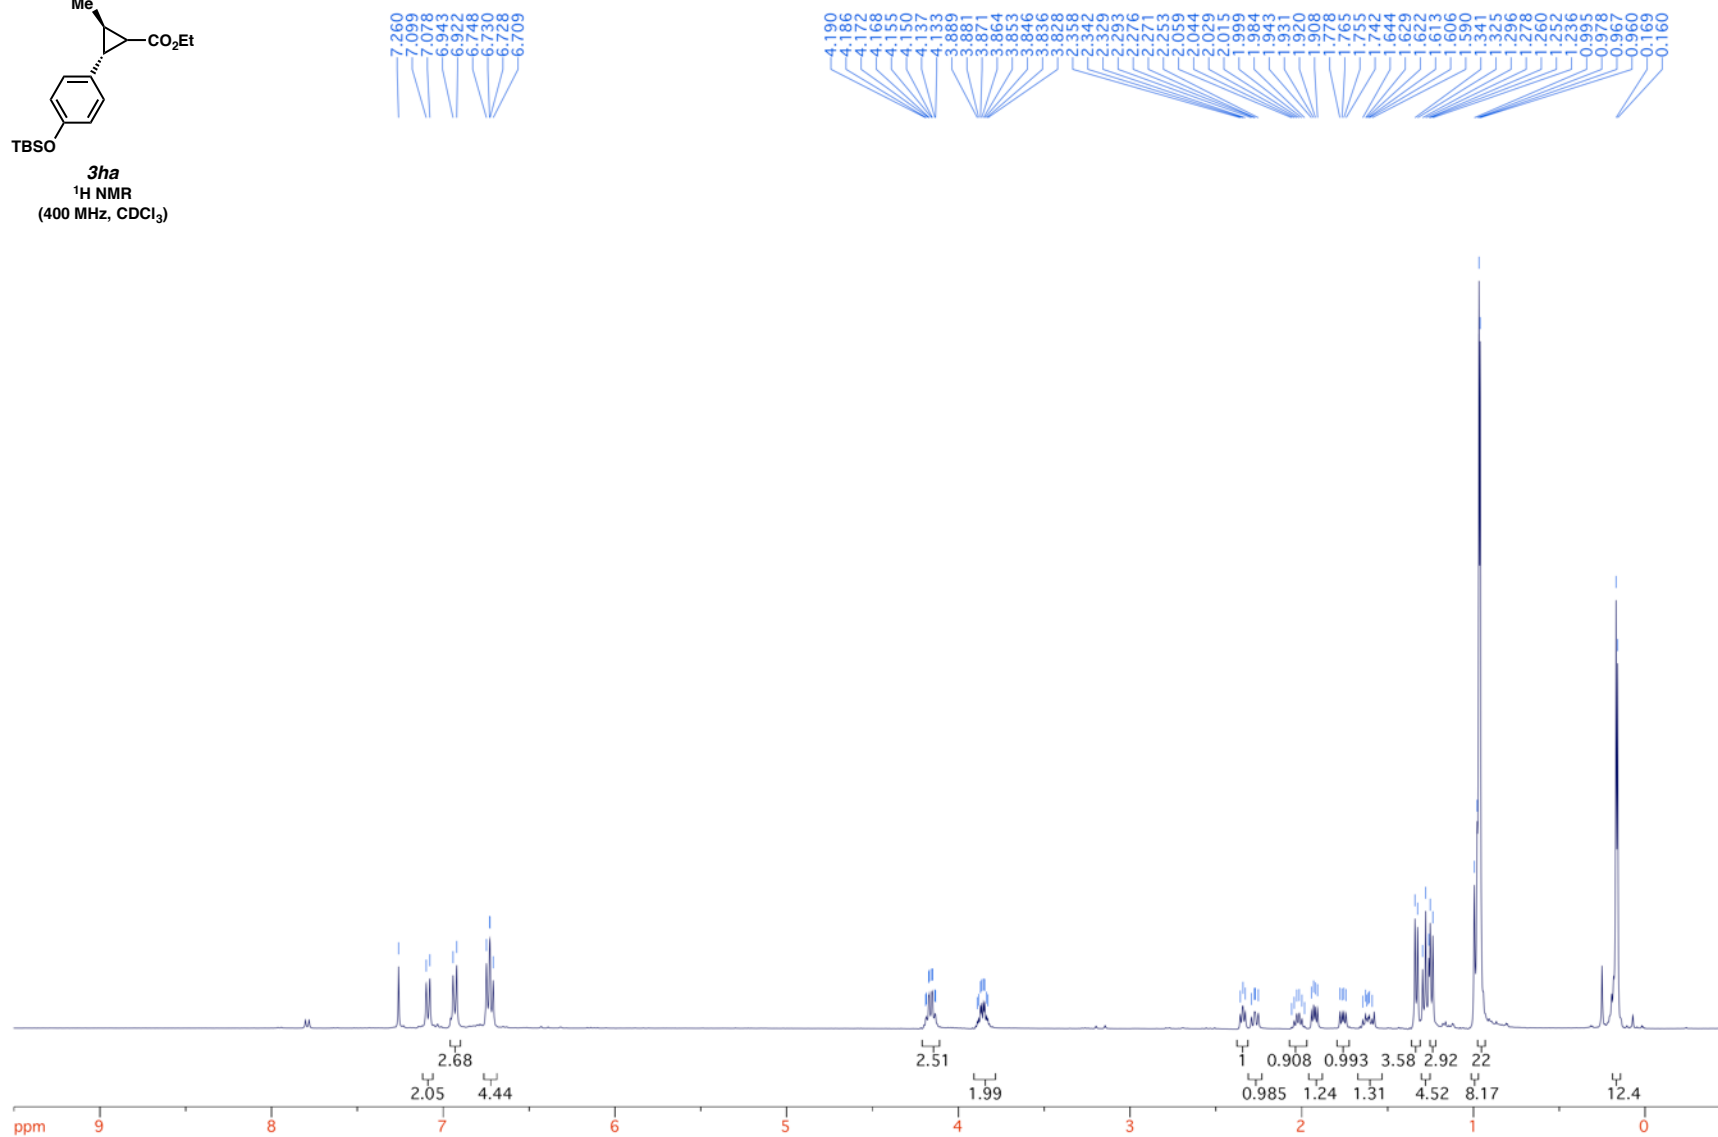

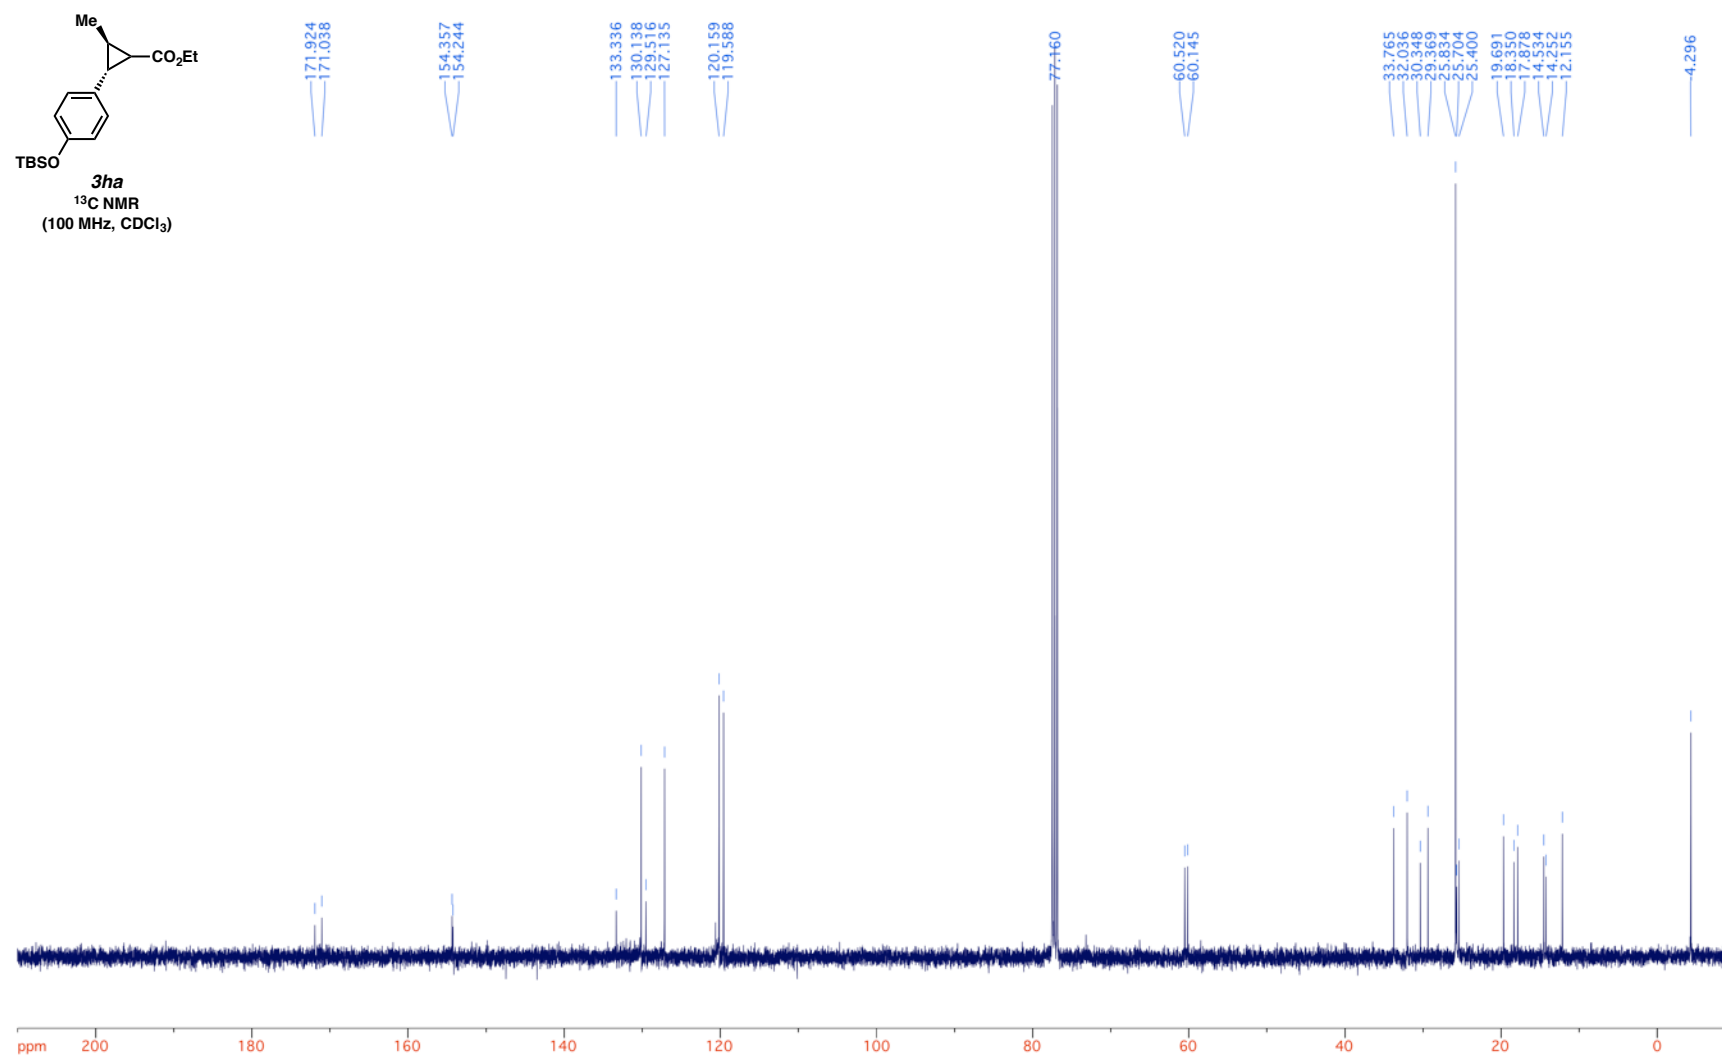

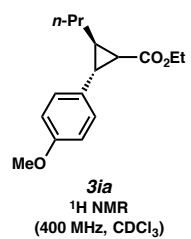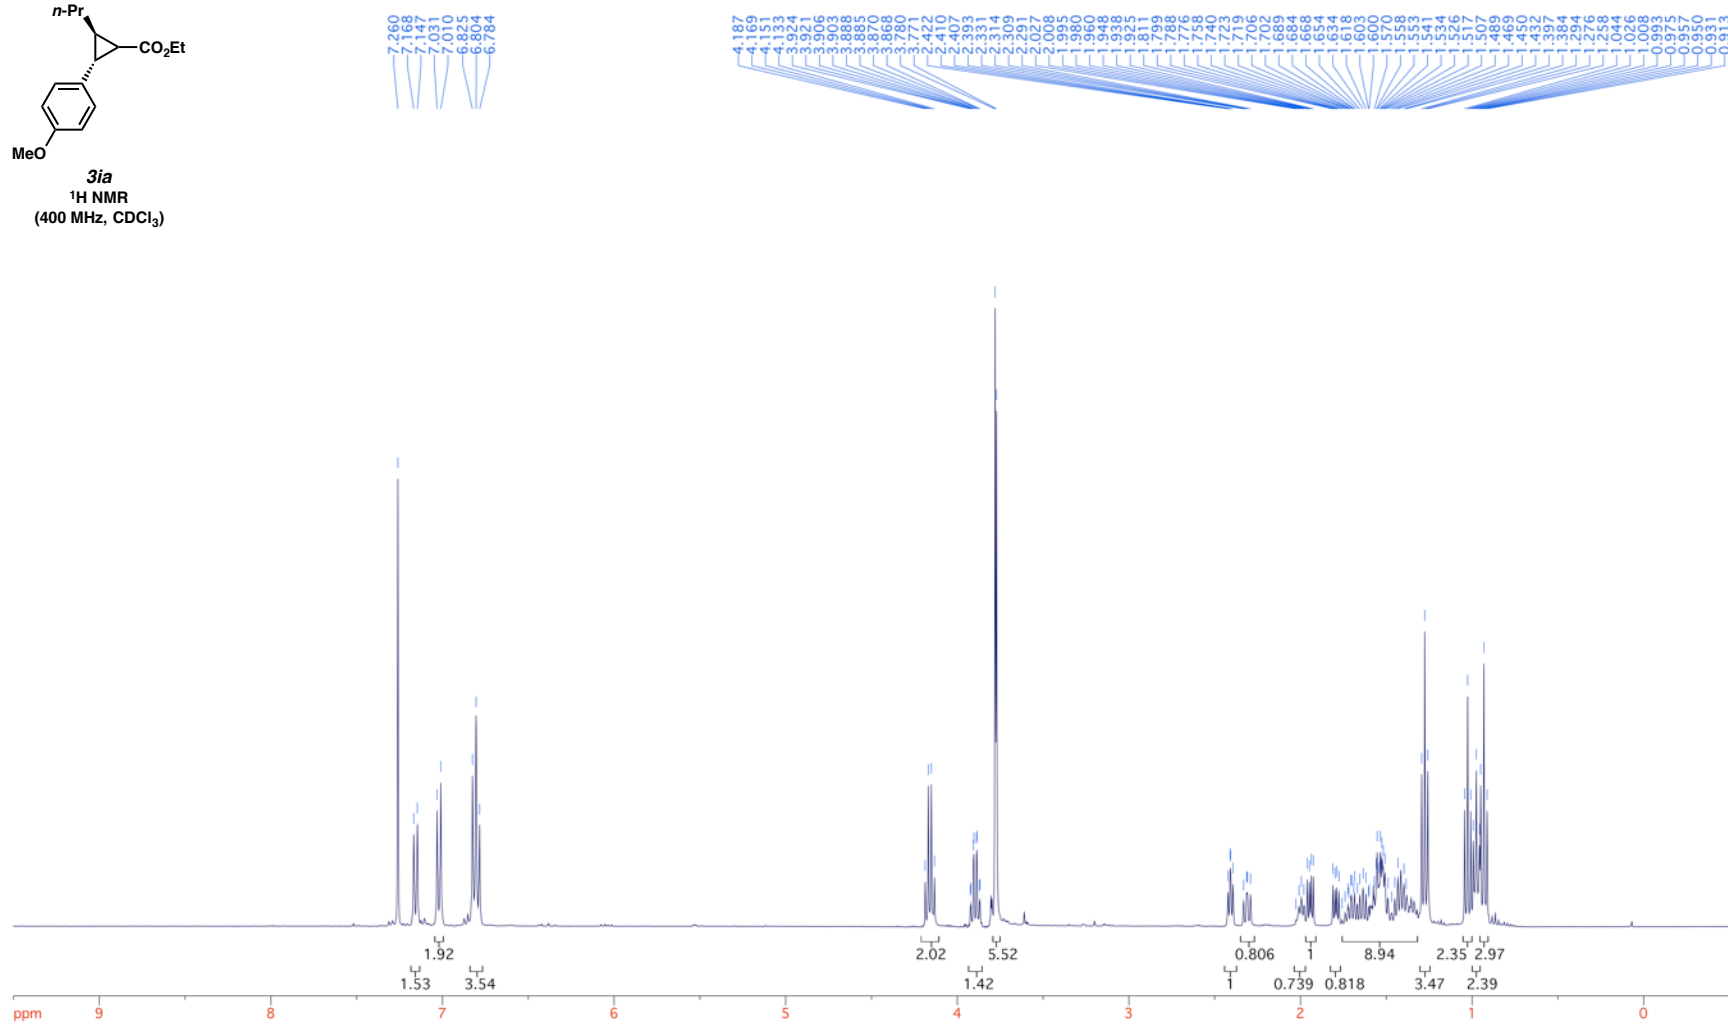

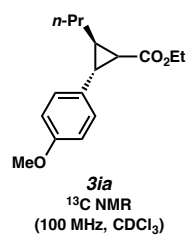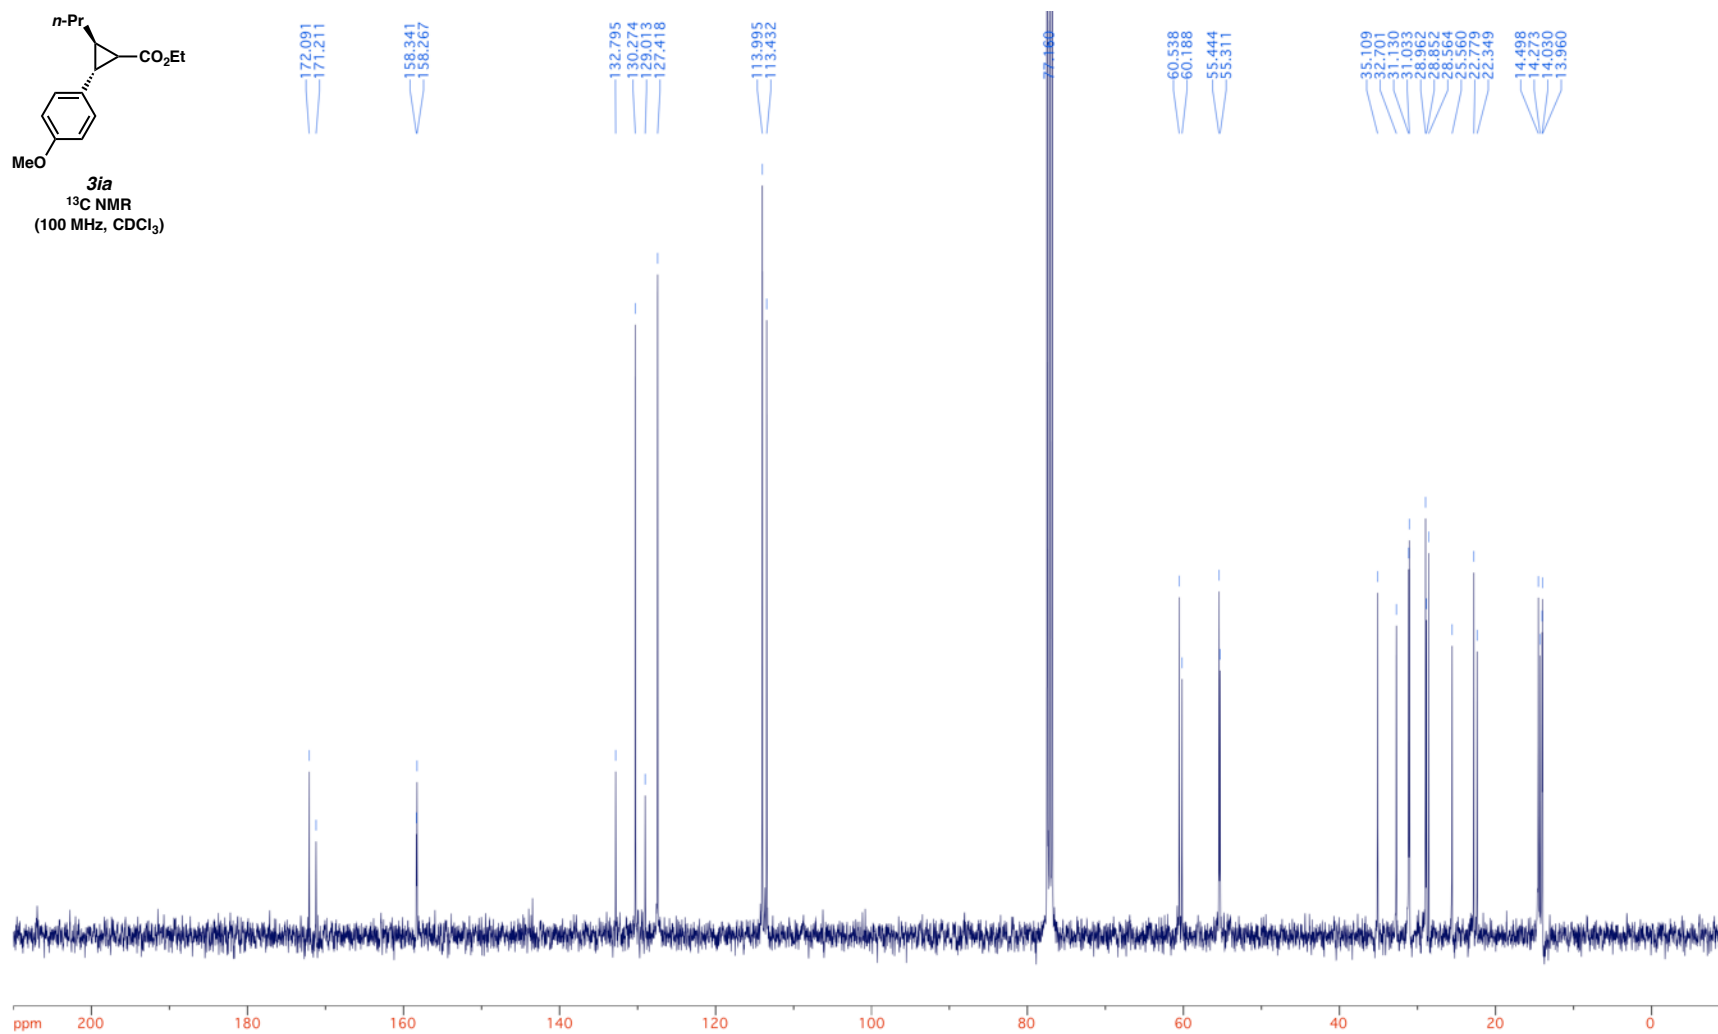



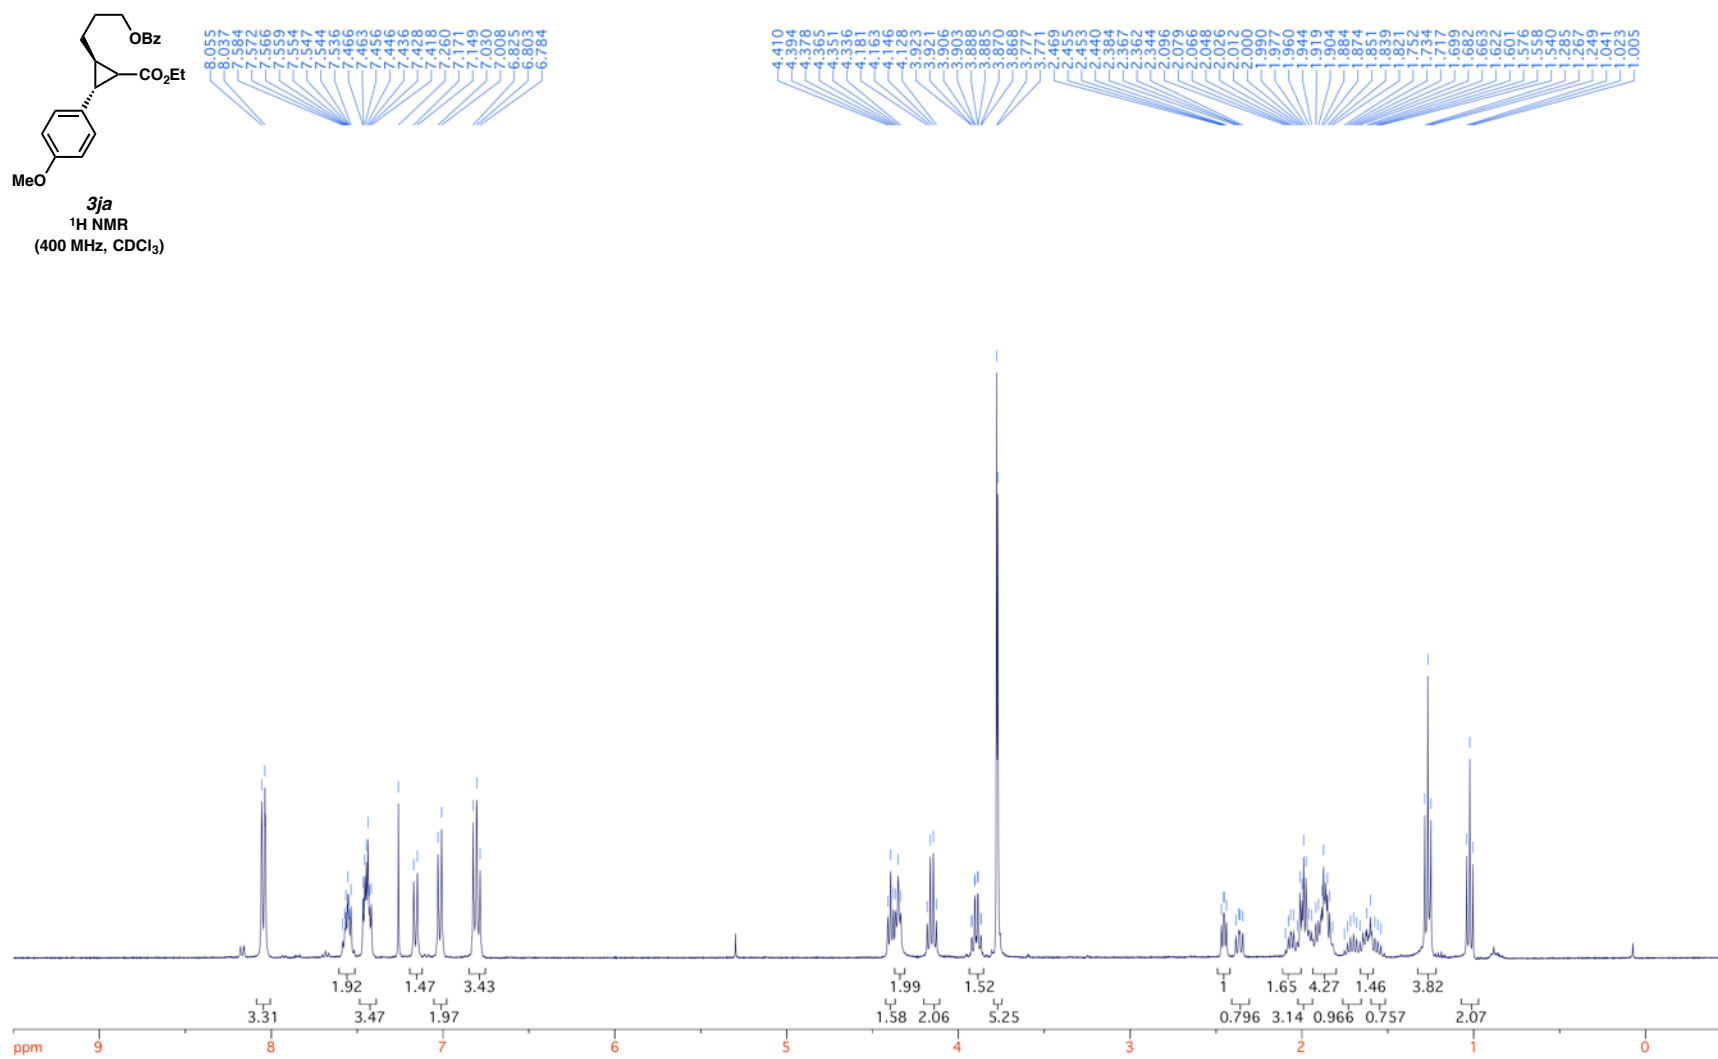

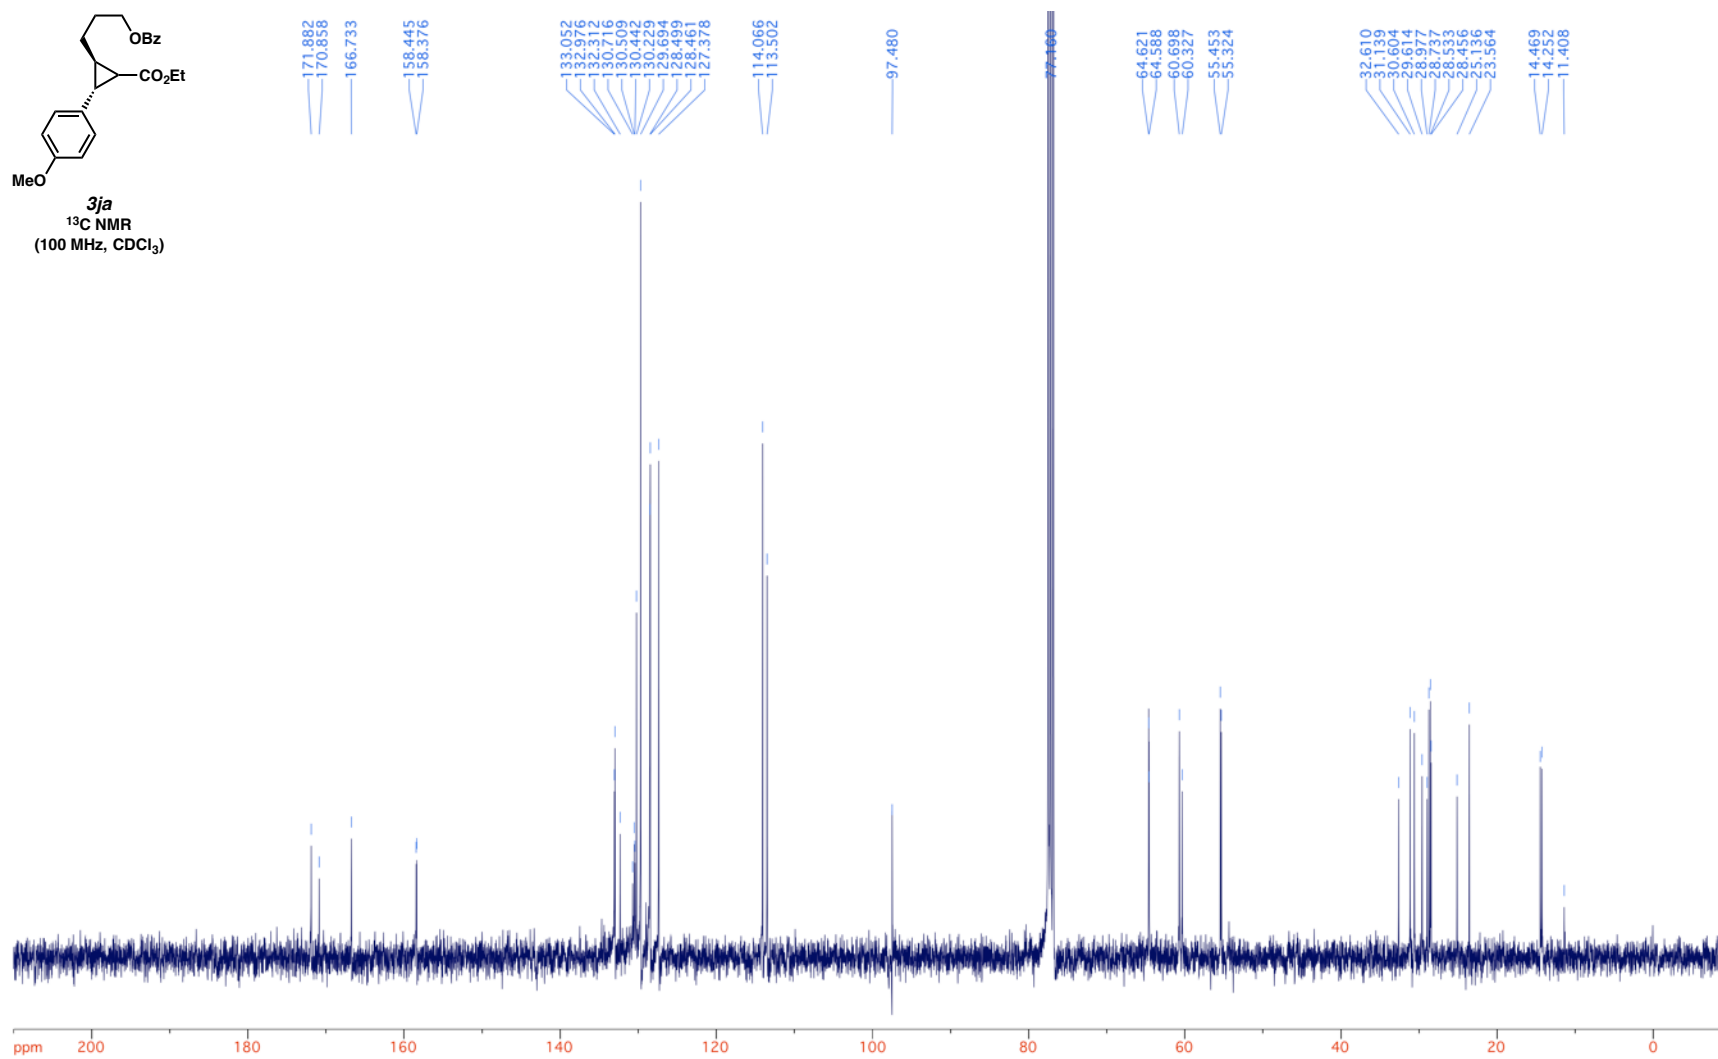

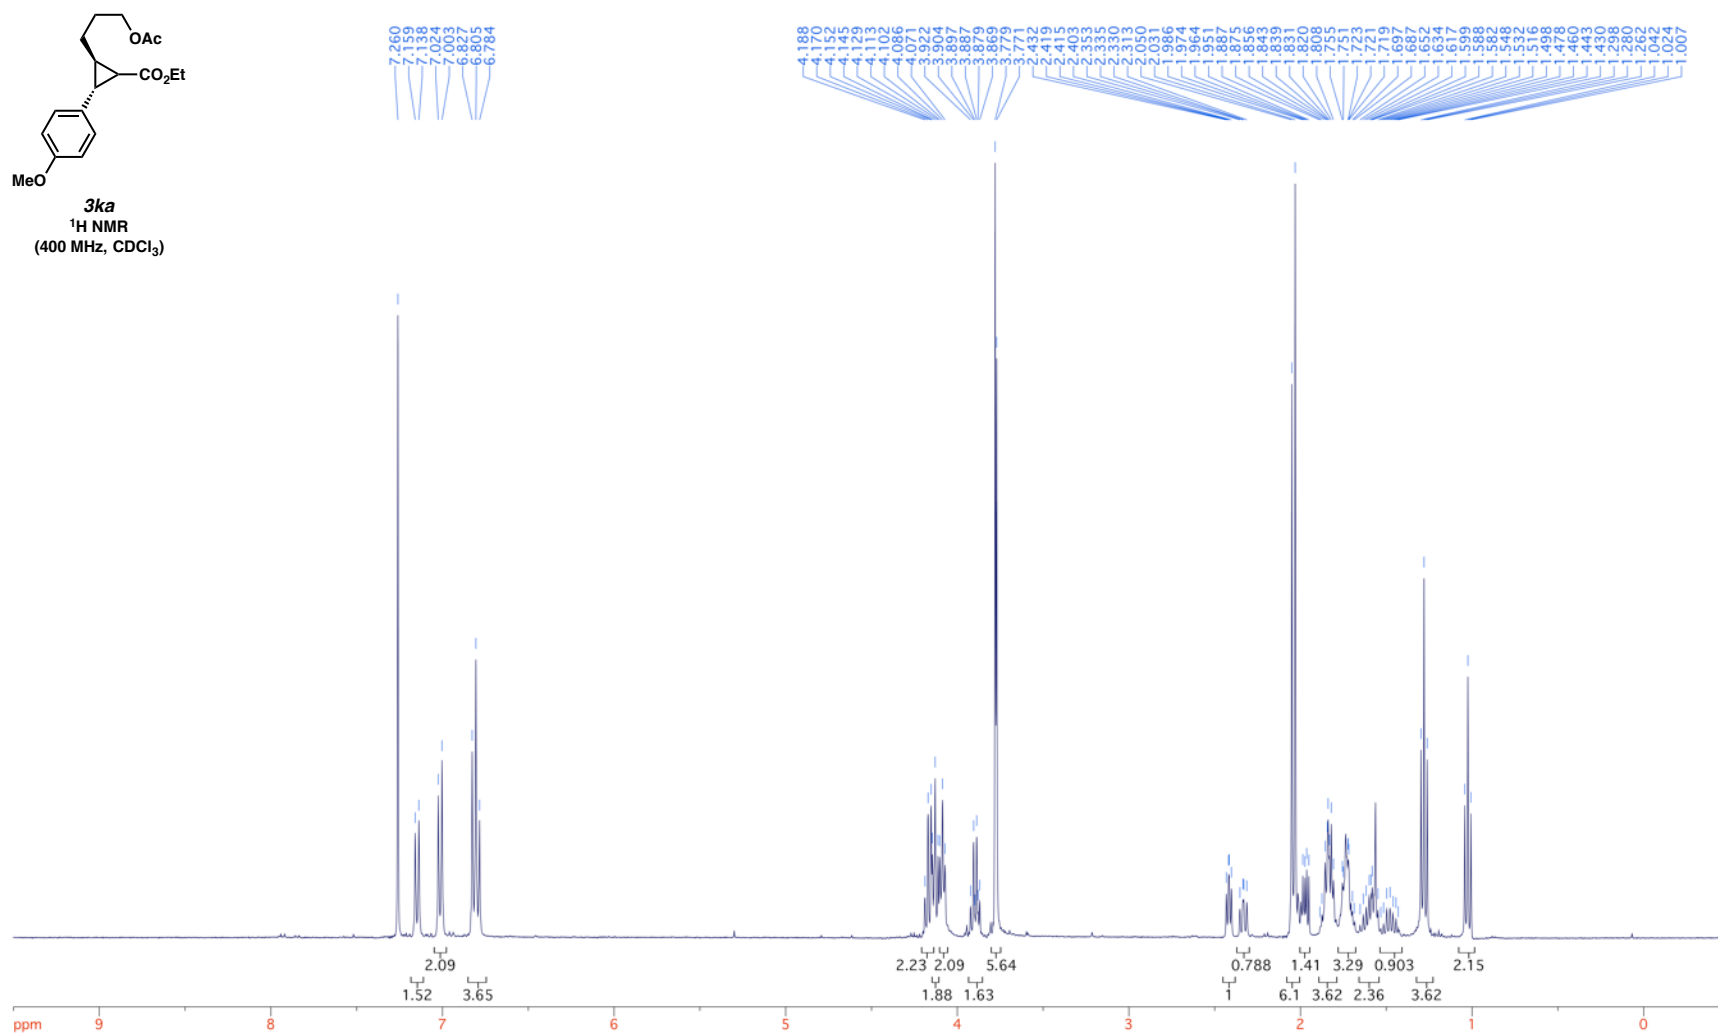

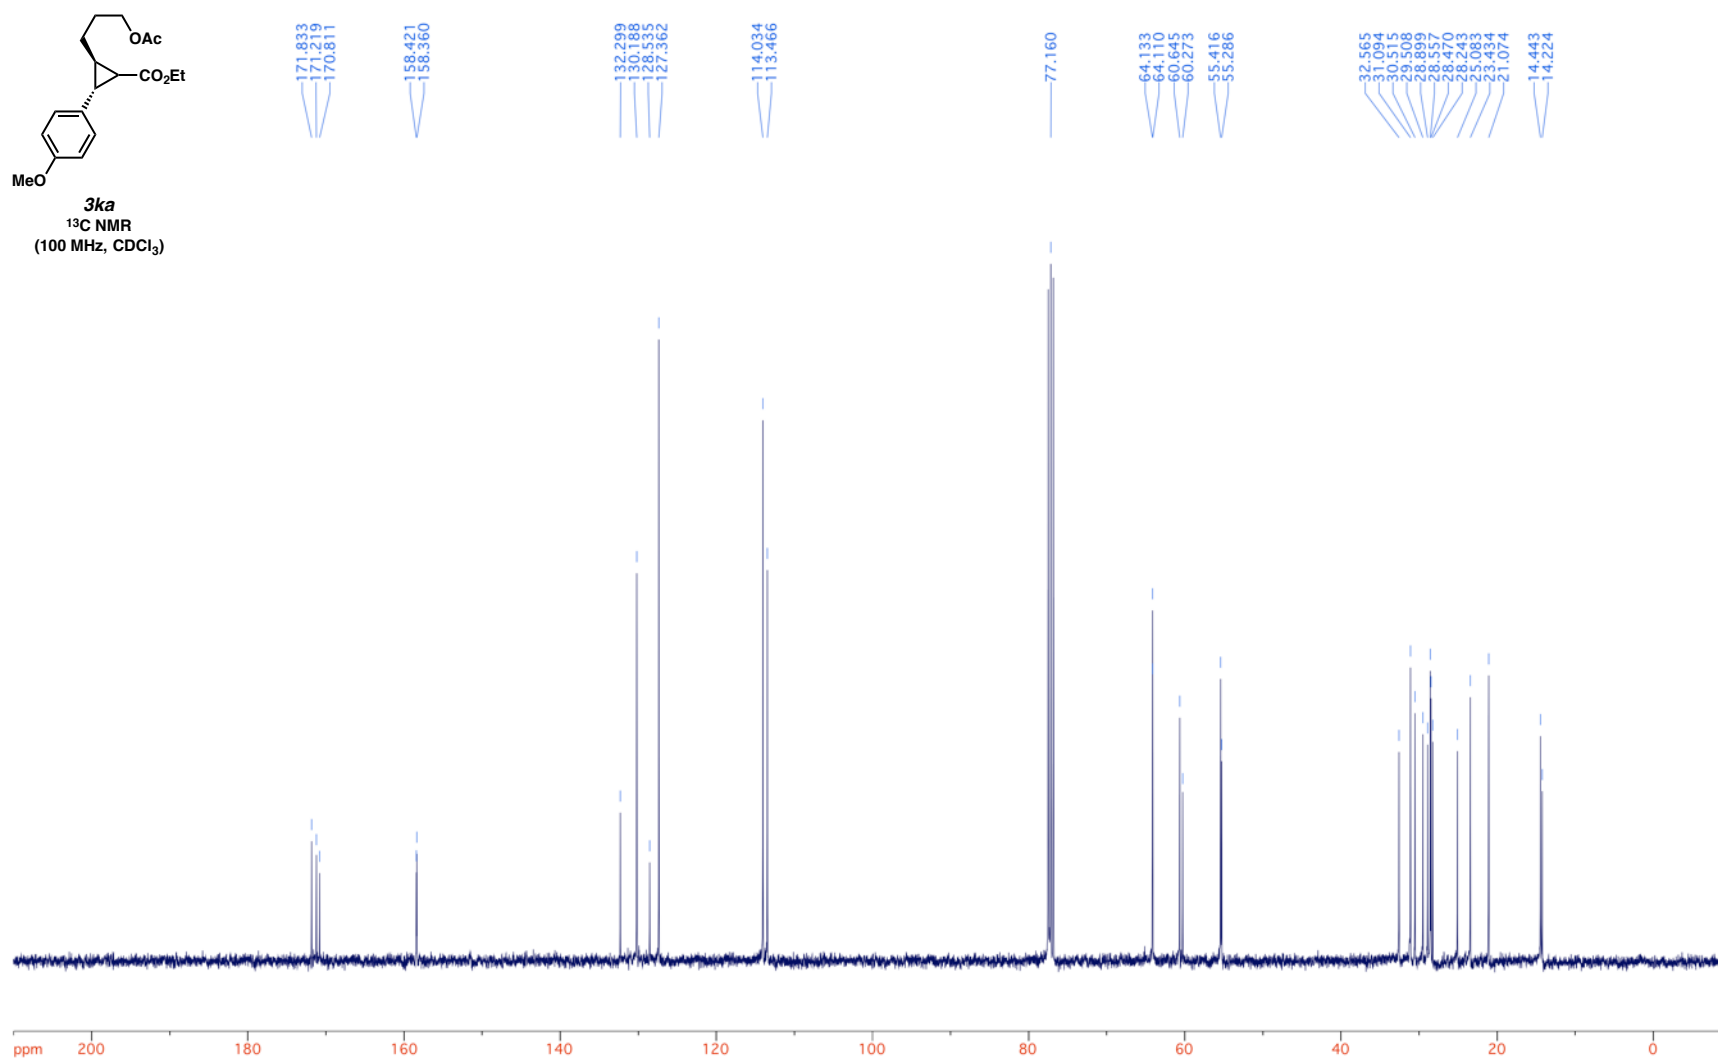

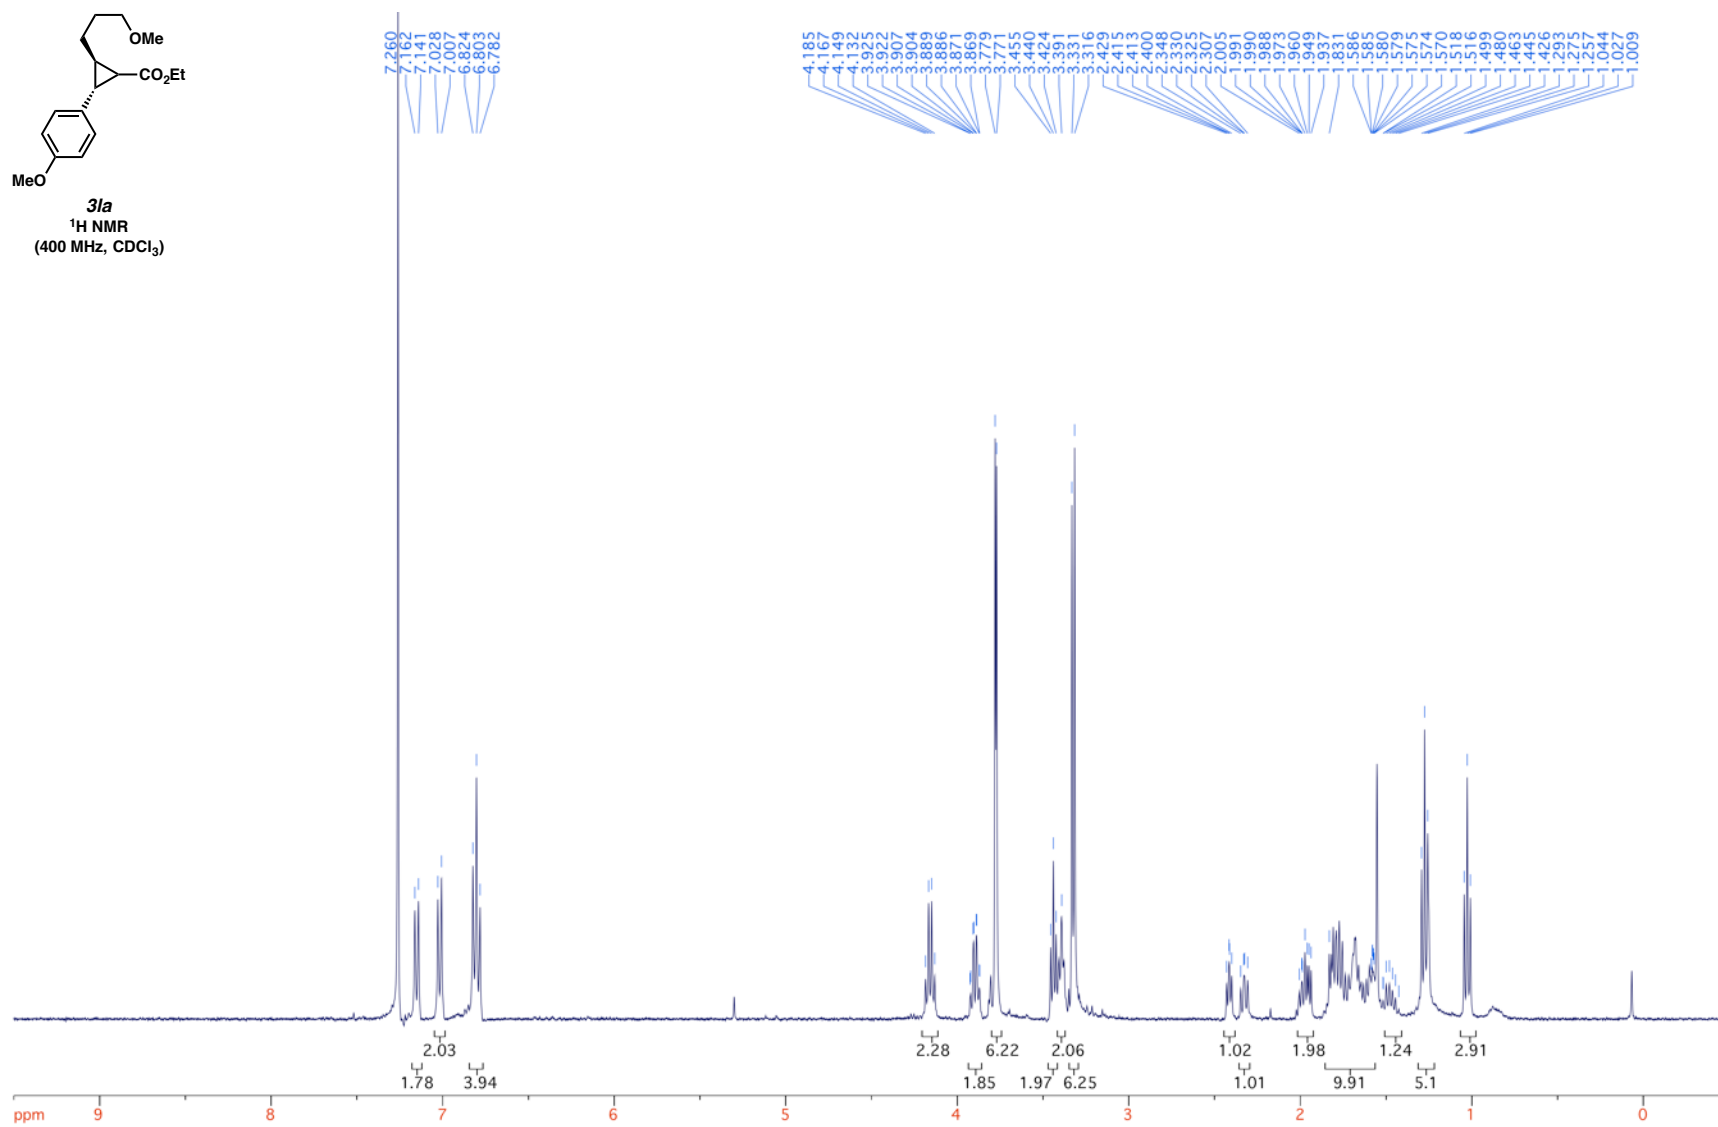

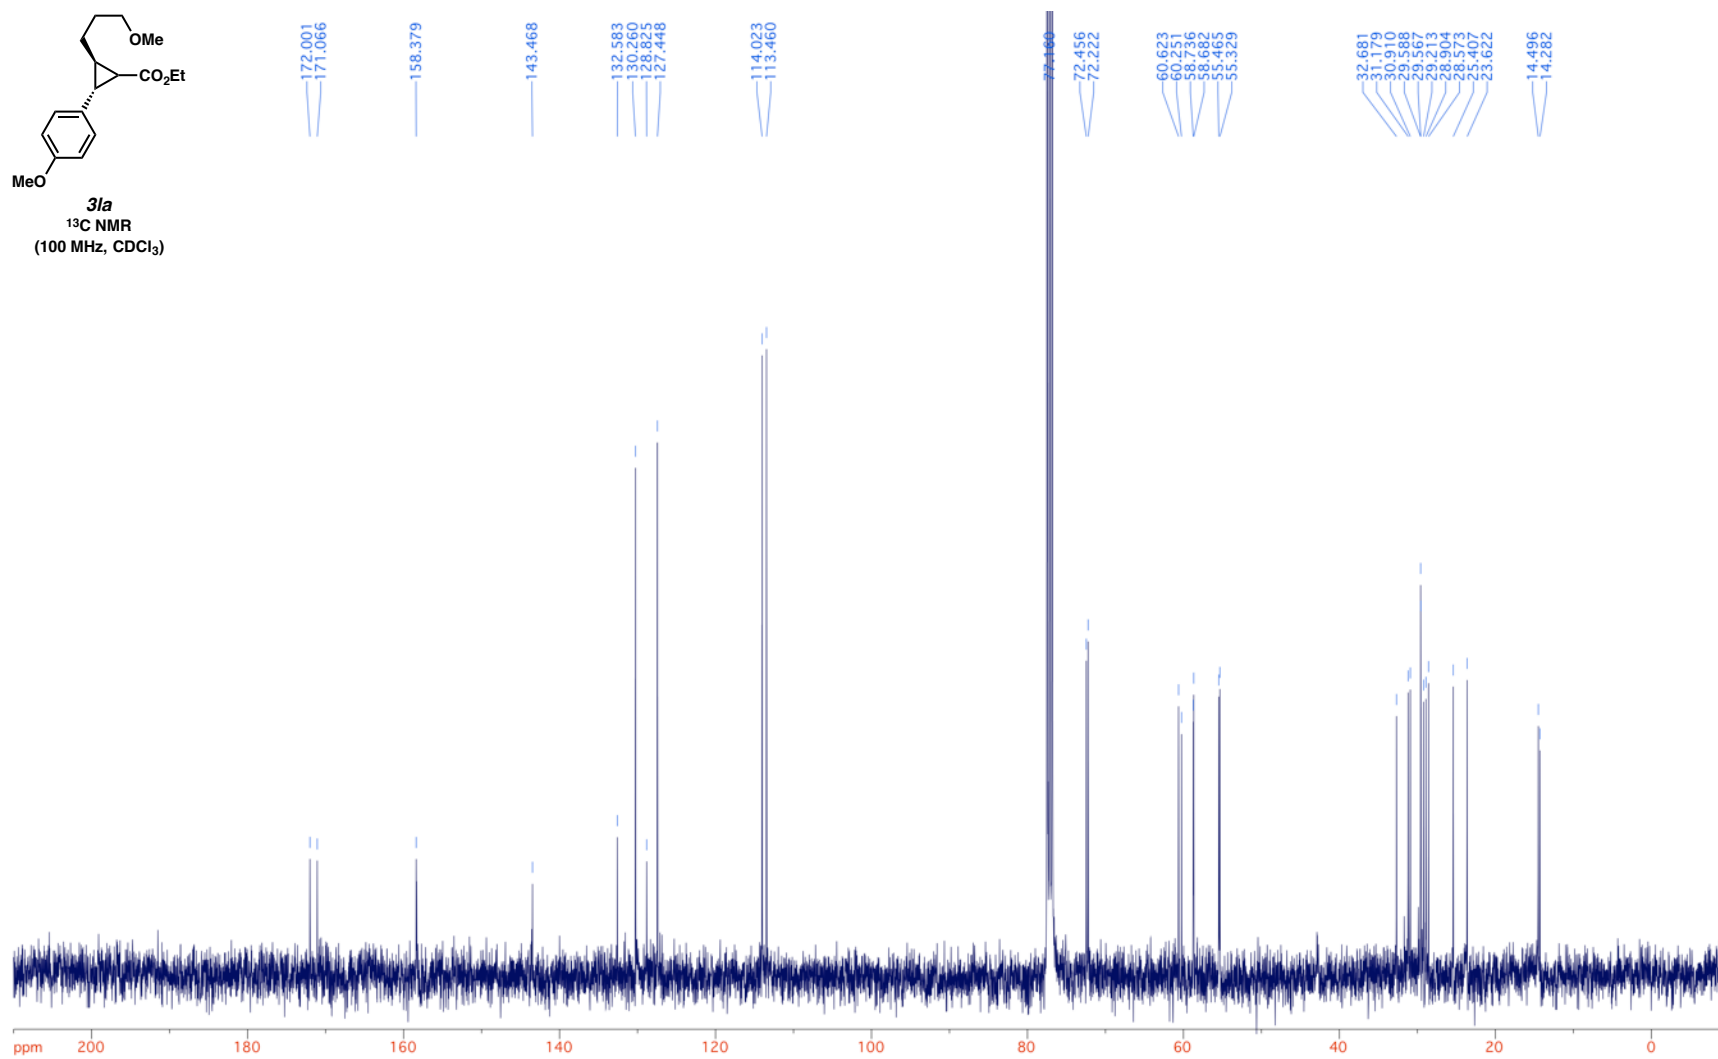

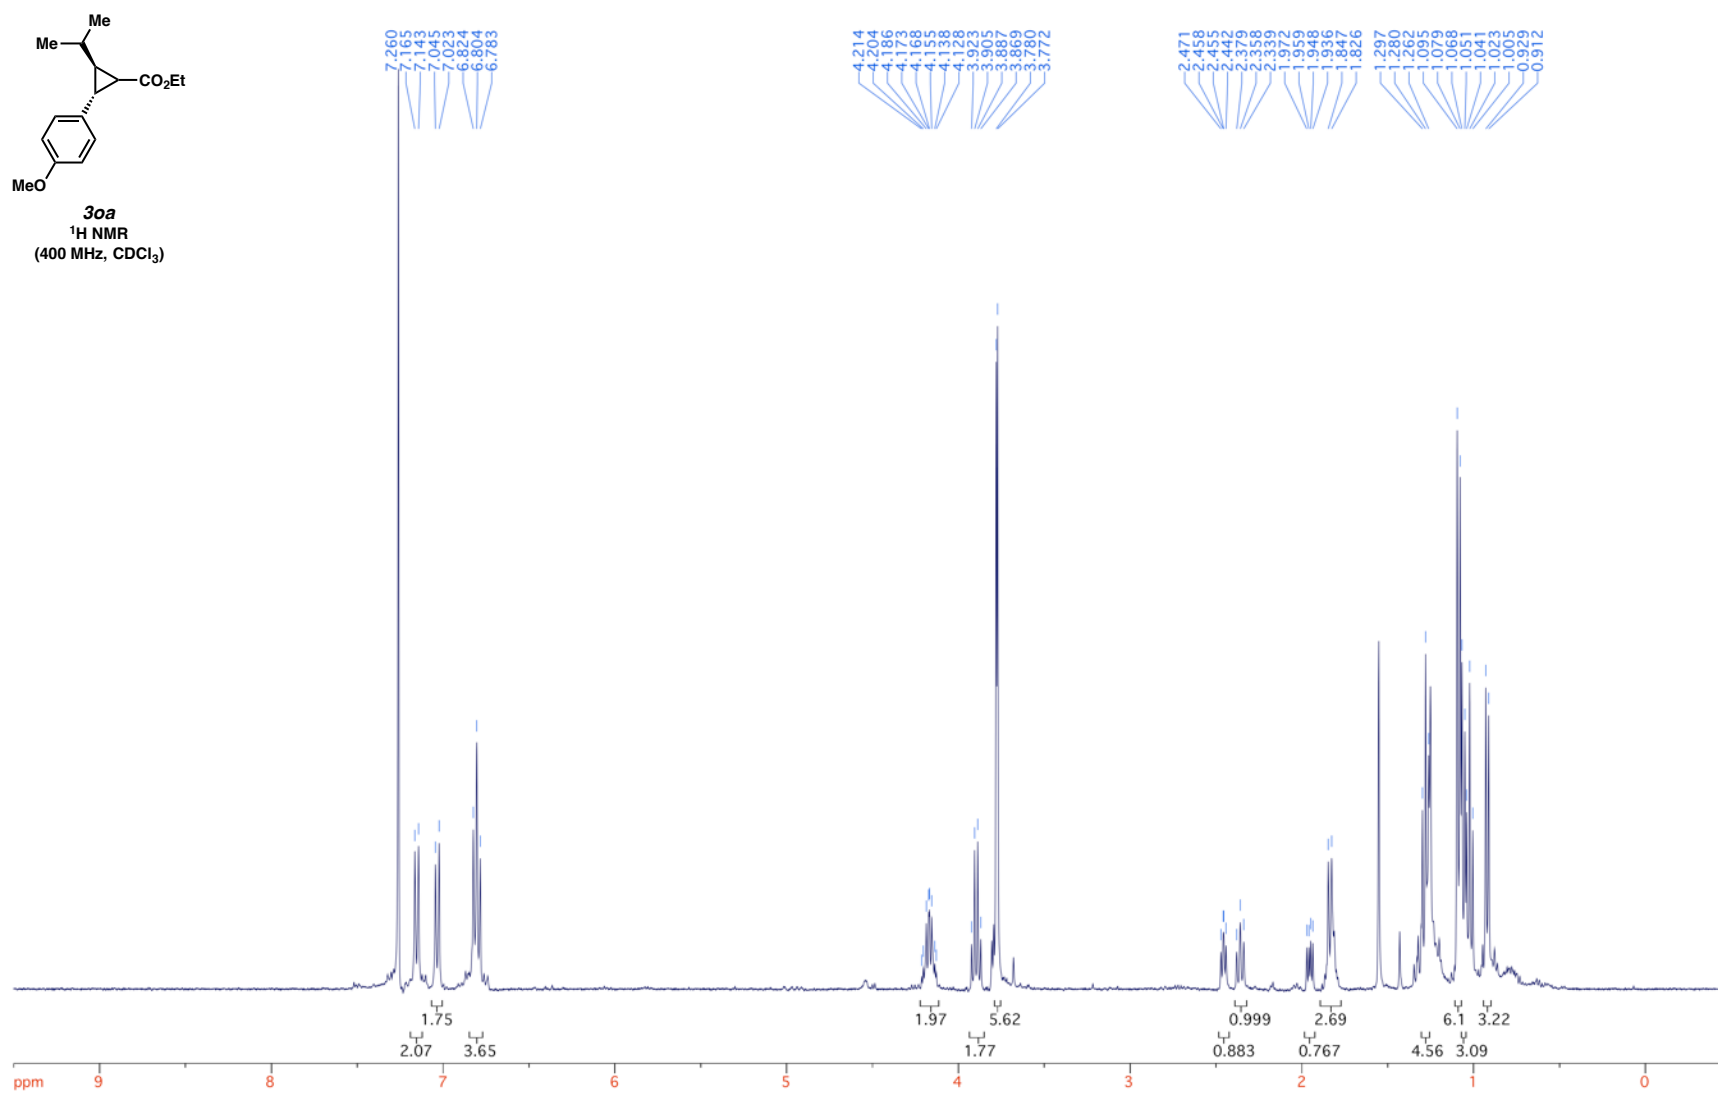

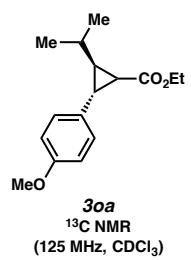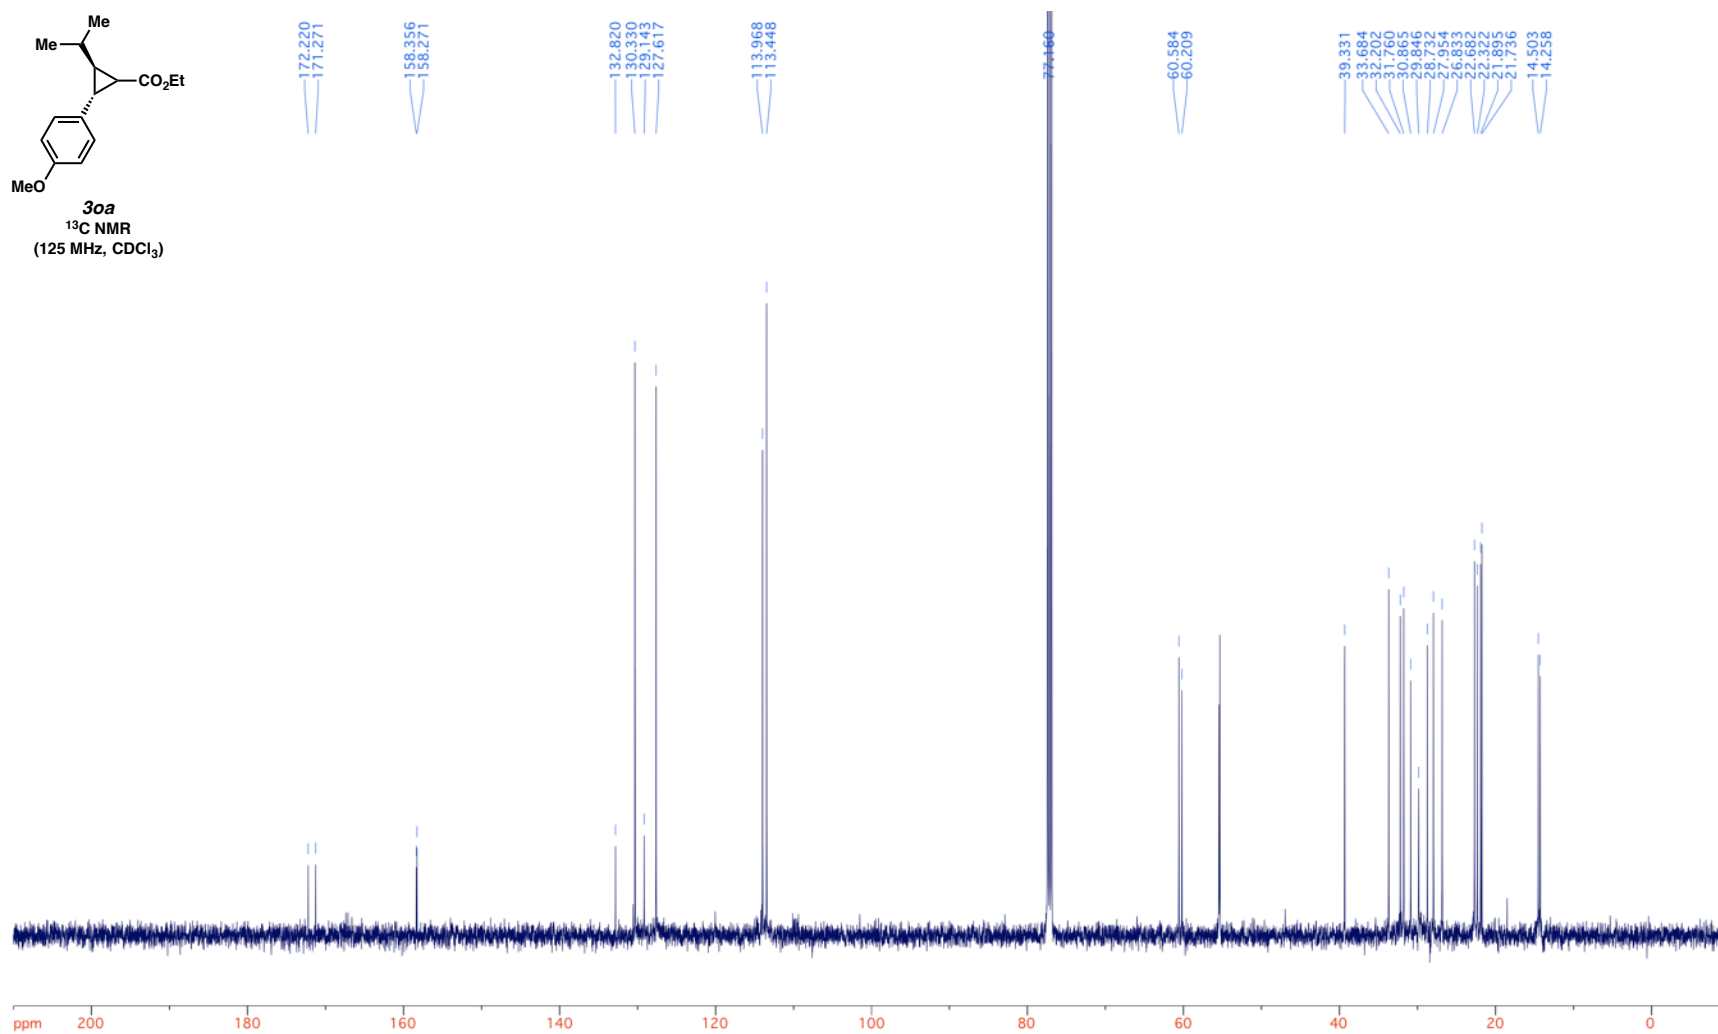



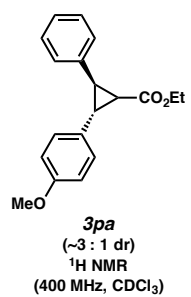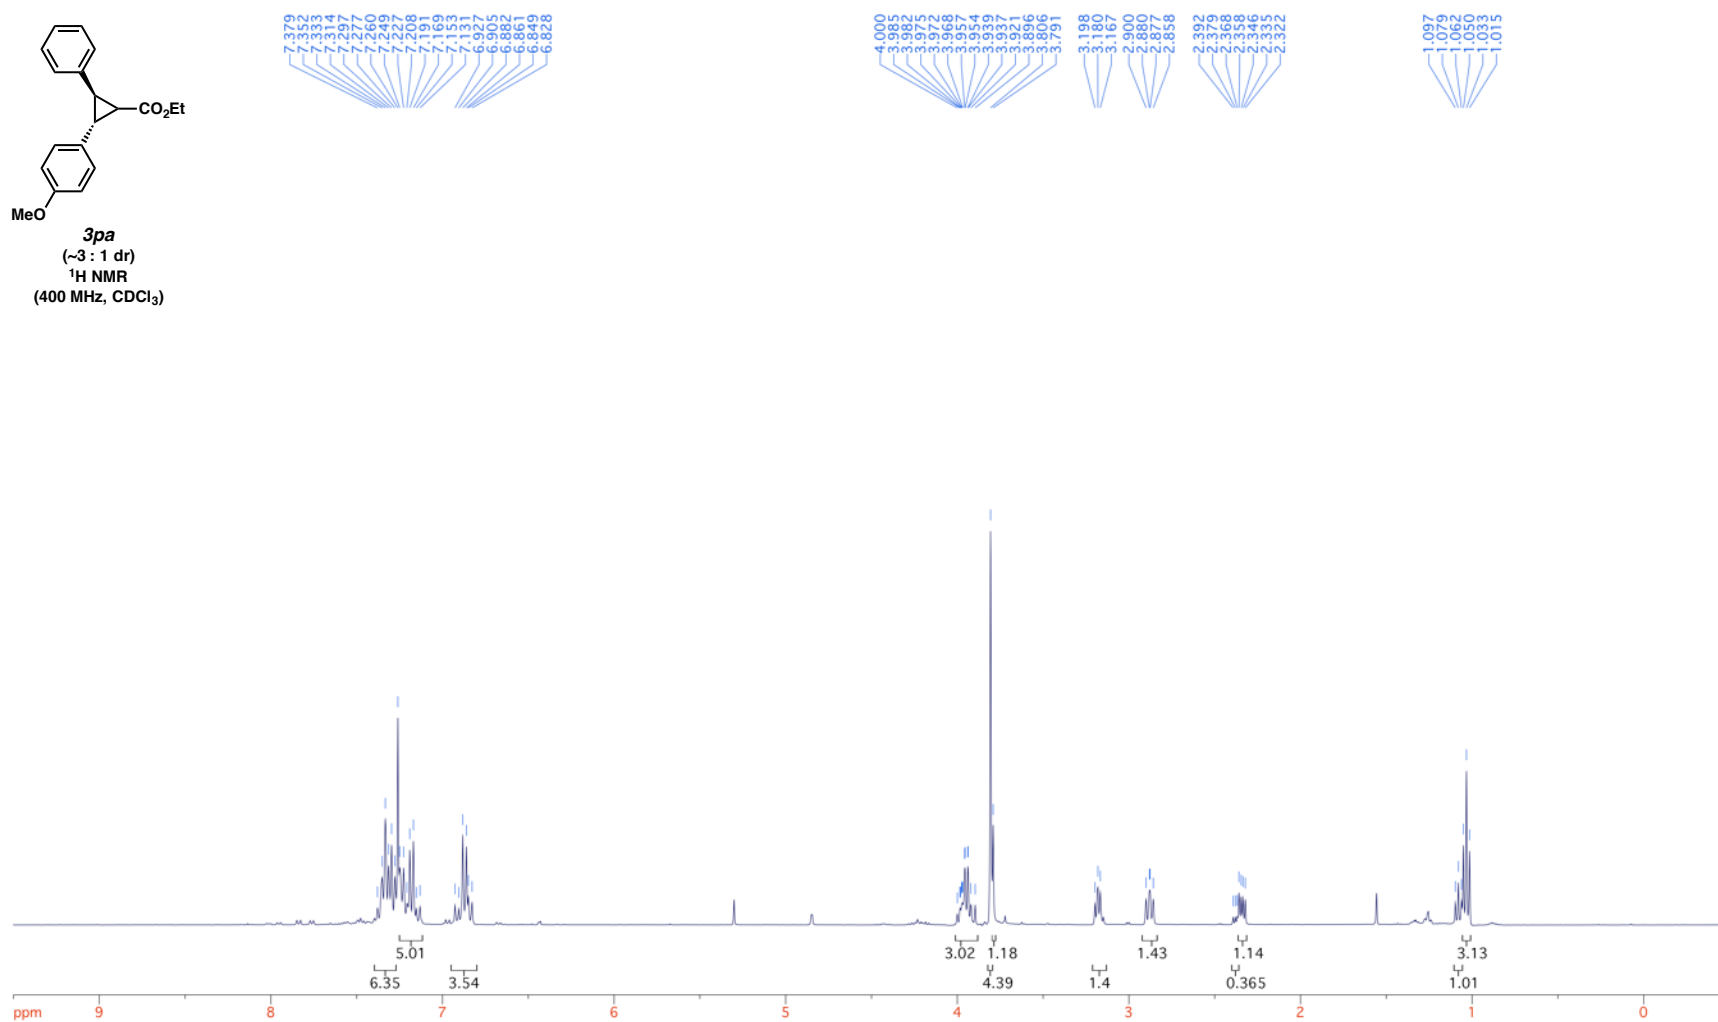

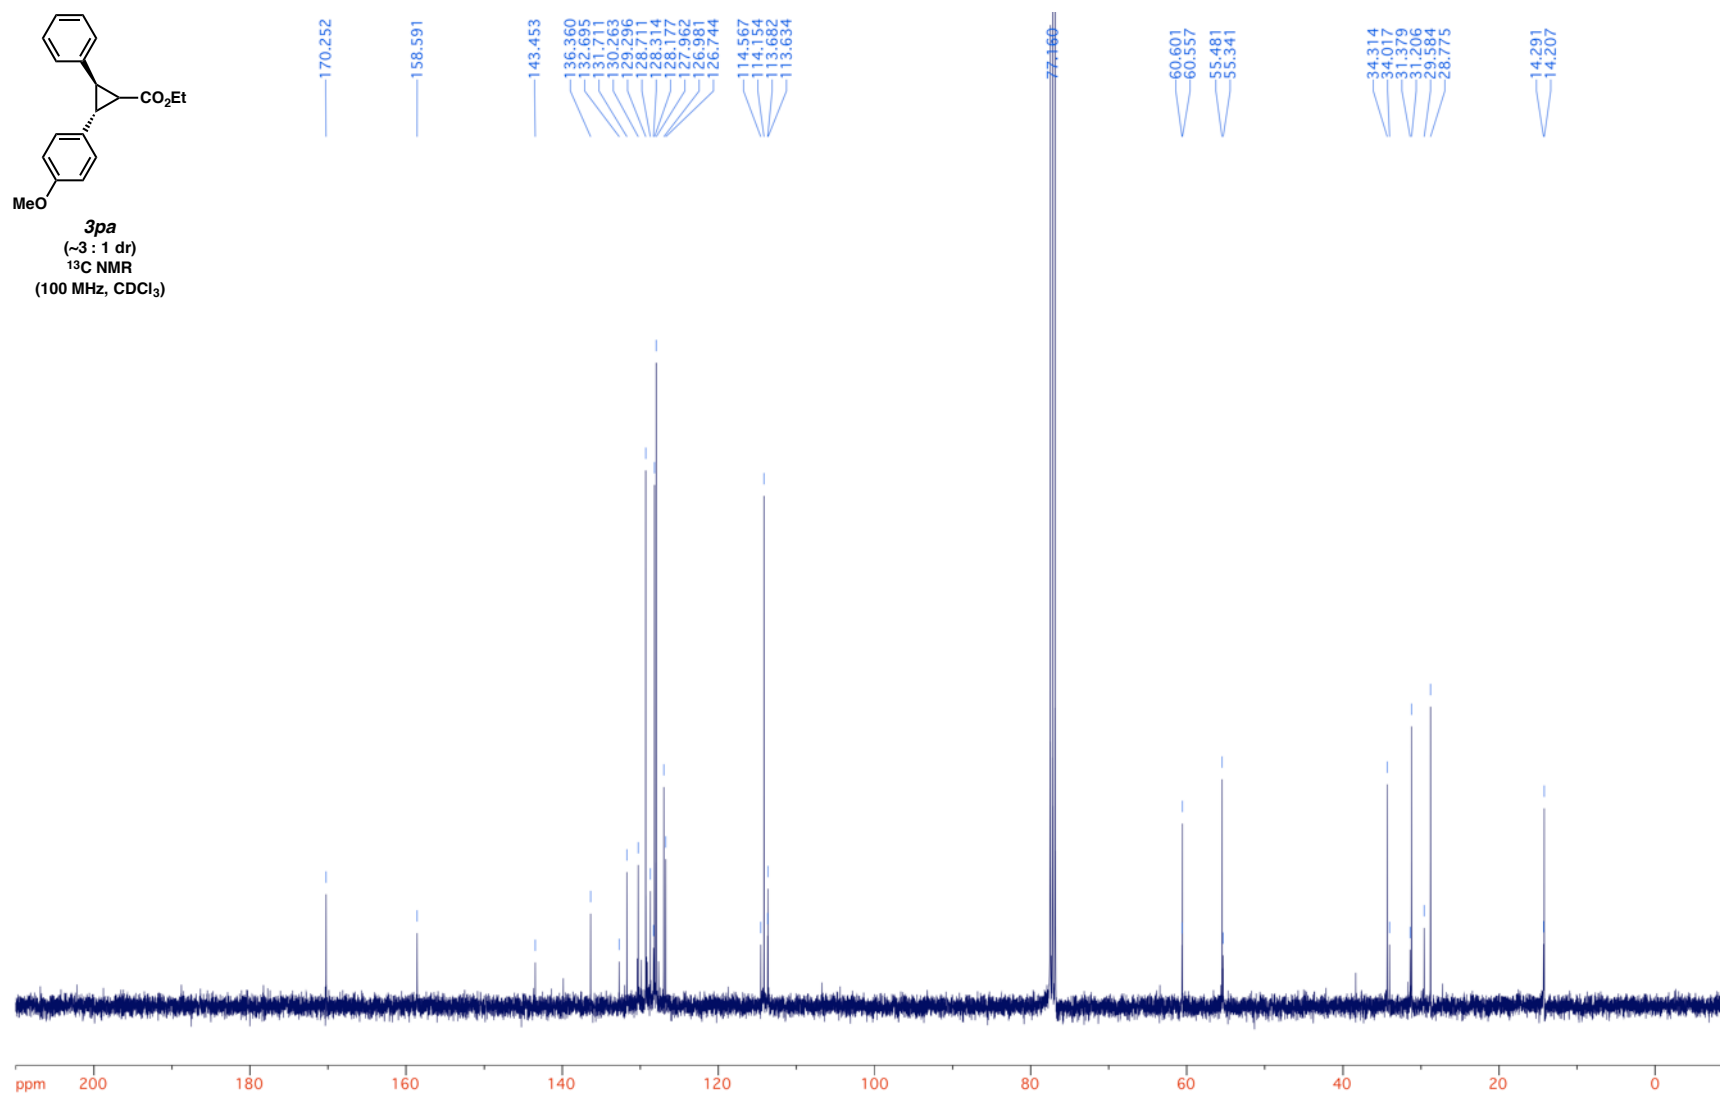

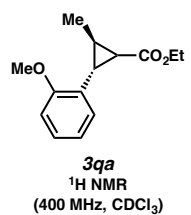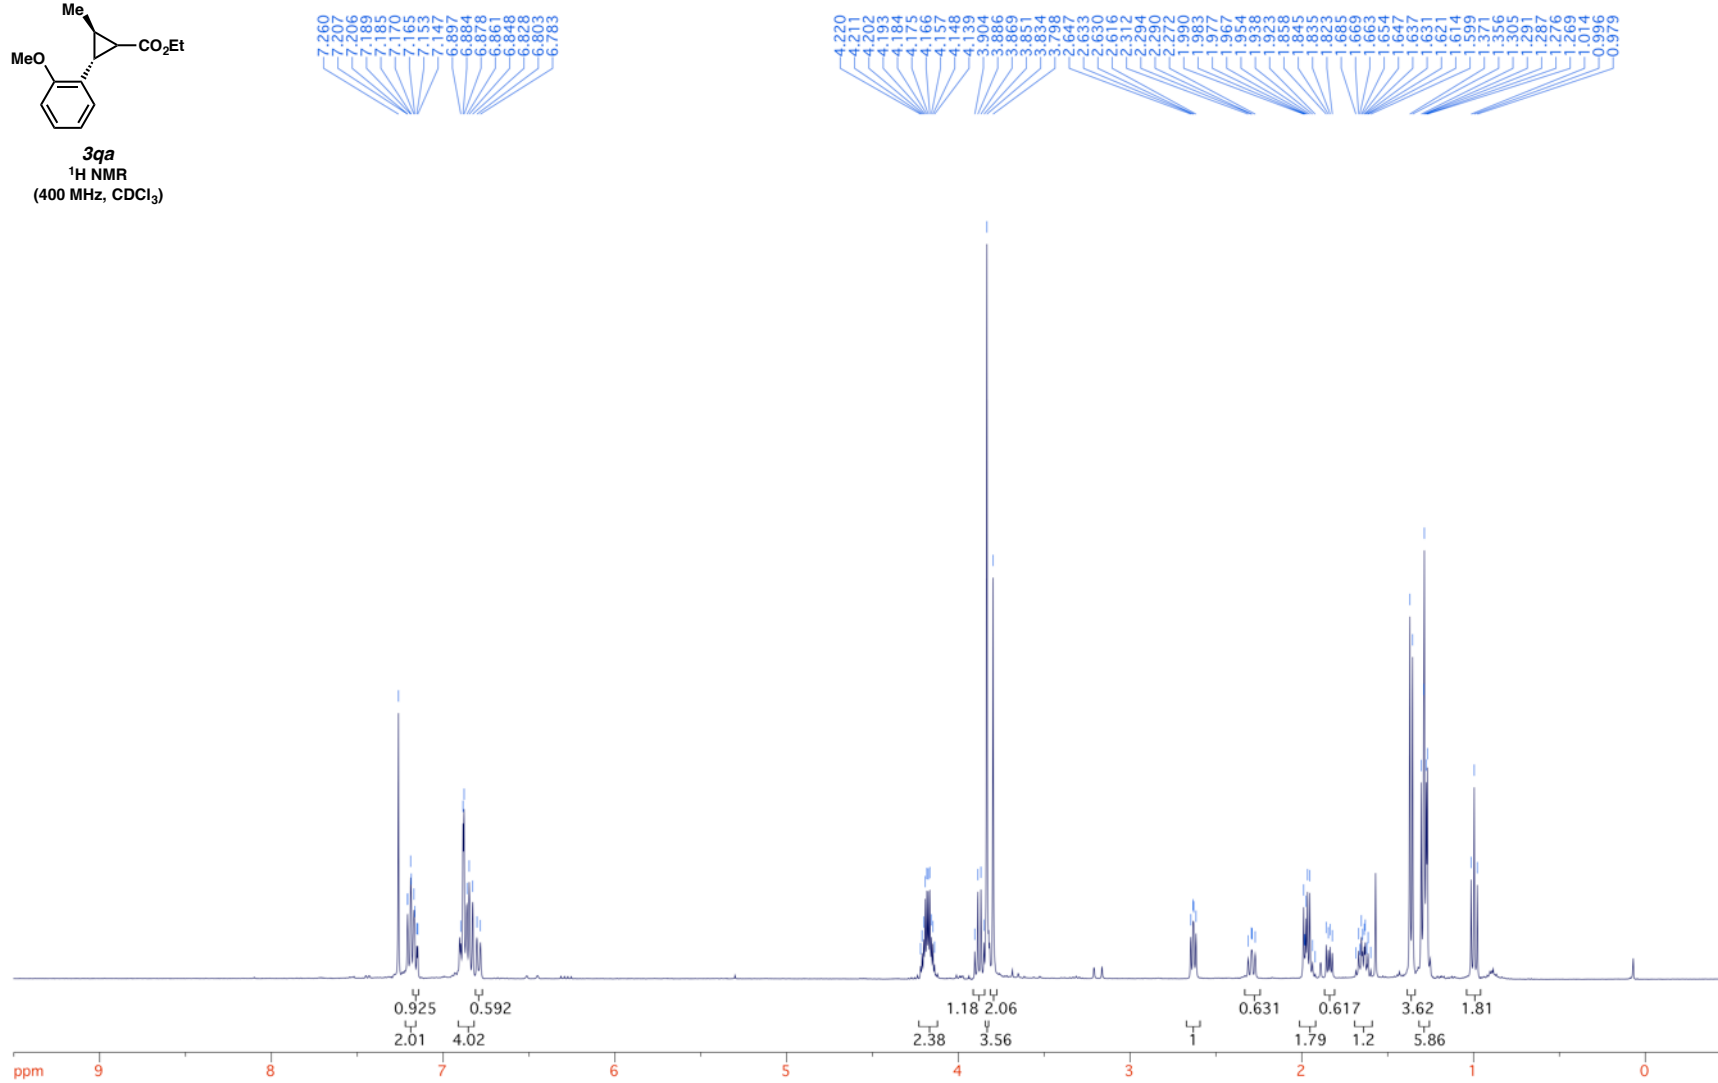

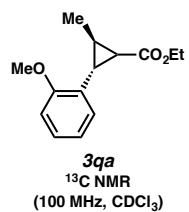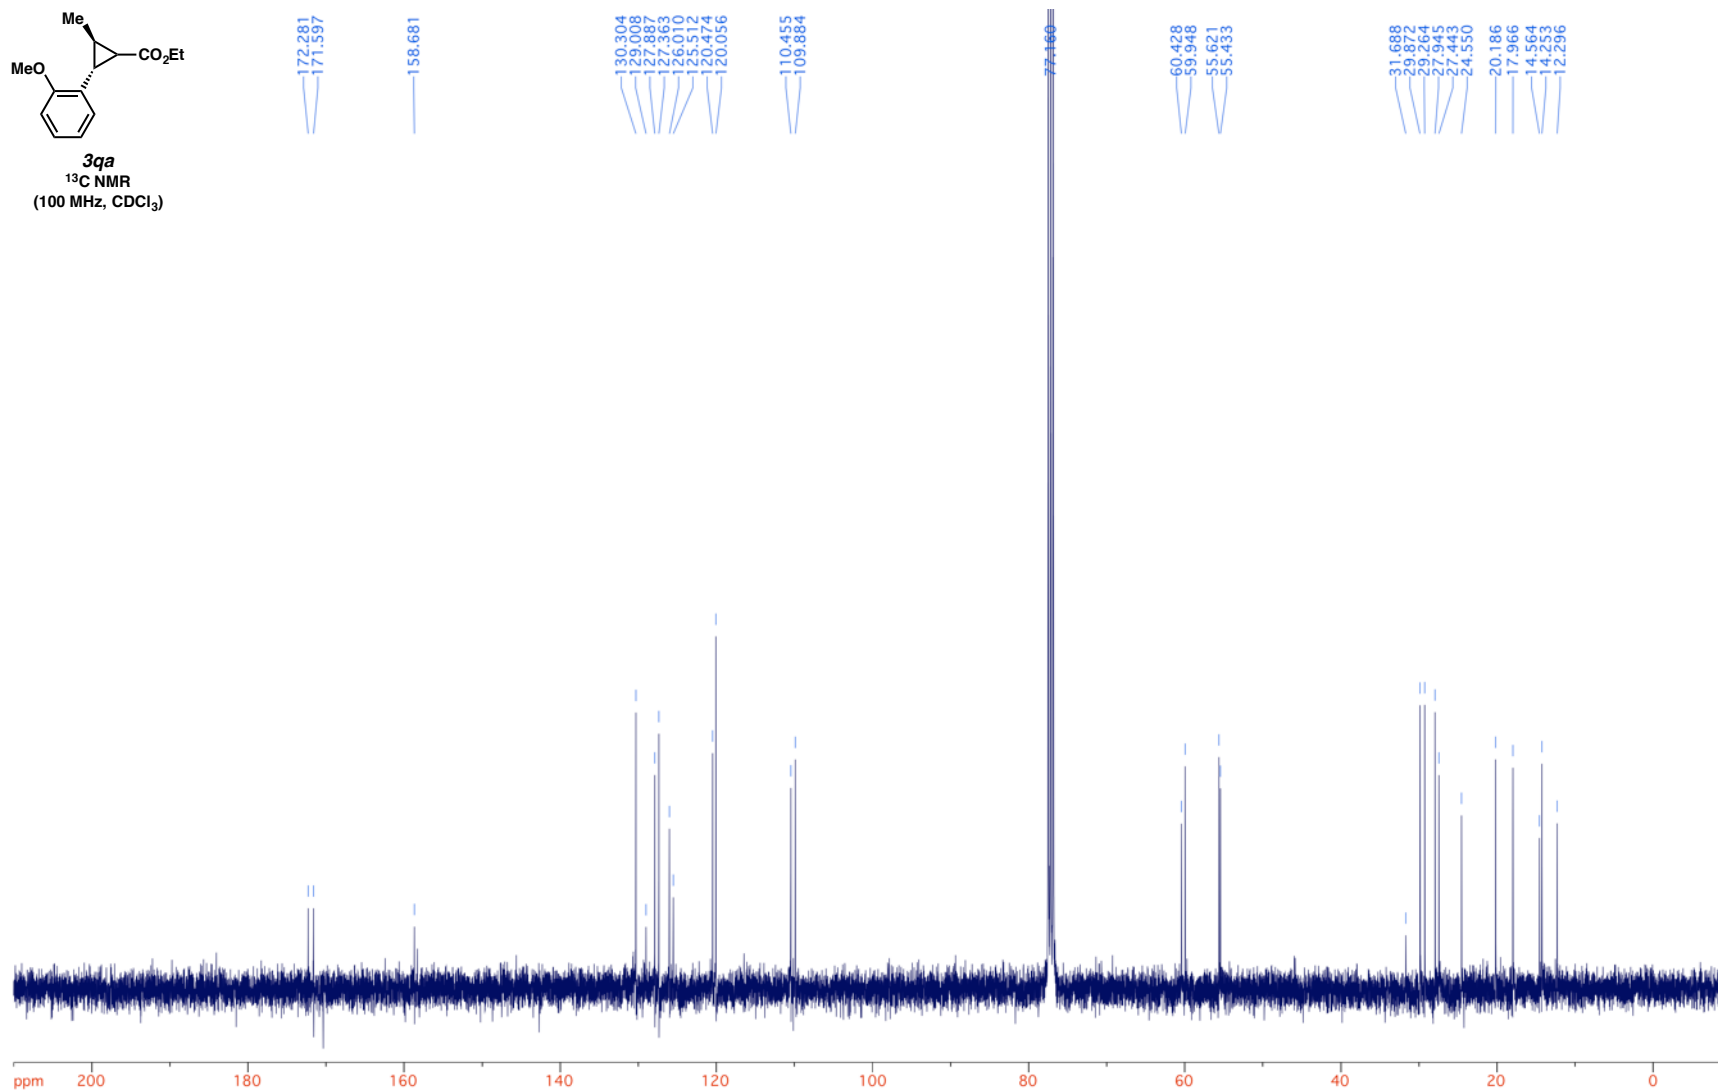

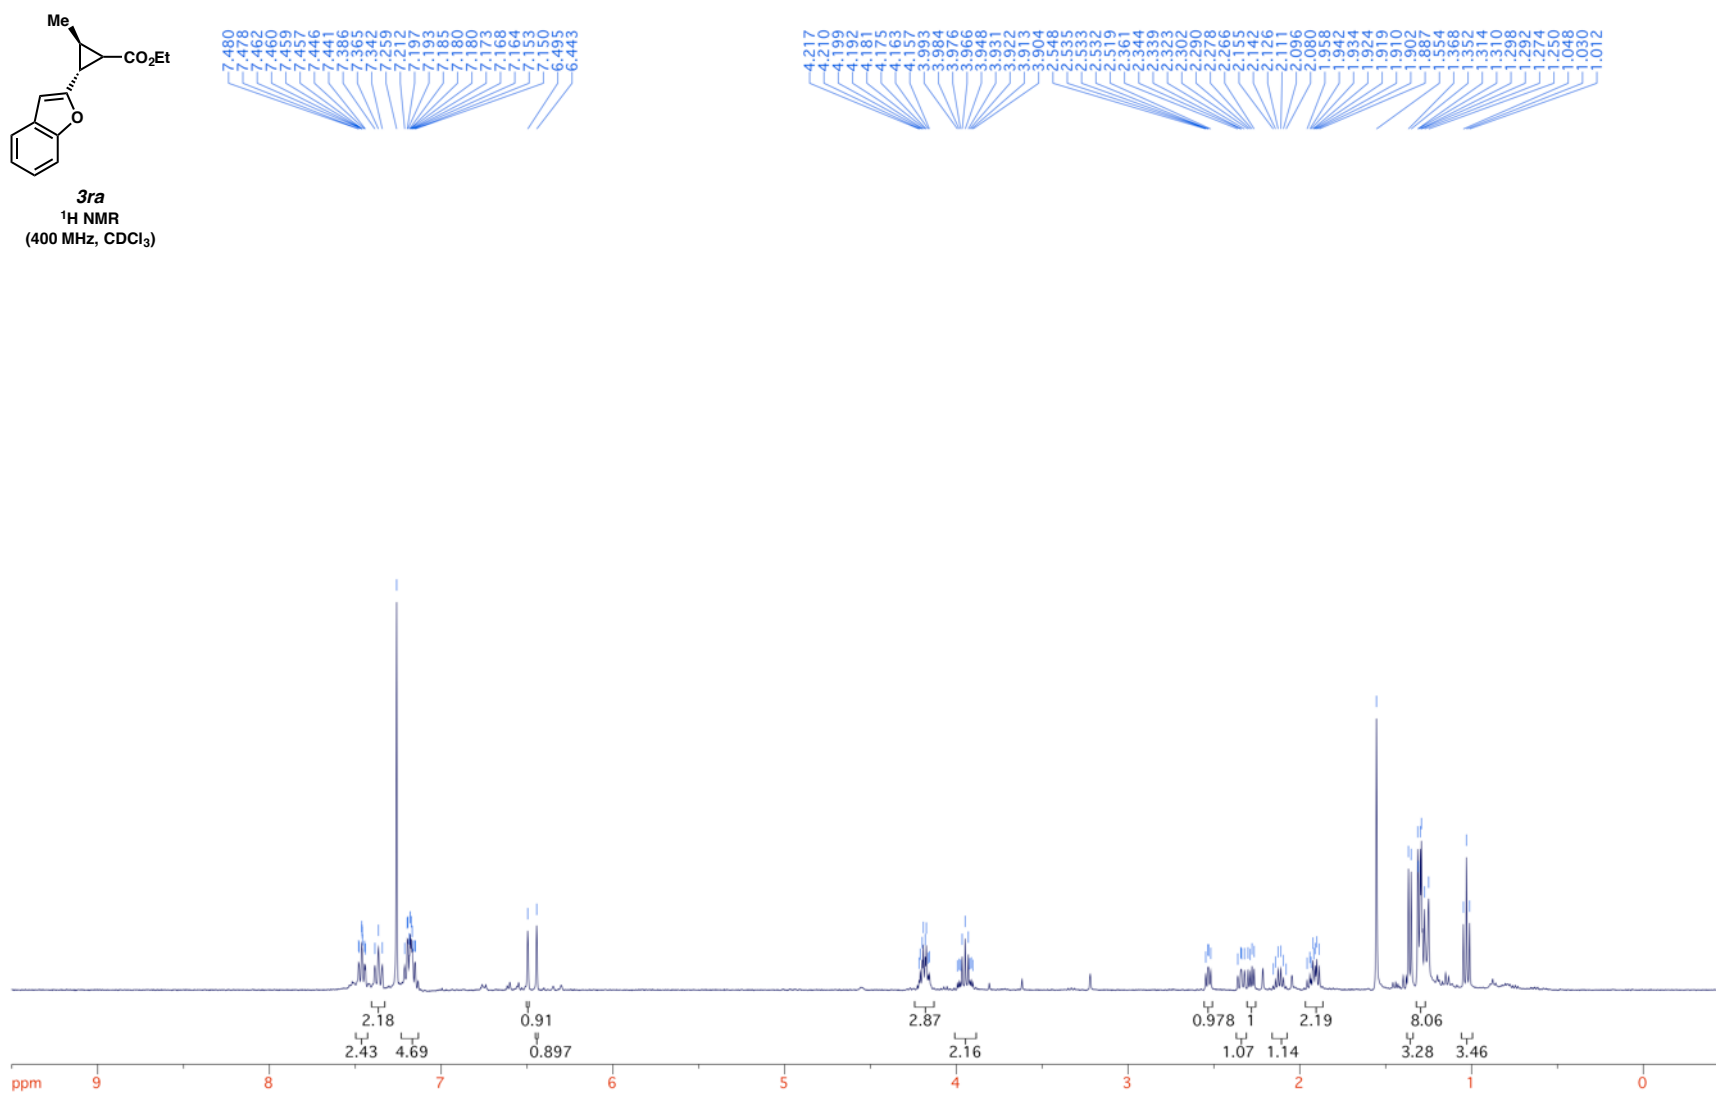

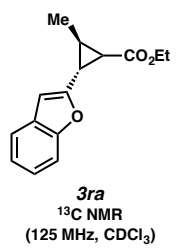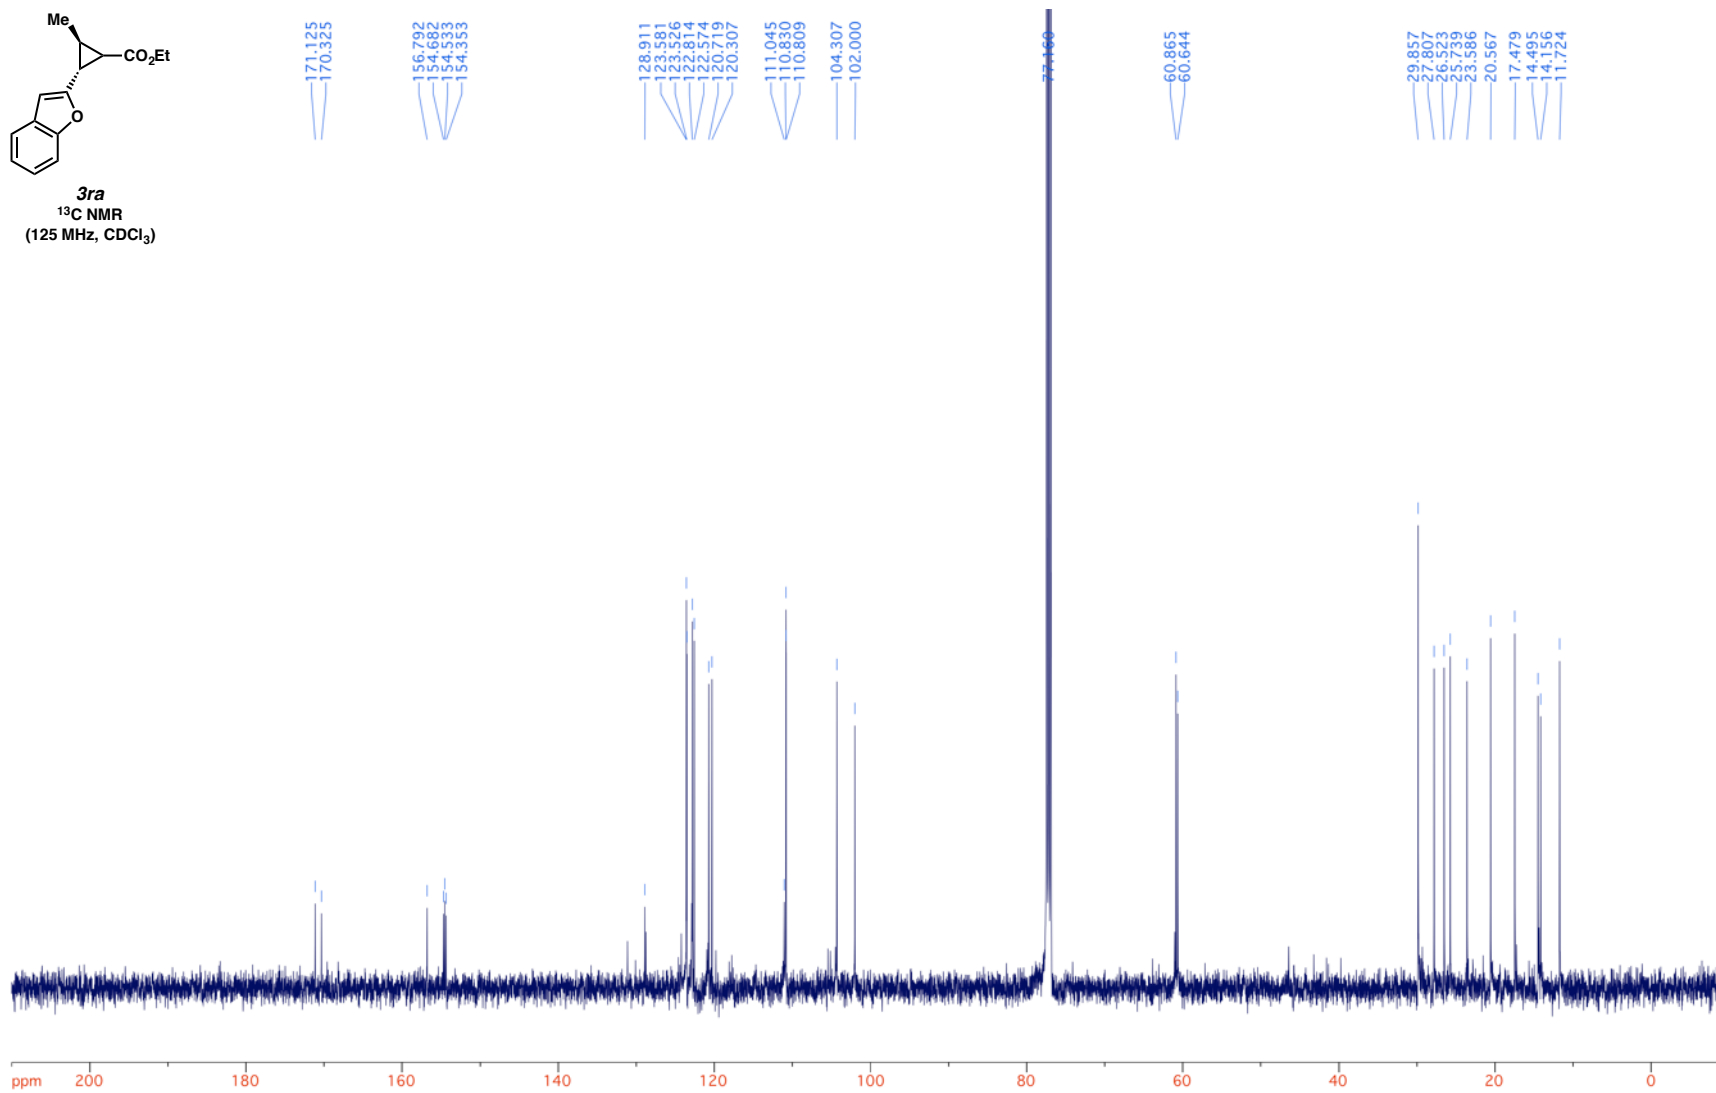

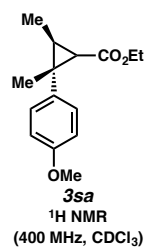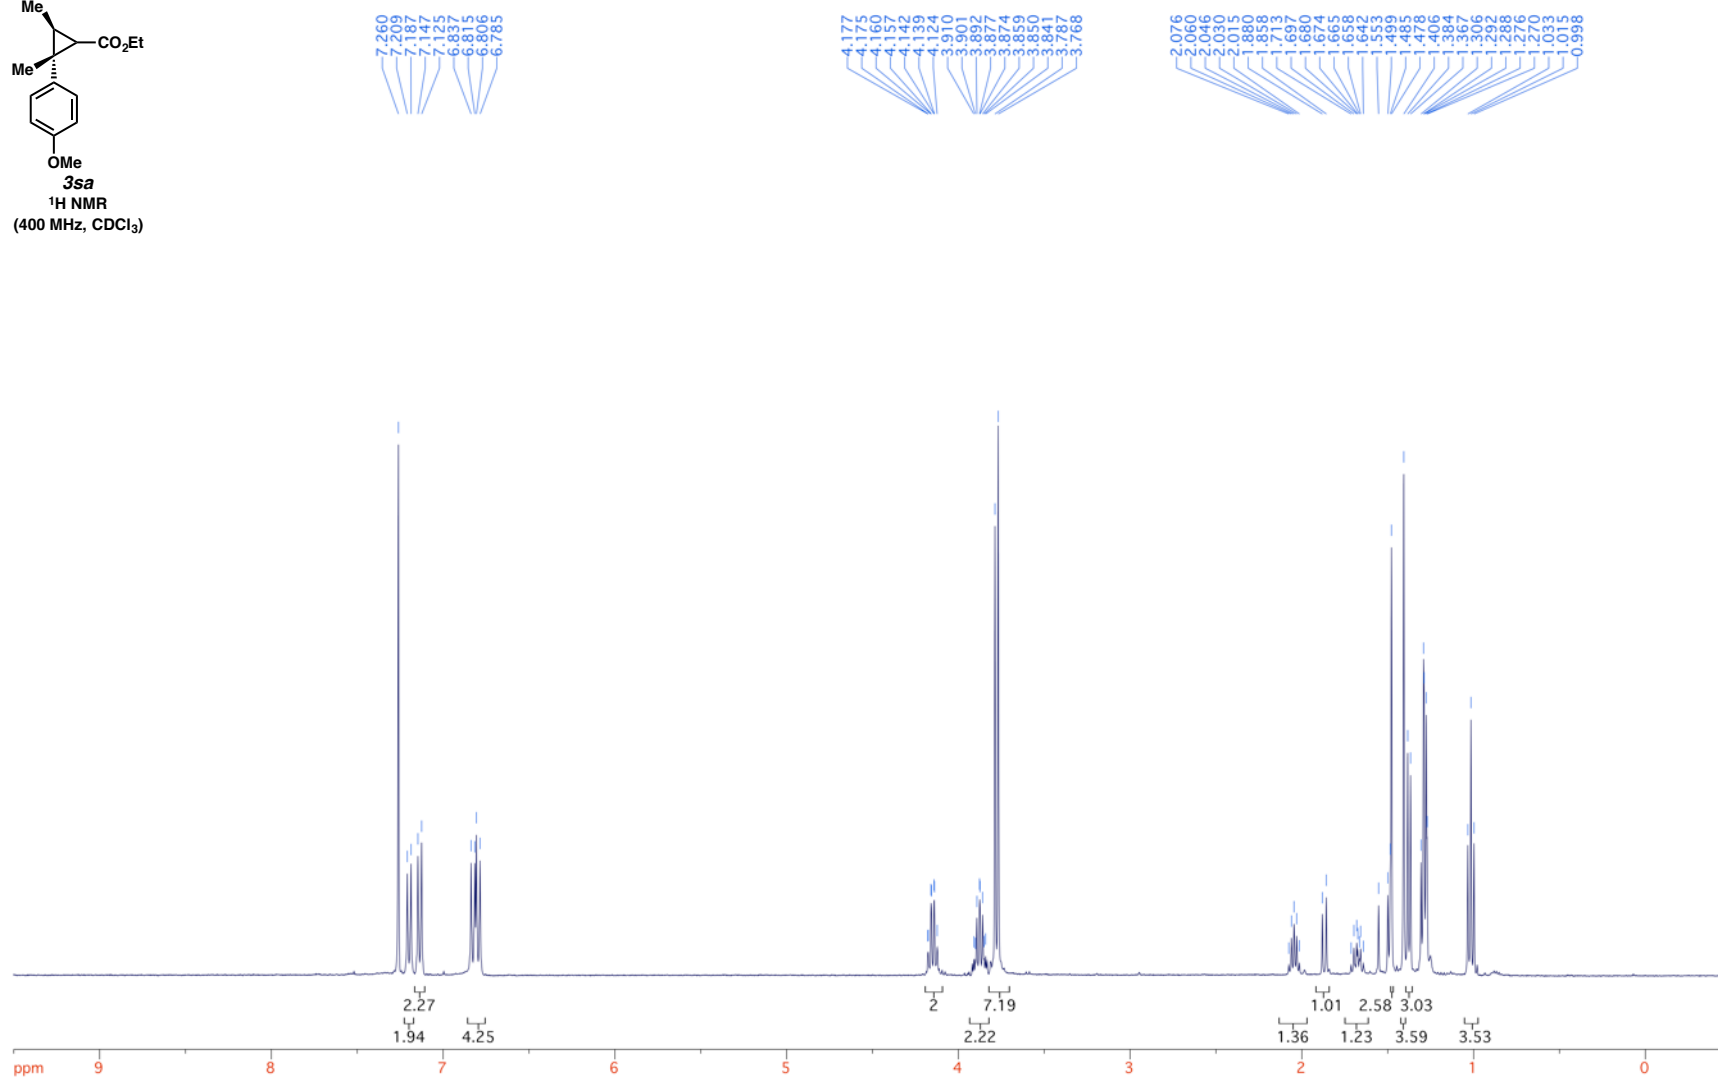

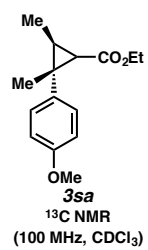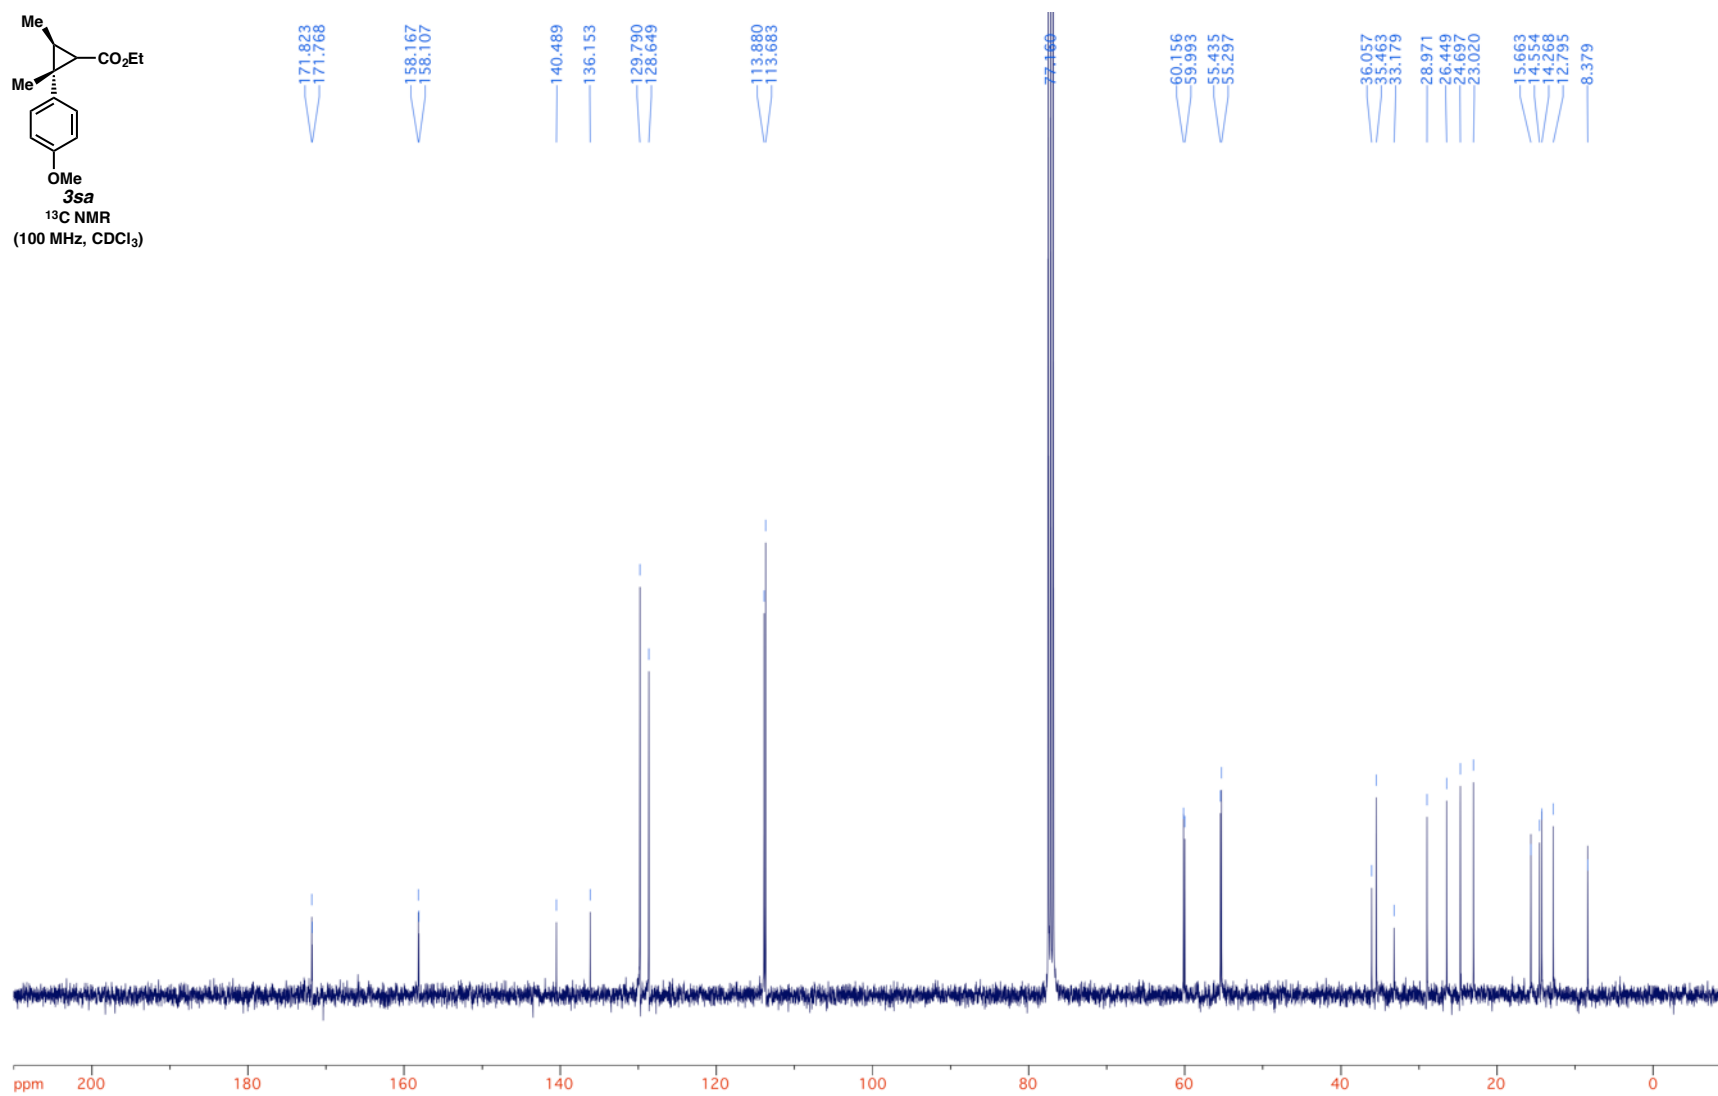



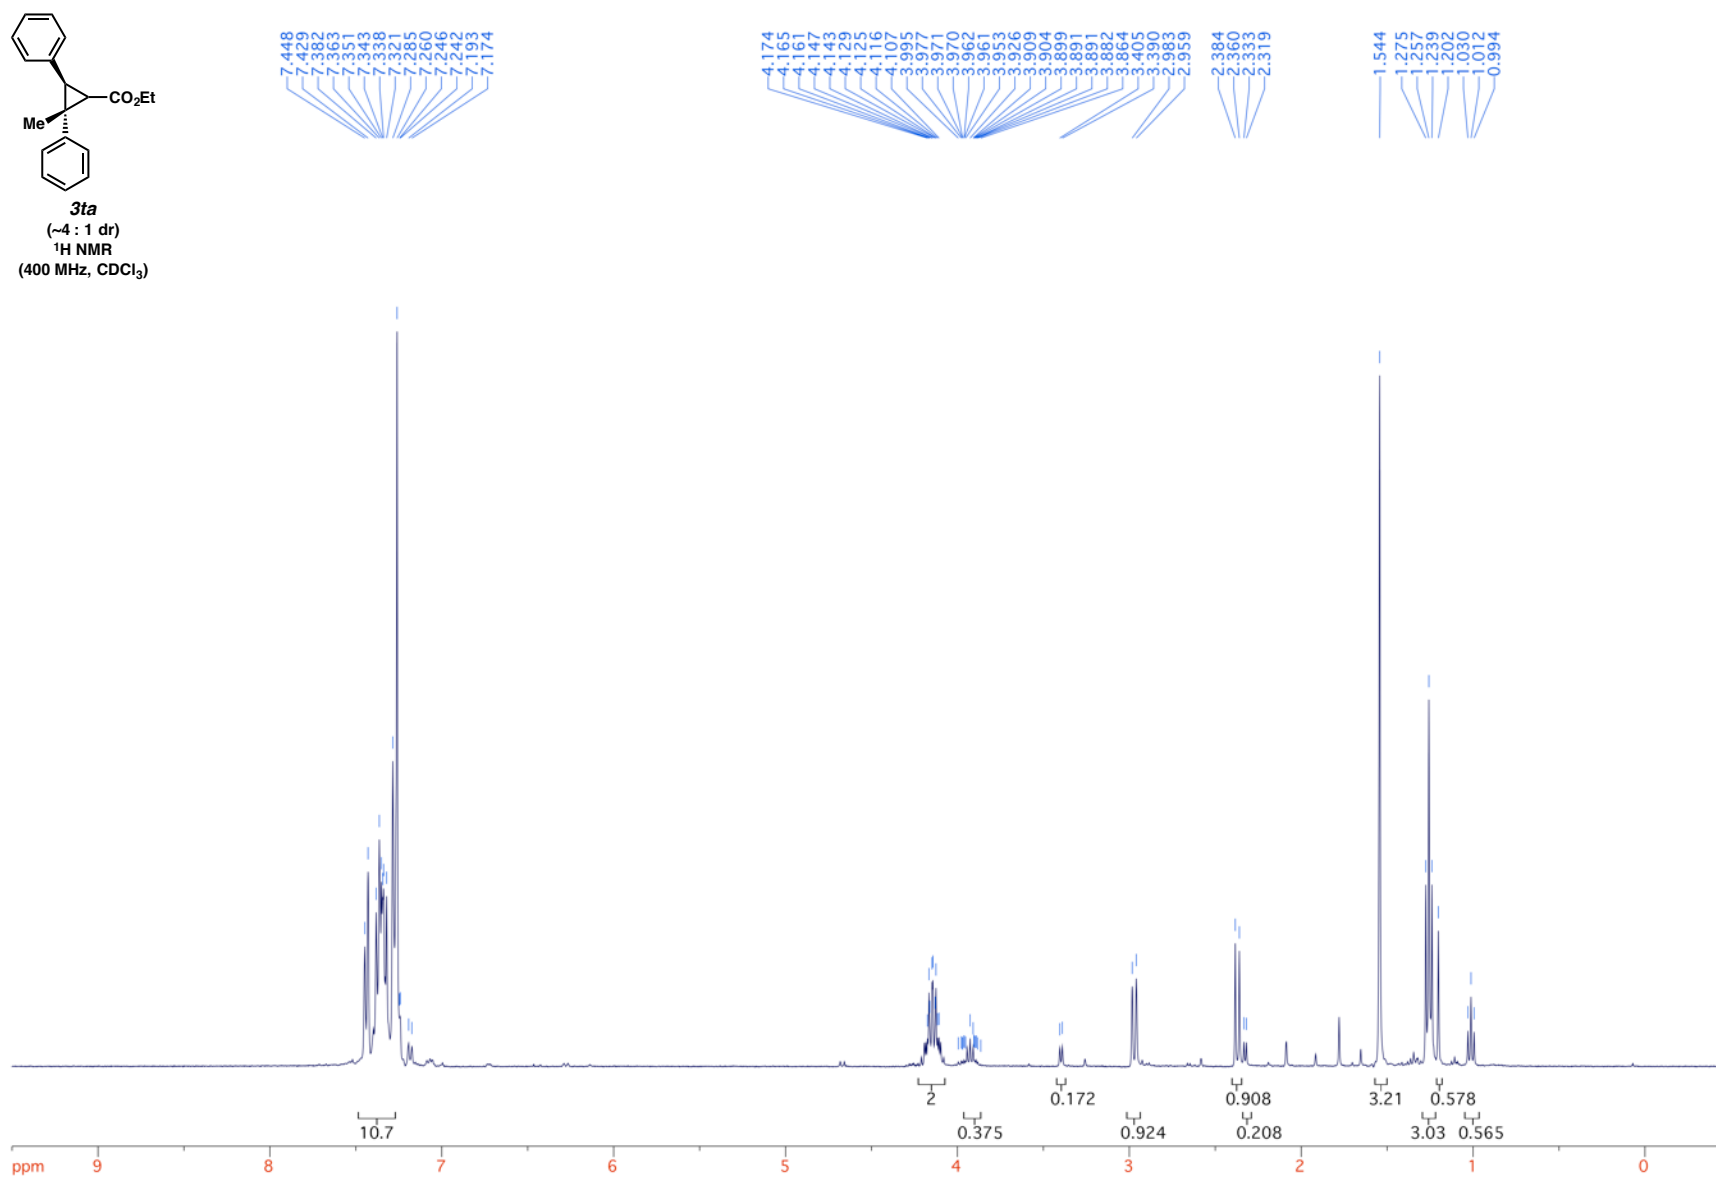

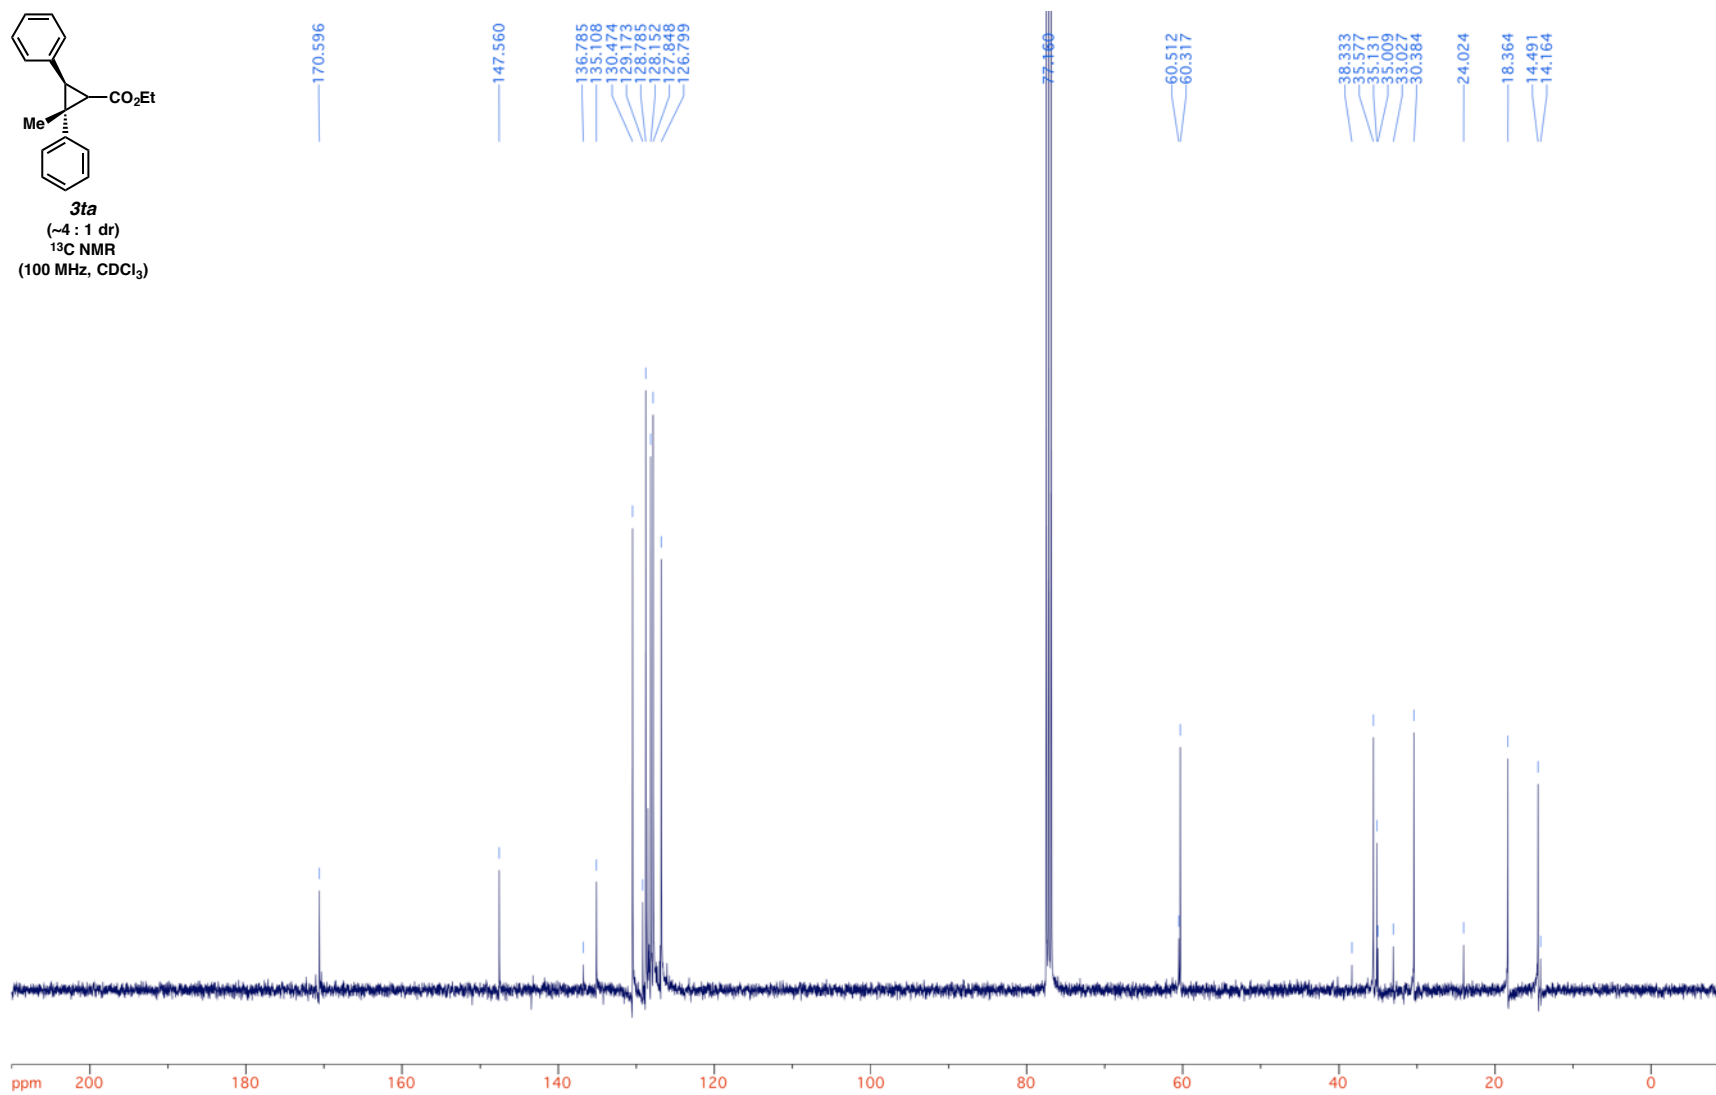

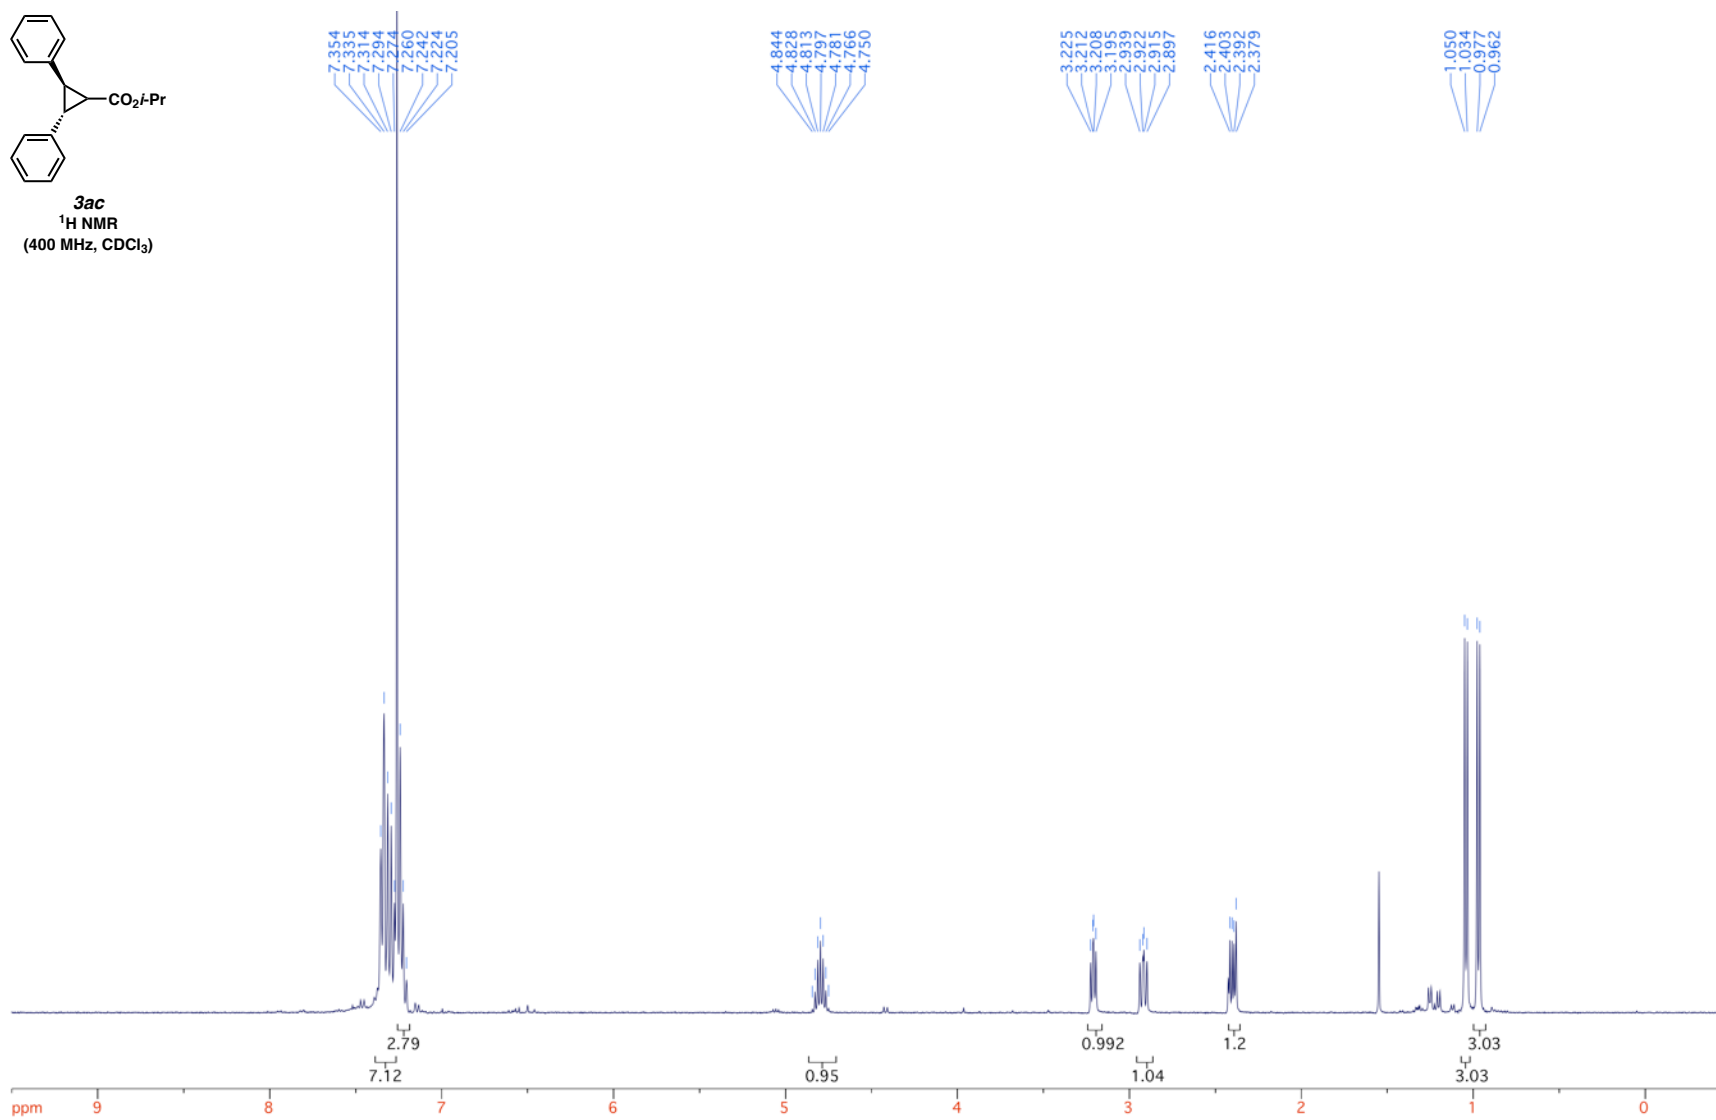

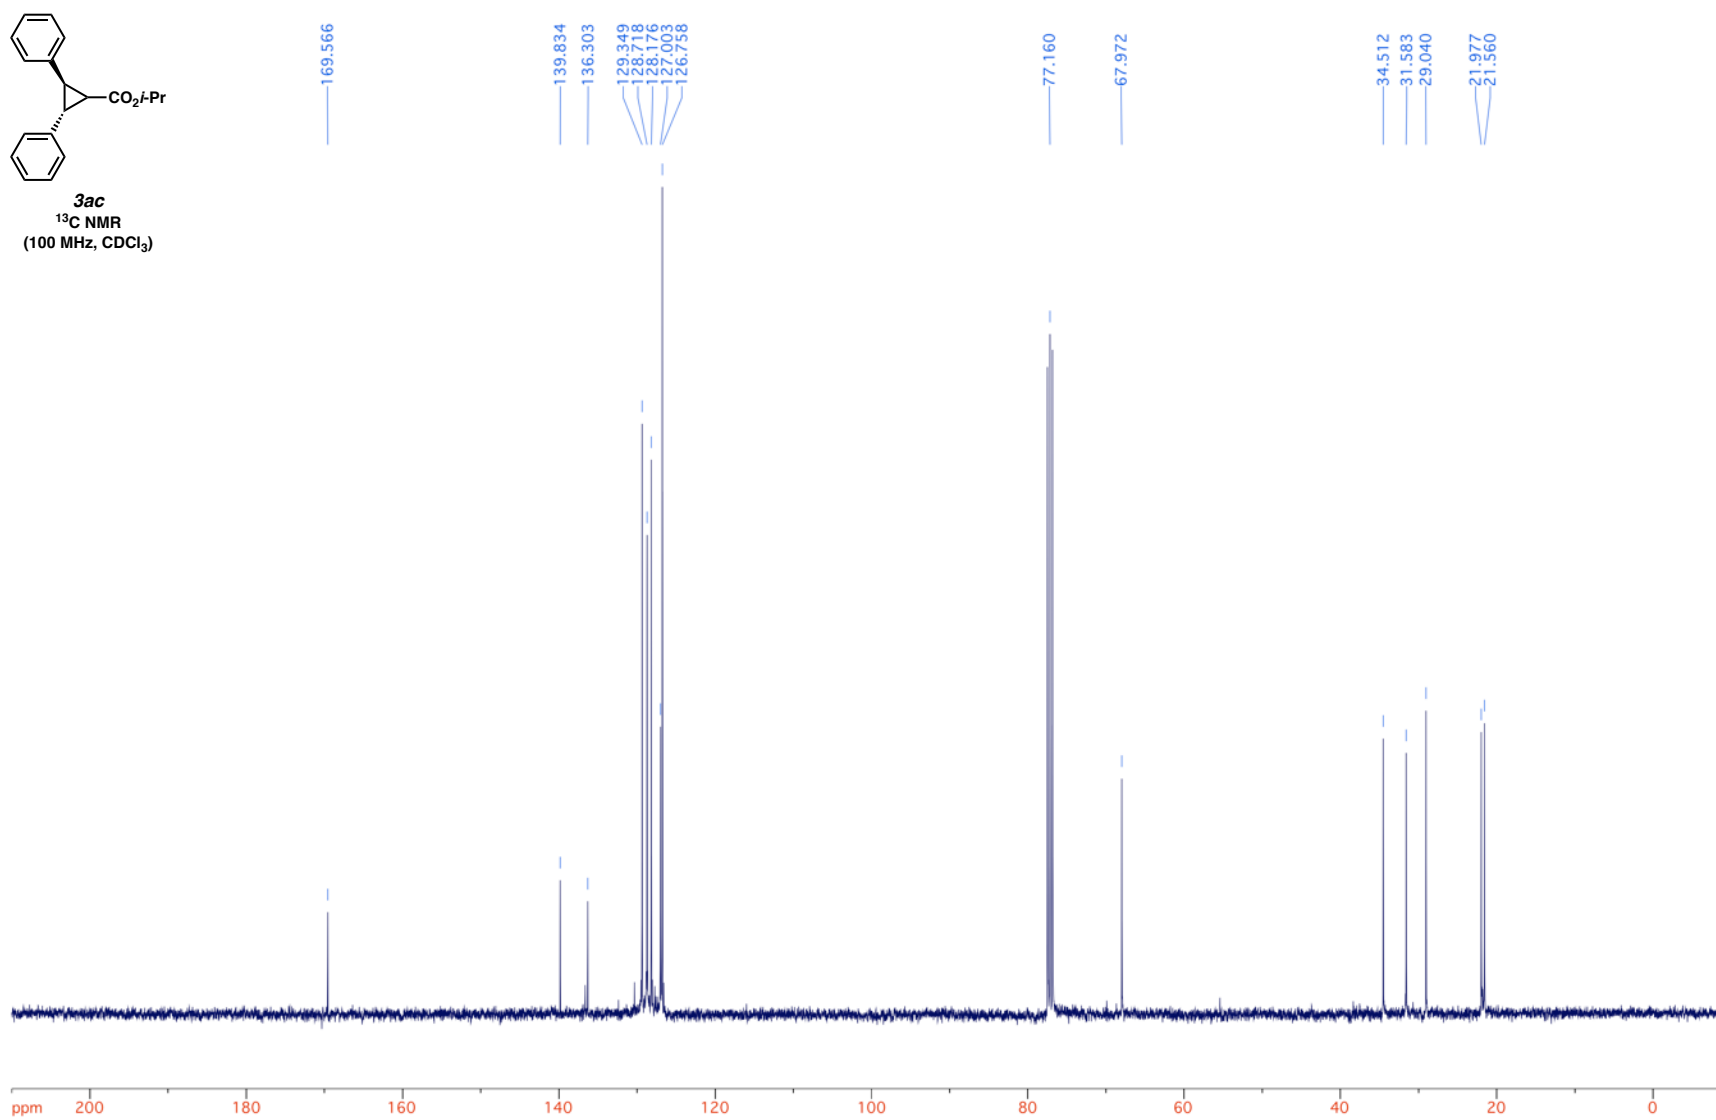

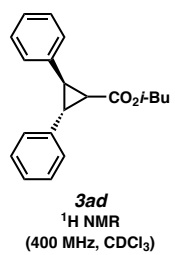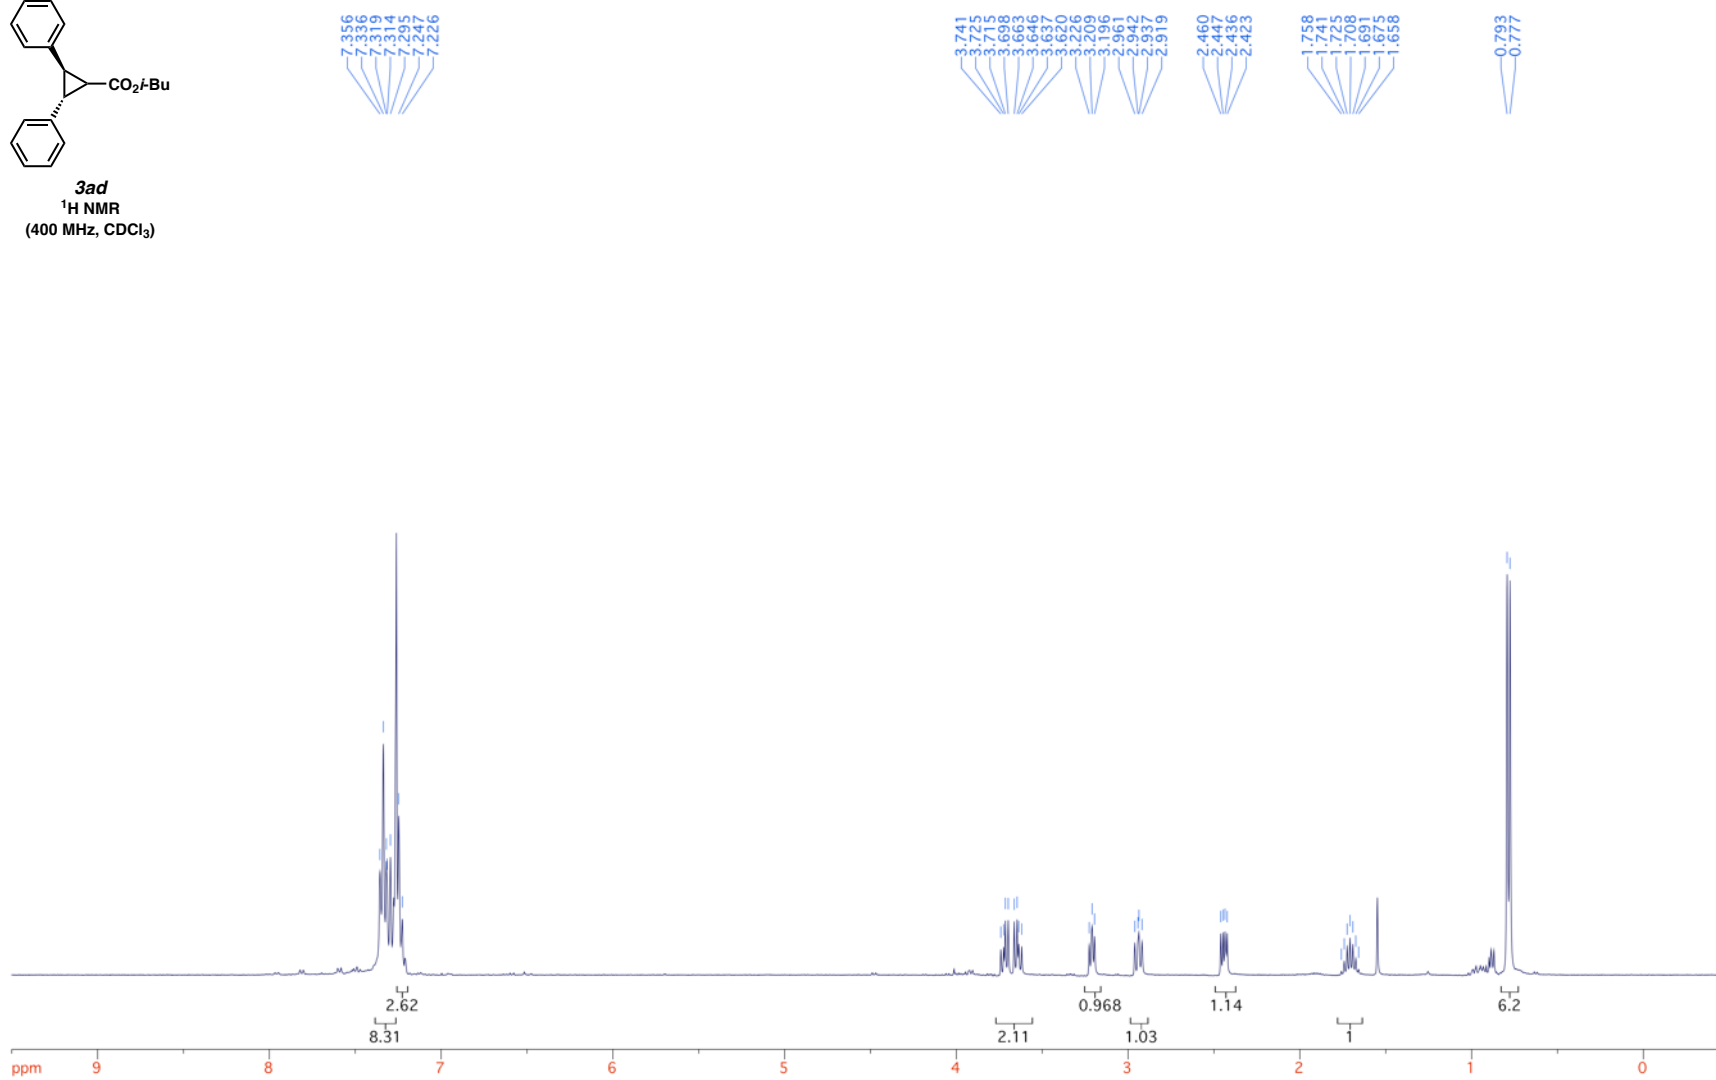

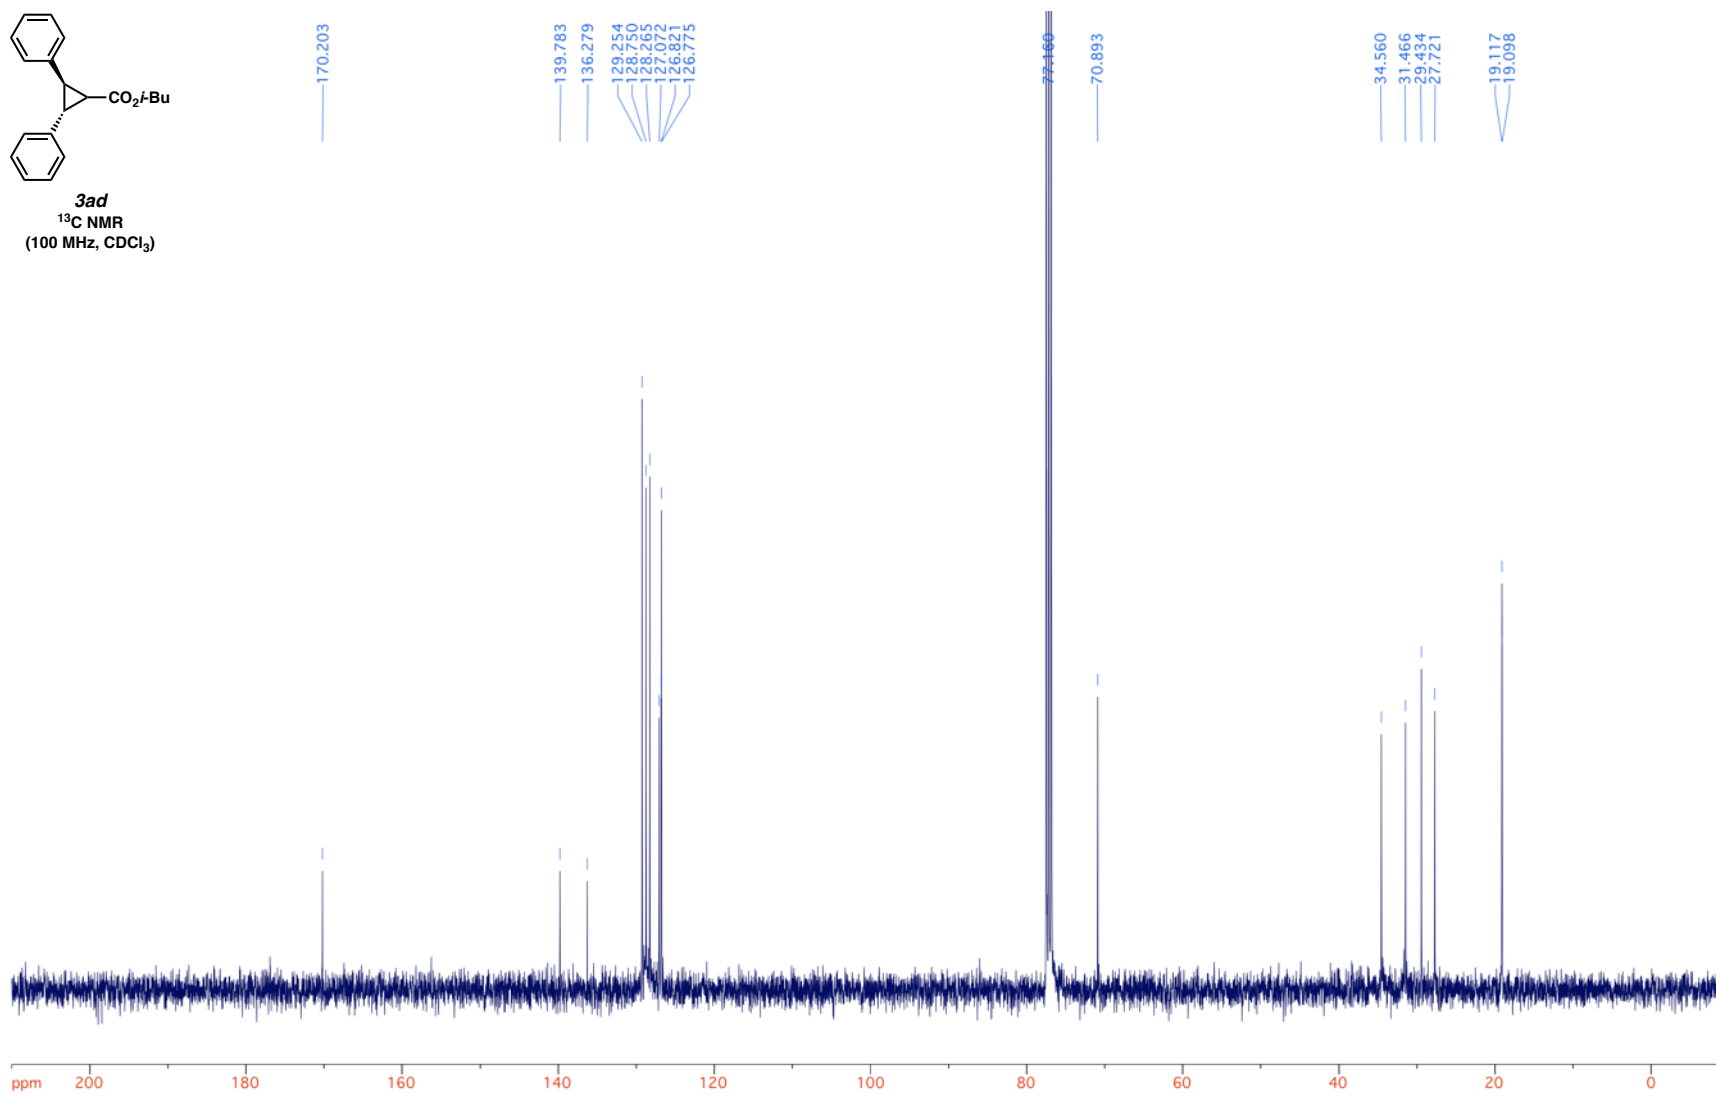

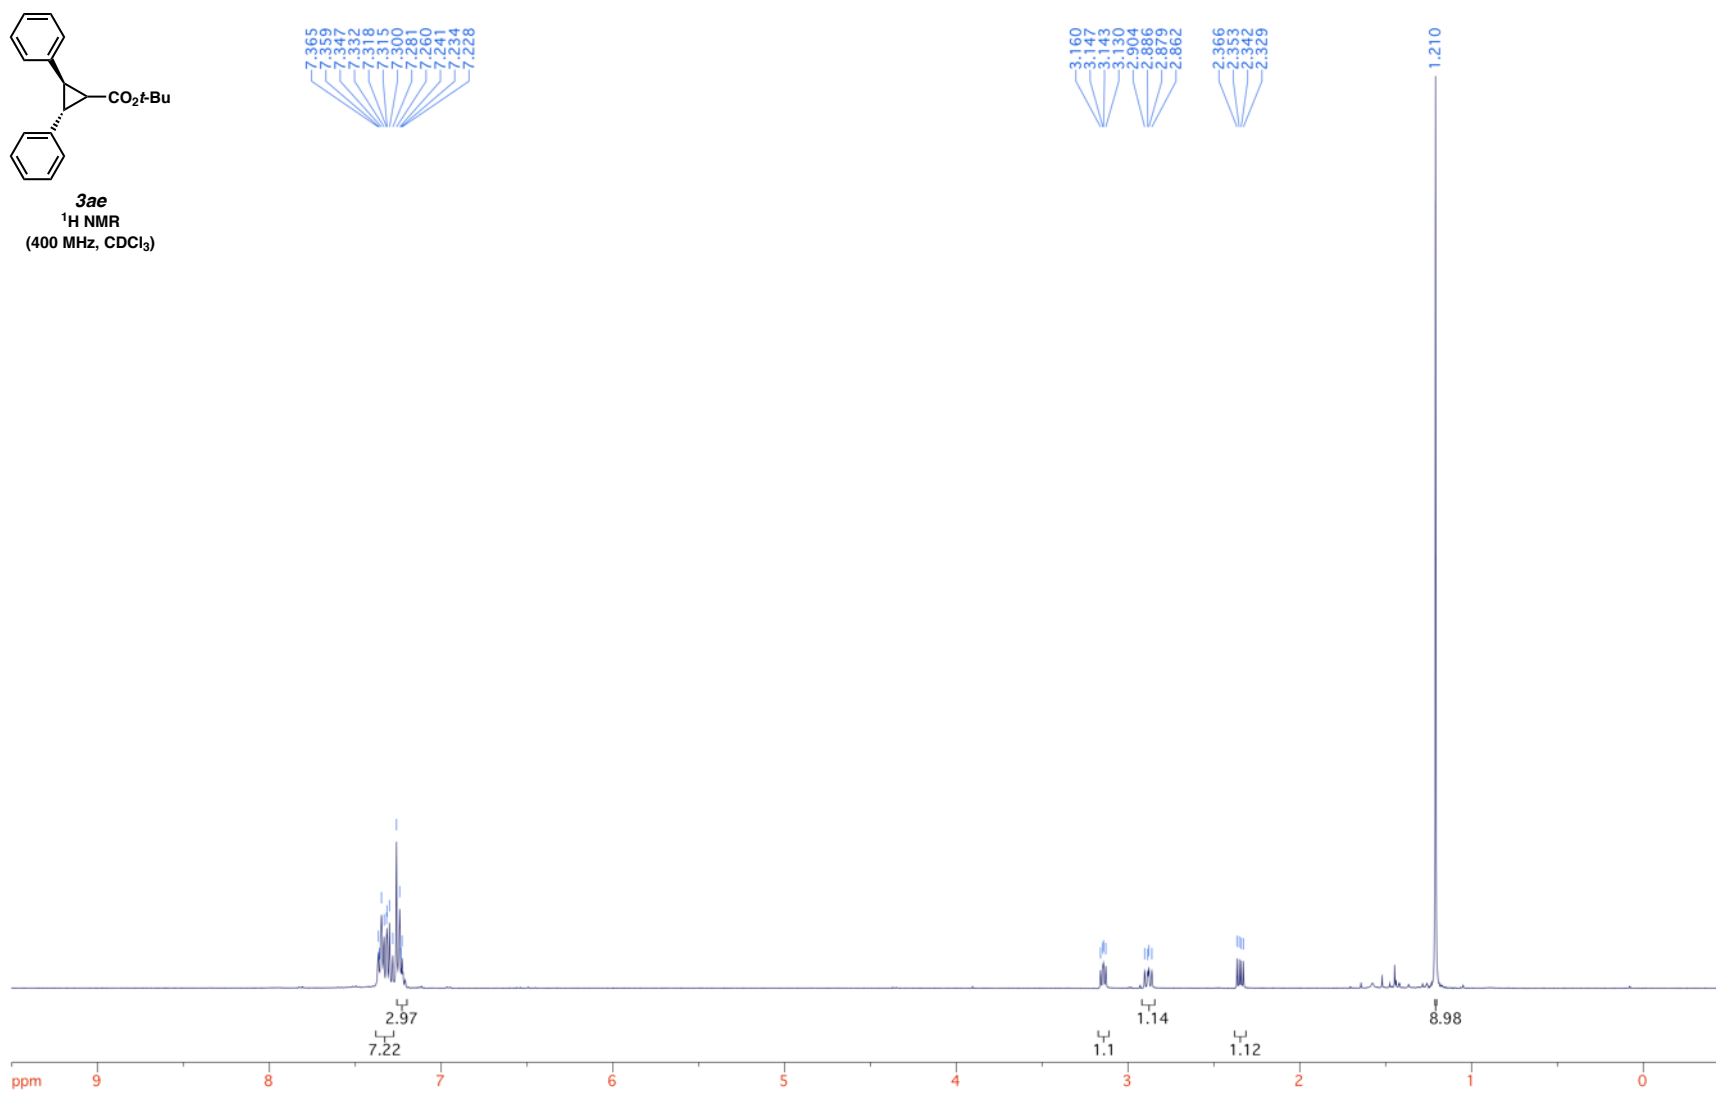

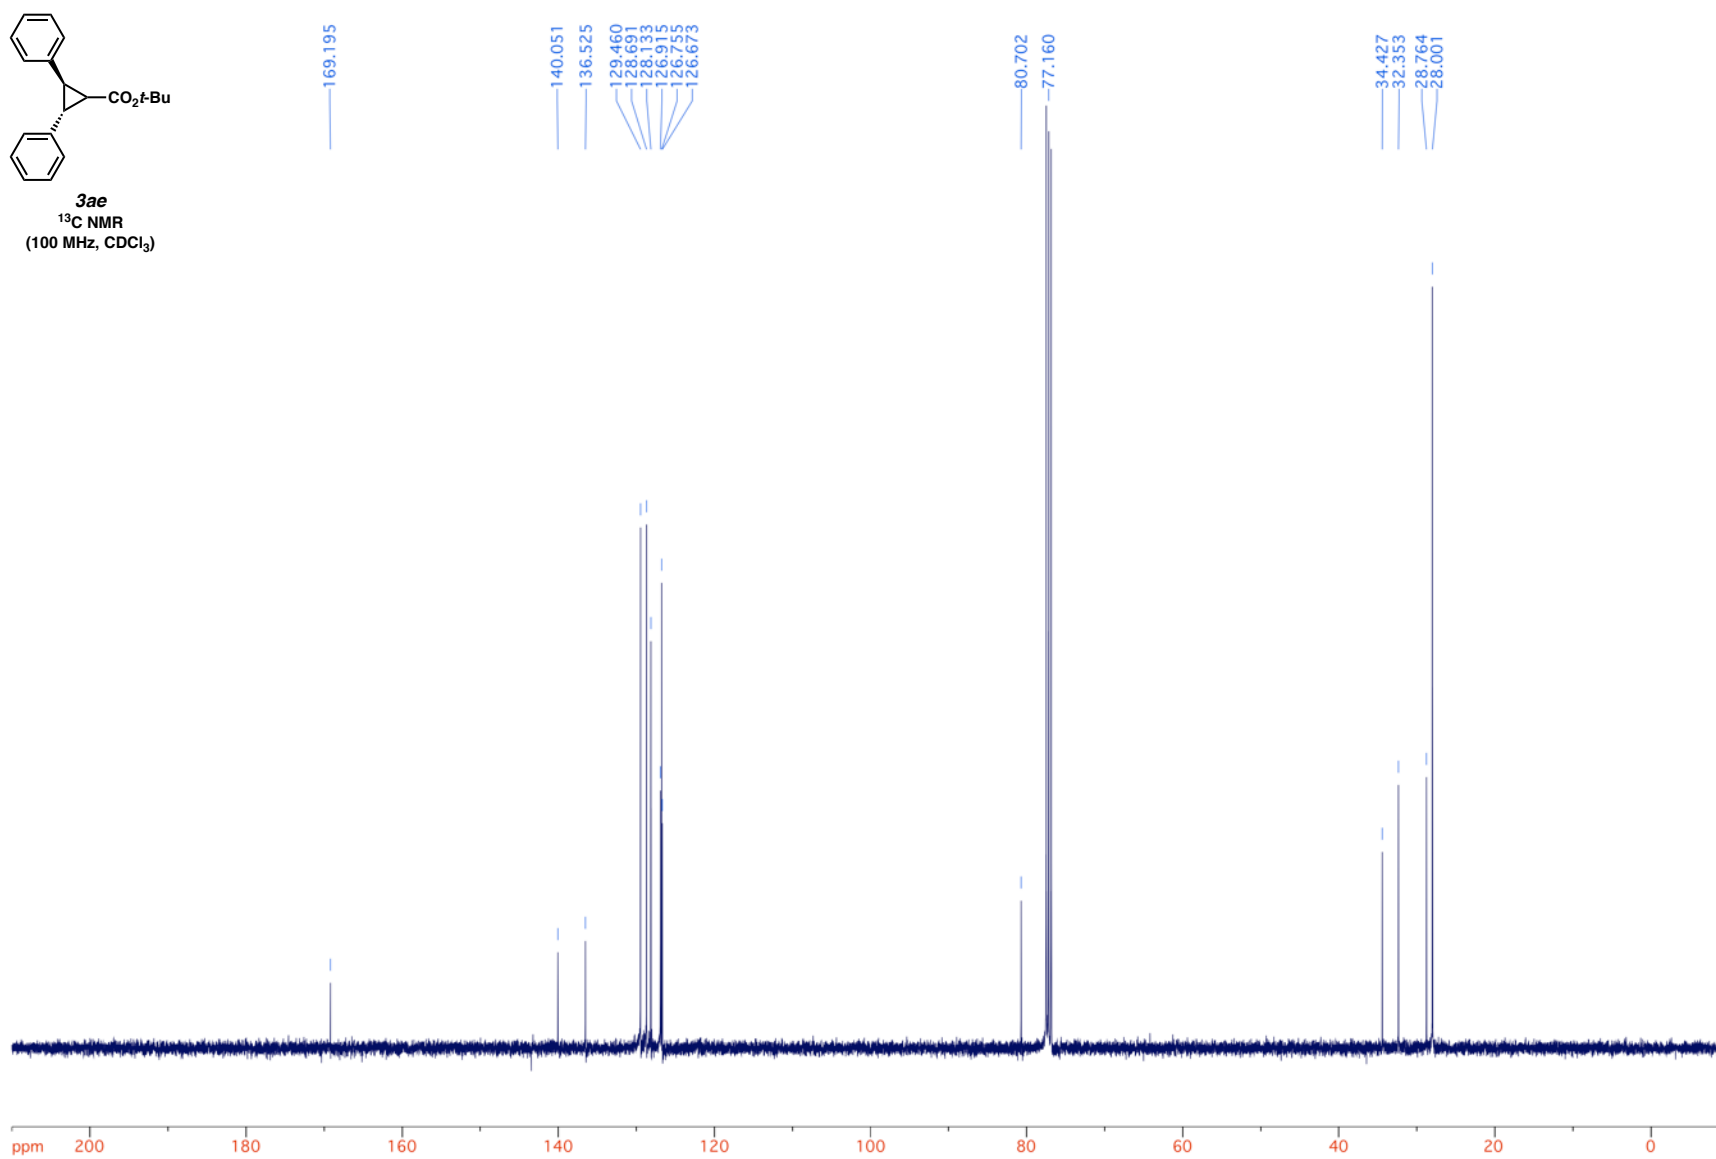



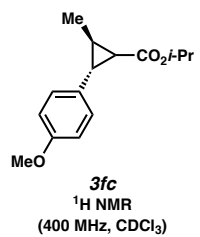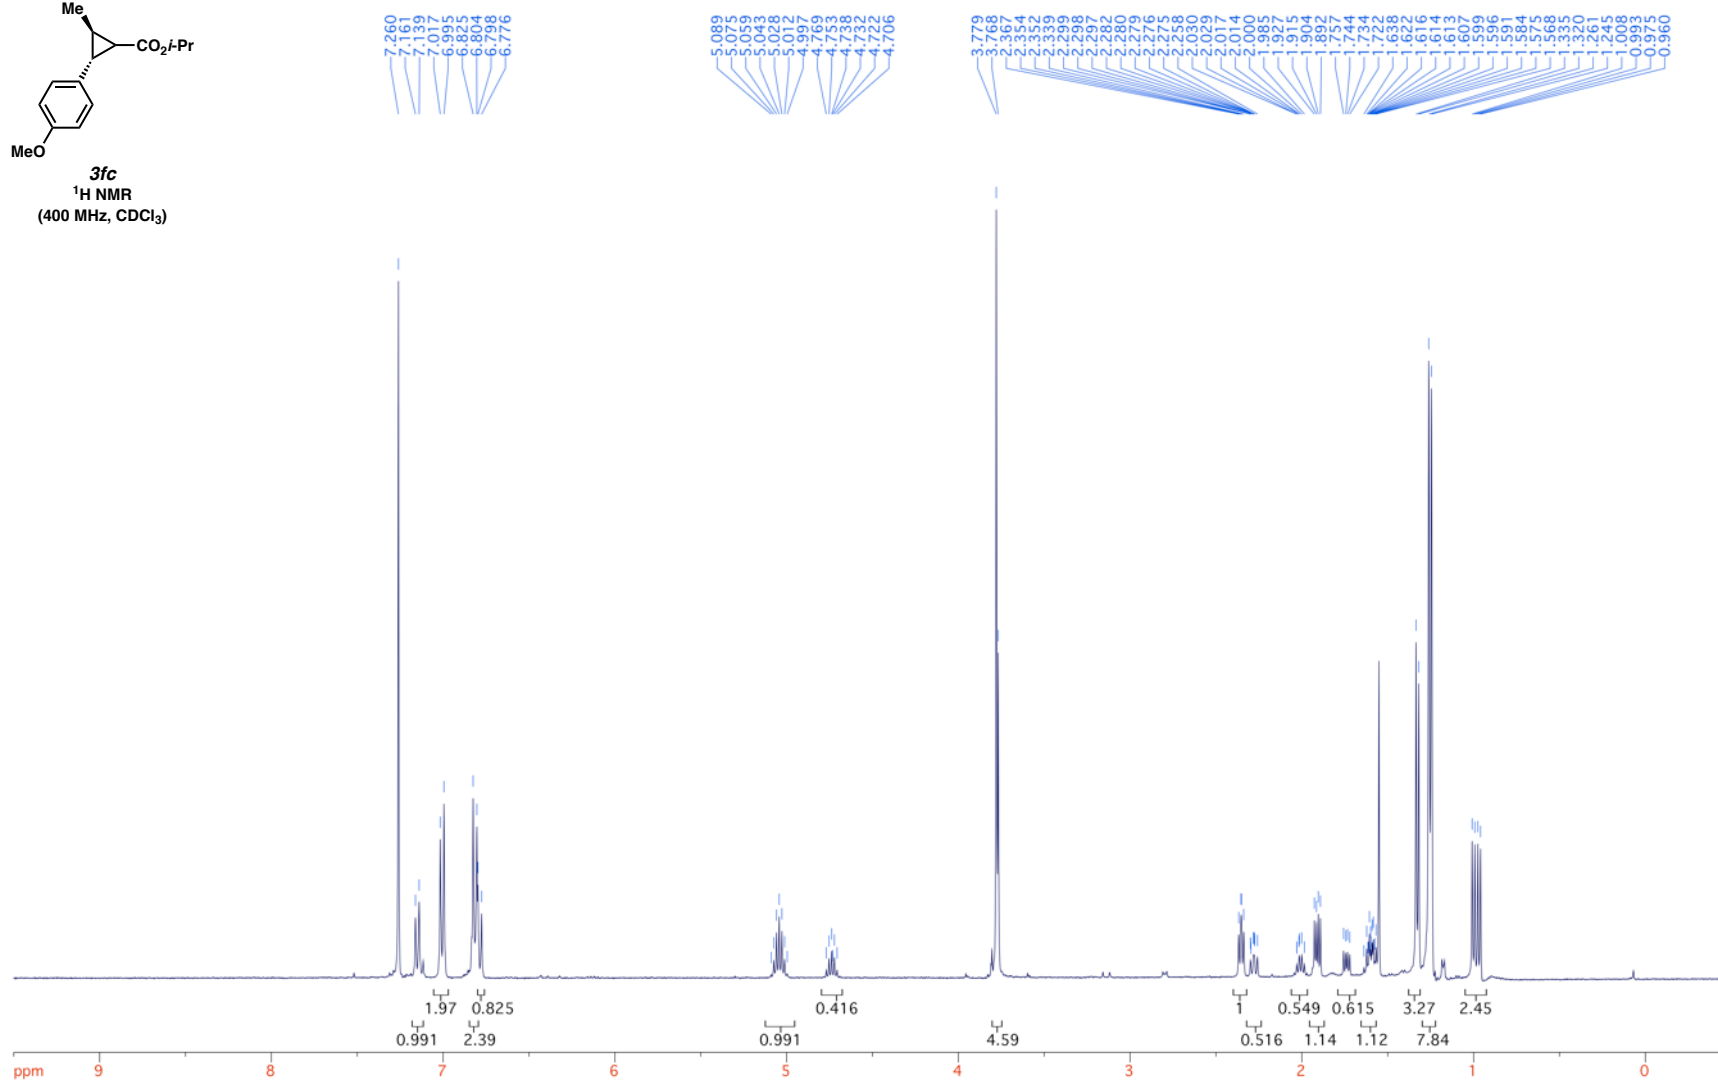

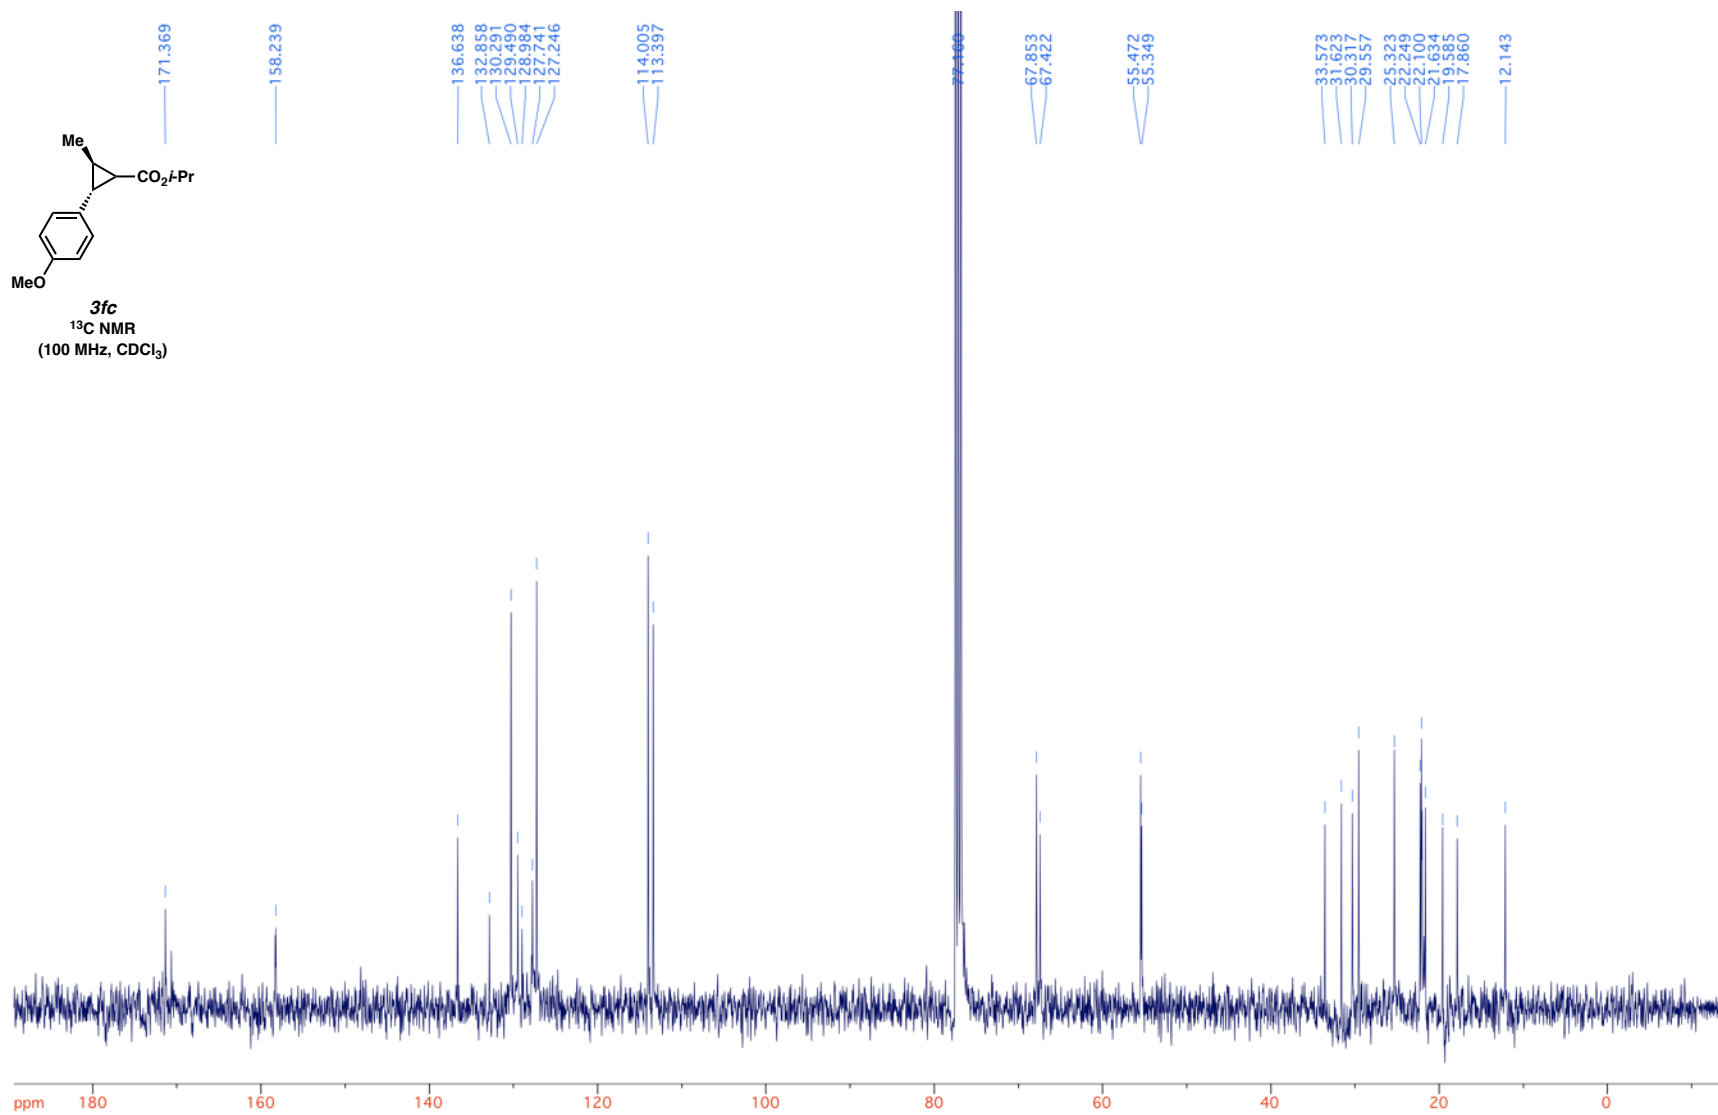

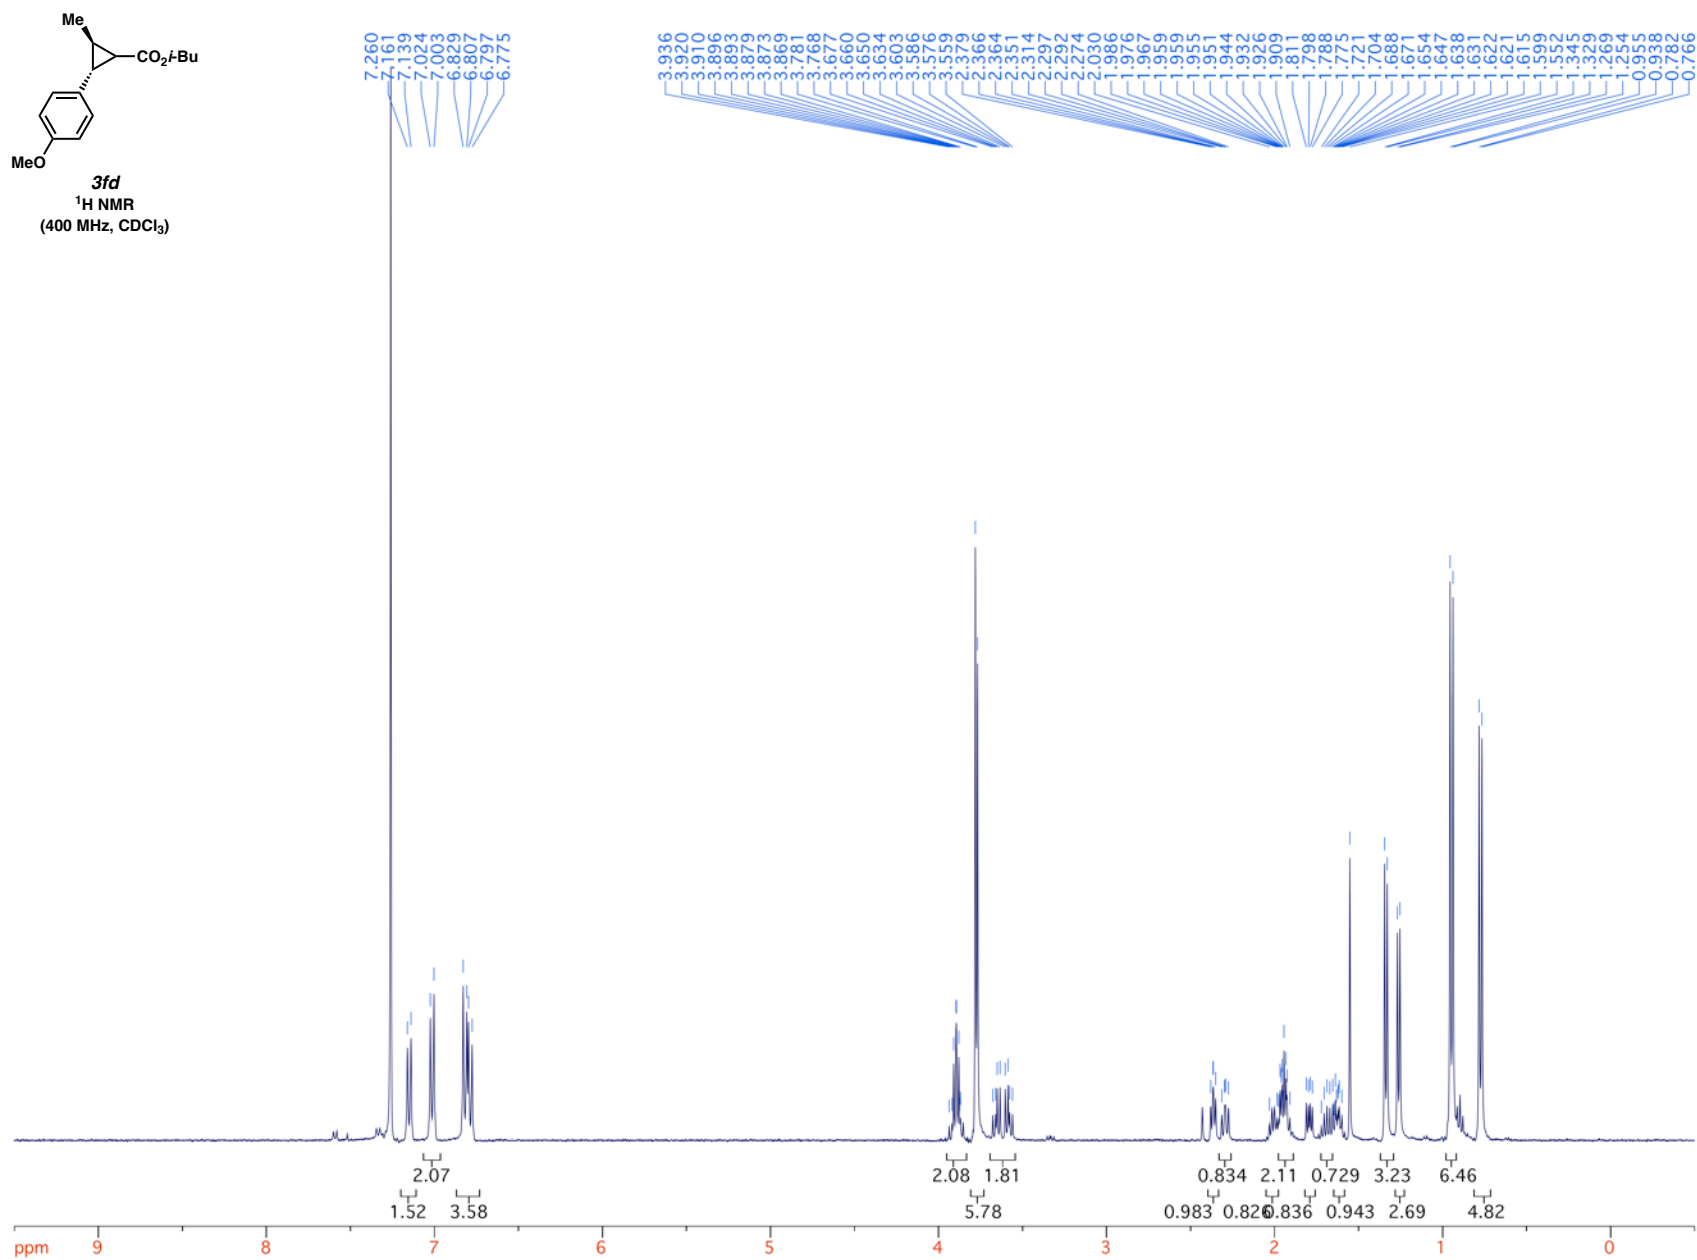

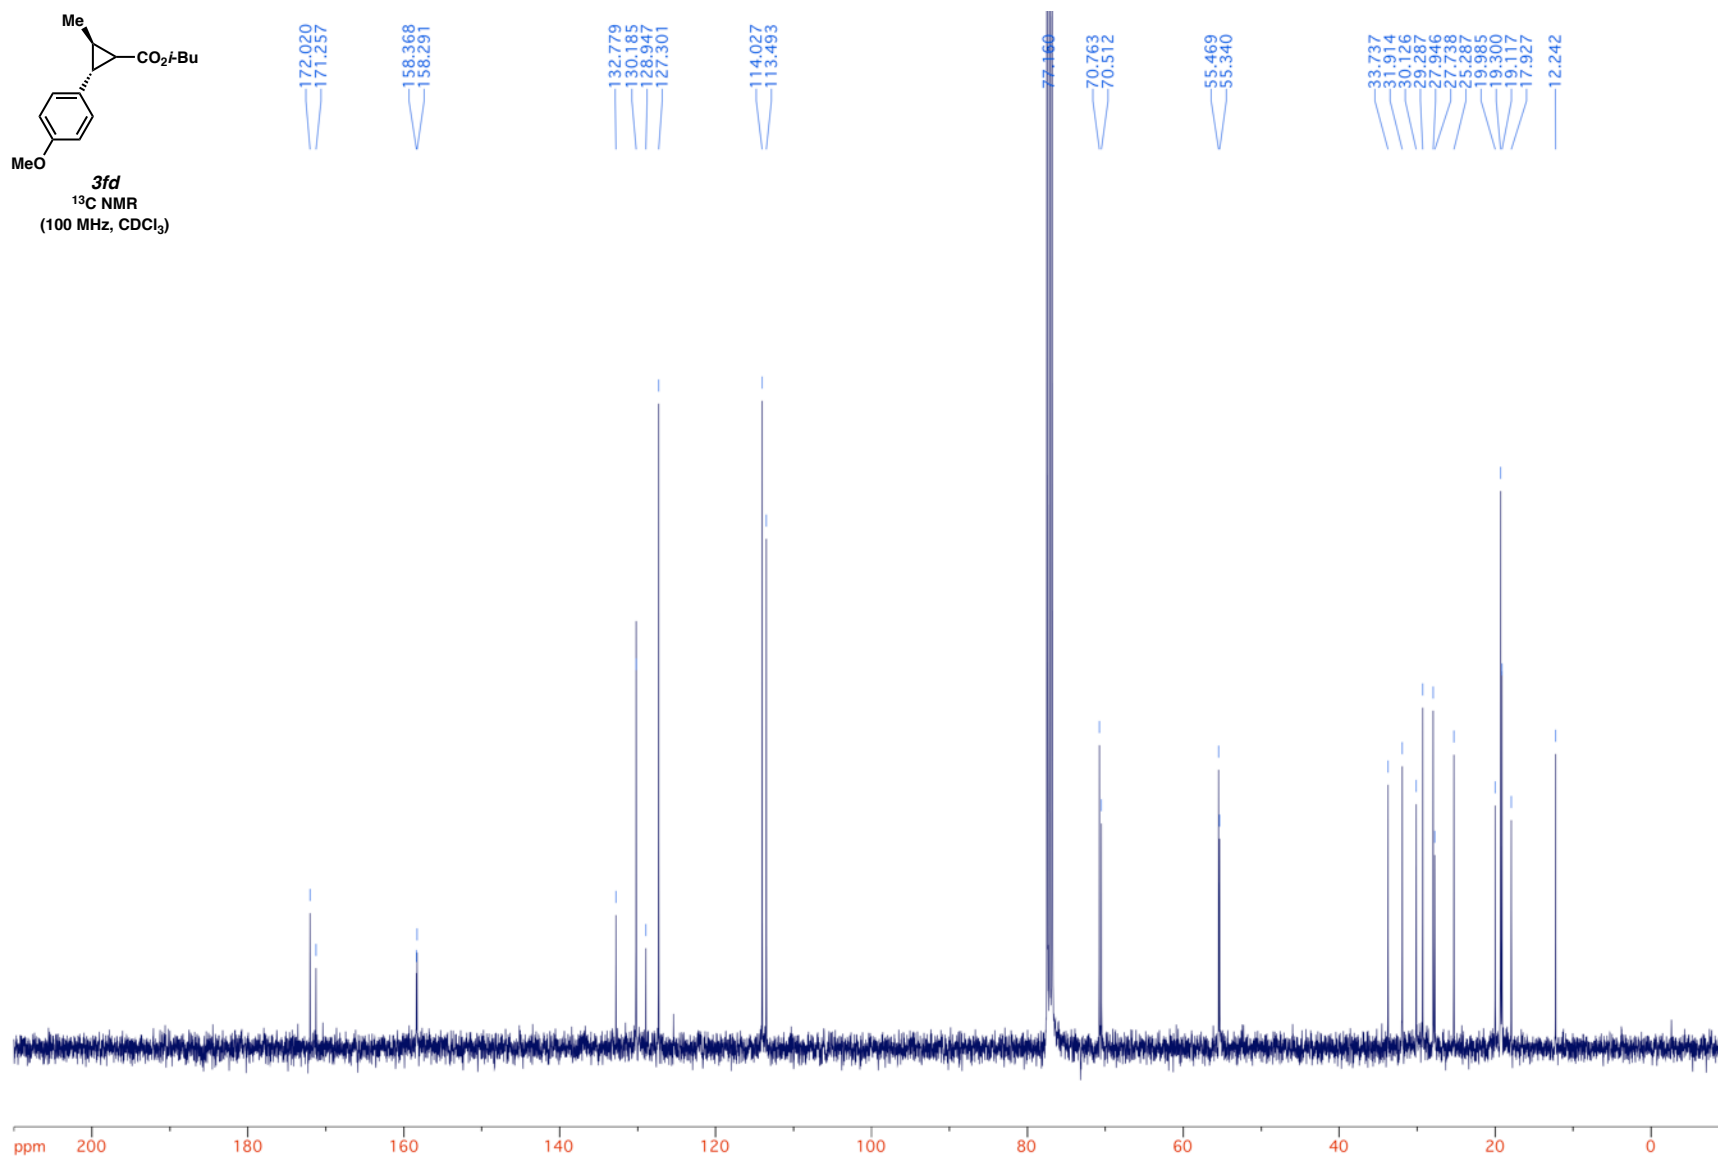

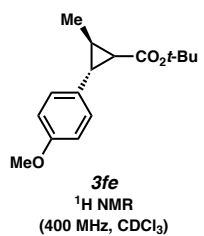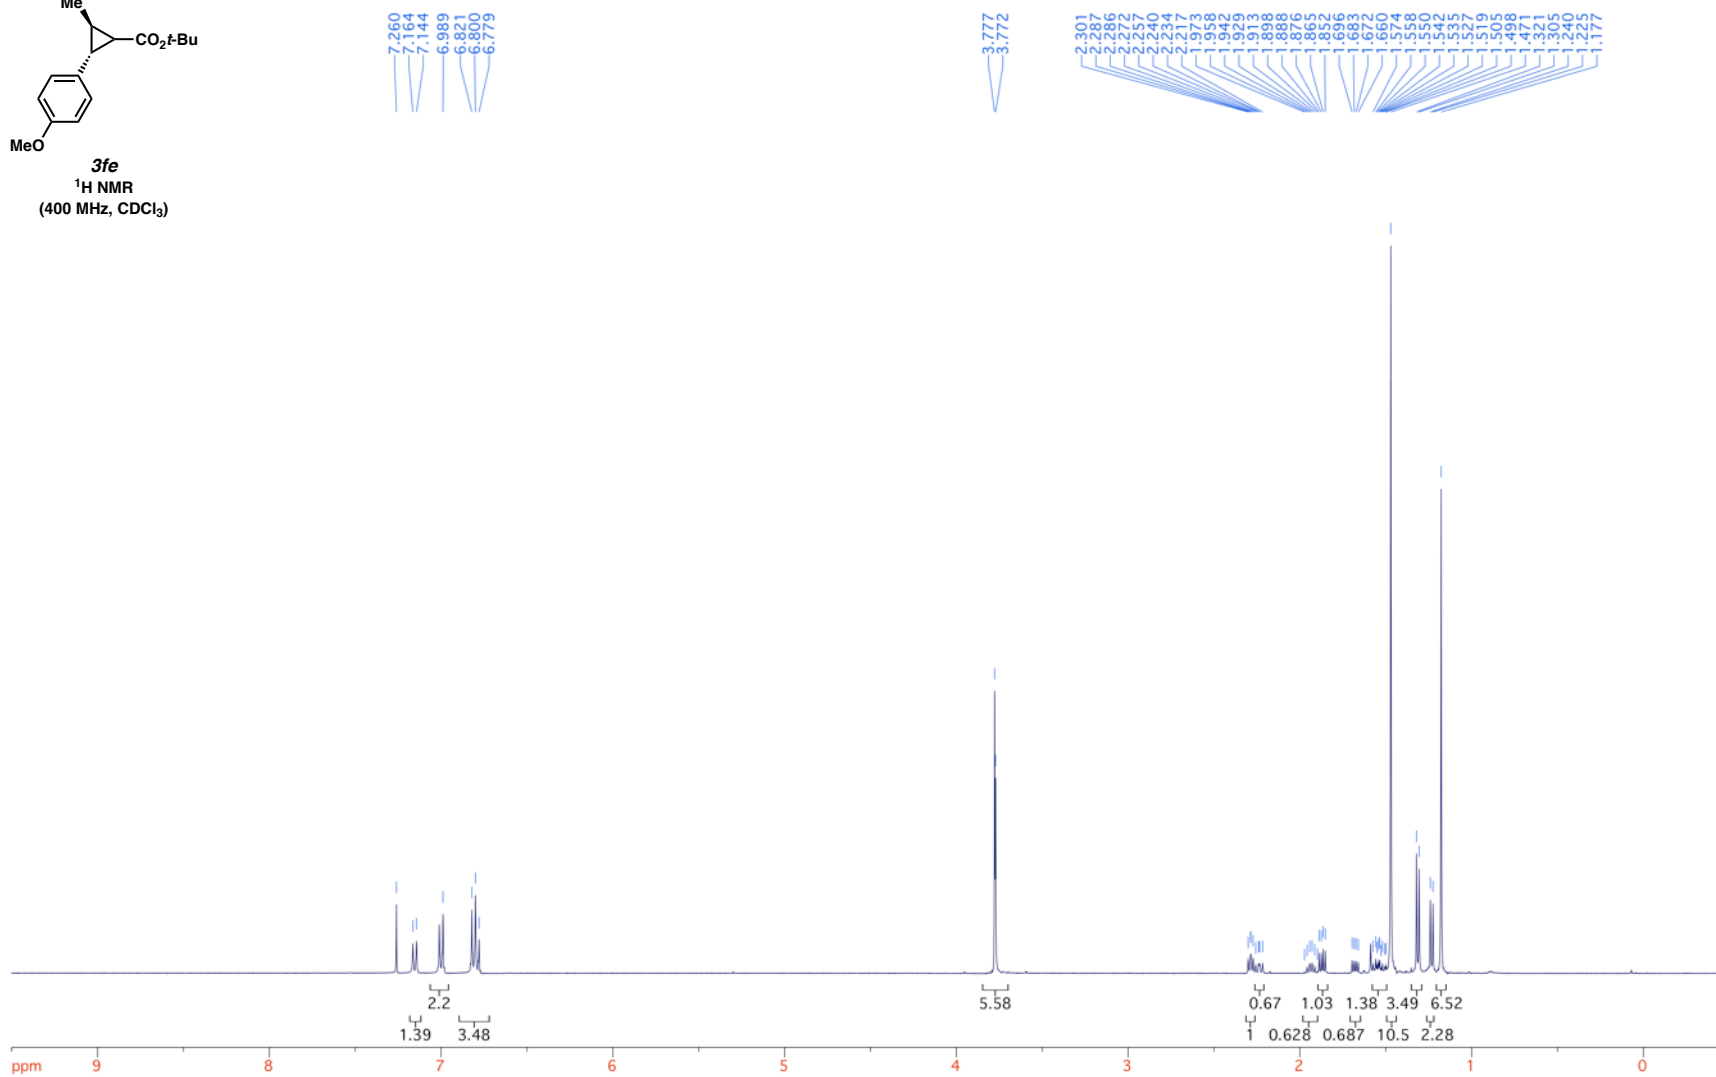

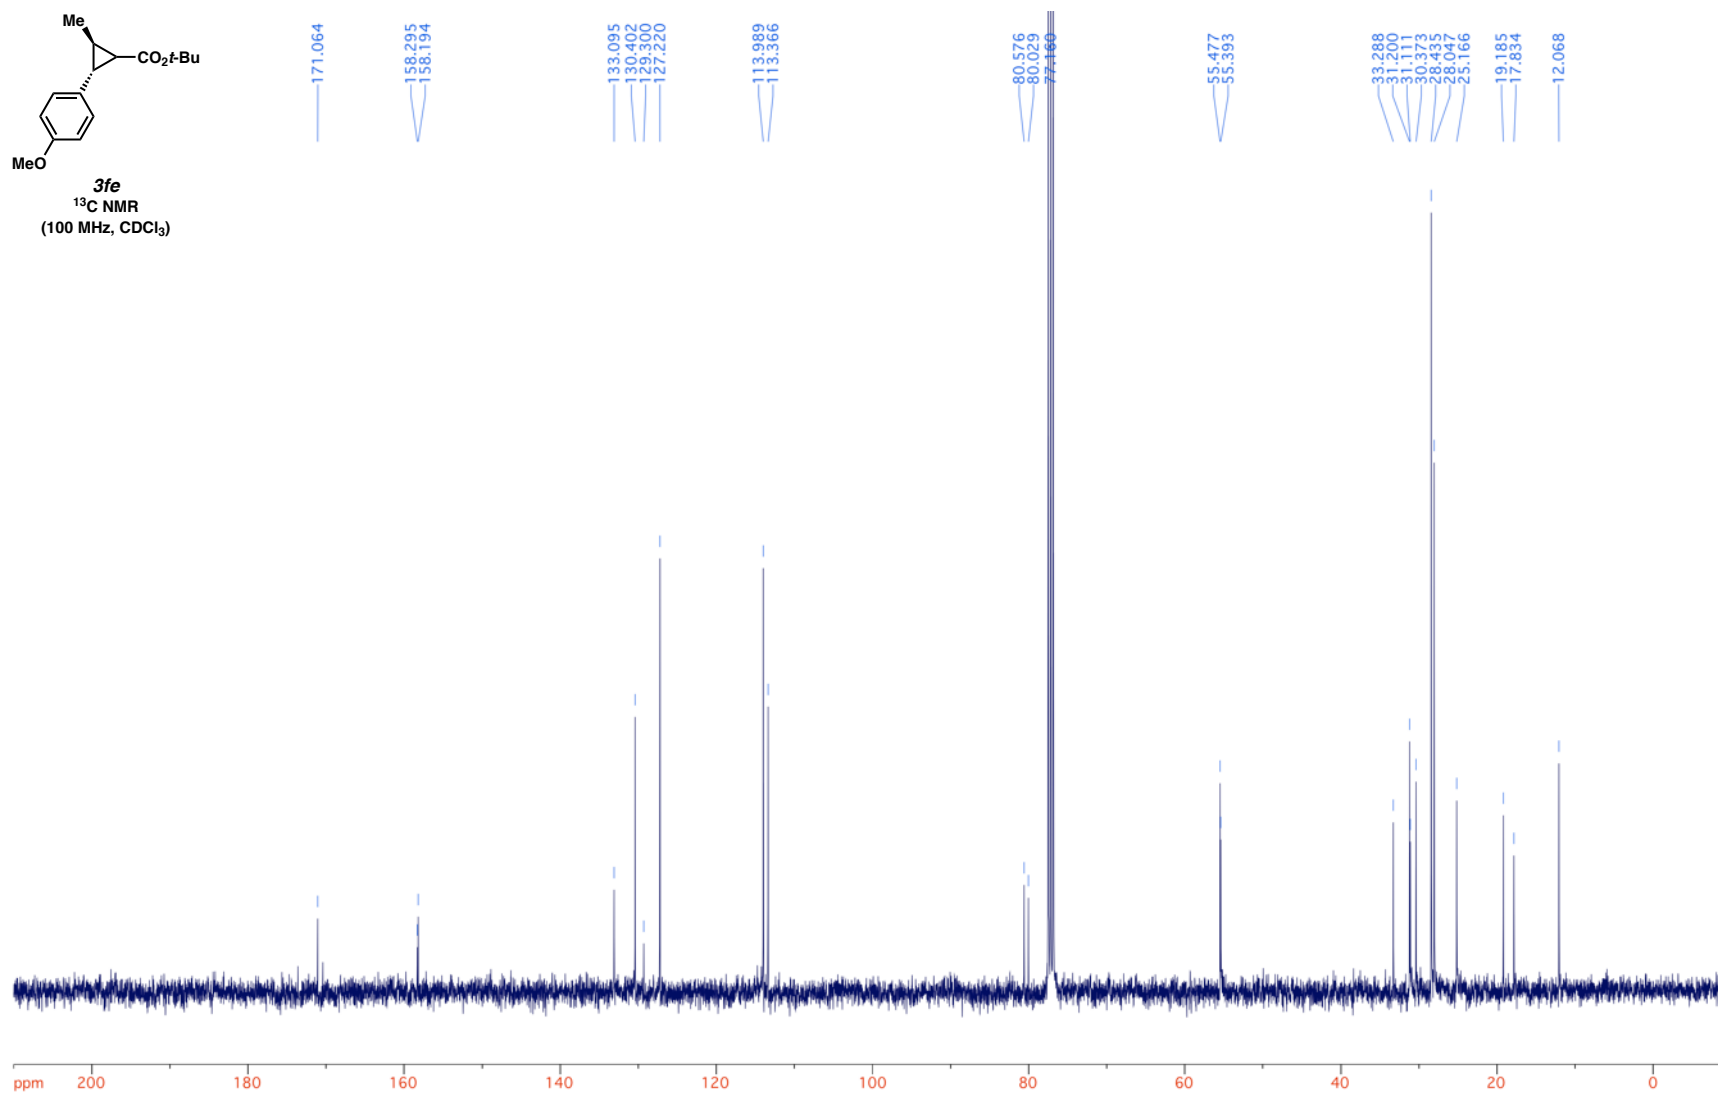

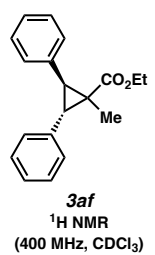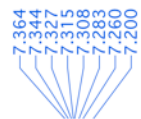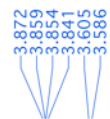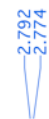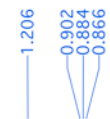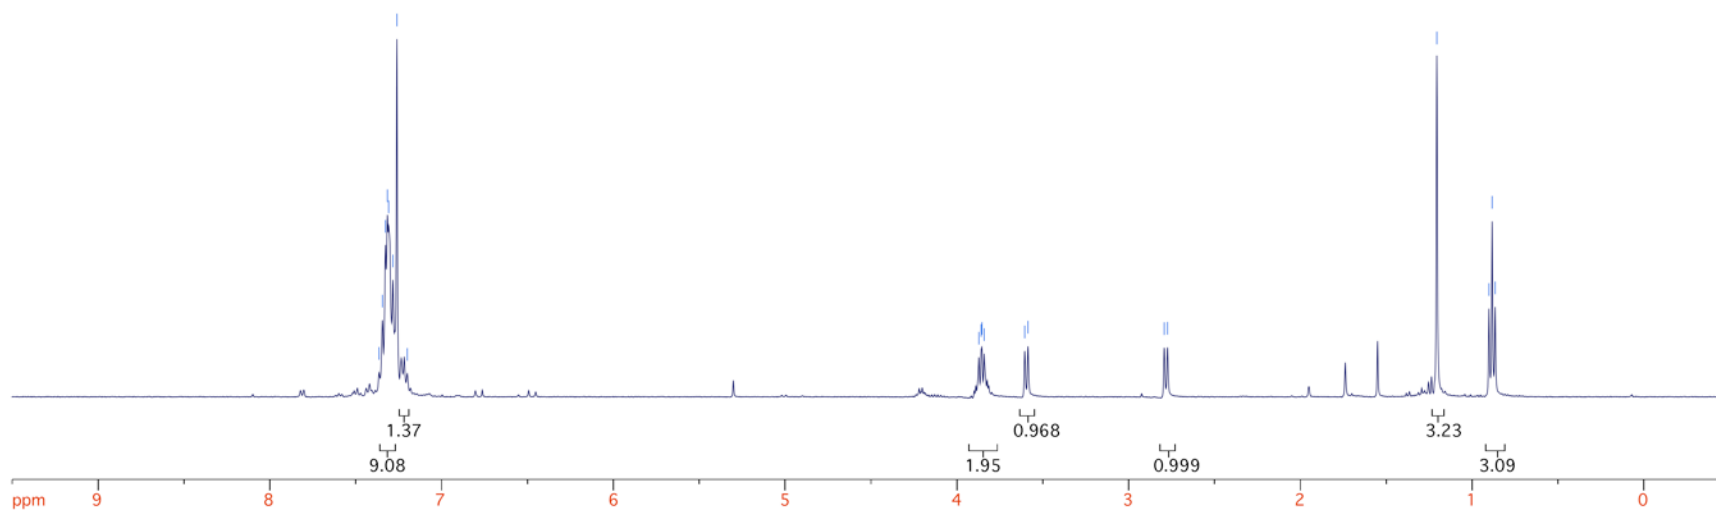

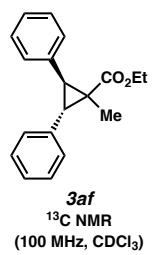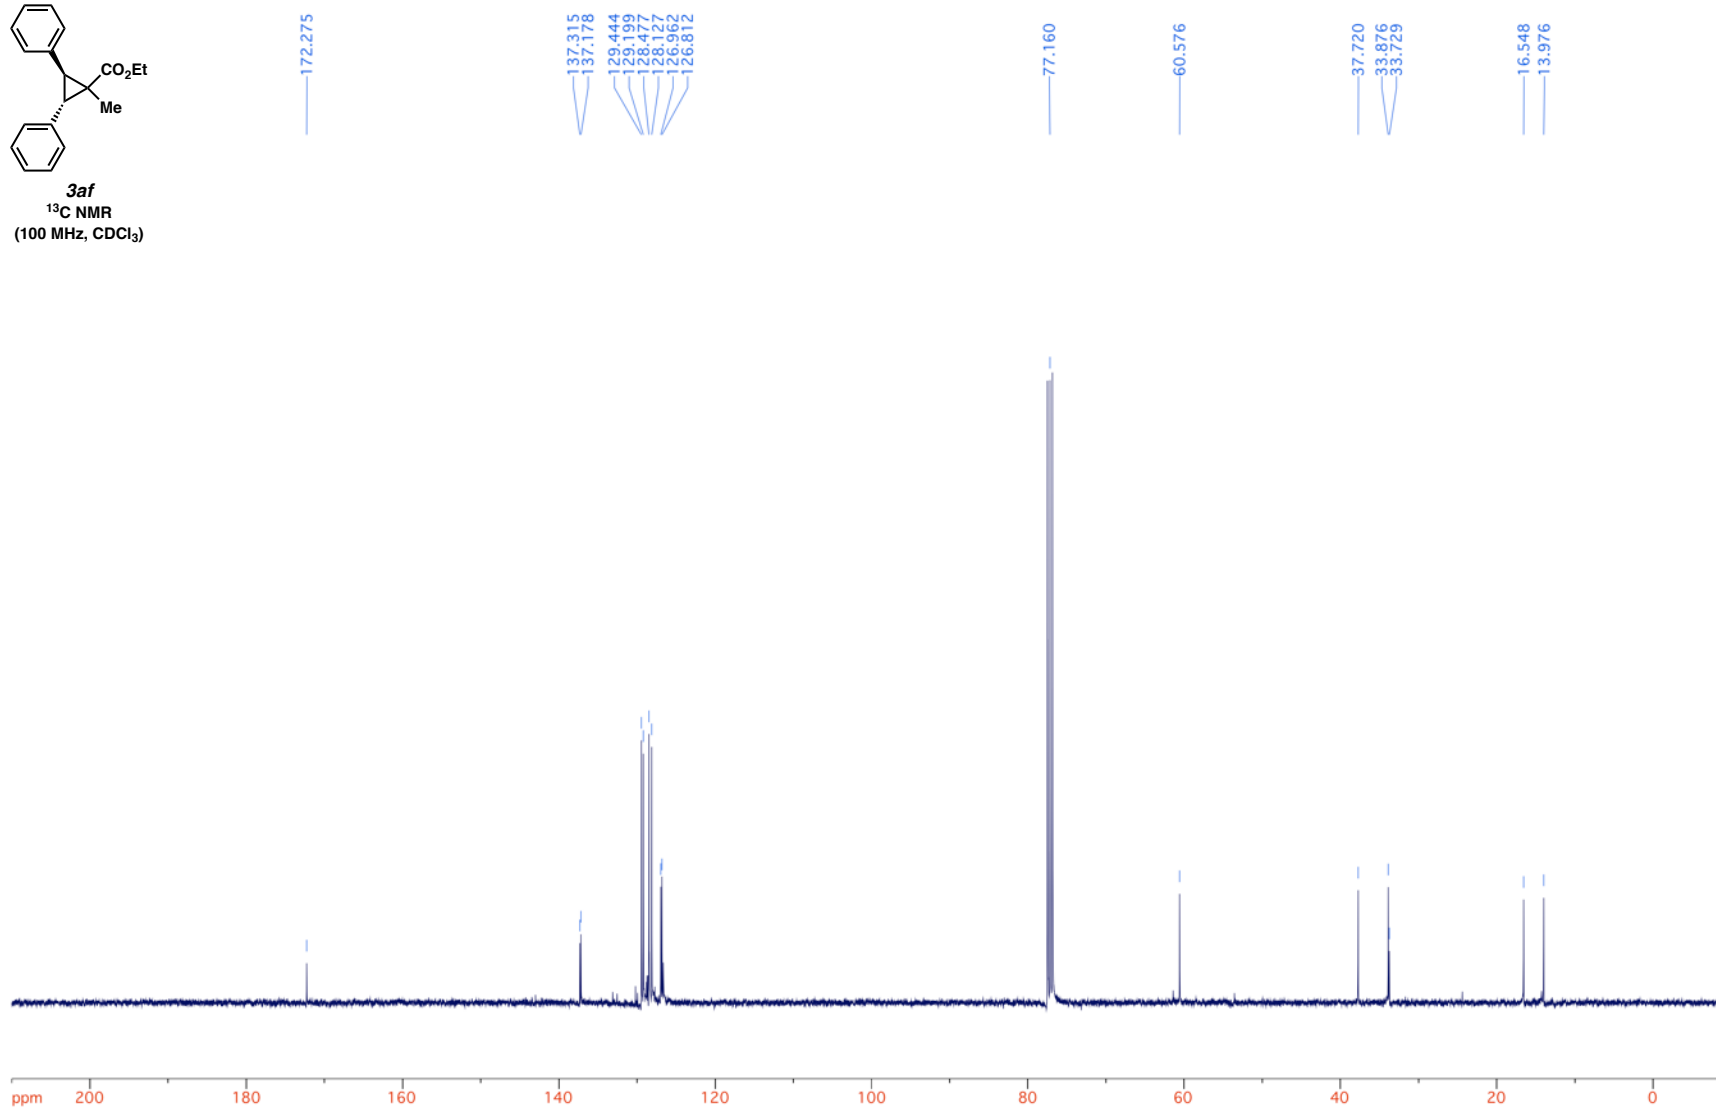



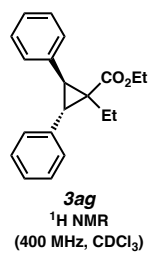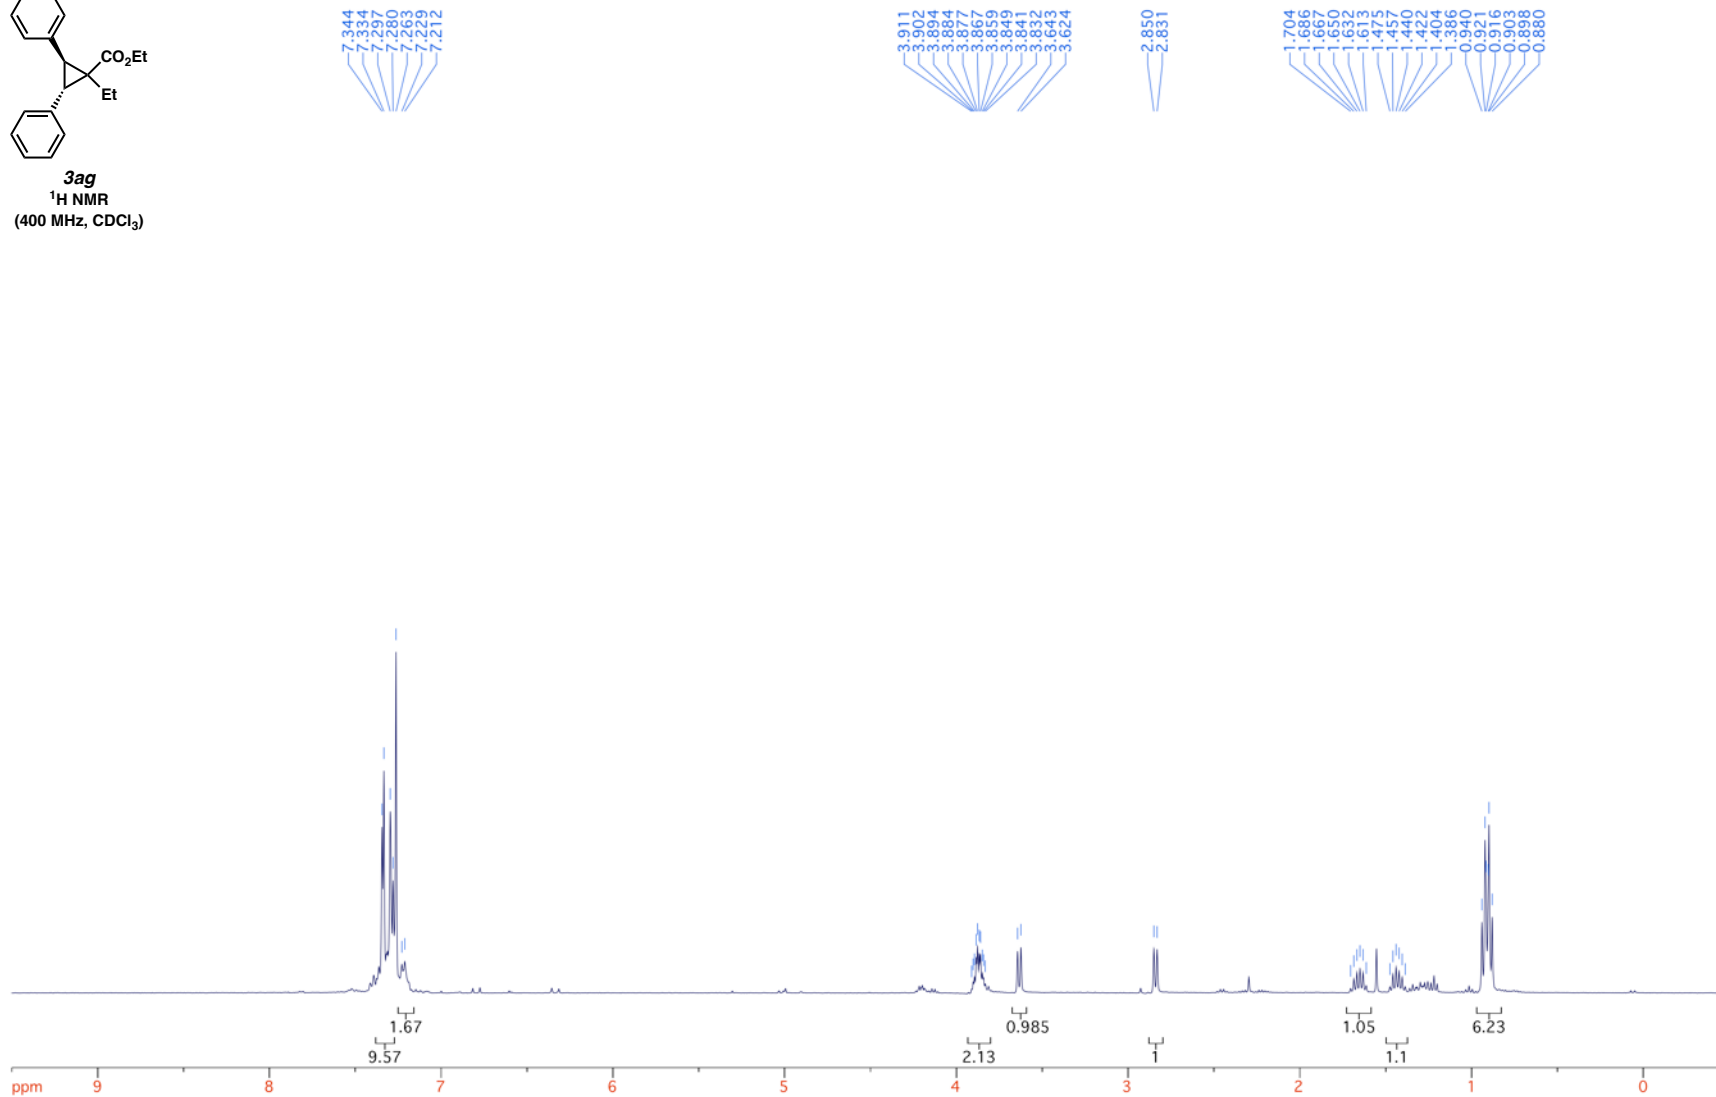

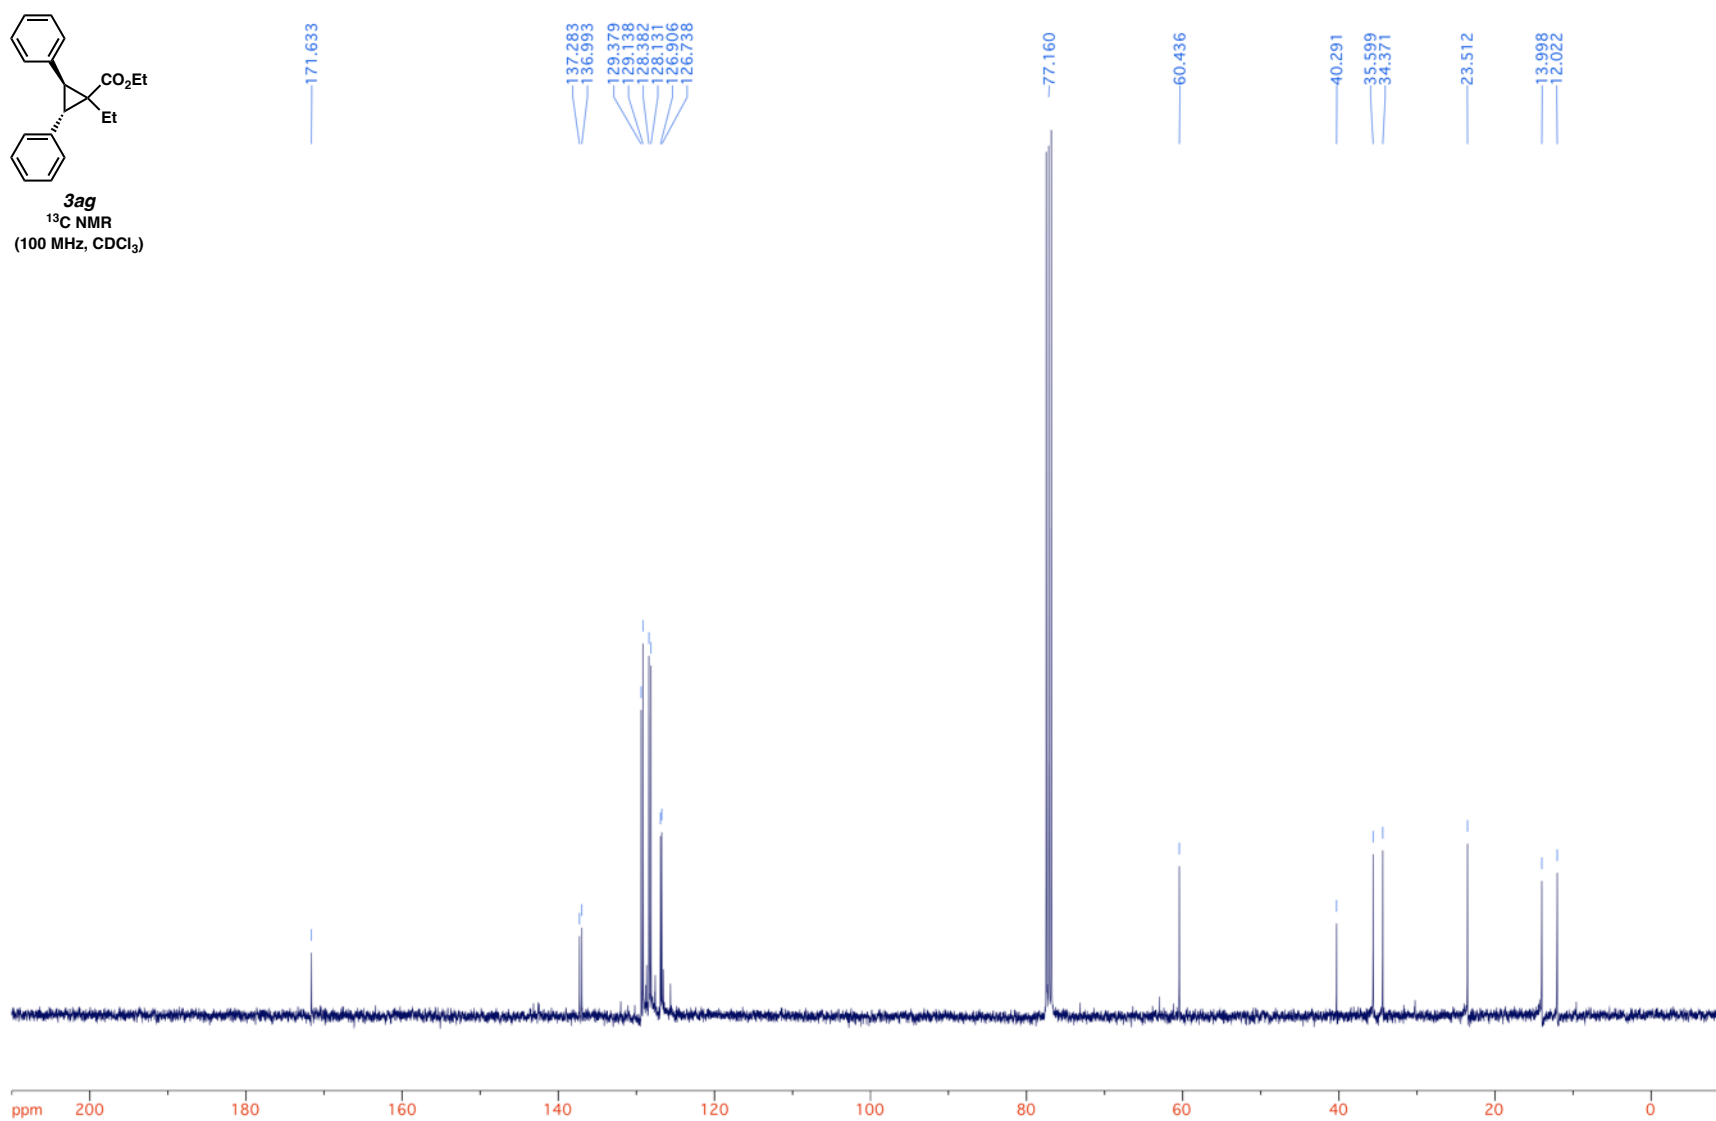



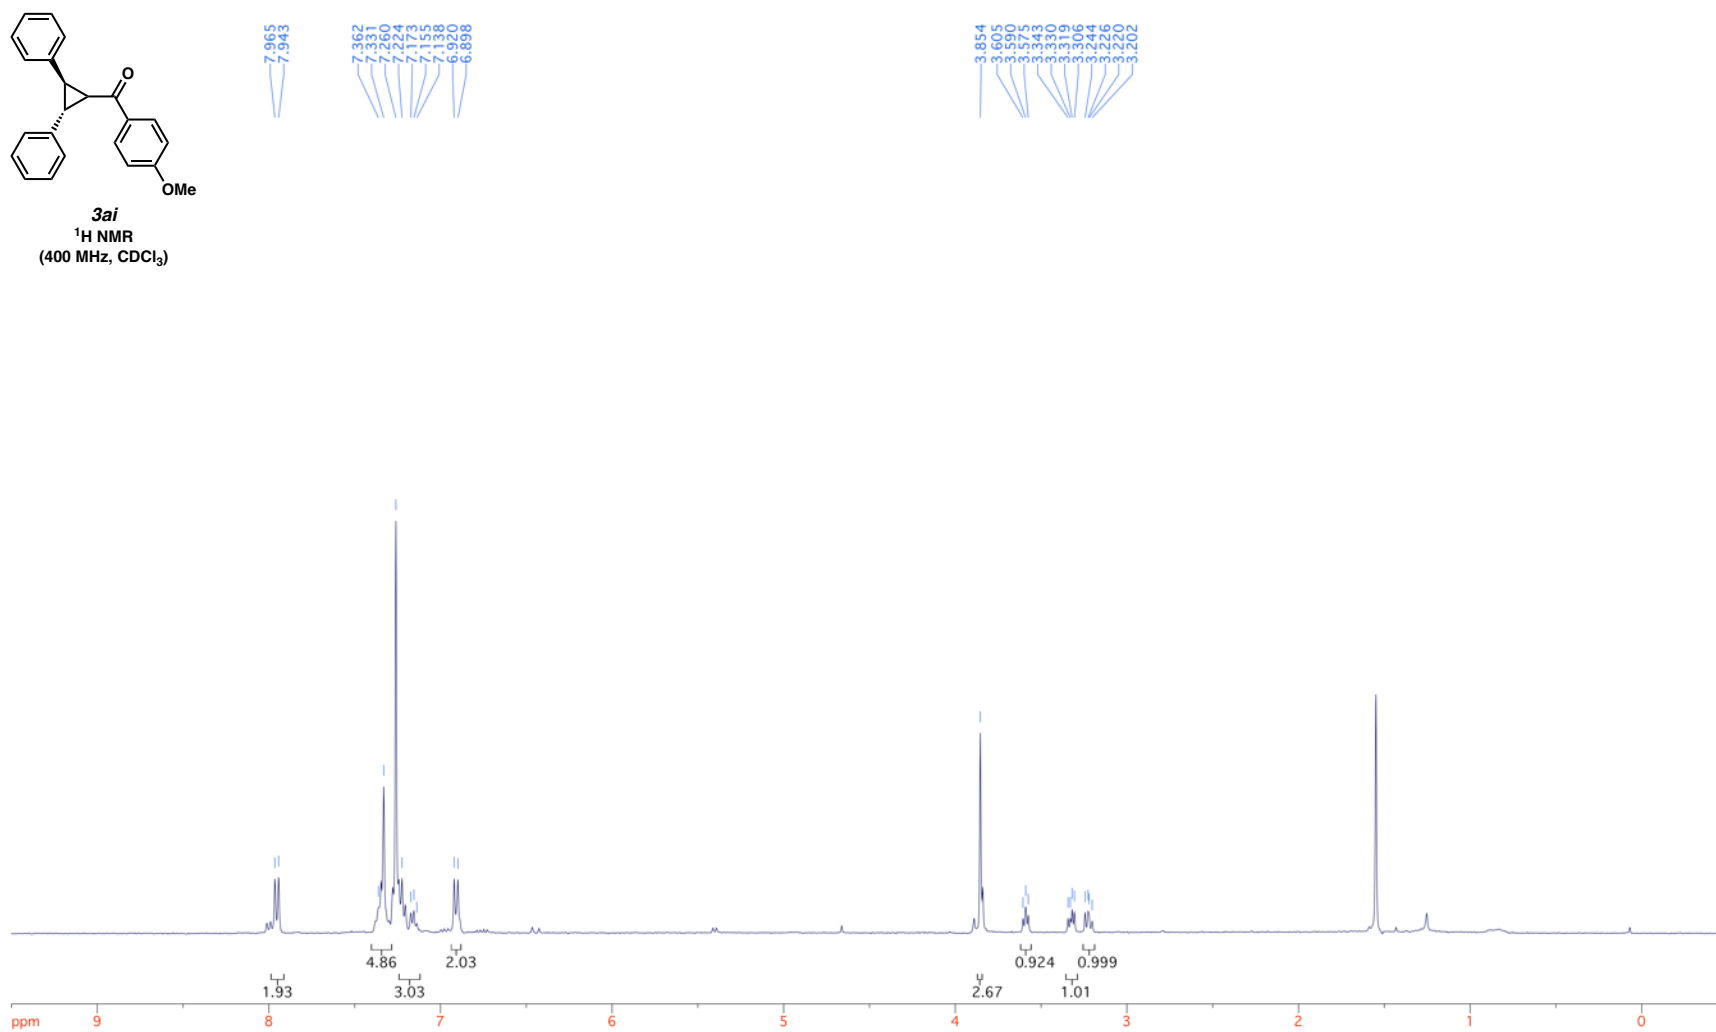

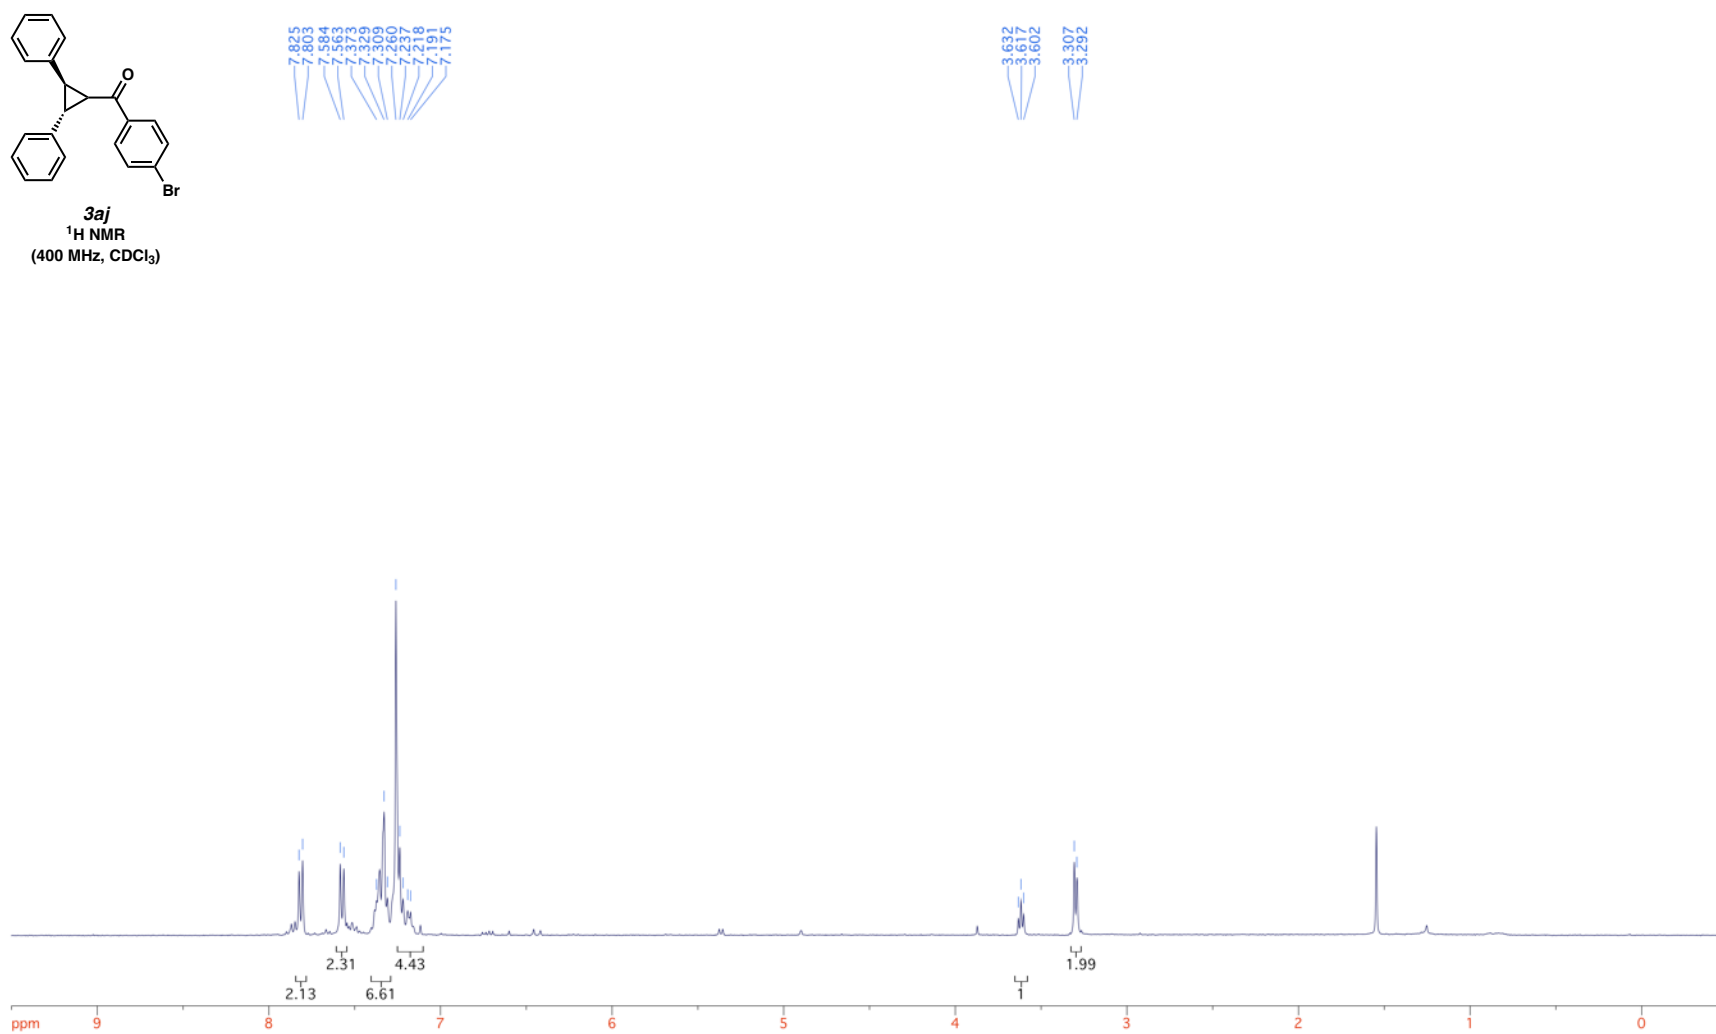

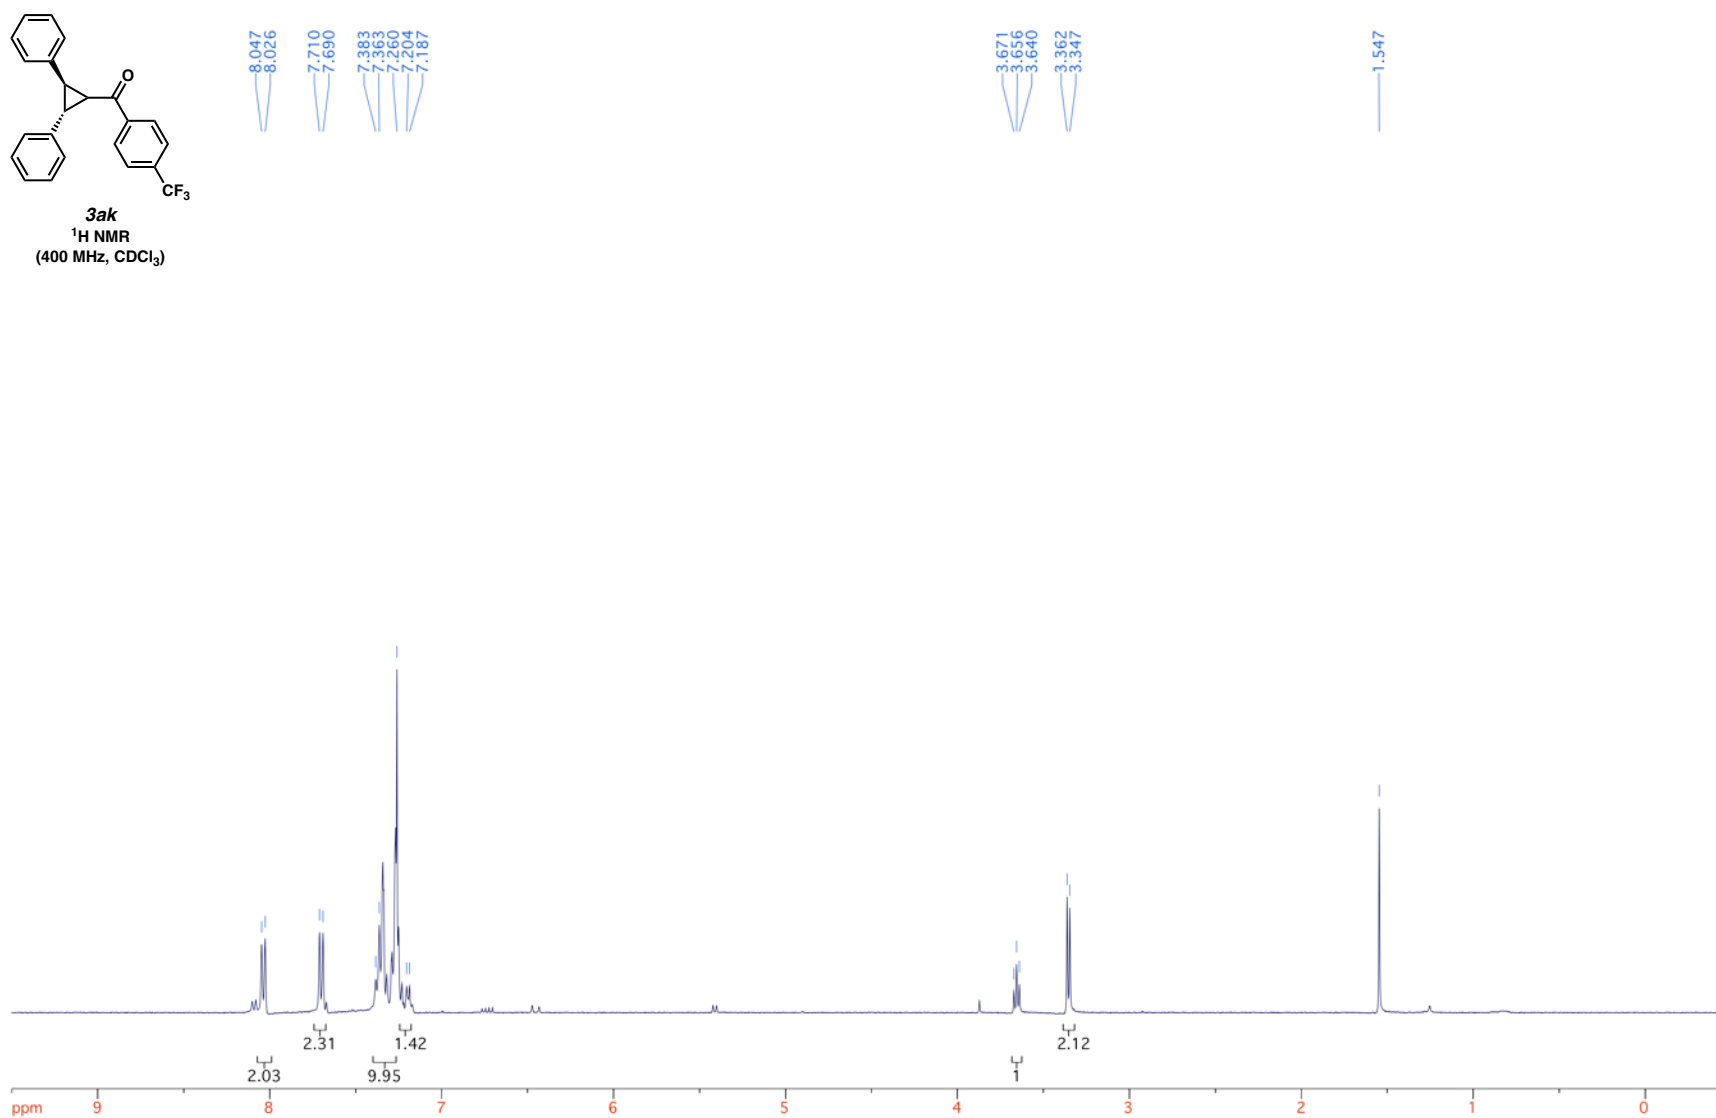

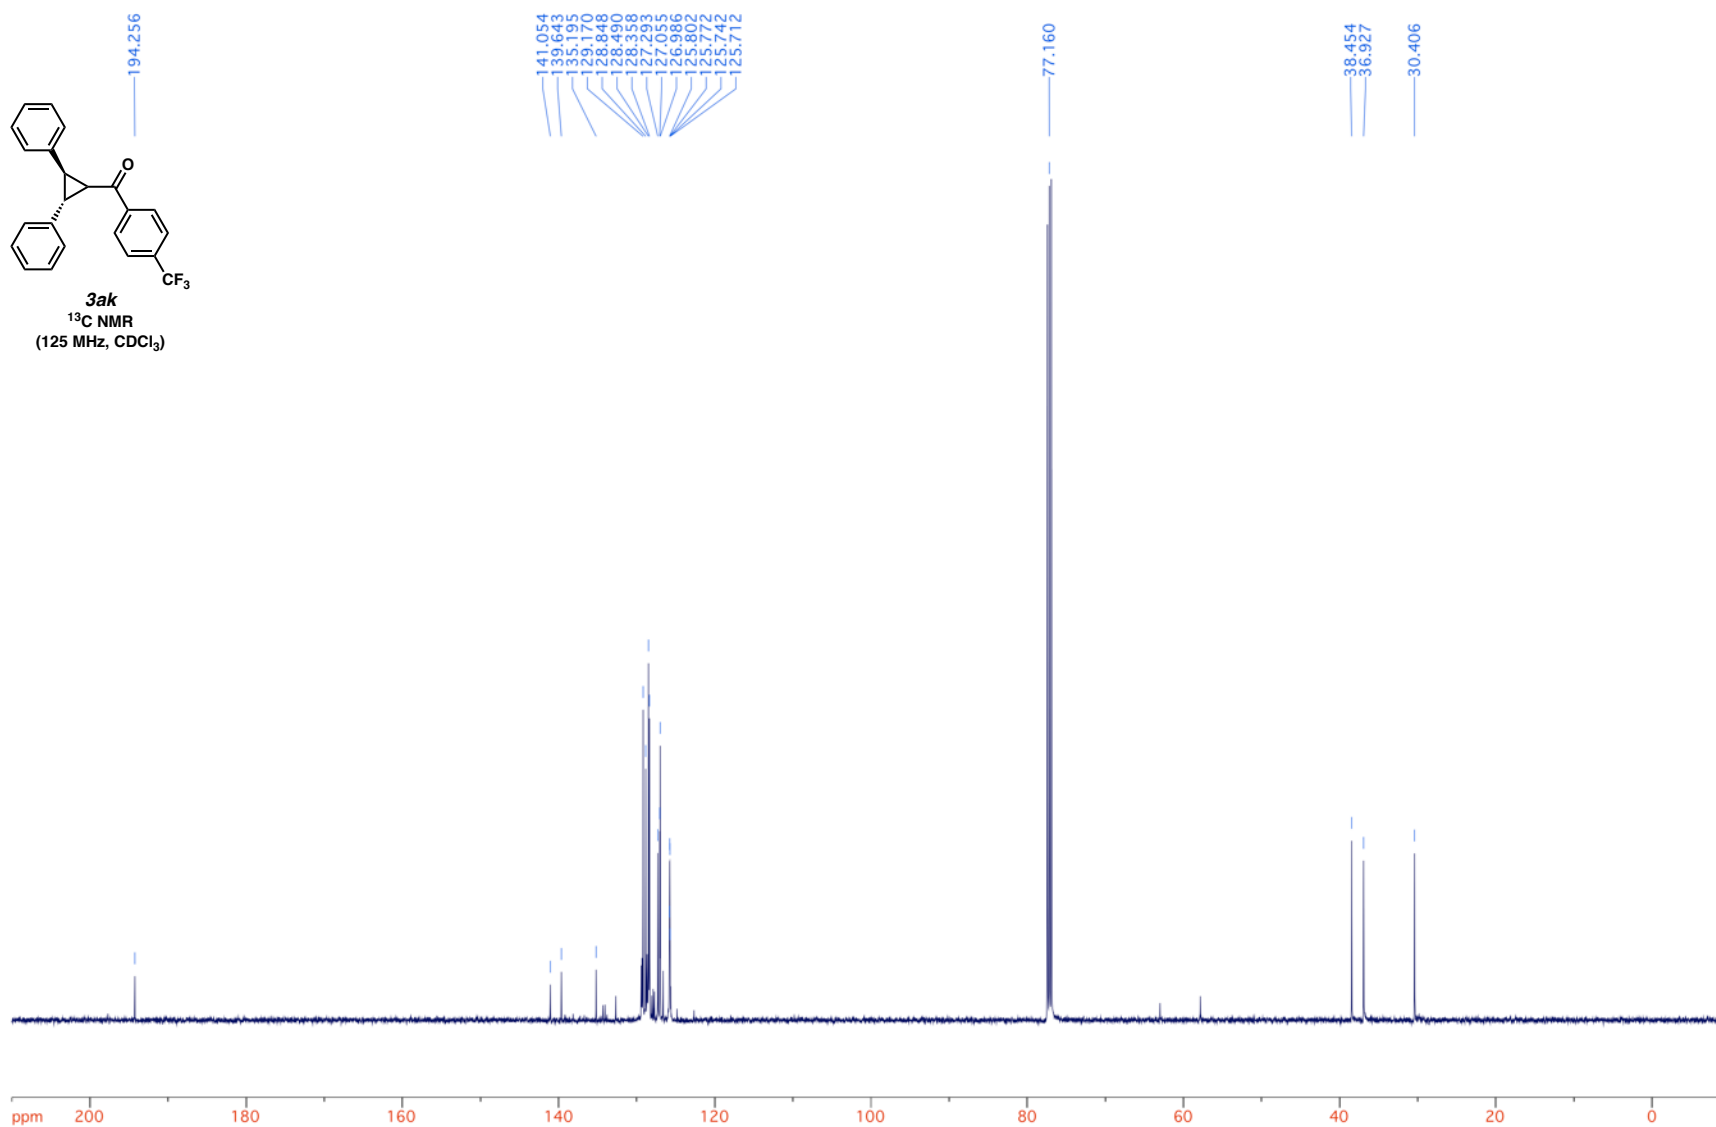

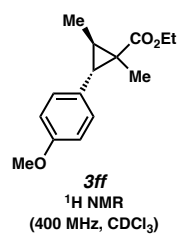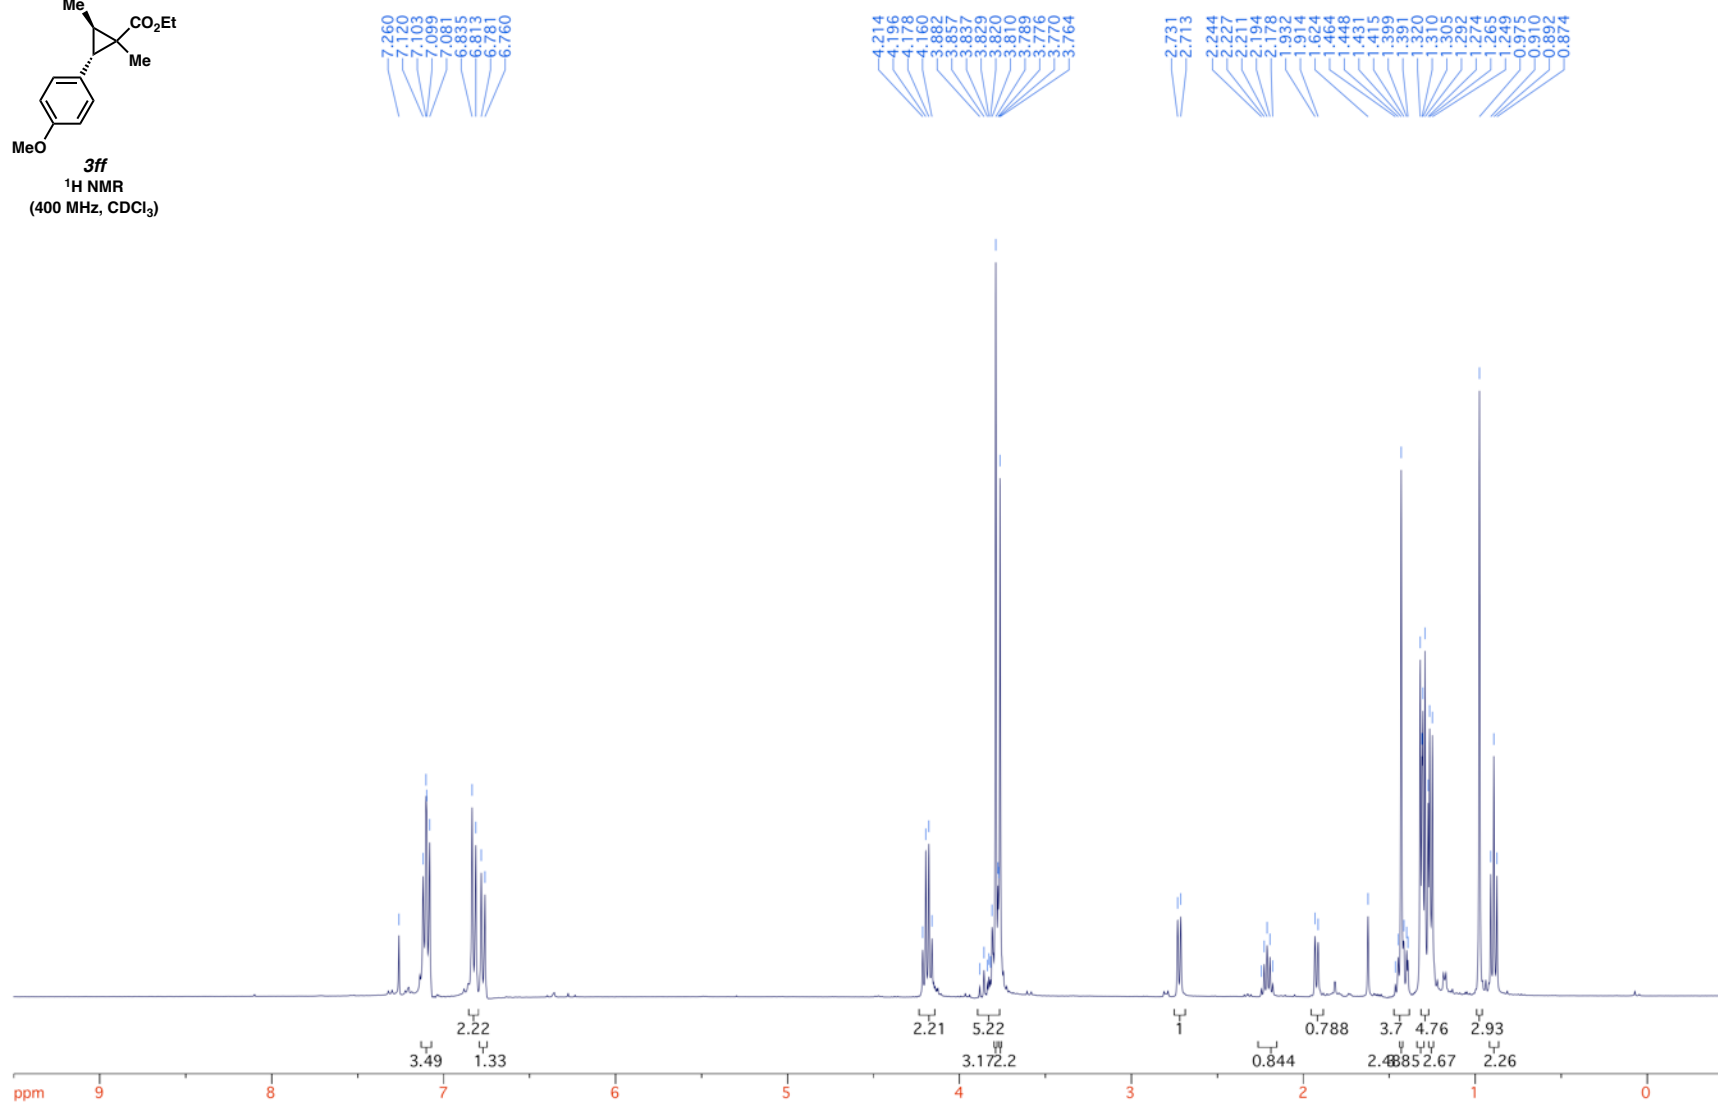



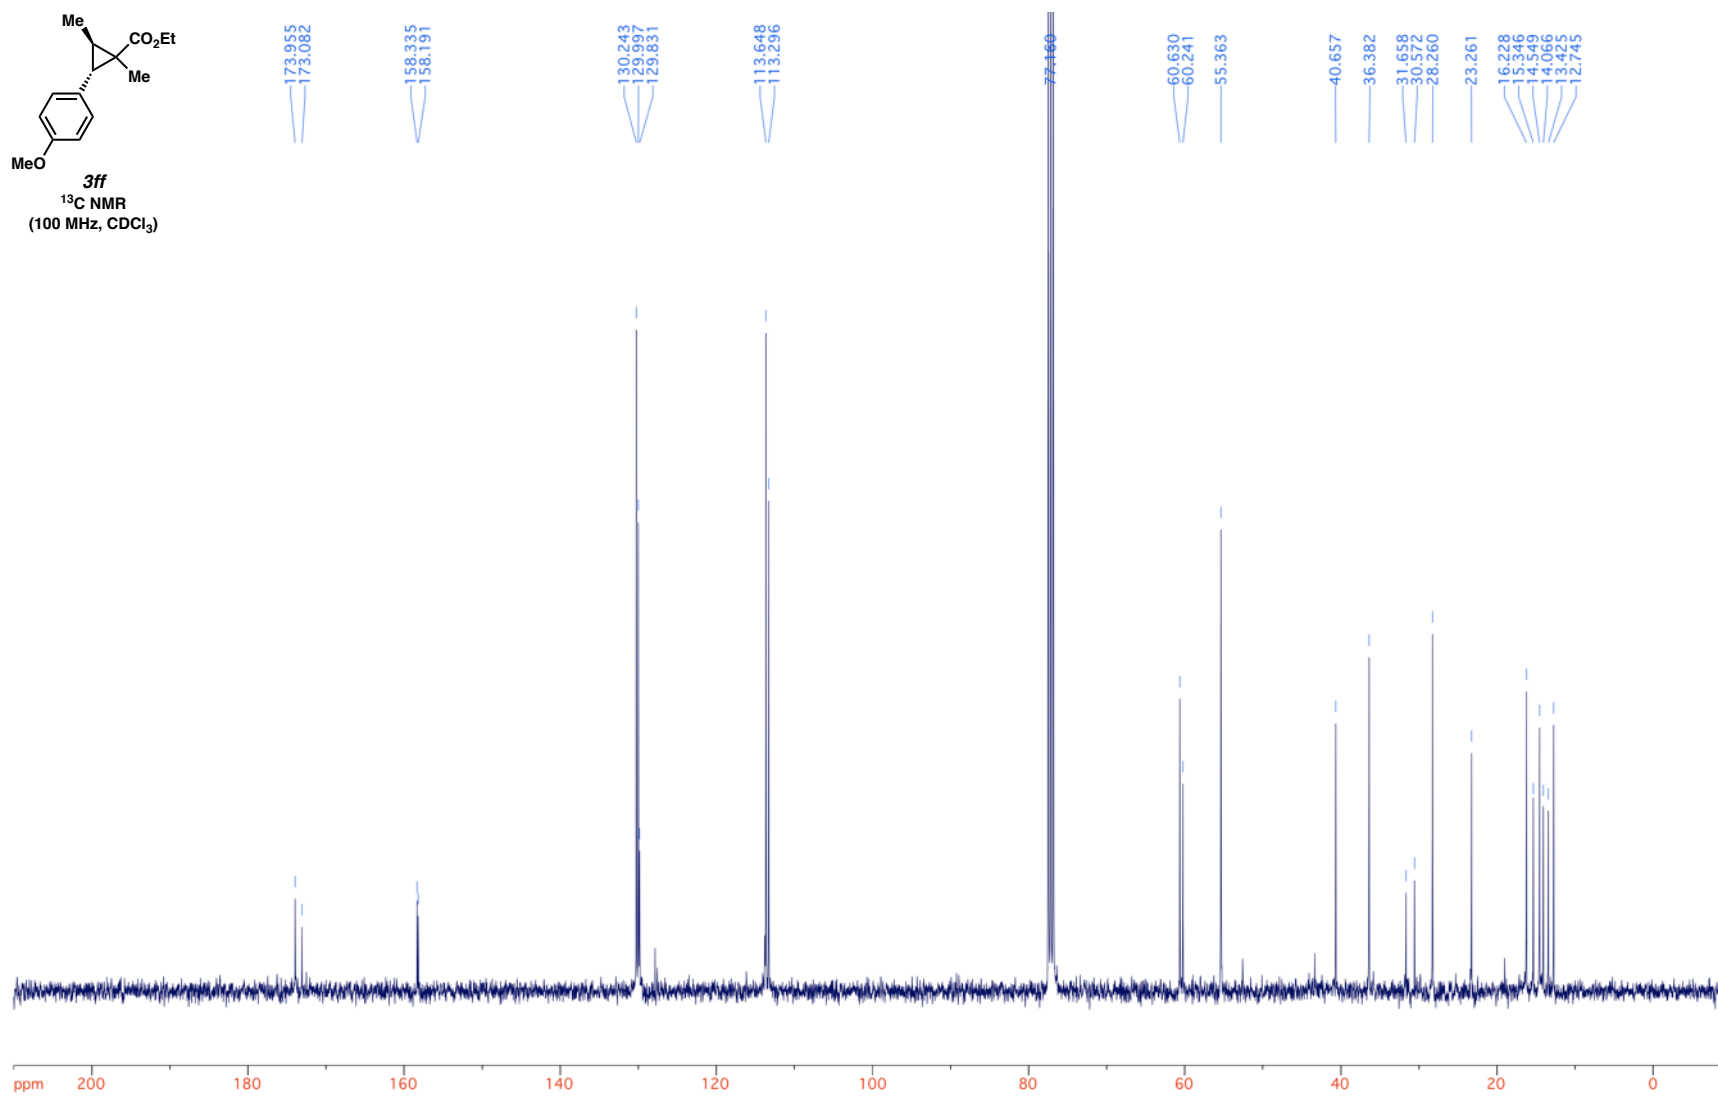

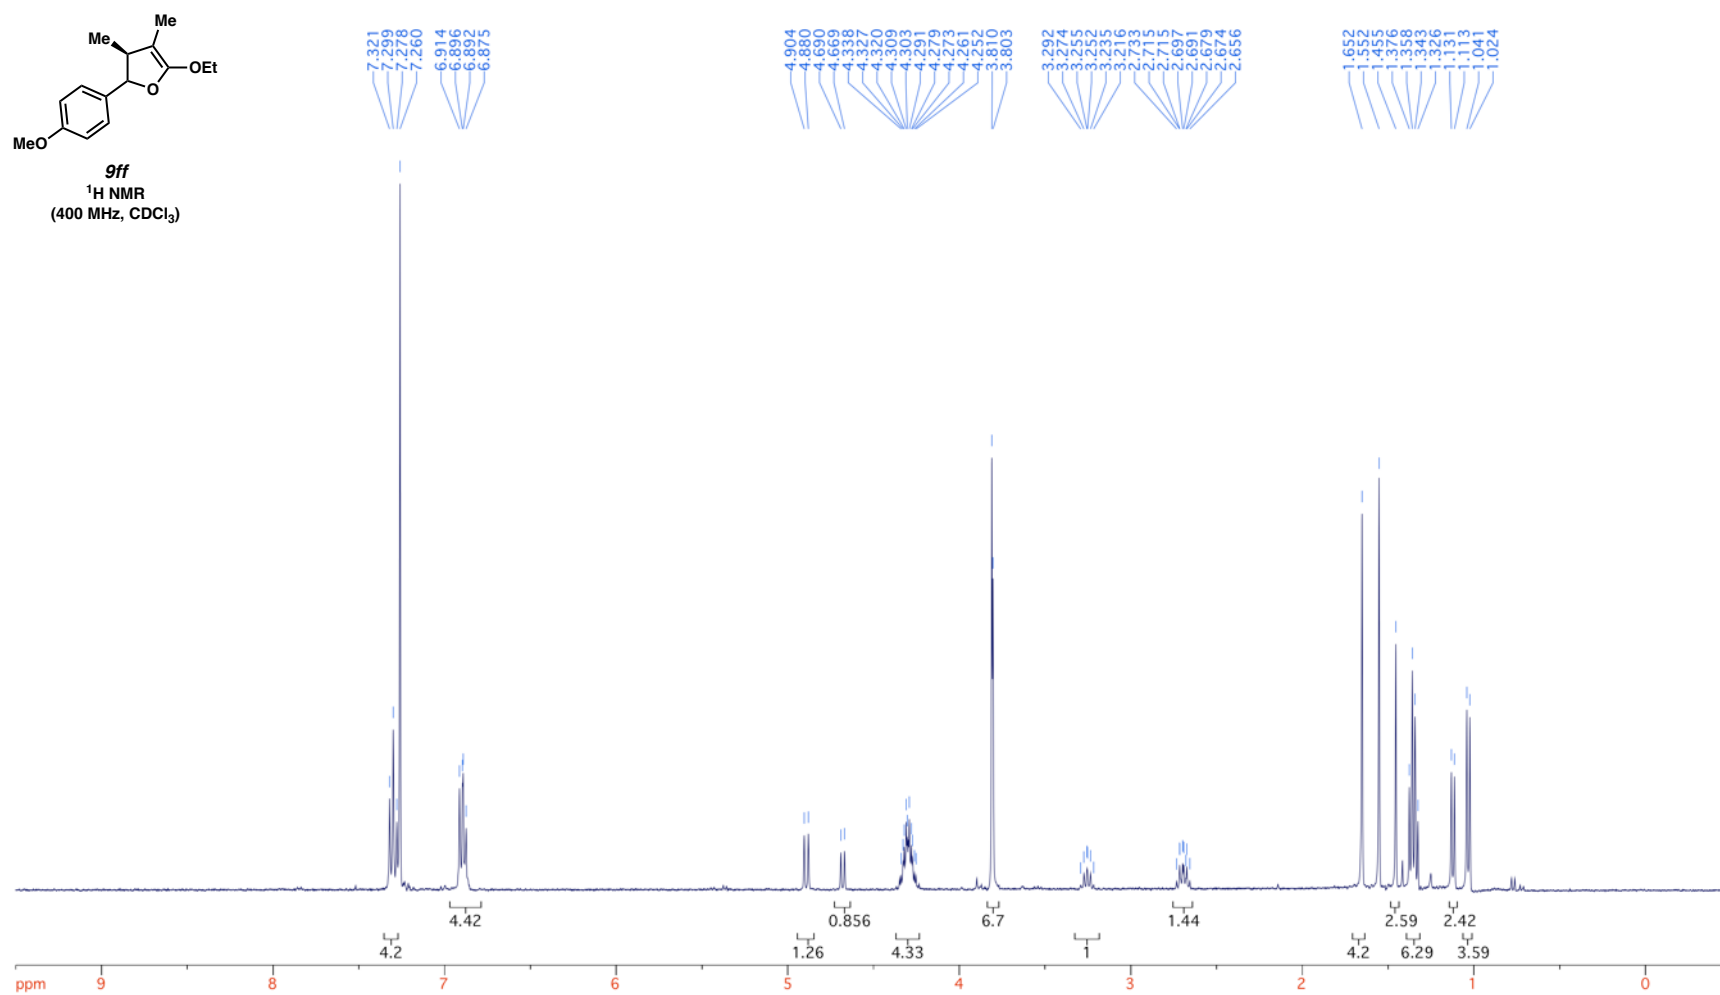

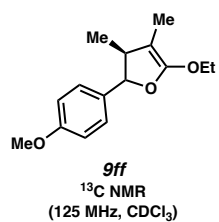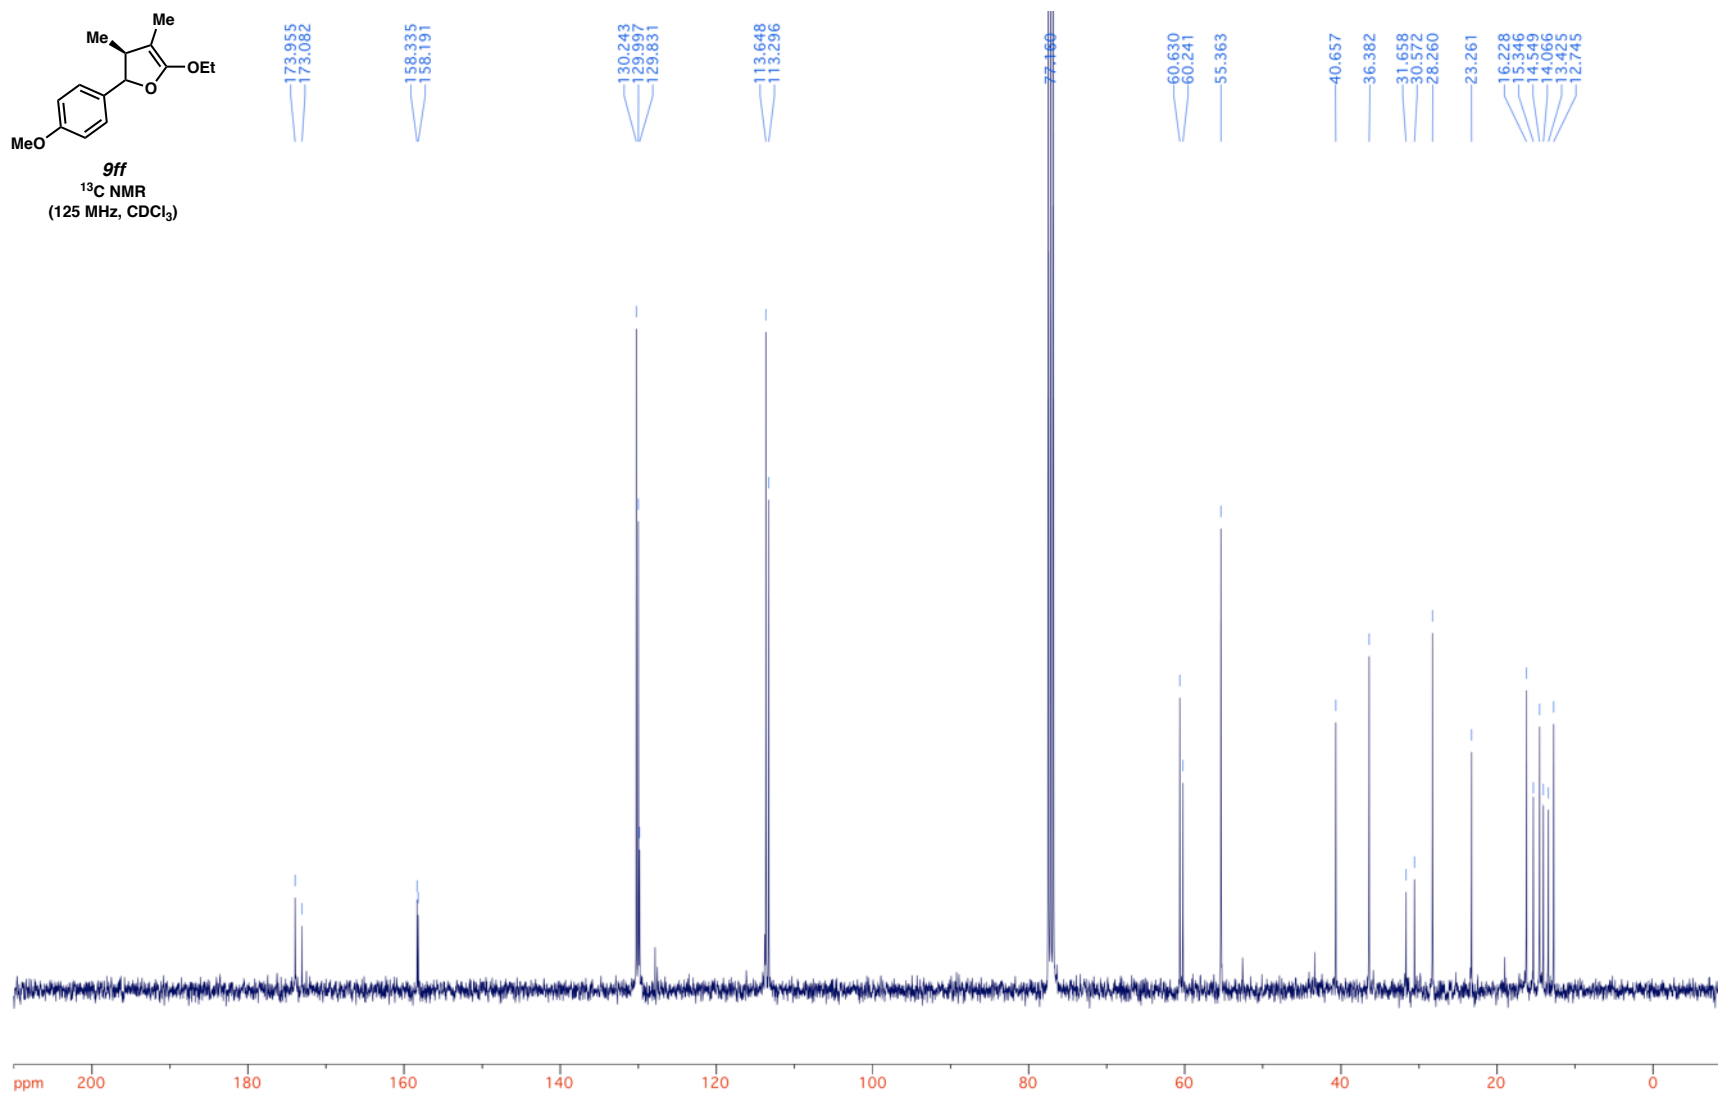

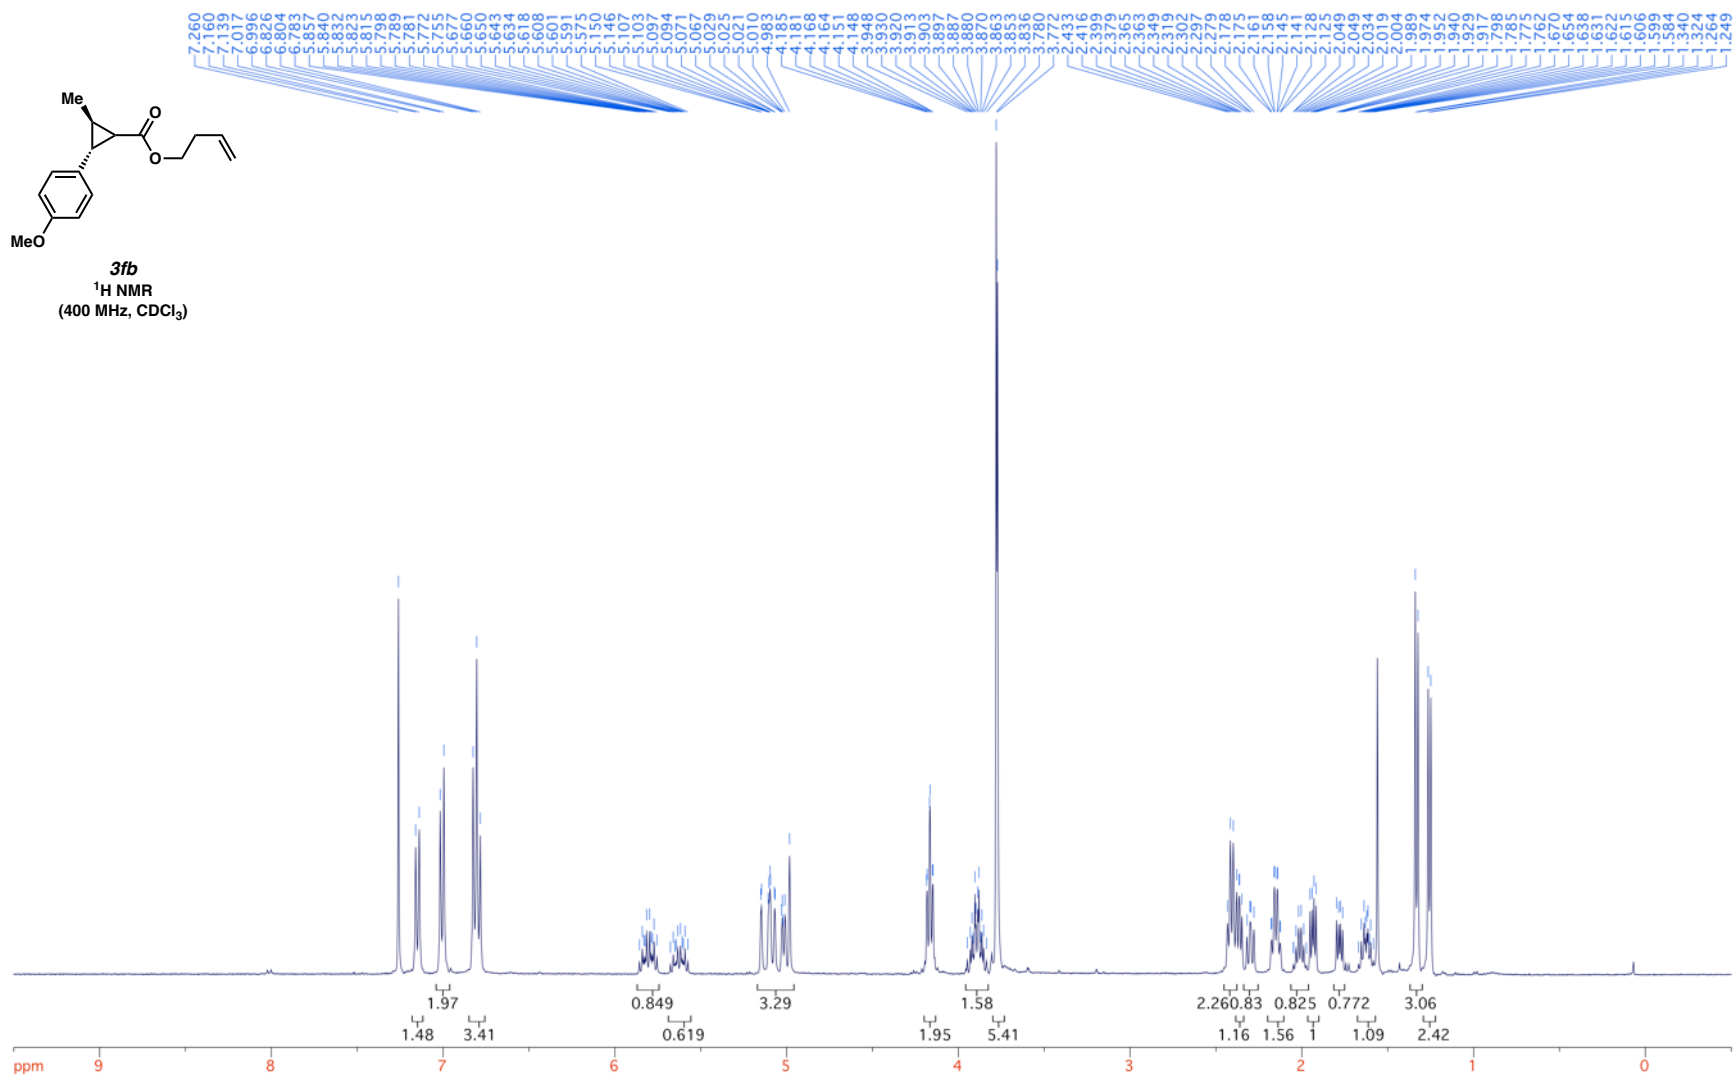

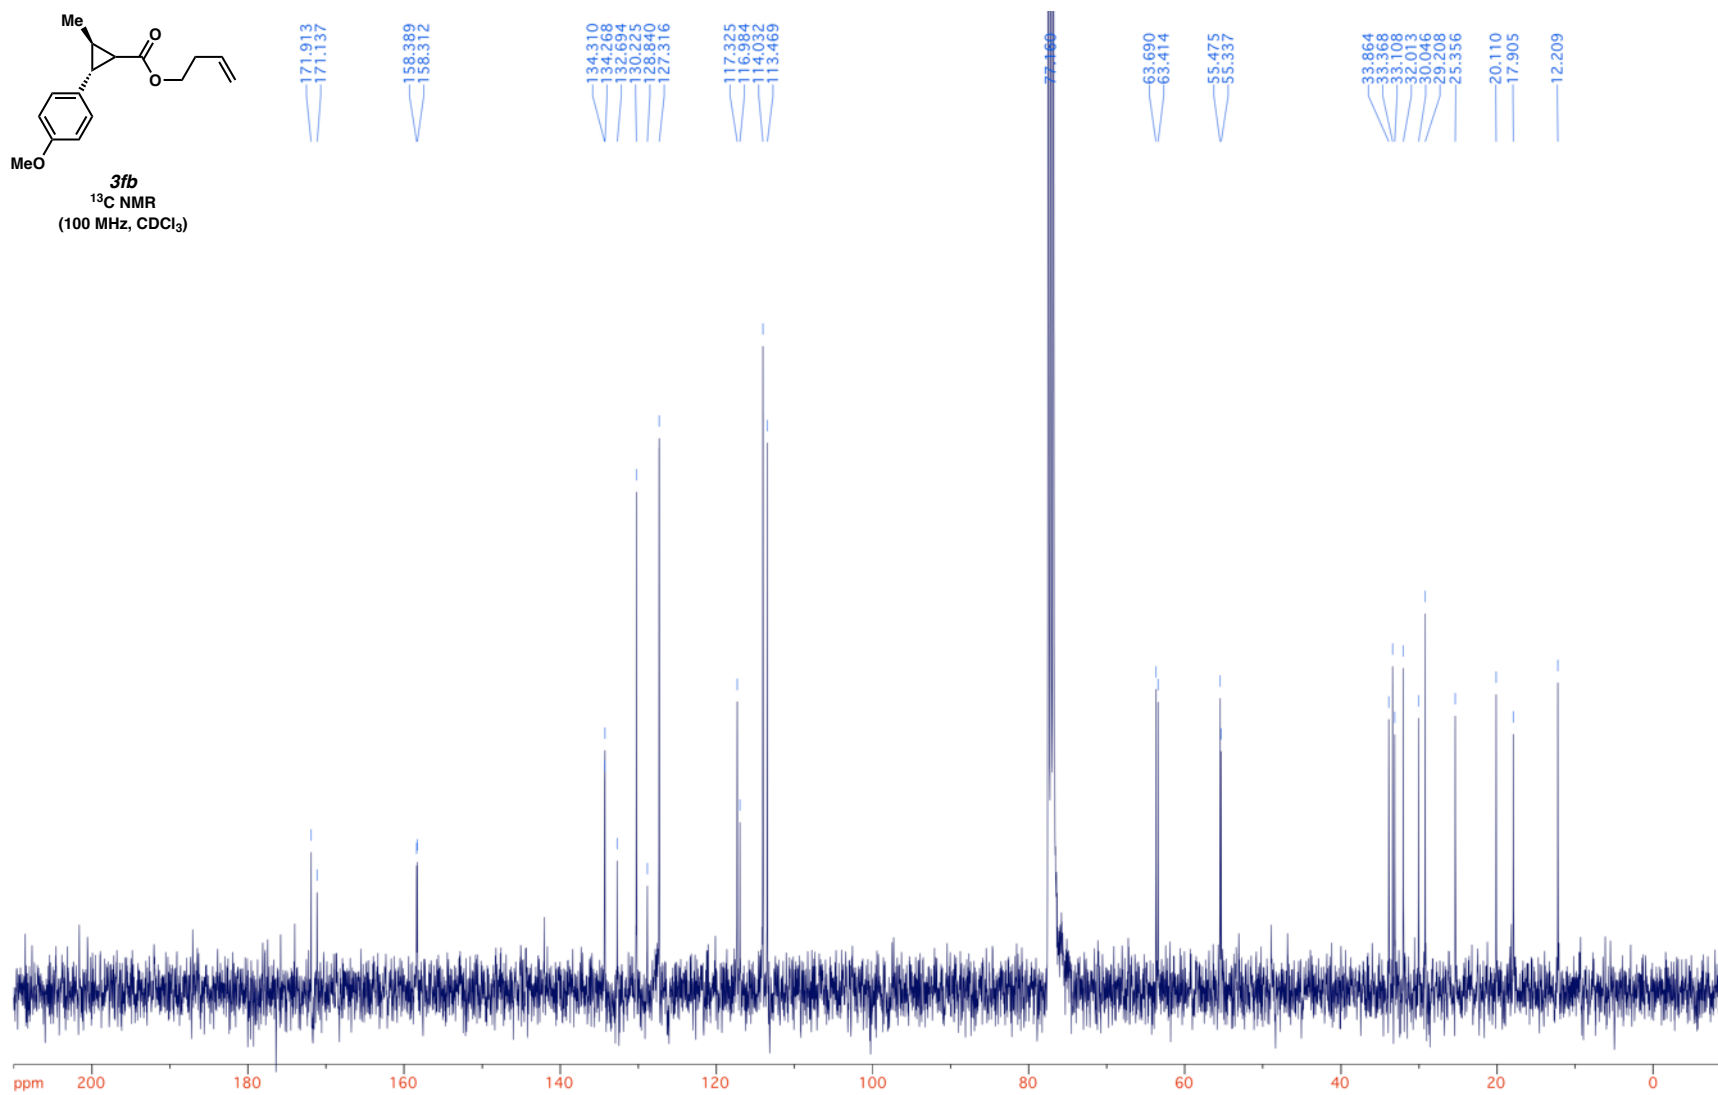

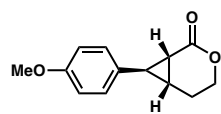

**8**  
<sup>1</sup>H NMR  
 (400 MHz, CDCl<sub>3</sub>)

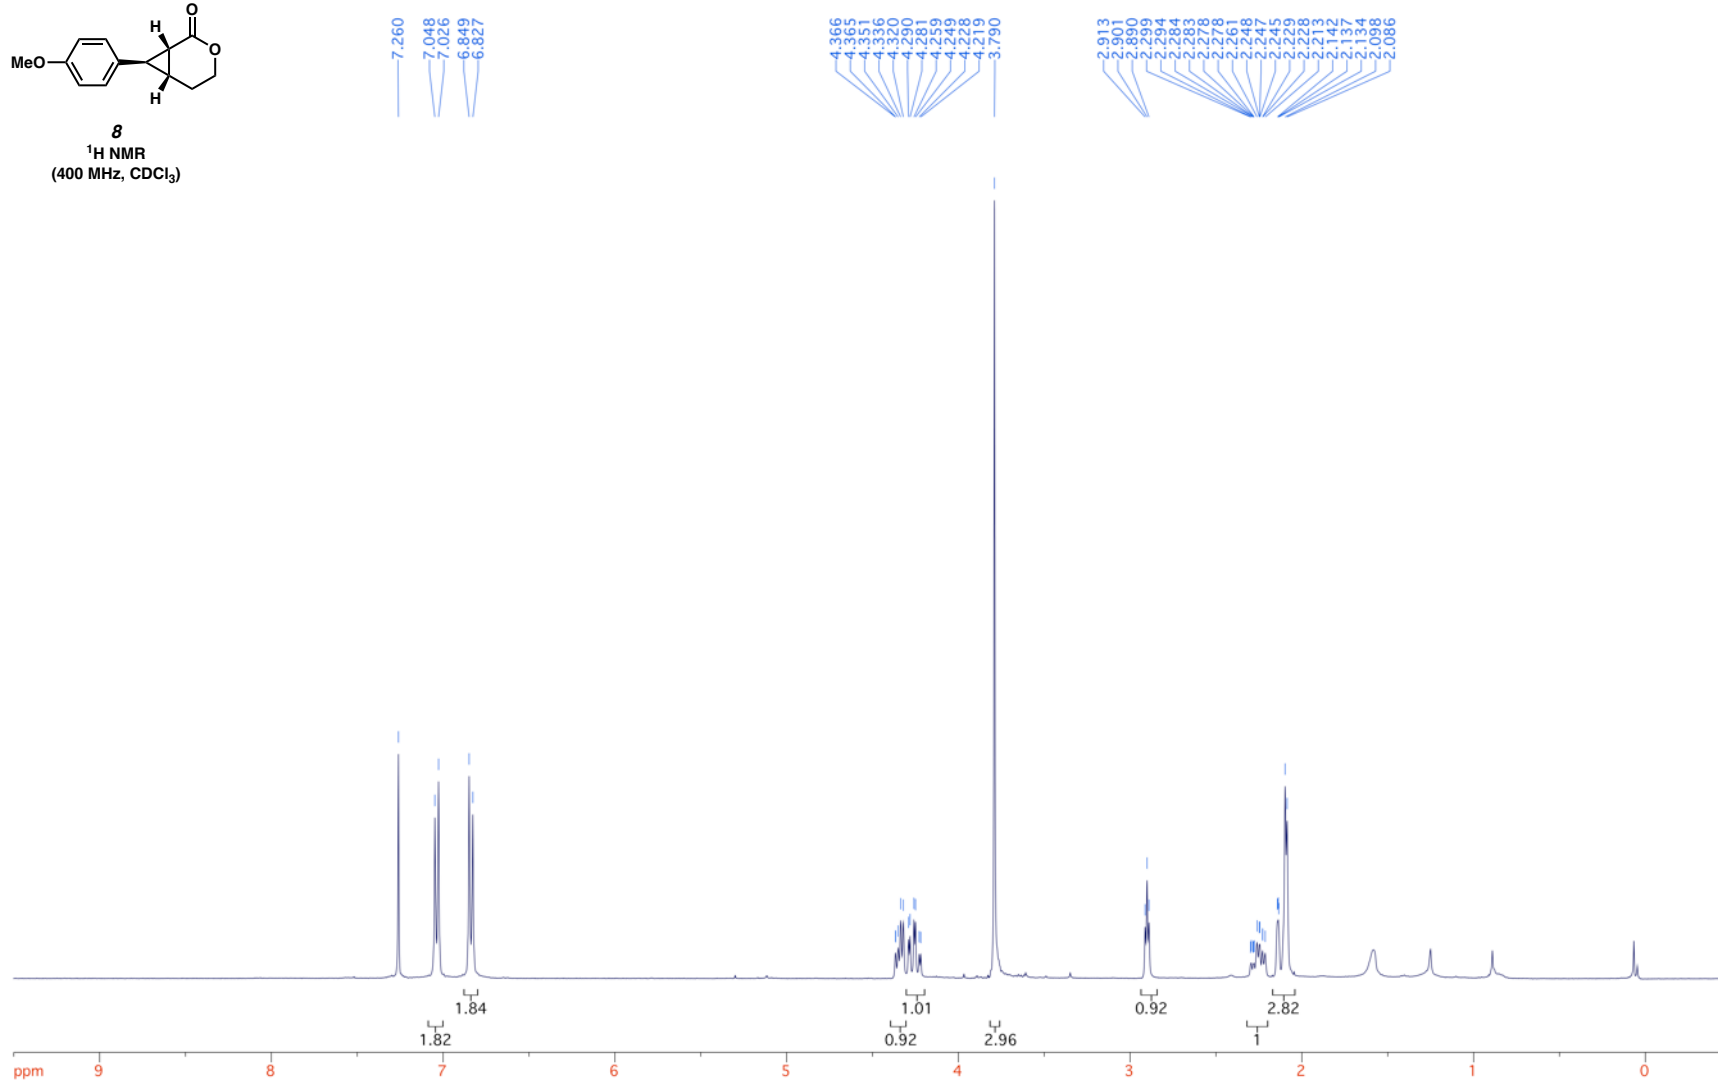

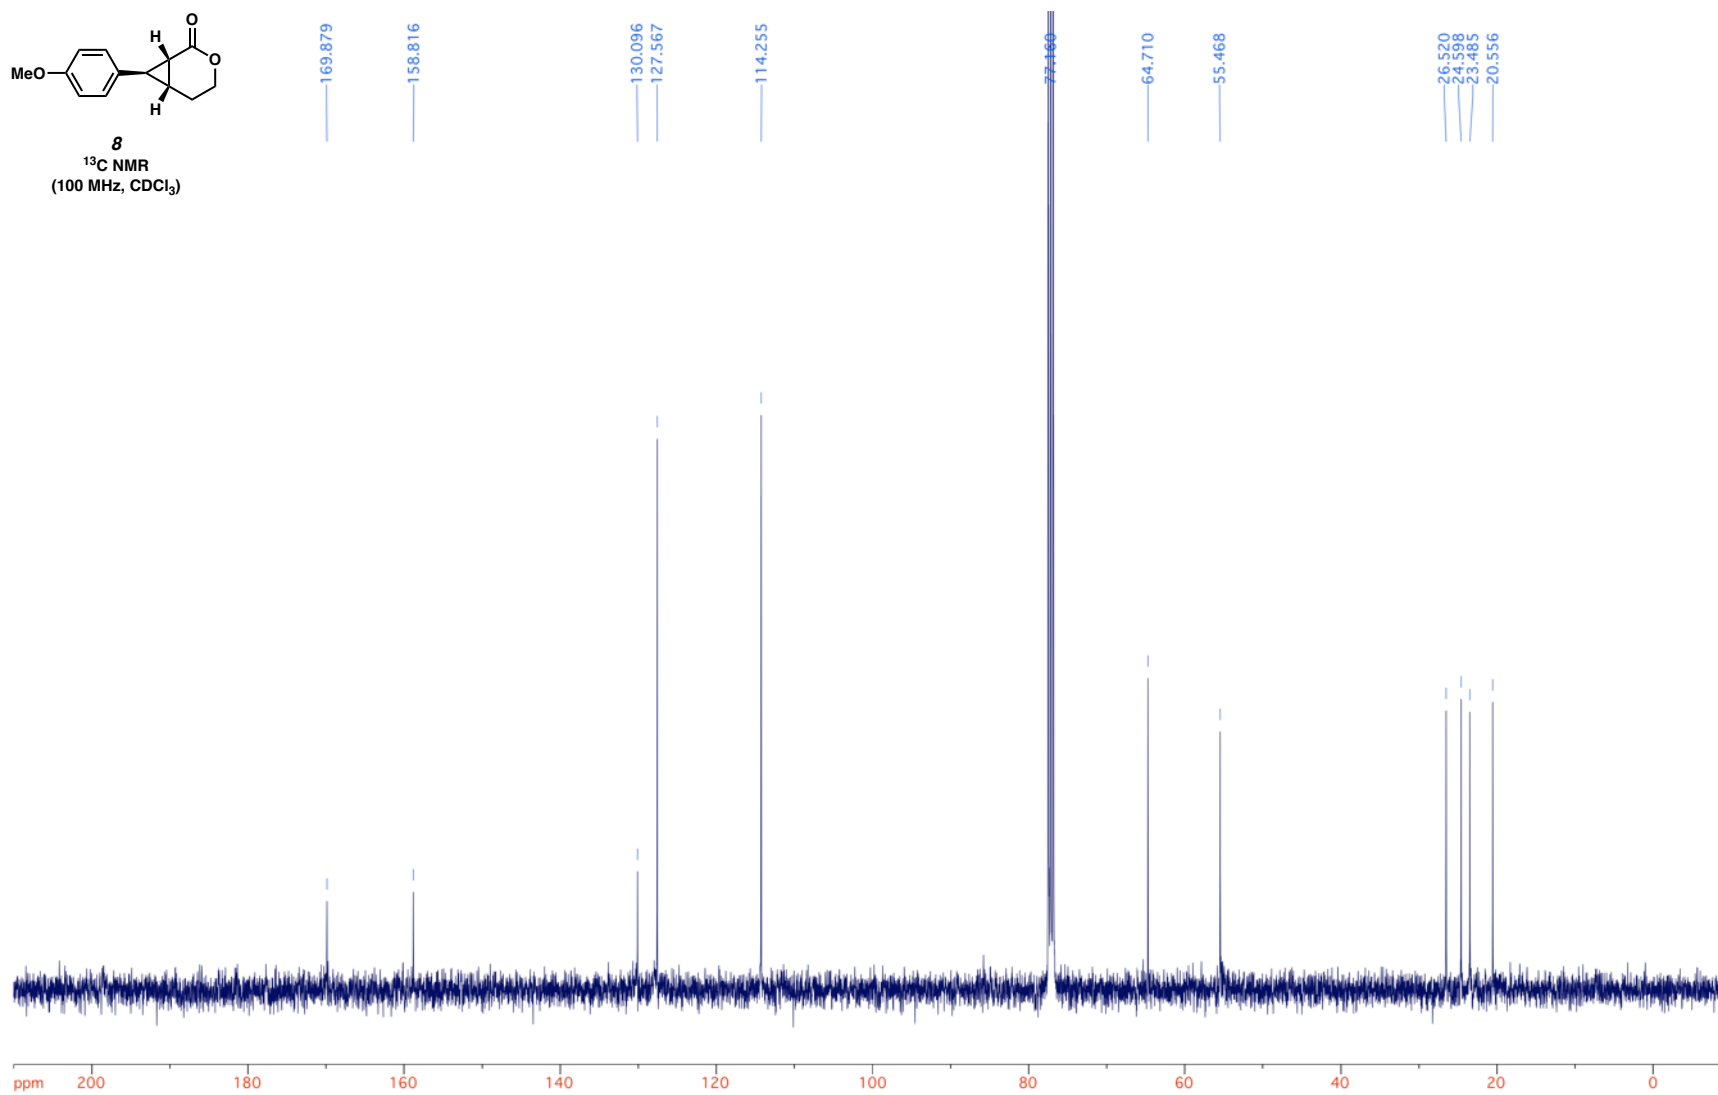

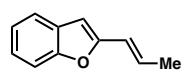

**1r**  
(9 : 1 *E/Z*)  
<sup>1</sup>H NMR  
(400 MHz, CDCl<sub>3</sub>)

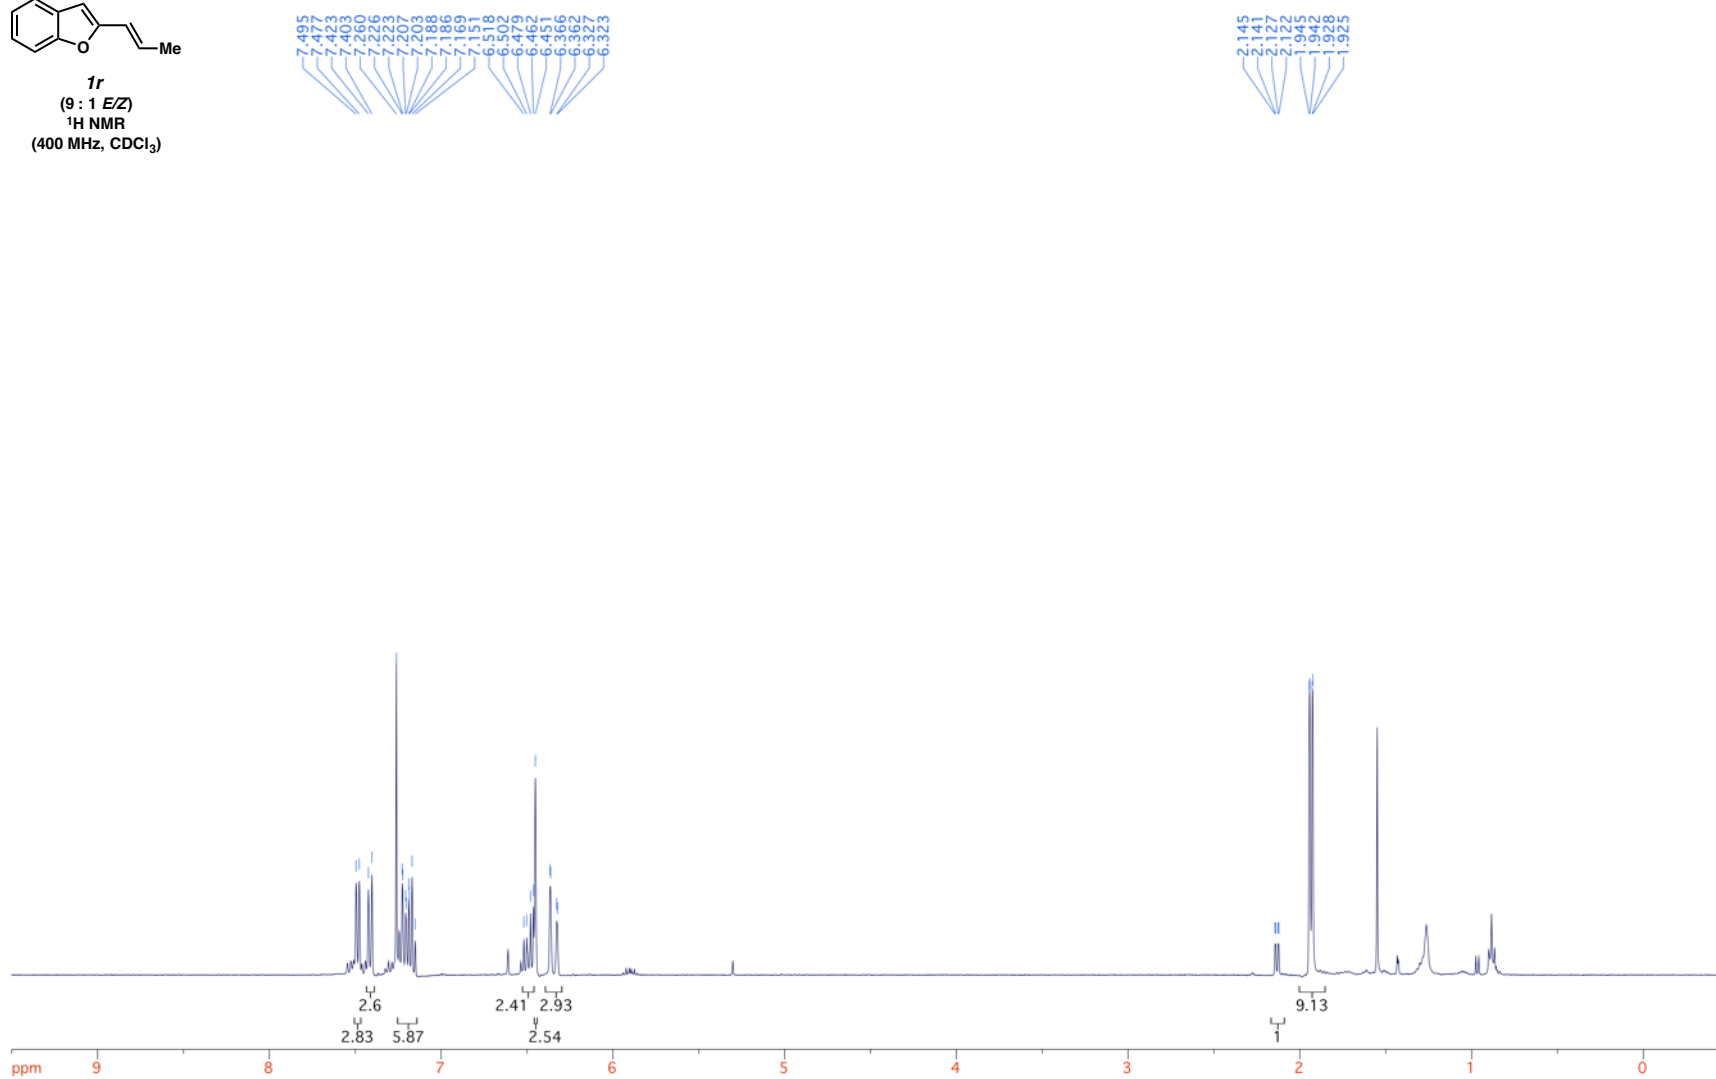



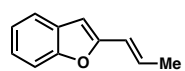

**1r**  
(9 : 1 *E/Z*)  
<sup>13</sup>C NMR  
(125 MHz, CDCl<sub>3</sub>)

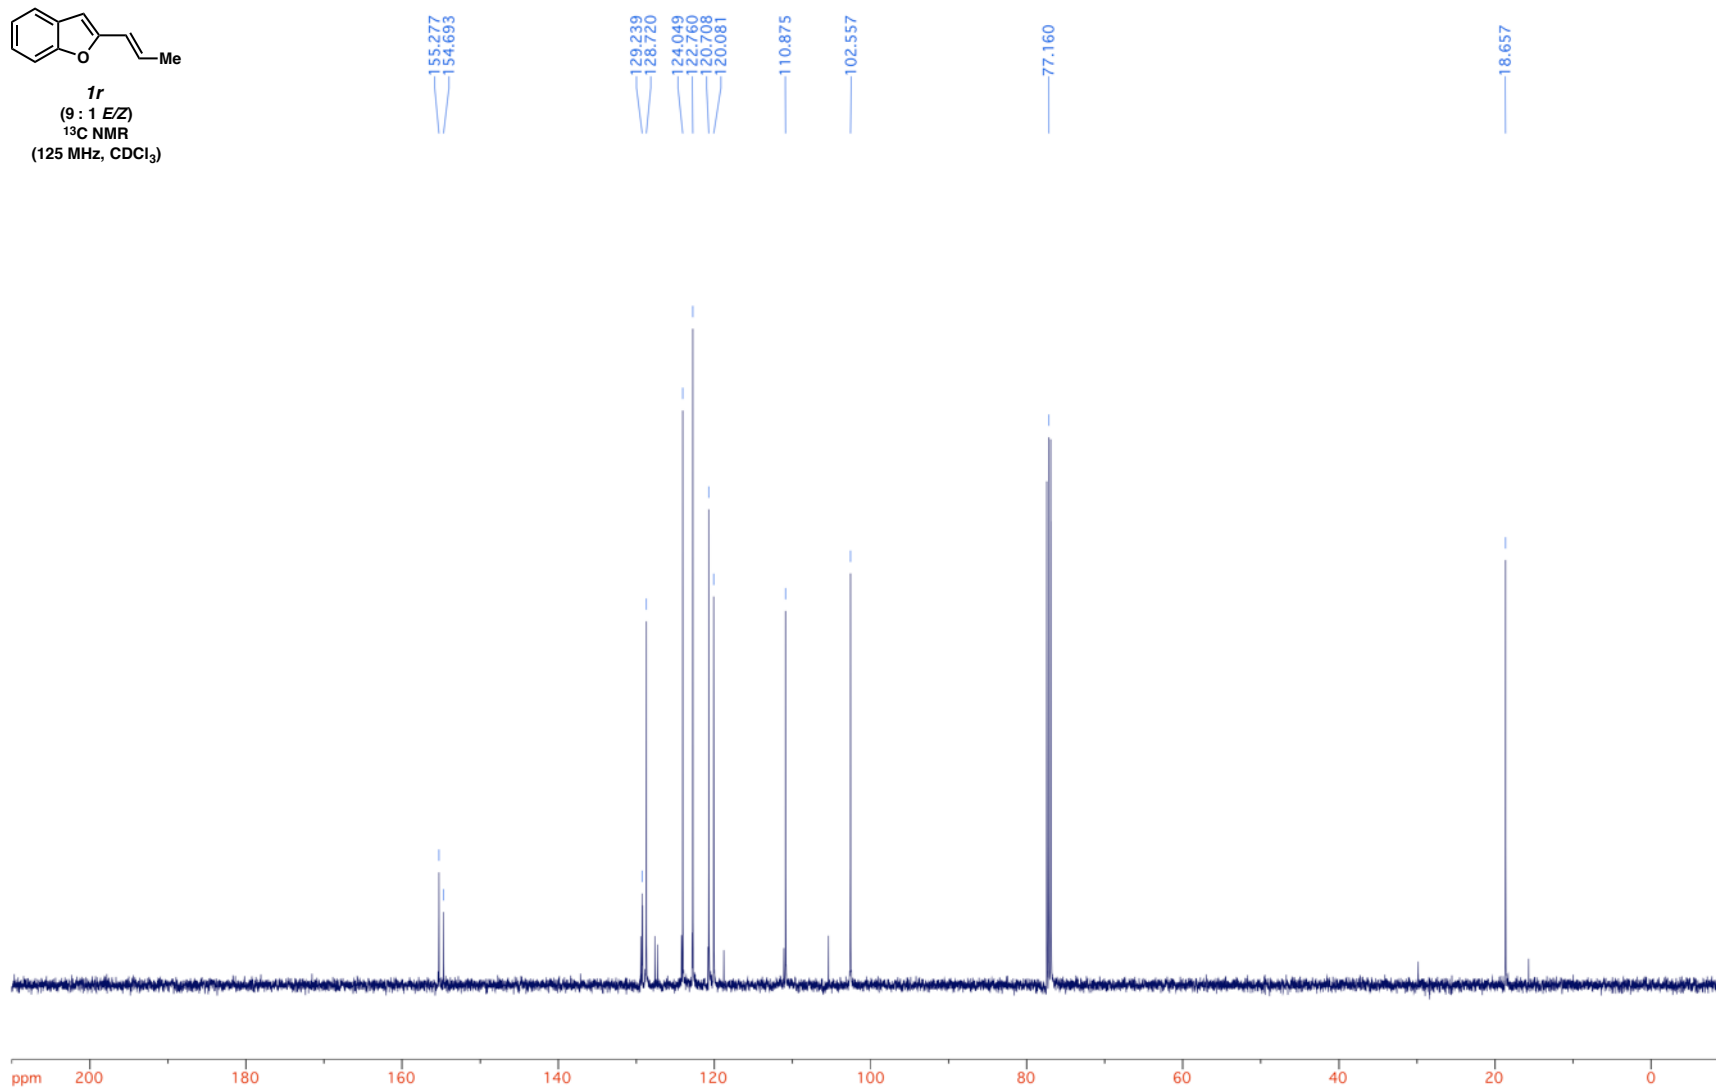

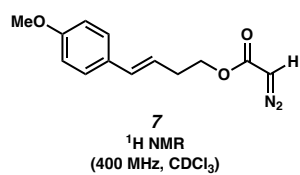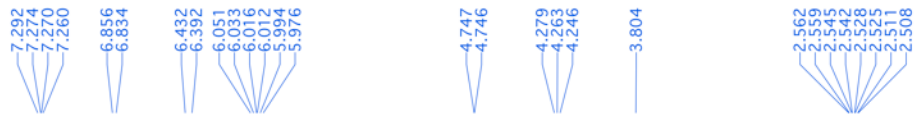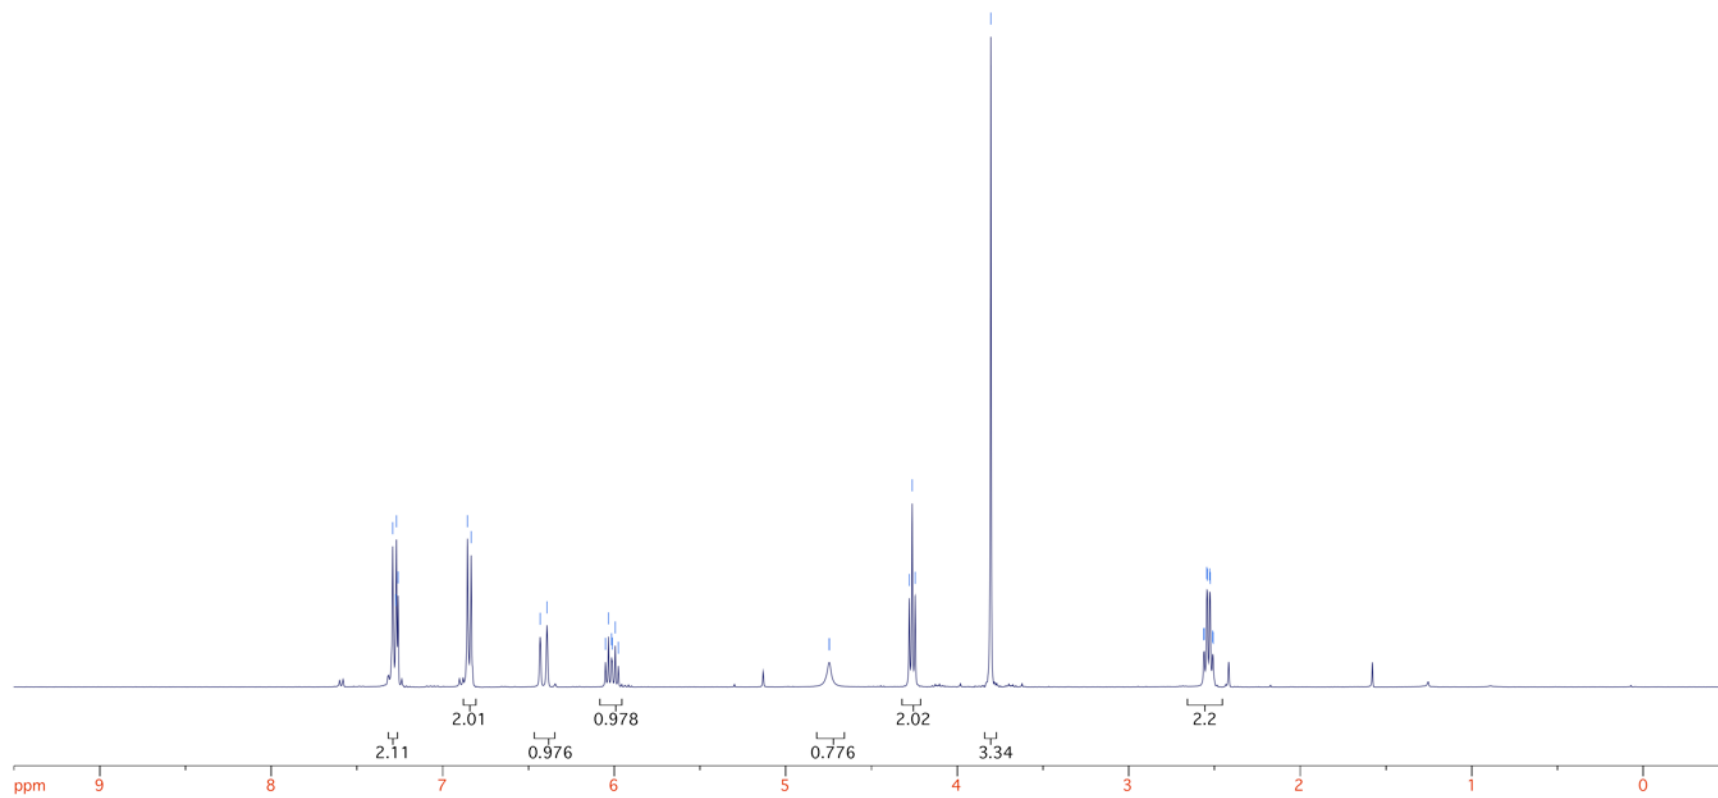

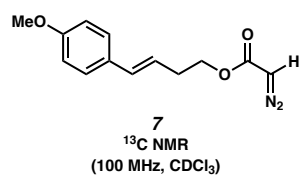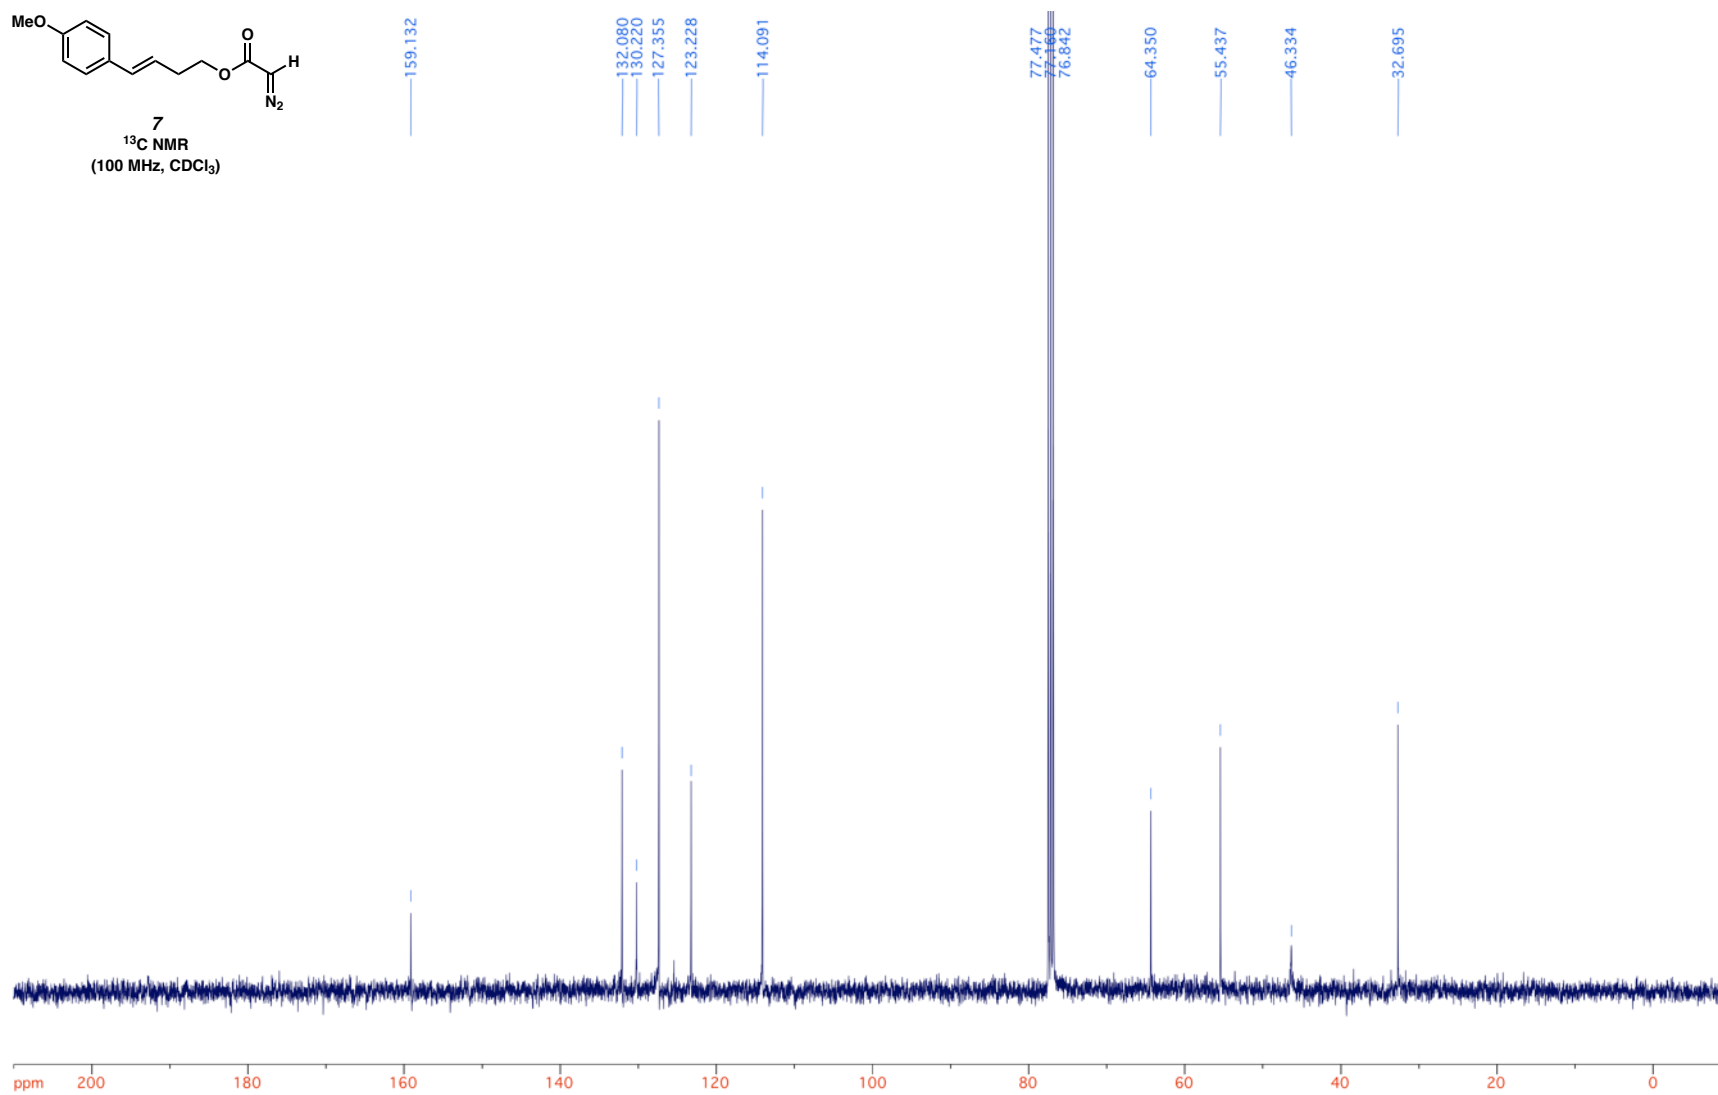

Supplement: NIHMS969341-supplement-SI_File.pdf [file NIHMS969341-supplement-SI_File.pdf]
